# Supplementary material for: Chiral tertiary propargylic alcohols via Pd-catalyzed carboxylative kinetic resolution
Source: Royal Society of Chemistry journal article supplement (doi:10.1039/d0qo01106a), 2020-01-01
Supplement: d0qo01106a1.pdf [file d0qo01106a1.pdf]

## Chiral tertiary propargylic alcohols via Pd-catalyzed carboxylative kinetic resolution

Jie Wang,<sup>a</sup> Wanli Zhang,<sup>a</sup> Penglin Wu,<sup>a</sup> Chaofan Huang,<sup>a</sup> Yangguangyan Zheng,<sup>a</sup> Weifeng Zheng,<sup>\*a</sup> Hui Qian<sup>\*a</sup> and Shengming Ma<sup>\*a,b</sup>

<sup>a</sup> Research Center for Molecular Recognition and Synthesis, Department of Chemistry, Fudan University, 220 Handan Lu, Shanghai 200433, P. R. China. E-mail: 17110220080@fudan.edu.cn, qian\_hui@fudan.edu.cn

<sup>b</sup> State Key Laboratory of Organometallic Chemistry, Shanghai Institute of Organic Chemistry, Chinese Academy of Sciences, 345 Lingling Lu, Shanghai 200032, P. R. China. E-mail: masm@sioc.ac.cn

|                                                                         |          |
|-------------------------------------------------------------------------|----------|
| General information                                                     | S2-S3    |
| Determination of the absolute configuration                             | S4-S6    |
| Synthesis of chiral tertiary propargylic alcohols                       | S7-S24   |
| Gram-scale reactions                                                    | S24-S26  |
| References                                                              | S27      |
| <sup>1</sup> H and <sup>13</sup> C NMR and HPLC spectra of the products | S28-S123 |

**General Information.** NMR spectra were taken with a Bruker Avance III spectrometer (400 MHz for  $^1\text{H}$  NMR, 100 MHz for  $^{13}\text{C}$  NMR) in  $\text{CDCl}_3$ . All  $^1\text{H}$  NMR experiments were measured with tetramethylsilane (0 ppm) in  $\text{CDCl}_3$  as the internal reference;  $^{13}\text{C}$  NMR experiments were measured in relative to the signal of  $\text{CDCl}_3$  (77.0 ppm). All reactions were carried out in Schlenk tubes. (*R*)-DTBM-SEGphos was purchased from Strem Chemicals Inc.;  $(\text{PhO})_2\text{POOH}$  was purchased from Energy Chemical, acidified with 1 N HCl under stirring, and extracted with dichloromethane, then the solvent was removed under vacuum. Petroleum ether (b.p. 60~90°C) was purchased from Shanghai Titan Scientific Co., Ltd. Toluene was purchased from Shanghai Titan Scientific Co., Ltd and used as received without further purification. The reaction should be conducted in a hood working efficiently with a CO detector due to the toxicity of CO gas. All the temperatures are referred to the oil baths used. Recoveries of substrates were determined by  $^1\text{H}$  NMR analysis using dibromomethane as the internal standard. The racemic propargylic alcohols were prepared according to the literature methods.<sup>1</sup>

## Calculation of selectivity factor $s^2$

In the kinetic resolution process, the selectivity factor  $s$  is related to the rate constants of the reaction of  $R$ - and  $S$ -enantiomers,  $k_R$  and  $k_S$ , respectively, by  $s = k_R/k_S$ , for  $k_R > k_S$ .

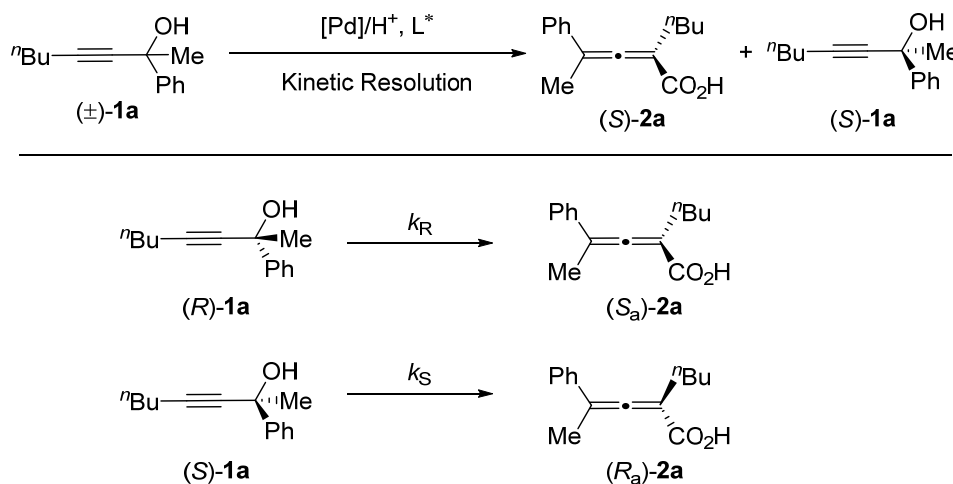

Basically,  $s$  can be established by the following equation for a first order reaction, in which  $C$  is the conversion and  $ee$  is the enantiomeric excess value of recovered substrate:

$$s = \frac{\ln [1-C(1+ee)]}{\ln [1-C(1-ee)]}$$

Besides,  $C$  can be calculated from the enantiomeric excess values of recovered substrate and product,  $ee$  and  $ee'$ , respectively, through the equation  $C = ee/(ee+ee')$ , if  $(R)$ -**1a** and  $(S)$ -**1a** were stereospecifically transferred to  $(S_a)$ -**2a** and  $(R_a)$ -**2a** in this kinetic resolution process. The conversion was determined by  $^1\text{H}$  NMR analysis.

## Determination of the absolute configuration

In principle, we could determine the absolute configuration of chiral propargylic alcohols by comparing the sign of optical rotation. However, the value of the optical rotation of this series of compounds is small, some confusion exists in the literatures regarding the relationship between the sign of optical rotation and the absolute configuration.<sup>3</sup> The reported optical rotation of (*S*)-**1a** is  $[\alpha]_D^{30} = -0.3$  [(*c* = 1.20, CHCl<sub>3</sub>), 90% ee], which is too small.

Nakajima and coworkers determined the absolute configuration of chiral tertiary propargylic alcohols by transferring them into methyl esters.<sup>3</sup> Then the absolute configuration of the obtained ester was unambiguously determined to be *S* by the sign of optical rotation,<sup>4</sup> which suggested that the original propargylic alcohol had an *S*-configuration.

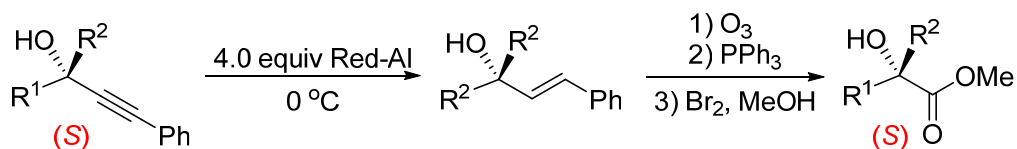

In their paper, the ee of (*S*)-**1a** (90%) was determined by HPLC analysis (HPLC condition: Daicel Chiralcel OD-H; eluent, hexane/*i*-PrOH = 200/1; flow rate: 1.0 mL/min, 254 nm, *t<sub>R</sub>* (minor) = 20.7 min, *t<sub>R</sub>* (major) = 22.5 min) and the HPLC spectra for *rac*- and (*S*)-**1a** reported by Nakajima are shown in Figure S1.

File Name k4085r-0%ee.crm

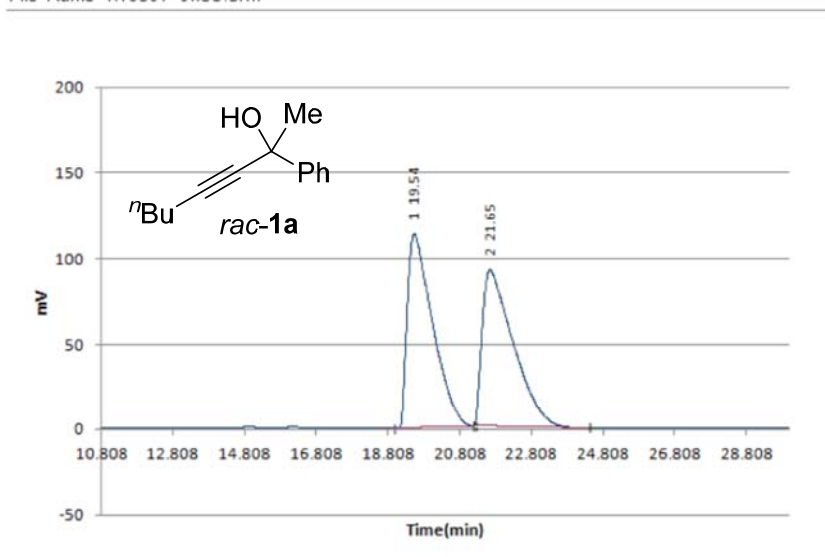

comment OD-H<sub>2</sub>Hex/IPA=200/1\_flow=1.0 mL/min\_UL

Date 2013/6/3 12:20

| No. | Rt    | Peak Name | Area     | Area(%) | Height | Amount | NTP    | Tf    | Resolution |
|-----|-------|-----------|----------|---------|--------|--------|--------|-------|------------|
| 1   | 19.54 |           | 5575289  | 50.1966 | 113604 | ----   | 3278.4 | 2.315 | 1.391      |
| 2   | 21.65 |           | 5531623  | 49.8034 | 92003  | ----   | 2678.4 | 2.588 | ----       |
|     |       |           | 11106911 | 100     | 205607 |        |        |       |            |

File Name k4085b-90%ee.crm

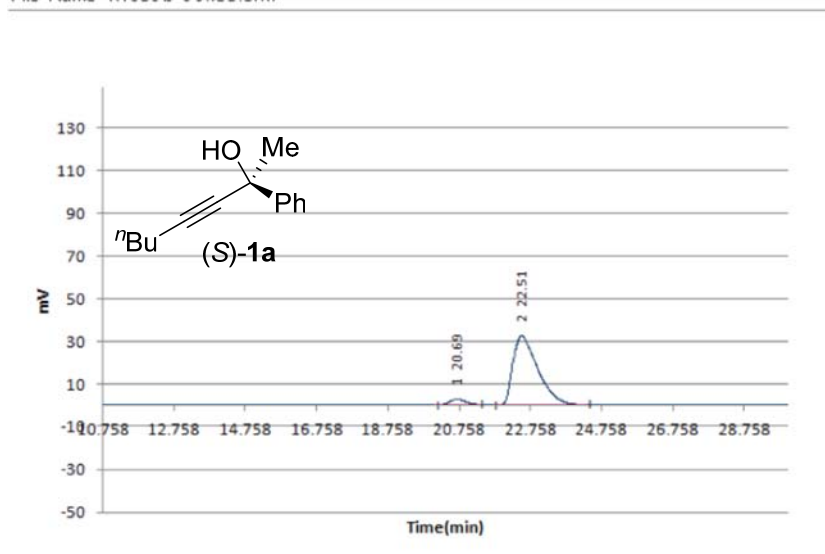

comment OD-H<sub>2</sub>Hex/IPA=200/1\_flow=1.0 mL/min\_UL

Date 2013/6/3 11:40

| No. | Rt    | Peak Name | Area    | Area(%) | Height | Amount | NTP    | Tf    | Resolution |
|-----|-------|-----------|---------|---------|--------|--------|--------|-------|------------|
| 1   | 20.69 |           | 80604   | 4.9267  | 2439   | ----   | 8762.6 | 1.144 | 1.65       |
| 2   | 22.51 |           | 1555458 | 95.0733 | 32250  | ----   | 4672.5 | 1.765 | ----       |
|     |       |           | 1636062 | 100     | 34689  |        |        |       |            |

**Figure S1.** The HPLC spectra of *rac*- and (*S*)-1a reported by Nakajima and coworkers

Then we determined the ee of **1a** prepared via our protocol with the same HPLC conditions (HPLC conditions: Daicel Chiralcel OD-H; eluent, hexane/*i*-PrOH = 200/1; flow rate: 1.0 mL/min, 214 nm,  $t_R$  (minor) = 19.0 min,  $t_R$  (major) = 20.8 min). After comparing the retention time (Figure S2), the absolute configuration of **1a** was determined to be *S*.

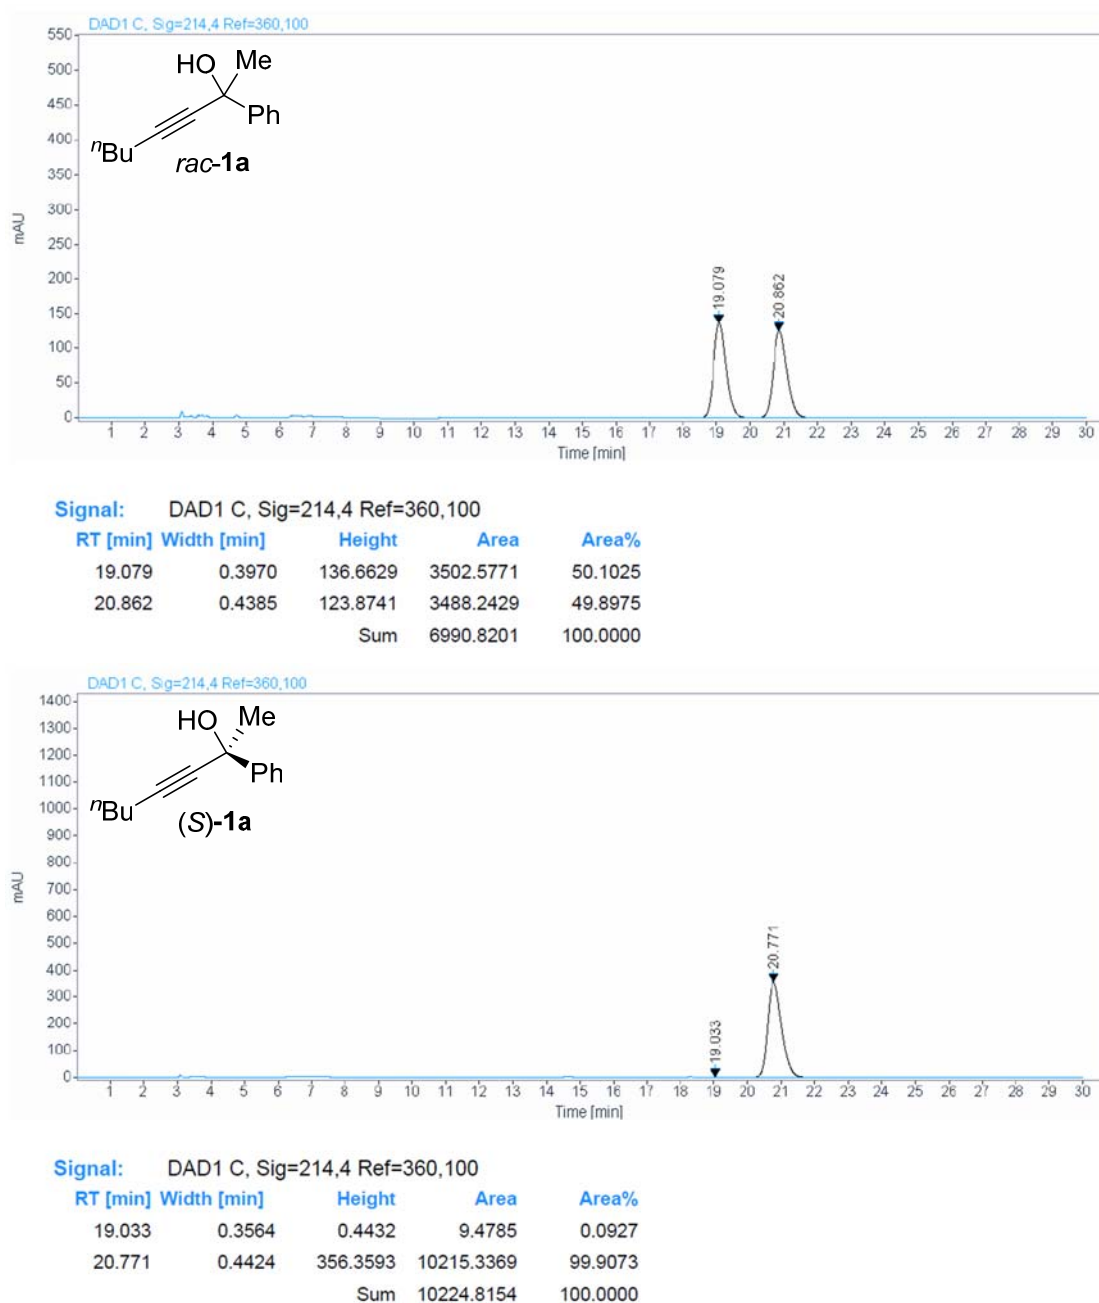

Figure S2. The HPLC spectra of *rac*- and (*S*)-**1a** synthesized via our protocol

## Synthesis of chiral tertiary propargylic alcohols

### (1) Preparation of (*S*)-2-phenyloct-3-yn-2-ol ((*S*)-**1a**)

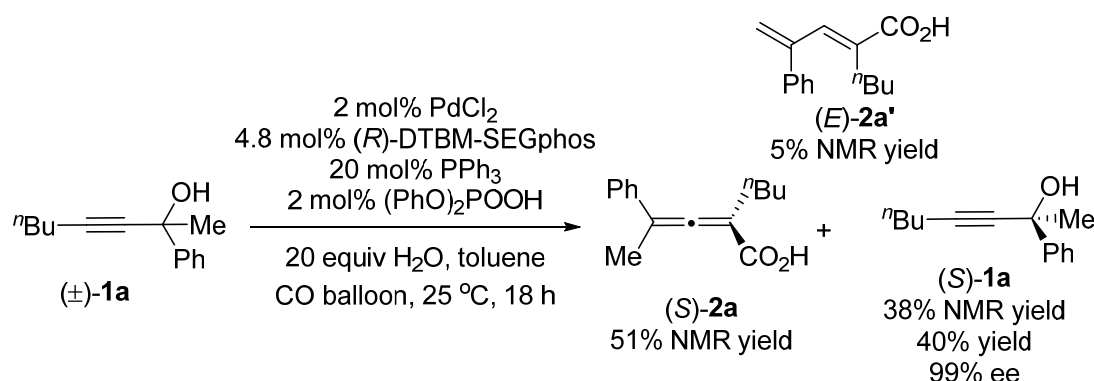

**Typical Procedure:** To a Schlenk flask (25 mL) were added PdCl<sub>2</sub> (3.6 mg, 0.02 mmol), (*R*)-DTBM-SEGphos (57.1 mg, 0.048 mmol), PPh<sub>3</sub> (52.5 mg, 0.2 mmol), and (PhO)<sub>2</sub>POOH (5.0 mg, 0.02 mmol). The flask was then degassed and refilled with Ar for three times to ensure the complete exclusion of air. Then ( $\pm$ )-**1a** (201.3 mg, 1.0 mmol)/toluene (3 mL) and H<sub>2</sub>O (360  $\mu$ L, d = 1.0 g/mL, 360.0 mg, 20.0 mmol), toluene (2 mL) were added sequentially under Ar. After that, the Ar gas line was closed. The resulting mixture was then frozen with a liquid nitrogen bath, degassed to remove the argon inside completely, and refilled with CO by a balloon of CO (about 1 L) for three times. Then the liquid nitrogen bath was removed and the resulting mixture was allowed to stand until completely thawed, vigorously stirred at 25 °C with a balloon of CO for 18 h, treated with H<sub>2</sub>O<sub>2</sub> (40  $\mu$ L, d = 1.13 g/mL, 30 wt. % in H<sub>2</sub>O, 13.5 mg, 0.4 mmol), stirred for 30 min at room temperature, diluted with 5 mL of ethyl acetate, filtered through a short column silica gel (3 cm) eluted with ethyl acetate (20 mL), and concentrated. The crude product was analyzed with <sup>1</sup>H NMR with CH<sub>2</sub>Br<sub>2</sub> (35  $\mu$ L) as the internal standard: 51% NMR yield of (*S*)-**2a** and 5% of (*E*)-**2a'**<sup>5</sup> were formed with 38% of (*S*)-**1a** remained. The residue was purified by chromatography on silica gel to afford the pure product (*S*)-**1a**<sup>4</sup> (81.1 mg, 40%) [eluent: petroleum ether / ethyl ether / dichloromethane = 30/1/1 (320 mL), then petroleum ether / ethyl acetate = 8/1 (360 mL)]; 99% ee (HPLC conditions: AS-H column, hexane/*i*PrOH = 98/2, 1.0 mL/min,  $\lambda$  = 214 nm,  $t_R$  (minor) = 6.7 min,  $t_R$  (major) = 10.4 min); [ $\alpha$ ]<sub>D</sub><sup>27</sup> = +2.1 ( $c$  = 1.10, CHCl<sub>3</sub>) [lit.<sup>3</sup> [ $\alpha$ ]<sub>D</sub><sup>30</sup> = -0.3 ( $c$  = 1.20, CHCl<sub>3</sub>)]; oil; <sup>1</sup>H NMR (400 MHz, CDCl<sub>3</sub>):  $\delta$  = 7.64 (d, J

= 7.2 Hz, 2 H, Ar-H), 7.32 (t,  $J = 7.6$  Hz, 2 H, Ar-H), 7.28-7.20 (m, 1 H, Ar-H), 2.64 (s, 1 H, OH), 2.25 (t,  $J = 7.0$  Hz, 2 H, CH<sub>2</sub>), 1.72 (s, 3 H, CH<sub>3</sub>), 1.58-1.48 (m, 2 H, CH<sub>2</sub>), 1.47-1.35 (m, 2 H, CH<sub>2</sub>), 0.91 (t,  $J = 7.2$  Hz, 3 H, CH<sub>3</sub>); <sup>13</sup>C NMR (100 MHz, CDCl<sub>3</sub>):  $\delta = 146.2, 128.1, 127.4, 124.9, 85.6, 83.7, 70.0, 33.5, 30.7, 21.9, 18.3, 13.6$ ; IR (neat):  $\nu = 3397, 2958, 2240, 1447, 1327, 1231, 1063$  cm<sup>-1</sup>; MS (70 eV, EI)  $m/z$  (%): 202 (M<sup>+</sup>, 1.15), 187 (100).

## (2) Preparation of (S)-2-(2-methylphenyl)oct-3-yn-2-ol ((S)-1b)

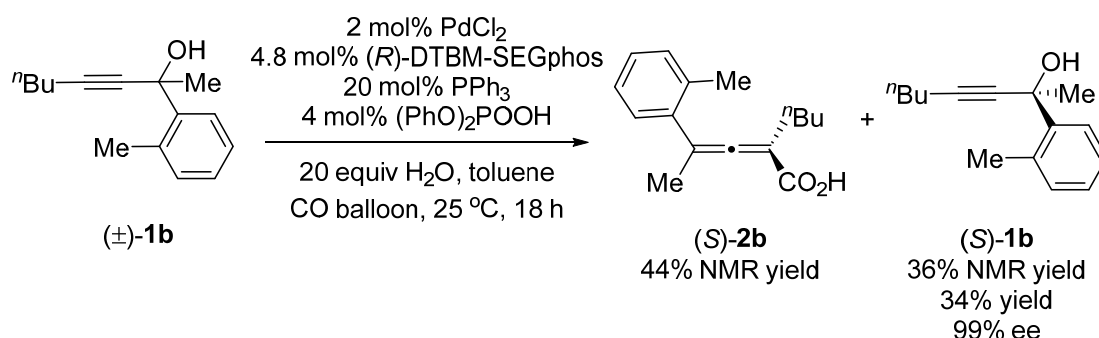

Following Typical Procedure, the reaction of PdCl<sub>2</sub> (3.6 mg, 0.02 mmol), (*R*)-DTBM-SEGphos (56.5 mg, 0.048 mmol), PPh<sub>3</sub> (52.6 mg, 0.2 mmol), (PhO)<sub>2</sub>POOH (10.0 mg, 0.04 mmol), (±)-1b (215.9 mg, 1.0 mmol), and H<sub>2</sub>O (360 μL,  $d = 1.0$  g/mL, 360.0 mg, 20.0 mmol) in toluene (5 mL) afforded (*S*)-1b (73.6 mg, 34%) (44% NMR yield of (*S*)-2b was formed and 36% of (*S*)-1b remained) [eluent: petroleum ether / diethyl ether / DCM = 50/1/1 (260 mL), to 20/1/1 (440 mL), to 12/1/1 (350 mL), then petroleum ether/ethyl acetate = 5/1 (300 mL)]: 99% ee (HPLC conditions: AS-H column, hexane/*i*PrOH = 95/5, 0.9 mL/min,  $\lambda = 214$  nm,  $t_R$  (minor) = 5.3 min,  $t_R$  (major) = 6.4 min);  $[\alpha]_D^{21} = -3.8$  ( $c = 0.98$ , CHCl<sub>3</sub>); oil; <sup>1</sup>H NMR (400 MHz, CDCl<sub>3</sub>):  $\delta = 7.75$ -7.63 (m, 1 H, Ar-H), 7.22-7.13 (m, 3 H, Ar-H), 2.62 (s, 3 H, CH<sub>3</sub>), 2.36 (s, 1 H, OH), 2.23 (t,  $J = 7.0$  Hz, 2 H, CH<sub>2</sub>), 1.80 (s, 3 H, CH<sub>3</sub>), 1.57-1.45 (m, 2 H, CH<sub>2</sub>), 1.45-1.32 (m, 2 H, CH<sub>2</sub>), 0.90 (t,  $J = 7.2$  Hz, 3 H, CH<sub>3</sub>); <sup>13</sup>C NMR (100 MHz, CDCl<sub>3</sub>):  $\delta = 142.8, 135.6, 132.1, 127.4, 125.6, 124.9, 85.2, 84.0, 69.9, 31.1, 30.6, 22.0, 21.2, 18.4, 13.6$ ; IR (neat):  $\nu = 3428, 2930, 2866, 2243, 1454, 1369, 1325, 1051$  cm<sup>-1</sup>; MS (70 eV, EI)  $m/z$  (%): 216 (M<sup>+</sup>, 1.60), 201 (100); HRMS calcd. for C<sub>15</sub>H<sub>20</sub>O [M<sup>+</sup>]: 216.1514; Found: 216.1517.



### (3) Preparation of (*S*)-2-(3-methylphenyl)oct-3-yn-2-ol ((*S*)-1c)

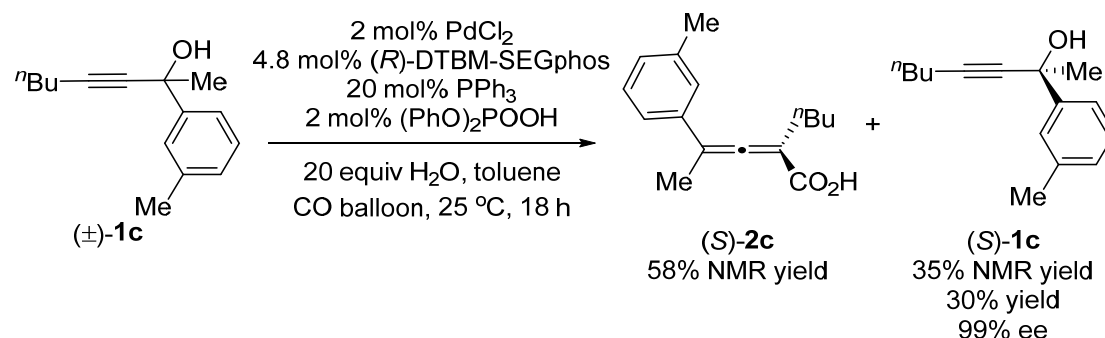

Following Typical Procedure, the reaction of PdCl<sub>2</sub> (3.8 mg, 0.02 mmol), (*R*)-DTBM-SEGphos (56.7 mg, 0.048 mmol), PPh<sub>3</sub> (52.6 mg, 0.2 mmol), (PhO)<sub>2</sub>POOH (5.1 mg, 0.02 mmol), (±)-1c (215.8 mg, 1.0 mmol), and H<sub>2</sub>O (360 μL, d = 1.0 g/mL, 360.0 mg, 20.0 mmol) in toluene (5 mL) afforded (*S*)-1c (63.9 mg, 30%) (58% NMR yield of (*S*)-2c was formed and 35% of (*S*)-1c remained) [eluent: petroleum ether / diethyl ether / DCM = 40/1/1 (1200 mL)]: 99% ee (HPLC conditions: AS-H column, hexane/*i*PrOH = 95/5, 1.3 mL/min, λ = 214 nm, *t*<sub>R</sub> (minor) = 3.5 min, *t*<sub>R</sub> (major) = 4.2 min); [α]<sub>D</sub><sup>26</sup> = +1.5 (*c* = 1.37, CHCl<sub>3</sub>); oil; <sup>1</sup>H NMR (400 MHz, CDCl<sub>3</sub>): δ = 7.50-7.40 (m, 2 H, Ar-H), 7.28-7.20 (m, 1 H, Ar-H), 7.09 (d, *J* = 7.2 Hz, 1 H, Ar-H), 2.37 (s, 3 H, CH<sub>3</sub>), 2.32-2.22 (m, 3 H, CH<sub>2</sub> and OH) 1.74 (s, 3 H, CH<sub>3</sub>), 1.58-1.50 (m, 2 H, CH<sub>2</sub>), 1.49-1.39 (m, 2 H, CH<sub>2</sub>), 0.93 (t, *J* = 7.2 Hz, 3 H, CH<sub>3</sub>); <sup>13</sup>C NMR (100 MHz, CDCl<sub>3</sub>): δ = 146.2, 137.8, 128.2, 128.1, 125.6, 122.0, 85.5, 83.9, 70.0, 33.5, 30.7, 21.9, 21.5, 18.4, 13.6; IR (neat): ν = 3390, 2958, 2930, 2863, 2242, 1607, 1458, 1325, 1198, 1083 cm<sup>-1</sup>; MS (70 eV, EI) *m/z* (%): 216 (M<sup>+</sup>, 2.67), 201 (100); HRMS: Calcd for C<sub>15</sub>H<sub>20</sub>O [M<sup>+</sup>]: 216.1514; Found: 216.1516.

### (4) Preparation of (*S*)-2-(4-methylphenyl)oct-3-yn-2-ol ((*S*)-1d)

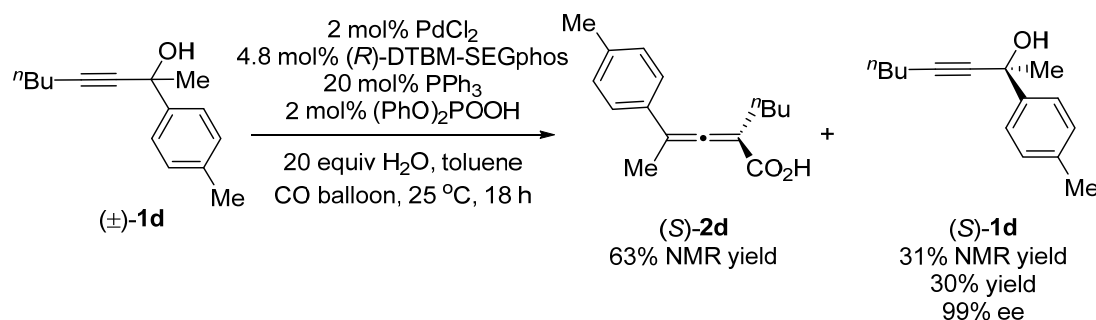

Following Typical Procedure, the reaction of PdCl<sub>2</sub> (3.7 mg, 0.02 mmol), (*R*)-DTBM-SEGphos (56.6 mg, 0.048 mmol), PPh<sub>3</sub> (52.3 mg, 0.2 mmol), (PhO)<sub>2</sub>POOH (5.0 mg, 0.02 mmol), (±)-**1d** (216.4 mg, 1.0 mmol), H<sub>2</sub>O (360 μL, d = 1.0 g/mL, 360.0 mg, 20.0 mmol), and toluene (5 mL) afforded (*S*)-**1d**<sup>4</sup> (64.7 mg, 30%) (63% NMR yield of (*S*)-**2d** was formed and 31% of (*S*)-**1d** remained) [eluent: petroleum ether / ethyl ether / dichloromethane = 30/1/1 (320 mL), then petroleum ether / ethyl acetate = 10/1 (320 mL)]: 99% ee (HPLC conditions: AS-H column, hexane/*i*PrOH = 98/2, 1.0 mL/min, λ = 214 nm, *t*<sub>R</sub> (minor) = 7.2 min, *t*<sub>R</sub> (major) = 9.7 min); [α]<sub>D</sub><sup>25</sup> = -1.4 (*c* = 1.17, CHCl<sub>3</sub>) [lit.<sup>6</sup> [α]<sub>D</sub><sup>23</sup> = -0.4 (*c* = 0.96, CHCl<sub>3</sub>)]; oil; <sup>1</sup>H NMR (400 MHz, CDCl<sub>3</sub>): δ = 7.53 (d, *J* = 8.4 Hz, 2 H, Ar-H), 7.15 (d, *J* = 8.0 Hz, 2 H, Ar-H), 2.40-2.30 (m, 4 H, OH and CH<sub>3</sub>), 2.27 (t, *J* = 7.2 Hz, 2 H, CH<sub>2</sub>), 1.72 (s, 3 H, CH<sub>3</sub>), 1.57-1.46 (m, 2 H, CH<sub>2</sub>), 1.46-1.35 (m, 2 H, CH<sub>2</sub>), 0.92 (t, *J* = 7.4 Hz, 3 H, CH<sub>3</sub>); <sup>13</sup>C NMR (100 MHz, CDCl<sub>3</sub>): δ = 143.4, 137.0, 128.8, 124.9, 85.3, 83.9, 69.8, 33.4, 30.7, 21.9, 20.9, 18.4, 13.5; IR (neat): ν = 3405, 2929, 2866, 2241, 1452, 1325, 1175, 1088 cm<sup>-1</sup>; MS (70 eV, EI) *m/z* (%): 217 (M<sup>+</sup>+1, 1.08), 216 (M<sup>+</sup>, 2.23), 201 (100).

### (5) Preparation of (*S*)-2-(3-methoxyphenyl)oct-3-yn-2-ol ((*S*)-**1e**)

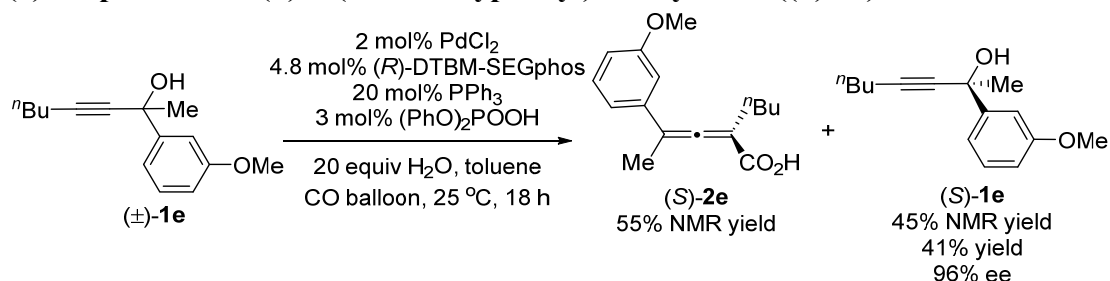

Following Typical Procedure, the reaction of PdCl<sub>2</sub> (3.7 mg, 0.02 mmol), (*R*)-DTBM-SEGphos (56.5 mg, 0.048 mmol), PPh<sub>3</sub> (52.7 mg, 0.2 mmol), (PhO)<sub>2</sub>POOH (8.0 mg, 0.03 mmol), (±)-**1e** (231.0 mg, 1.0 mmol), H<sub>2</sub>O (360 μL, d = 1.0 g/mL, 360.0 mg, 20.0 mmol), and toluene (5 mL) afforded (*S*)-**1e** (94.5 mg, 41%) (55% NMR yield of (*S*)-**2e** was formed and 45% of (*S*)-**1e** remained) [eluent: petroleum ether / ethyl ether / dichloromethane = 30/1/1 (320 mL), then petroleum ether / ethyl acetate = 10/1 (275 mL)]: 96% ee (HPLC conditions: AS-H column, hexane/*i*PrOH = 98/2, 1.0 mL/min, λ = 214 nm, *t*<sub>R</sub> (minor) = 12.1 min, *t*<sub>R</sub> (major) = 18.8 min); [α]<sub>D</sub><sup>26</sup> = +2.9 (*c* = 1.00, CHCl<sub>3</sub>); oil; <sup>1</sup>H NMR (400 MHz, CDCl<sub>3</sub>): δ = 7.32-7.14 (m, 3 H, Ar-H), 6.80 (dt, *J*<sub>1</sub> =

6.8 Hz,  $J_2 = 2.2$  Hz, 1 H, Ar-H), 3.80 (s, 3 H, OCH<sub>3</sub>), 2.57 (s, 1 H, OH), 2.26 (t,  $J = 7.2$  Hz, 2 H, CH<sub>2</sub>), 1.72 (s, 3 H, CH<sub>3</sub>), 1.58-1.47 (m, 2 H, CH<sub>2</sub>), 1.47-1.35 (m, 2 H, CH<sub>2</sub>), 0.92 (t,  $J = 7.2$  Hz, 3 H, CH<sub>3</sub>); <sup>13</sup>C NMR (100 MHz, CDCl<sub>3</sub>):  $\delta = 159.3, 148.0, 129.1, 117.3, 112.9, 110.7, 85.4, 83.7, 69.8, 55.1, 33.4, 30.6, 21.9, 18.3, 13.5$ ; IR (neat):  $\nu = 3431, 2932, 2240, 1596, 1480, 1432, 1254, 1041$  cm<sup>-1</sup>; MS (70 eV, EI)  $m/z$  (%): 233 ( $M^+ + 1$ , 4.22), 232 ( $M^+$ , 25.23), 217 (100); HRMS calcd for C<sub>15</sub>H<sub>20</sub>O<sub>2</sub> [ $M^+$ ]: 232.1463, found: 232.1466.

### (6) Preparation of (*S*)-2-(4-chlorophenyl)oct-3-yn-2-ol ((*S*)-1f)

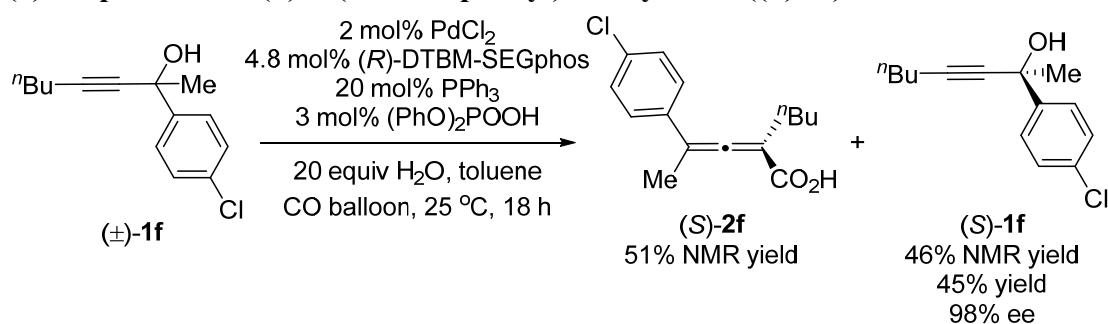

Following Typical Procedure, the reaction of PdCl<sub>2</sub> (3.6 mg, 0.02 mmol), (*R*)-DTBM-SEGphos (56.6 mg, 0.048 mmol), PPh<sub>3</sub> (52.5 mg, 0.2 mmol), (PhO)<sub>2</sub>POOH (7.8 mg, 0.03 mmol), ( $\pm$ )-1f (235.0 mg, 1.0 mmol), H<sub>2</sub>O (360  $\mu$ L,  $d = 1.0$  g/mL, 360.0 mg, 20.0 mmol), and toluene (5 mL) afforded (*S*)-1f<sup>4</sup> (106.3 mg, 45%) (51% NMR yield of (*S*)-2f was formed and 46% of (*S*)-1f remained) [eluent: petroleum ether / ethyl ether / dichloromethane = 30/1/1 (320 mL), then petroleum ether / ethyl acetate = 15/1 (320 mL)]: 98% ee (HPLC conditions: AS-H column, hexane/<sup>*i*</sup>PrOH = 98/2, 1.0 mL/min,  $\lambda = 214$  nm,  $t_R$  (minor) = 7.2 min,  $t_R$  (major) = 9.8 min);  $[\alpha]_D^{24} = -0.6$  ( $c = 1.00$ , CHCl<sub>3</sub>) [lit.<sup>6</sup>  $[\alpha]_D^{20} = -0.6$  ( $c = 1.20$ , CHCl<sub>3</sub>)]; oil; <sup>1</sup>H NMR (400 MHz, CDCl<sub>3</sub>):  $\delta = 7.56$  (d,  $J = 8.8$  Hz, 2 H, Ar-H), 7.29 (d,  $J = 8.8$  Hz, 2 H, Ar-H), 2.58 (s, 1 H, OH), 2.25 (t,  $J = 7.0$  Hz, 2 H, CH<sub>2</sub>), 1.70 (s, 3 H, CH<sub>3</sub>), 1.58-1.47 (m, 2 H, CH<sub>2</sub>), 1.47-1.34 (m, 2 H, CH<sub>2</sub>), 0.92 (t,  $J = 7.2$  Hz, 3 H, CH<sub>3</sub>); <sup>13</sup>C NMR (100 MHz, CDCl<sub>3</sub>):  $\delta = 144.8, 133.2, 128.2, 126.5, 85.9, 83.3, 69.5, 33.6, 30.6, 21.9, 18.3, 13.5$ ; IR (neat):  $\nu = 3371, 2931, 2240, 1486, 1364, 1228, 1088$  cm<sup>-1</sup>; MS (70 eV, EI)  $m/z$  (%): 238 ( $M^+$ (<sup>37</sup>Cl), 0.52), 236 ( $M^+$ (<sup>35</sup>Cl), 1.65), 221 (100).

### (7) Preparation of (*S*)-2-(4-bromophenyl)oct-3-yn-2-ol ((*S*)-1g)

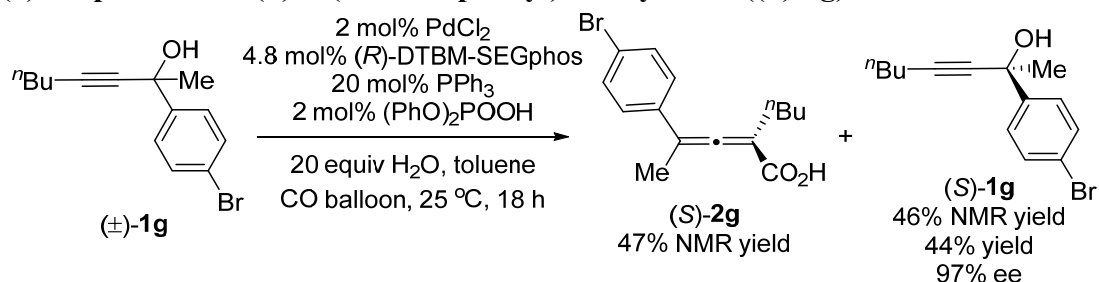

Following Typical Procedure, the reaction of PdCl<sub>2</sub> (3.6 mg, 0.02 mmol), (*R*)-DTBM-SEGphos (57.8 mg, 0.048 mmol), PPh<sub>3</sub> (52.5 mg, 0.2 mmol), (PhO)<sub>2</sub>POOH (5.1 mg, 0.02 mmol), (±)-1g (281.3 mg, 1.0 mmol), H<sub>2</sub>O (360 μL, d = 1.0 g/mL, 360.0 mg, 20.0 mmol), and toluene (5 mL) afforded (*S*)-1g (123.1 mg, 44%) (47% NMR yield of (*S*)-2g was formed and 46% of (*S*)-1g remained) [eluent: petroleum ether / ethyl ether / dichloromethane = 30/1/1 (~320 mL), to petroleum ether / ethyl ether / dichloromethane = 20/1/1 (~220 mL), then petroleum ether/ethyl acetate = 5/1 (~240 mL)]: 97% ee (HPLC conditions: AS-H column, hexane/*i*PrOH = 98/2, 1.0 mL/min, λ = 214 nm, *t*<sub>R</sub> (minor) = 8.5 min, *t*<sub>R</sub> (major) = 11.3 min); [α]<sub>D</sub><sup>25</sup> = -1.1 (c = 0.99, CHCl<sub>3</sub>); oil; <sup>1</sup>H NMR (400 MHz, CDCl<sub>3</sub>): δ = 7.52 (d, *J* = 8.8 Hz, 2 H, Ar-H), 7.46 (d, *J* = 8.0 Hz, 2 H, Ar-H), 2.37 (s, 1 H, OH), 2.26 (t, *J* = 7.2 Hz, 2 H, CH<sub>2</sub>), 1.71 (s, 3 H, CH<sub>3</sub>), 1.59-1.48 (m, 2 H, CH<sub>2</sub>), 1.48-1.35 (m, 2 H, CH<sub>2</sub>), 0.92 (t, *J* = 7.4 Hz, 3 H, CH<sub>3</sub>); <sup>13</sup>C NMR (100 MHz, CDCl<sub>3</sub>): δ = 145.3, 131.2, 126.9, 121.4, 86.0, 83.2, 69.6, 33.6, 30.6, 21.9, 18.3, 13.5; IR (neat): ν = 3379, 2957, 2930, 2862, 2240, 1750, 1485, 1394, 1074, 1009 cm<sup>-1</sup>; MS (70 eV, EI) *m/z* (%): 282 (M<sup>+</sup>(<sup>81</sup>Br), 2.75), 280 (M<sup>+</sup>(<sup>79</sup>Br), 2.58), 265 (100); HRMS calcd for C<sub>14</sub>H<sub>17</sub>O<sup>79</sup>Br [M<sup>+</sup>]: 280.0463, found: 280.0464.

### (8) Preparation of (*S*)-2-(2-naphthyl)oct-3-yn-2-ol ((*S*)-1h)

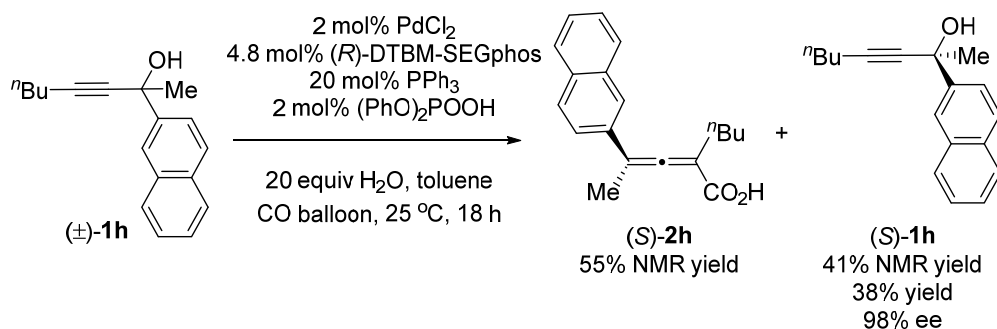

Following Typical Procedure, the reaction of PdCl<sub>2</sub> (3.6 mg, 0.02 mmol), (*R*)-

DTBM-SEGphos (57.9 mg, 0.048 mmol), PPh<sub>3</sub> (52.6 mg, 0.2 mmol), (PhO)<sub>2</sub>POOH (5.0 mg, 0.02 mmol), (±)-**1h** (252.3 mg, 1.0 mmol), H<sub>2</sub>O (360 μL, d = 1.0 g/mL, 360.0 mg, 20.0 mmol), and toluene (5 mL) afforded (*S*)-**1h**<sup>4</sup> (95.9 mg, 38%) (55% NMR yield of (*S*)-**2h** was formed and 41% of (*S*)-**1h** remained) [eluent: petroleum ether / ethyl ether / dichloromethane = 20/1/1 (500 mL) to 10/1/ (500 mL), then petroleum ether / ethyl acetate = 5/1 (200 mL)]: 98% ee (HPLC conditions: AS-H column, hexane/*i*PrOH = 95/5, 1.3 mL/min, λ = 214 nm, *t*<sub>R</sub> (minor) = 4.9 min, *t*<sub>R</sub> (major) = 5.7 min); [α]<sub>D</sub><sup>26</sup> = -11.5 (*c* = 1.15, CHCl<sub>3</sub>) [lit.<sup>6</sup> [α]<sub>D</sub><sup>23</sup> = -11.8 (*c* = 1.55, CHCl<sub>3</sub>)]; oil; <sup>1</sup>H NMR (400 MHz, CDCl<sub>3</sub>): δ = 8.12 (s, 1 H, Ar-H), 7.90-7.78 (m, 3 H, Ar-H), 7.74 (dd, *J*<sub>1</sub> = 8.4 Hz, *J*<sub>2</sub> = 1.6 Hz, 1 H, Ar-H), 7.52-7.43 (m, 2 H, Ar-H), 2.45-2.38 (m, 1 H, OH), 2.32 (t, *J* = 7.0 Hz, 2 H, CH<sub>2</sub>), 1.83 (s, 3 H, CH<sub>3</sub>), 1.62-1.52 (m, 2 H, CH<sub>2</sub>), 1.52-1.41 (m, 2 H, CH<sub>2</sub>), 0.94 (t, *J* = 7.2 Hz, 3 H, CH<sub>3</sub>); <sup>13</sup>C NMR (100 MHz, CDCl<sub>3</sub>): δ = 143.5, 133.0, 132.8, 128.3, 128.0, 127.5, 126.1, 126.0, 123.7, 123.3, 85.9, 83.7, 70.1, 33.4, 30.7, 22.0, 18.4, 13.6; IR (neat): ν = 3390, 2957, 2931, 2241, 1353, 1127, 1084 cm<sup>-1</sup>; MS (70 eV, EI) *m/z* (%): 253 (M<sup>+</sup>+1, 4.68), 252 (M<sup>+</sup>, 22.51), 237 (100).

### (9) Preparation of (*S*)-2-(thiophen-3-yl)oct-3-yn-2-ol ((*S*)-**1i**)

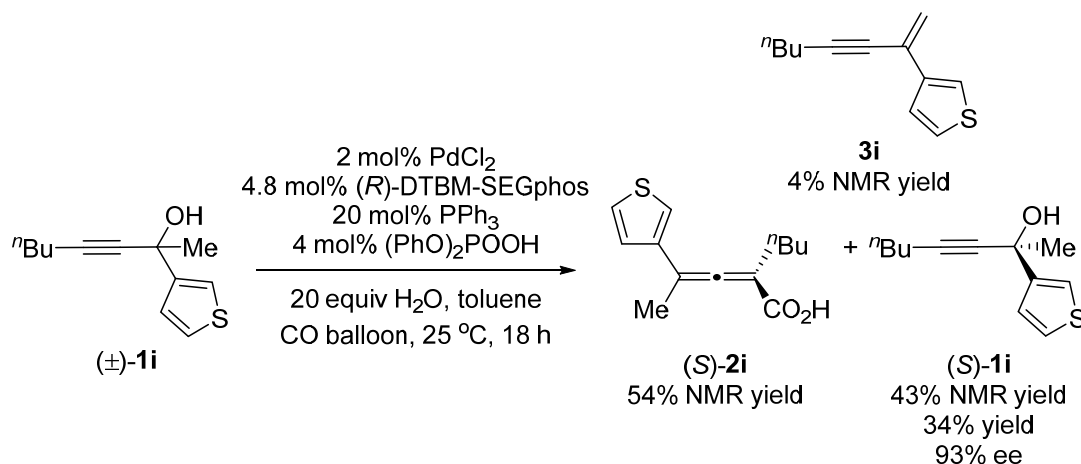

Following Typical Procedure, the reaction of PdCl<sub>2</sub> (3.6 mg, 0.02 mmol), (*R*)-DTBM-SEGphos (57.0 mg, 0.048 mmol), PPh<sub>3</sub> (52.5 mg, 0.2 mmol), (PhO)<sub>2</sub>POOH (10.1 mg, 0.04 mmol), (±)-**1i** (207.7 mg, 1.0 mmol), H<sub>2</sub>O (360 μL, d = 1.0 g/mL, 360.0 mg, 20.0 mmol) in toluene (5 mL) afforded (*S*)-**1i** (70.1 mg, 34%) (54% NMR yield of (*S*)-**2i**, 4% NMR yield of **3i** were formed and 43% of (*S*)-**1i** remained) [eluent:

petroleum ether / diethyl ether / DCM = 30/1/1 (320 mL), then petroleum ether / ethyl acetate = 8/1 (270 mL)]: 93% ee (HPLC conditions: AS-H column, hexane/<sup>i</sup>PrOH = 98/2, 1.0 mL/min,  $\lambda$  = 214 nm,  $t_R$  (minor) = 8.7 min,  $t_R$  (major) = 12.1 min);  $[\alpha]_D^{28}$  = -6.9 ( $c$  = 1.00, CHCl<sub>3</sub>); oil; <sup>1</sup>H NMR (400 MHz, CDCl<sub>3</sub>):  $\delta$  = 7.41-7.31 (m, 1 H, one proton from thienyl), 7.30-7.22 (m, 1 H, one proton from thienyl), 7.22-7.14 (m, 1 H, one proton from thienyl), 2.62-2.48 (m, 1 H, OH), 2.25 (t,  $J$  = 6.8 Hz, 2 H, CH<sub>2</sub>), 1.75 (s, 3 H, CH<sub>3</sub>), 1.57-1.34 (m, 4 H, 2 x CH<sub>2</sub>), 0.92 (t,  $J$  = 7.0 Hz, 3 H, CH<sub>3</sub>); <sup>13</sup>C NMR (100 MHz, CDCl<sub>3</sub>):  $\delta$  = 147.9, 125.9, 125.7, 120.5, 84.7, 83.6, 67.3, 32.3, 30.6, 21.9, 18.3, 13.5; IR (neat):  $\nu$  = 3387, 2932, 2244, 1461, 1365, 1228, 1158, 1087 cm<sup>-1</sup>; MS (70 eV, EI)  $m/z$  (%): 208 (M<sup>+</sup>, 4.20), 193 (100); HRMS calcd for C<sub>12</sub>H<sub>17</sub>OS [M+H]<sup>+</sup>: 209.0995, found: 209.1000.

#### (10) Preparation of (S)-2,2,3-trimethylnon-4-yn-3-ol ((S)-1j)

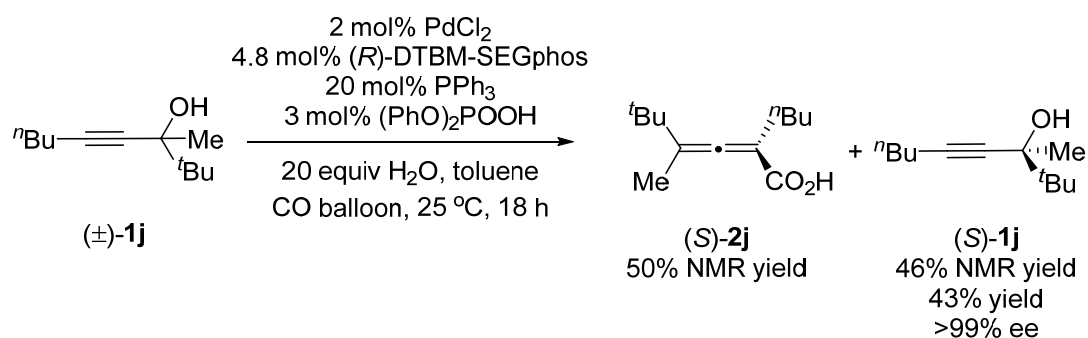

Following Typical Procedure, the reaction of PdCl<sub>2</sub> (3.6 mg, 0.02 mmol), (R)-DTBM-SEGphos (57.0 mg, 0.048 mmol), PPh<sub>3</sub> (52.6 mg, 0.2 mmol), (PhO)<sub>2</sub>POOH (7.6 mg, 0.03 mmol), (±)-1j (181.8 mg, 1.0 mmol), H<sub>2</sub>O (360  $\mu$ L,  $d$  = 1.0 g/mL, 360.0 mg, 20.0 mmol) in toluene (5 mL) afforded (S)-1j (77.4 mg, 43%) (50% NMR yield of (S)-2j was formed and 46% of (S)-1j remained) [eluent: petroleum ether / diethyl ether / DCM = 30/1/1 (320 mL), then petroleum ether / ethyl acetate = 5/1 (480 mL)]: >99% ee (HPLC conditions: IC column, hexane/<sup>i</sup>PrOH = 98/2, 1.0 mL/min,  $\lambda$  = 214 nm,  $t_R$  (major) = 4.7 min);  $[\alpha]_D^{27}$  = +3.9 ( $c$  = 1.07, CHCl<sub>3</sub>); oil; <sup>1</sup>H NMR (400 MHz, CDCl<sub>3</sub>):  $\delta$  = 2.20 (t,  $J$  = 6.8 Hz, 2 H, CH<sub>2</sub>), 1.82 (s, 1 H, OH), 1.54-1.34 (m, 7 H, 2 x CH<sub>2</sub> and CH<sub>3</sub>), 1.03 (s, 9 H, 3 x CH<sub>3</sub>), 0.91 (t,  $J$  = 7.2 Hz, 3 H, CH<sub>3</sub>); <sup>13</sup>C NMR (100 MHz, CDCl<sub>3</sub>):  $\delta$  = 84.2, 83.7, 74.0, 38.2, 30.8, 25.1, 25.0, 21.9, 18.3, 13.6; IR (neat):  $\nu$  = 3470,

2960, 2242, 1460, 1367, 1324, 1087  $\text{cm}^{-1}$ ; **MS** (ESI)  $m/z$  (%): 183 ( $\text{M}+\text{H}^+$ ), 165 ( $\text{M}-\text{OH}^+$ ); **HRMS** calcd for  $\text{C}_{12}\text{H}_{23}\text{O}$  [ $\text{M}+\text{H}^+$ ]: 183.1743, found: 183.1742.

### (11) Preparation of (*S*)-2-phenylnon-3-yn-2-ol ((*S*)-1k)

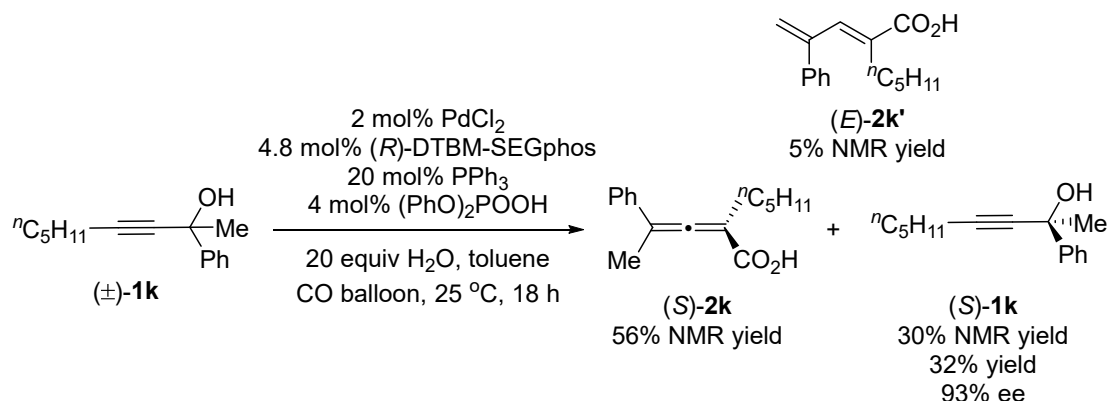

Following Typical Procedure, the reaction of  $\text{PdCl}_2$  (3.8 mg, 0.02 mmol), (*R*)-DTBM-SEGphos (56.5 mg, 0.048 mmol),  $\text{PPh}_3$  (52.5 mg, 0.2 mmol),  $(\text{PhO})_2\text{POOH}$  (9.8 mg, 0.04 mmol), ( $\pm$ )-**1k** (214.7 mg, 1.0 mmol),  $\text{H}_2\text{O}$  (360  $\mu\text{L}$ ,  $d = 1.0 \text{ g/mL}$ , 360.0 mg, 20.0 mmol), and toluene (5 mL) afforded (*S*)-**1k** (68.6 mg, 32%) (56% NMR yield of (*S*)-**2k**, 5% NMR yield of (*E*)-**2k'** were formed and 30% of (*S*)-**1k** remained) [eluent: petroleum ether / ethyl ether / dichloromethane = 30/1/1 (320 mL), then petroleum ether / ethyl acetate = 10/1 (330 mL)]: 93% ee (HPLC conditions: AS-H column, hexane/*i*PrOH = 98/2, 1.0 mL/min,  $\lambda = 214 \text{ nm}$ ,  $t_{\text{R}}$  (minor) = 6.8 min,  $t_{\text{R}}$  (major) = 9.9 min);  $[\alpha]_{\text{D}}^{26} = +9.2$  ( $c = 1.09$ ,  $\text{CHCl}_3$ ); oil;  **$^1\text{H NMR}$**  (400 MHz,  $\text{CDCl}_3$ ):  $\delta = 7.64$  (d,  $J = 6.8 \text{ Hz}$ , 2 H, Ar-H), 7.33 (t,  $J = 7.2 \text{ Hz}$ , 2 H, Ar-H), 7.29-7.21 (m, 1 H, Ar-H), 2.56 (s, 1 H, OH), 2.25 (t,  $J = 7.0 \text{ Hz}$ , 2 H,  $\text{CH}_2$ ), 1.73 (s, 3 H,  $\text{CH}_3$ ), 1.60-1.47 (m, 2 H,  $\text{CH}_2$ ), 1.45-1.24 (m, 4 H, 2 x  $\text{CH}_2$ ), 0.90 (t,  $J = 7.0 \text{ Hz}$ , 3 H,  $\text{CH}_3$ );  **$^{13}\text{C NMR}$**  (100 MHz,  $\text{CDCl}_3$ ):  $\delta = 146.2, 128.0, 127.3, 124.9, 85.6, 83.7, 69.9, 33.5, 31.0, 28.2, 22.1, 18.6, 13.9$ ; **IR** (neat):  $\nu = 3420, 2929, 2861, 2240, 1754, 1448, 1329, 1230, 1059 \text{ cm}^{-1}$ ; **MS** (70 eV, EI)  $m/z$  (%): 216 ( $\text{M}^+$ , 1.24), 201 (100); **HRMS** calcd for  $\text{C}_{15}\text{H}_{20}\text{O}$  [ $\text{M}^+$ ]: 216.1514, found: 216.1511.

### (12) Preparation of (*S*)-2-phenyldec-3-yn-2-ol ((*S*)-1l)

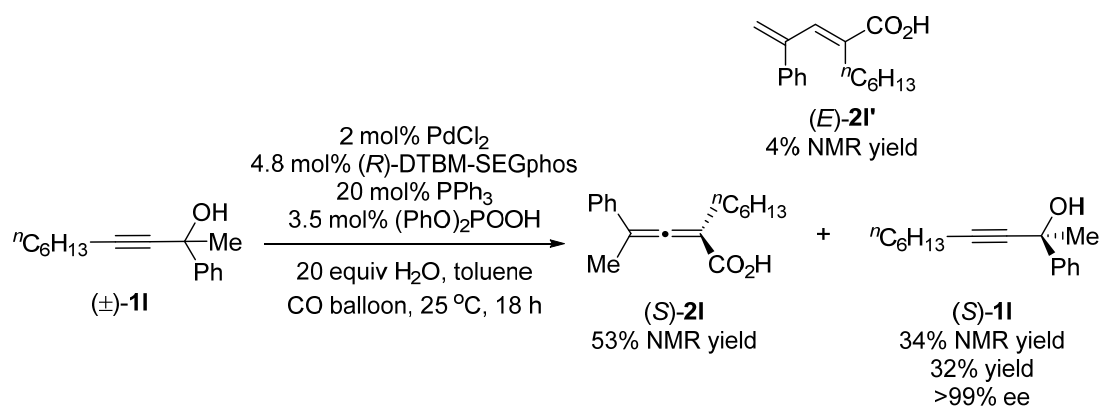

Following Typical Procedure, the reaction of PdCl<sub>2</sub> (3.7 mg, 0.02 mmol), (R)-DTBM-SEGphos (56.8 mg, 0.048 mmol), PPh<sub>3</sub> (52.3 mg, 0.2 mmol), (PhO)<sub>2</sub>POOH (8.8 mg, 0.035 mmol), (±)-**11** (229.7 mg, 1.0 mmol), H<sub>2</sub>O (360 μL, d = 1.0 g/mL, 360.0 mg, 20.0 mmol), and toluene (5 mL) afforded (S)-**11** (73.7 mg, 32%) (53% NMR yield of (S)-**2I**, 4% NMR yield of (E)-**2I'** were formed and 34% of (S)-**11** remained) [eluent: petroleum ether / ethyl ether / dichloromethane = 30/1/1 (320 mL), then petroleum ether / ethyl acetate = 8/1 (360 mL)]: >99% ee (HPLC conditions: AS-H column, hexane/<sup>i</sup>PrOH = 98/2, 1.0 mL/min, λ = 214 nm, t<sub>R</sub> (major) = 8.0 min); [α]<sub>D</sub><sup>26</sup> = -1.9 (c = 1.10, CHCl<sub>3</sub>); oil; <sup>1</sup>H NMR (400 MHz, CDCl<sub>3</sub>): δ = 7.65 (d, J = 7.2 Hz, 2 H, Ar-H), 7.33 (t, J = 7.4 Hz, 2 H, Ar-H), 7.29-7.20 (m, 1 H, Ar-H), 2.53-2.37 (m, 1 H, OH), 2.26 (t, J = 7.0 Hz, 2 H, CH<sub>2</sub>), 1.73 (s, 3 H, CH<sub>3</sub>), 1.58-1.48 (m, 2 H, CH<sub>2</sub>), 1.47-1.35 (m, 2 H, CH<sub>2</sub>), 1.35-1.19 (m, 4 H, 2 x CH<sub>2</sub>), 0.89 (t, J = 6.6 Hz, 3 H, CH<sub>3</sub>); <sup>13</sup>C NMR (100 MHz, CDCl<sub>3</sub>): δ = 146.2, 128.1, 127.4, 124.9, 85.6, 83.8, 70.0, 33.5, 31.2, 28.6, 28.5, 22.5, 18.7, 14.0; IR (neat): ν = 3396, 2929, 2858, 2242, 1447, 1329, 1232, 1060 cm<sup>-1</sup>; MS (70 eV, EI) m/z (%): 230 (M<sup>+</sup>, 1.20), 215 (100); HRMS calcd for C<sub>16</sub>H<sub>22</sub>O [M<sup>+</sup>]: 230.1671, found: 230.1668.

### (13) Preparation of (S)-7-methyl-2-phenyloct-3-yn-2-ol ((S)-**1m**)



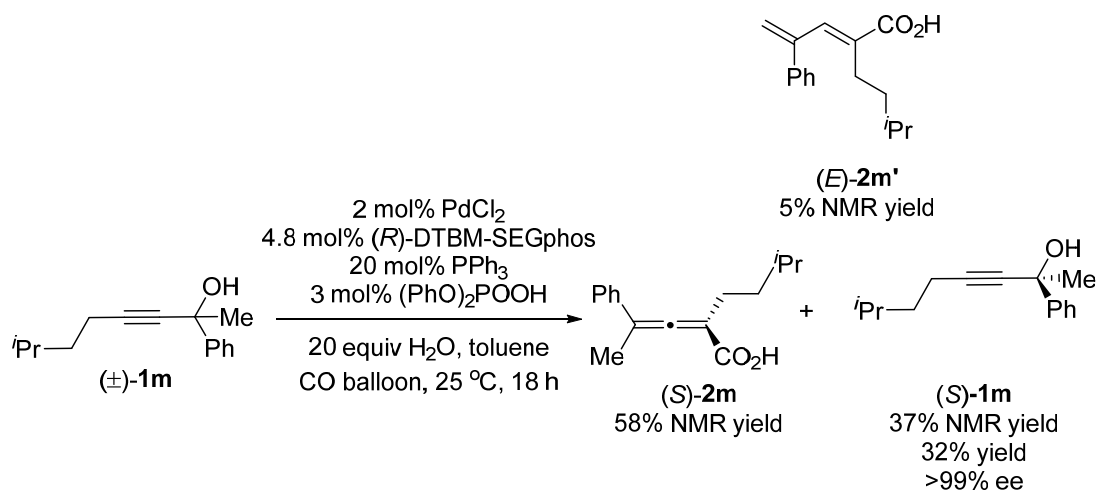

Following Typical Procedure, the reaction of PdCl<sub>2</sub> (3.8 mg, 0.02 mmol), (*R*)-DTBM-SEGphos (56.8 mg, 0.048 mmol), PPh<sub>3</sub> (52.5 mg, 0.2 mmol), (PhO)<sub>2</sub>POOH (7.7 mg, 0.03 mmol), (±)-**1m** (215.5 mg, 1.0 mmol), H<sub>2</sub>O (360 μL, d = 1.0 g/mL, 360.0 mg, 20.0 mmol), and toluene (5 mL) afforded (*S*)-**1m** (69.1 mg, 32%) (58% NMR yield of (*S*)-**2m**, 5% (*E*)-**2m'** were formed and 37% of (*S*)-**1m** remained) [eluent: petroleum ether / ethyl ether / dichloromethane = 30/1/1 (320 mL), then petroleum ether / ethyl acetate = 15/1 (320 mL)]: >99% ee (HPLC conditions: AS-H column, hexane/*i*PrOH = 98/2, 1.0 mL/min, λ = 214 nm, *t*<sub>R</sub> (minor) = 6.3 min, *t*<sub>R</sub> (major) = 9.9 min); [α]<sub>D</sub><sup>26</sup> = +4.2 (*c* = 1.00, CHCl<sub>3</sub>); oil; <sup>1</sup>H NMR (400 MHz, CDCl<sub>3</sub>): δ = 7.64 (d, *J* = 7.2 Hz, 2 H, Ar-H), 7.33 (t, *J* = 7.4 Hz, 2 H, Ar-H), 7.29-7.20 (m, 1 H, Ar-H), 2.60 (s, 1 H, OH), 2.26 (t, *J* = 7.6 Hz, 2 H, CH<sub>2</sub>), 1.80-1.62 (m, 4 H, CH and CH<sub>3</sub>), 1.44 (q, *J* = 7.3 Hz, 2 H, CH<sub>2</sub>), 0.90 (d, *J* = 6.4 Hz, 6 H, 2 x CH<sub>3</sub>); <sup>13</sup>C NMR (100 MHz, CDCl<sub>3</sub>): δ = 146.2, 128.1, 127.3, 124.9, 85.6, 83.6, 69.9, 37.5, 33.5, 27.2, 22.1, 16.7; IR (neat): ν = 3396, 2953, 2240, 1450, 1365, 1230, 1061 cm<sup>-1</sup>; MS (70 eV, EI) *m/z* (%): 216 (M<sup>+</sup>, 1.00), 201 (100); HRMS calcd for C<sub>15</sub>H<sub>20</sub>O [M<sup>+</sup>]: 216.1514, found: 216.1516.

#### (14) Preparation of (*S*)-8-chloro-2-phenyloct-3-yn-2-ol ((*S*)-**1n**)

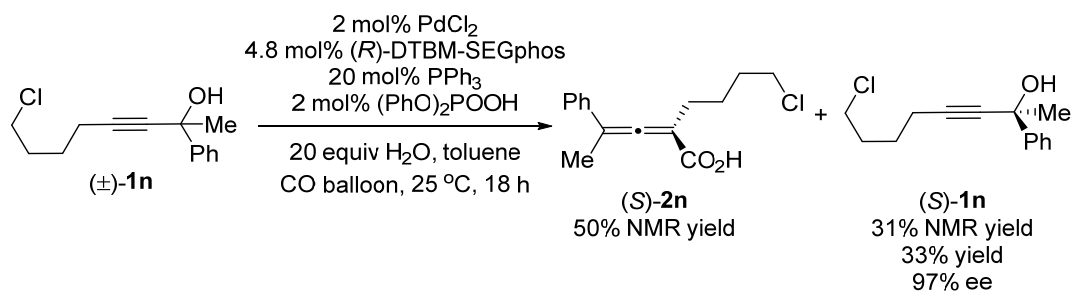

Following Typical Procedure, the reaction of PdCl<sub>2</sub> (3.6 mg, 0.02 mmol), (*R*)-DTBM-SEGphos (56.5 mg, 0.048 mmol), PPh<sub>3</sub> (52.6 mg, 0.2 mmol), (PhO)<sub>2</sub>POOH (5.3 mg, 0.02 mmol), (±)-**1n** (234.9 mg, 1.0 mmol), H<sub>2</sub>O (360 μL, d = 1.0 g/mL, 360.0 mg, 20.0 mmol), and toluene (5 mL) afforded (*S*)-**1n**<sup>4</sup> (77.7 mg, 33%) (50% NMR yield of (*S*)-**2n** was formed and 31% of (*S*)-**1n** remained) [eluent: petroleum ether / ethyl ether / dichloromethane = 30/1/1 (320 mL), then petroleum ether / ethyl acetate = 10/1 (330 mL)]: 97% ee (HPLC conditions: AS-H column, hexane/*i*PrOH = 95/5, 1.3 mL/min, λ = 214 nm, *t*<sub>R</sub> (minor) = 6.7 min, *t*<sub>R</sub> (major) = 11.0 min); [α]<sub>D</sub><sup>25</sup> = +1.6 (*c* = 1.20, CHCl<sub>3</sub>) [lit.<sup>6</sup> [α]<sub>D</sub><sup>24</sup> = +0.7 (*c* = 1.69, CHCl<sub>3</sub>)]; oil; <sup>1</sup>H NMR (400 MHz, CDCl<sub>3</sub>): δ = 7.68-7.60 (m, 2 H, Ar-H), 7.36 (t, *J* = 7.4 Hz, 2 H, Ar-H), 7.32-7.22 (m, 1 H, Ar-H), 3.57 (t, *J* = 6.6 Hz, 2 H, CH<sub>2</sub>), 2.38-2.28 (m, 3 H, OH and CH<sub>2</sub>), 1.96-1.85 (m, 2 H, CH<sub>2</sub>), 1.78-1.66 (m, 5 H, CH<sub>2</sub> and CH<sub>3</sub>); <sup>13</sup>C NMR (100 MHz, CDCl<sub>3</sub>): δ = 146.0, 128.2, 127.5, 124.9, 84.6, 84.5, 70.0, 44.5, 33.4, 31.6, 25.7, 18.0; IR (neat): ν = 3410, 2938, 2239, 1444, 1325, 1230, 1062 cm<sup>-1</sup>; MS (ESI) *m/z*: 237 (M(<sup>37</sup>Cl)+H<sup>+</sup>), 221 (M(<sup>37</sup>Cl)-OH)<sup>+</sup>, 219 (M(<sup>35</sup>Cl)-OH)<sup>+</sup>.

#### (15) Preparation of (*S*)-2,6-diphenylhex-3-yn-2-ol ((*S*)-**1o**)

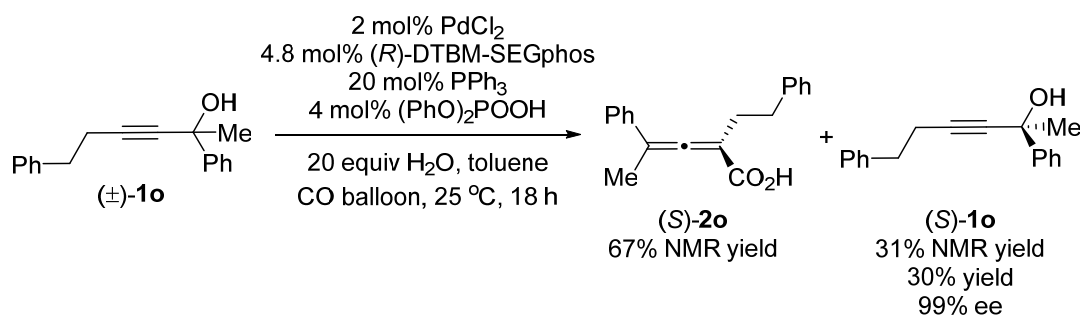

Following Typical Procedure, the reaction of PdCl<sub>2</sub> (3.7 mg, 0.02 mmol), (*R*)-DTBM-SEGphos (56.6 mg, 0.048 mmol), PPh<sub>3</sub> (52.7 mg, 0.2 mmol), (PhO)<sub>2</sub>POOH (9.8 mg, 0.04 mmol), (±)-**1o** (247.3 mg, 1.0 mmol), H<sub>2</sub>O (360 μL, d = 1.0 g/mL, 360.0 mg, 20.0 mmol), and toluene (5 mL) afforded (*S*)-**1o** (74.1 mg, 30%) (67% NMR yield of (*S*)-**2o** was formed and 31% of (*S*)-**1o** remained) [eluent: petroleum ether / ethyl ether / dichloromethane = 30/1/1 (320 mL), then petroleum ether / ethyl acetate = 10/1 (220 mL)]: 99% ee (HPLC conditions: AS-H column, hexane/*i*PrOH = 98/2, 1.0 mL/min, λ = 214 nm, *t*<sub>R</sub> (minor) = 12.8 min, *t*<sub>R</sub> (major) = 16.3 min); [α]<sub>D</sub><sup>25</sup> = -0.8 (*c* = 1.50, CHCl<sub>3</sub>);

oil;  $^1\text{H NMR}$  (400 MHz,  $\text{CDCl}_3$ ):  $\delta = 7.54$  (d,  $J = 7.6$  Hz, 2 H, Ar-H), 7.38-7.07 (m, 8 H, Ar-H), 2.82 (t,  $J = 7.6$  Hz, 2 H,  $\text{CH}_2$ ), 2.60-2.43 (m, 3 H, OH and  $\text{CH}_2$ ), 1.69 (s, 3 H,  $\text{CH}_3$ );  $^{13}\text{C NMR}$  (100 MHz,  $\text{CDCl}_3$ ):  $\delta = 145.9, 140.4, 128.5, 128.3, 128.0, 127.3, 126.2, 124.9, 84.64, 84.59, 69.8, 34.8, 33.3, 20.8$ ; **IR** (neat):  $\nu = 3409, 2984, 2241, 1492, 1446, 1331, 1229, 1064$   $\text{cm}^{-1}$ ; **MS** (70 eV, EI)  $m/z$  (%): 250 ( $\text{M}^+$ , 1.65), 91 (100); **HRMS** calcd for  $\text{C}_{18}\text{H}_{18}\text{O}$  [ $\text{M}^+$ ]: 250.1358, found: 250.1361.

### (16) Preparation of (*S*)-7-cyano-2-phenylhept-3-yn-2-ol ((*S*)-1p)

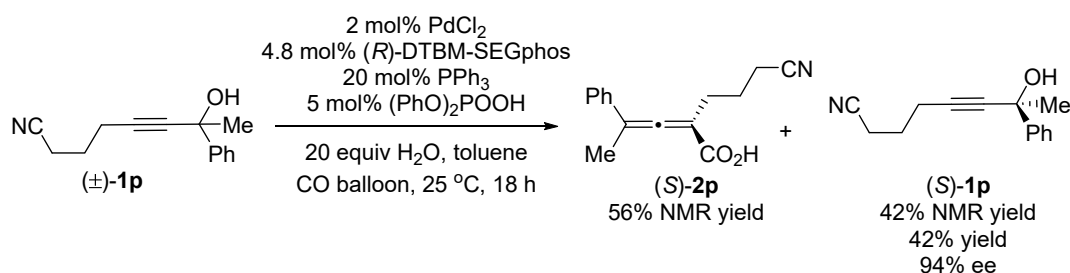

Following Typical Procedure, the reaction of  $\text{PdCl}_2$  (3.8 mg, 0.02 mmol), (*R*)-DTBM-SEGphos (56.5 mg, 0.048 mmol),  $\text{PPh}_3$  (52.6 mg, 0.2 mmol),  $(\text{PhO})_2\text{POOH}$  (12.7 mg, 0.05 mmol), ( $\pm$ )-**1p** (211.7 mg, 1.0 mmol),  $\text{H}_2\text{O}$  (360  $\mu\text{L}$ ,  $d = 1.0$  g/mL, 360.0 mg, 20.0 mmol), and toluene (5 mL) afforded (*S*)-**1p** (88.9 mg, 42%) (56% NMR yield of (*S*)-**2p** was formed and 42% of (*S*)-**1p** remained) [eluent: petroleum ether / diethyl ether / DCM = 20/1/1 (220 mL) to 10/1/1 (480 mL), then petroleum ether / ethyl acetate = 5/1 (480 mL)]: 94% ee (HPLC conditions: Daicel Chiralpak AS-H column, hexane/*i*PrOH = 90/10, 1.3 mL/min,  $\lambda = 214$  nm,  $t_R$  (minor) = 13.4 min,  $t_R$  (major) = 24.4 min);  $[\alpha]_D^{26} = +0.9$  ( $c = 1.00$ ,  $\text{CHCl}_3$ ); oil;  $^1\text{H NMR}$  (400 MHz,  $\text{CDCl}_3$ ):  $\delta = 7.61$  (d,  $J = 8.0$  Hz, 2 H, Ar-H), 7.35 (t,  $J = 7.6$  Hz, 2 H, Ar-H), 7.31-7.23 (m, 1 H, Ar-H), 2.66 (br, 1 H, OH), 2.46 (q,  $J = 6.8$  Hz, 4 H, 2 x  $\text{CH}_2$ ), 1.88 (quintet,  $J = 7.0$  Hz, 2 H,  $\text{CH}_2$ ), 1.74 (s, 3 H,  $\text{CH}_3$ );  $^{13}\text{C NMR}$  (100 MHz,  $\text{CDCl}_3$ ):  $\delta = 145.7, 128.2, 127.5, 124.7, 119.1, 85.9, 82.2, 69.8, 33.3, 24.3, 17.8, 16.1$ ; **IR** (neat):  $\nu = 3439, 2982, 2931, 2248, 1491, 1361, 1229, 1172, 1095, 1064, 1027$   $\text{cm}^{-1}$ ; **MS** (70 eV, EI)  $m/z$  (%): 213 ( $\text{M}^+$ , 1.19), 198 (100); **HRMS** calcd for  $\text{C}_{14}\text{H}_{15}\text{NO}$  [ $\text{M}^+$ ]: 213.1154, found: 213.1158.

### (17) Preparation of (*S*)-2-phenylhept-6-en-3-yn-2-ol ((*S*)-1q)

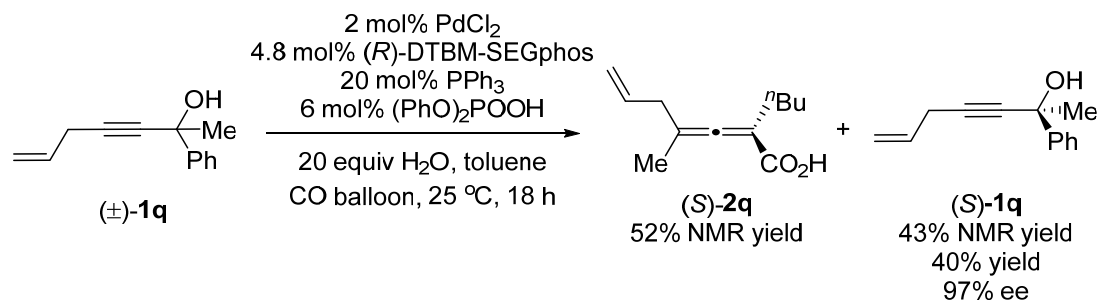

Following Typical Procedure, the reaction of PdCl<sub>2</sub> (3.6 mg, 0.02 mmol), (*R*)-DTBM-SEGphos (56.9 mg, 0.048 mmol), PPh<sub>3</sub> (52.4 mg, 0.2 mmol), (PhO)<sub>2</sub>POOH (15.0 mg, 0.06 mmol), (±)-**1q** (186.1 mg, 1.0 mmol), H<sub>2</sub>O (360 μL, d = 1.0 g/mL, 360.0 mg, 20.0 mmol), and toluene (5 mL) afforded (*S*)-**1q** (74.1 mg, 40%) (53% NMR yield of (*S*)-**2q** was formed and 43% of (*S*)-**1q** remained) [eluent: petroleum ether / ethyl ether / dichloromethane = 30/1/1 (320 mL) to 20/1/1 (220 mL)]: 97% ee (HPLC conditions: AS-H column, hexane/*i*PrOH = 98/2, 1.0 mL/min, λ = 214 nm, *t*<sub>R</sub> (minor) = 9.5 min, *t*<sub>R</sub> (major) = 12.3 min); [α]<sub>D</sub><sup>28</sup> = +1.4 (c = 1.37, CHCl<sub>3</sub>); oil; **<sup>1</sup>H NMR** (400 MHz, CDCl<sub>3</sub>): δ = 7.65 (d, *J* = 7.2 Hz, 2 H, Ar-H), 7.34 (t, *J* = 7.6 Hz, 2 H, Ar-H), 7.30-7.24 (m, 1 H, Ar-H), 5.92-5.75 (m, 1 H, =CH), 5.34 (dd, *J*<sub>1</sub> = 17.2 Hz, *J*<sub>2</sub> = 1.6 Hz, 1 H, one proton of =CH<sub>2</sub>), 5.11 (dd, *J*<sub>1</sub> = 9.2 Hz, *J*<sub>2</sub> = 1.6 Hz, 1 H, one proton of =CH<sub>2</sub>), 3.05 (dt, *J*<sub>1</sub> = 5.2 Hz, *J*<sub>2</sub> = 1.8 Hz, 2 H, CH<sub>2</sub>), 2.58-2.50 (m, 1 H, OH), 1.76 (s, 3 H, CH<sub>3</sub>); **<sup>13</sup>C NMR** (100 MHz, CDCl<sub>3</sub>): δ = 145.9, 132.3, 128.2, 127.5, 124.9, 116.2, 86.2, 81.9, 70.0, 33.4, 23.0; **IR** (neat): ν = 3389, 2984, 2244, 1641, 1446, 1325, 1230, 1061 cm<sup>-1</sup>; **MS** (70 eV, EI) *m/z* (%) 186 (M<sup>+</sup>, 1.53), 171 (100); **HRMS** calcd for C<sub>13</sub>H<sub>14</sub>O [M<sup>+</sup>]: 186.1045, found: 186.1046.

### (18) Preparation of (*S*)-3-(2-methylphenyl)oct-4-yn-3-ol ((*S*)-**1r**)

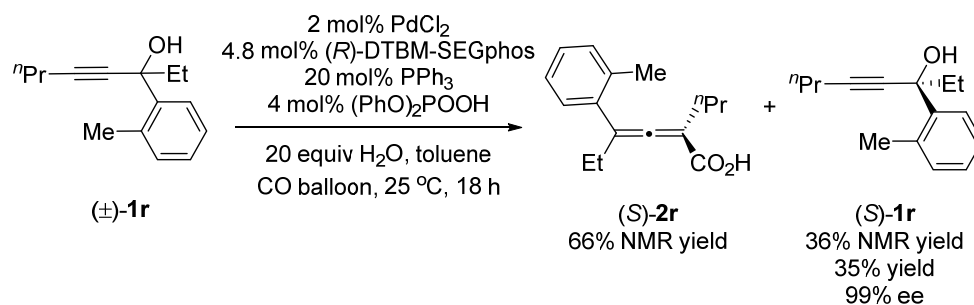

Following Typical Procedure, the reaction of PdCl<sub>2</sub> (3.6 mg, 0.02 mmol), (*R*)-

DTBM-SEGphos (57.0 mg, 0.048 mmol), PPh<sub>3</sub> (52.4 mg, 0.2 mmol), (PhO)<sub>2</sub>POOH (10.0 mg, 0.04 mmol), (±)-**1r** (216.1 mg, 1.0 mmol), H<sub>2</sub>O (360 μL, d = 1.0 g/mL, 360.0 mg, 20.0 mmol) in toluene (5 mL) afforded (*S*)-**1r** (75.0 mg, 35%) (66% NMR yield of (*S*)-**2r** was formed and 36% of (*S*)-**1r** remained) [eluent: petroleum ether / diethyl ether / DCM = 30/1/1 (320 mL), then petroleum ether/ethyl acetate = 5/1 (480 mL)]: 99% ee (HPLC conditions: AS-H column, hexane/<sup>i</sup>PrOH = 98/2, 1.0 mL/min, λ = 214 nm, *t*<sub>R</sub> (minor) = 5.1 min, *t*<sub>R</sub> (major) = 6.5 min); [α]<sub>D</sub><sup>26</sup> = +0.5 (c = 1.40, CHCl<sub>3</sub>); oil; <sup>1</sup>H NMR (400 MHz, CDCl<sub>3</sub>): δ = 7.72 (t, *J* = 4.4 Hz, 1 H, Ar-H), 7.23-7.08 (m, 3 H, Ar-H), 2.58 (s, 3 H, CH<sub>3</sub>), 2.30-2.17 (m, 3 H, CH<sub>2</sub> and OH), 2.10-1.88 (m, 2 H, CH<sub>2</sub>), 1.57 (sextet, *J* = 7.2 Hz, 2 H, CH<sub>2</sub>), 1.05-0.91 (m, 6 H, 2 x CH<sub>3</sub>); <sup>13</sup>C NMR (100 MHz, CDCl<sub>3</sub>): δ = 142.0, 135.4, 132.2, 127.3, 126.2, 125.4, 86.5, 83.1, 73.8, 35.3, 22.0, 21.3, 20.8, 13.6, 8.9; IR (neat): ν = 3453, 2964, 2933, 2873, 2236, 1456, 1328, 1161, 1050 cm<sup>-1</sup>; MS (ESI) *m/z*: 217 (M+H<sup>+</sup>), 199 (M-OH)<sup>+</sup>; HRMS calcd *m/z* for C<sub>15</sub>H<sub>20</sub>O [M<sup>+</sup>]: 216.1509, found: 216.1512.

### (19) Preparation of (*S*)-3-(2-methylphenyl)non-4-yn-3-ol ((*S*)-**1s**)

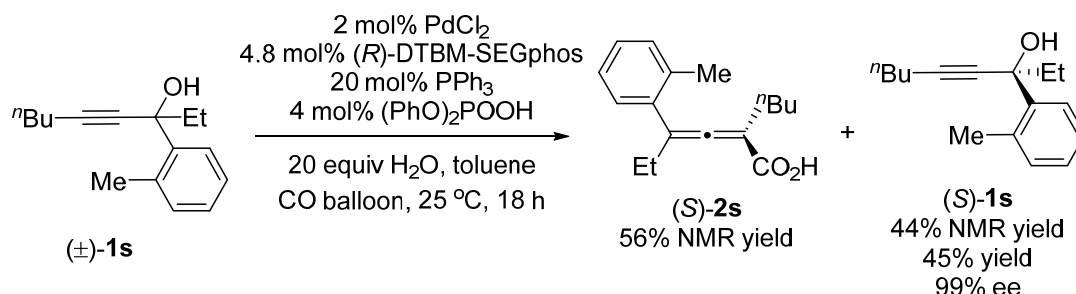

Following Typical Procedure, the reaction of PdCl<sub>2</sub> (3.7 mg, 0.02 mmol), (*R*)-DTBM-SEGphos (56.8 mg, 0.048 mmol), PPh<sub>3</sub> (52.4 mg, 0.2 mmol), (PhO)<sub>2</sub>POOH (10.2 mg, 0.04 mmol), (±)-**1s** (230.3 mg, 1.0 mmol), H<sub>2</sub>O (360 μL, d = 1.0 g/mL, 360.0 mg, 20.0 mmol), and toluene (5 mL) afforded (*S*)-**1s** (103.3 mg, 45%) (56% NMR yield of (*S*)-**2s** was formed and 44% of (*S*)-**1s** remained) [eluent: petroleum ether / ethyl ether / dichloromethane = 30/1/1 (320 mL), then petroleum ether / ethyl acetate = 8/1 (360 mL)]: 99% ee (HPLC conditions: AS-H column, hexane/<sup>i</sup>PrOH = 98/2, 1.0 mL/min, λ = 214 nm, *t*<sub>R</sub> (minor) = 5.1 min, *t*<sub>R</sub> (major) = 6.1 min); [α]<sub>D</sub><sup>28</sup> = -0.9 (c = 1.10, CHCl<sub>3</sub>);

oil;  $^1\text{H NMR}$  (400 MHz,  $\text{CDCl}_3$ ):  $\delta = 7.75\text{-}7.67$  (m, 1 H, Ar-H),  $7.20\text{-}7.09$  (m, 3 H, Ar-H),  $2.57$  (s, 3 H,  $\text{CH}_3$ ),  $2.32$  (br, 1 H, OH),  $2.26$  (t,  $J = 7.0$  Hz, 2 H,  $\text{CH}_2$ ),  $2.08\text{-}1.88$  (m, 2 H,  $\text{CH}_2$ ),  $1.57\text{-}1.47$  (m, 2 H,  $\text{CH}_2$ ),  $1.47\text{-}1.35$  (m, 2 H,  $\text{CH}_2$ ),  $0.98$  (t,  $J = 7.4$  Hz, 3 H,  $\text{CH}_3$ ),  $0.91$  (t,  $J = 7.2$  Hz, 3 H,  $\text{CH}_3$ );  $^{13}\text{C NMR}$  (100 MHz,  $\text{CDCl}_3$ ):  $\delta = 142.0, 135.4, 132.1, 127.3, 126.2, 125.4, 86.6, 82.9, 73.7, 35.2, 30.6, 22.0, 21.3, 18.4, 13.5, 8.9$ ; **IR** (neat):  $\nu = 3454, 2930, 2238, 1456, 1326, 1046$   $\text{cm}^{-1}$ ; **MS** (ESI)  $m/z$ : 231 ( $\text{M}+\text{H}^+$ ), 213 ( $\text{M}-\text{OH}$ ) $^+$ ; **HRMS** calcd for  $\text{C}_{16}\text{H}_{23}\text{O}$  [ $\text{M}+\text{H}^+$ ]: 231.1743, found: 231.1741.

### (20) Preparation of (*S*)-2-(naphthalen-2-yl)hept-3-yn-2-ol ((*S*)-1t)

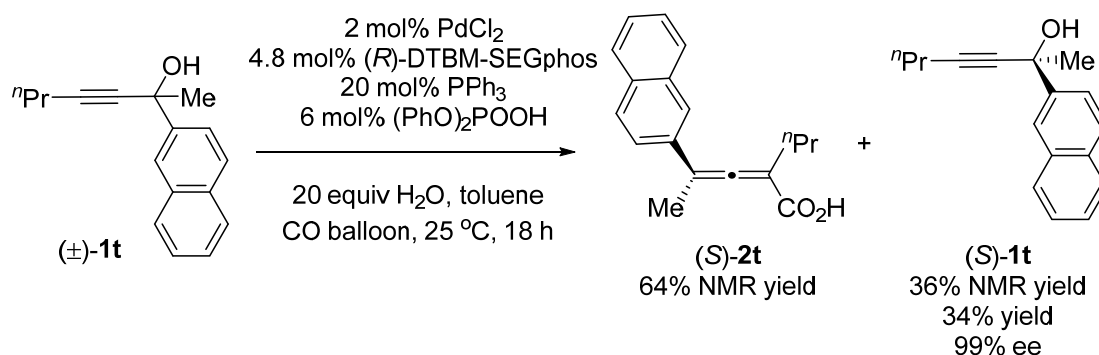

Following Typical Procedure, the reaction of  $\text{PdCl}_2$  (3.6 mg, 0.02 mmol), (*R*)-DTBM-SEGphos (57.1 mg, 0.048 mmol),  $\text{PPh}_3$  (52.3 mg, 0.2 mmol),  $(\text{PhO})_2\text{POOH}$  (15.0 mg, 0.06 mmol), ( $\pm$ )-**1t** (238.0 mg, 1.0 mmol),  $\text{H}_2\text{O}$  (360  $\mu\text{L}$ ,  $d = 1.0$  g/mL, 360.0 mg, 20.0 mmol), and toluene (5 mL) afforded (*S*)-**1t** (80.6 mg, 34%) (64% NMR yield of (*S*)-**2t** was formed and 36% of (*S*)-**1t** remained) [eluent: petroleum ether / ethyl ether / dichloromethane = 20/1/1 (1760 mL)]: 99% ee (HPLC conditions: AS-H column, hexane/*i*PrOH = 98/2, 1.0 mL/min,  $\lambda = 214$  nm,  $t_{\text{R}}$  (minor) = 12.1 min,  $t_{\text{R}}$  (major) = 15.8 min);  $[\alpha]_{\text{D}}^{29} = +6.2$  ( $c = 1.00$ ,  $\text{CHCl}_3$ ); oil;  $^1\text{H NMR}$  (400 MHz,  $\text{CDCl}_3$ ):  $\delta = 8.11$  (s, 1 H, Ar-H),  $7.88\text{-}7.76$  (m, 3 H, Ar-H),  $7.73$  (dd,  $J_1 = 8.6$  Hz,  $J_2 = 1.4$  Hz, 1 H, Ar-H),  $7.52\text{-}7.37$  (m, 2 H, Ar-H),  $2.62$  (s, 1 H, OH),  $2.26$  (t,  $J = 7.0$  Hz, 2 H,  $\text{CH}_2$ ),  $1.82$  (s, 3 H,  $\text{CH}_3$ ),  $1.64\text{-}1.49$  (m, 2 H,  $\text{CH}_2$ ),  $1.02$  (t,  $J = 7.4$  Hz, 3 H,  $\text{CH}_3$ );  $^{13}\text{C NMR}$  (100 MHz,  $\text{CDCl}_3$ ):  $\delta = 143.5, 133.0, 132.7, 128.2, 127.9, 127.5, 126.0, 125.9, 123.6, 123.2, 85.7, 84.0, 70.1, 33.3, 22.0, 20.7, 13.5$ ; **IR** (neat):  $\nu = 3418, 2964, 2931, 2871, 2240, 1752, 1358, 1085, 1052$   $\text{cm}^{-1}$ ; **MS** (70 eV, EI)  $m/z$  (%): 239 ( $\text{M}^++1$ , 5.39), 238 ( $\text{M}^+$ , 27.03), 223 (100); **HRMS** calcd  $m/z$  for  $\text{C}_{17}\text{H}_{18}\text{O}$  [ $\text{M}^+$ ]: 238.1352, found: 238.1354.

## (20) Preparation of (*S*)-2-(naphthalen-2-yl)hept-3-yn-2-ol ((*S*)-**1u**)

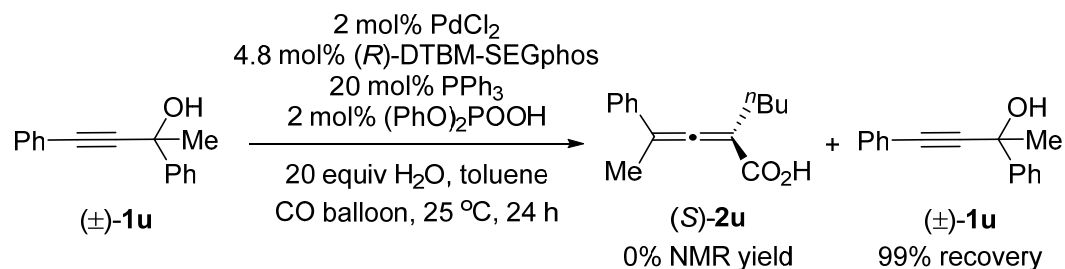

Following Typical Procedure, the reaction of PdCl<sub>2</sub> (3.6 mg, 0.02 mmol), (*R*)-DTBM-SEGphos (57.0 mg, 0.048 mmol), PPh<sub>3</sub> (52.7 mg, 0.2 mmol), (PhO)<sub>2</sub>POOH (5.0 mg, 0.02 mmol), ( $\pm$ )-**1u** (222.4 mg, 1.0 mmol)/toluene (3 mL), H<sub>2</sub>O (360  $\mu$ L, d = 1.0 g/mL, 360.0 mg, 20.0 mmol)/toluene (2 mL), no desired product was formed with 99% NMR yield of ( $\pm$ )-**1u** recovered.

## (22) Synthesis of 4-phenyldec-5-yn-4-ol (**2v**)

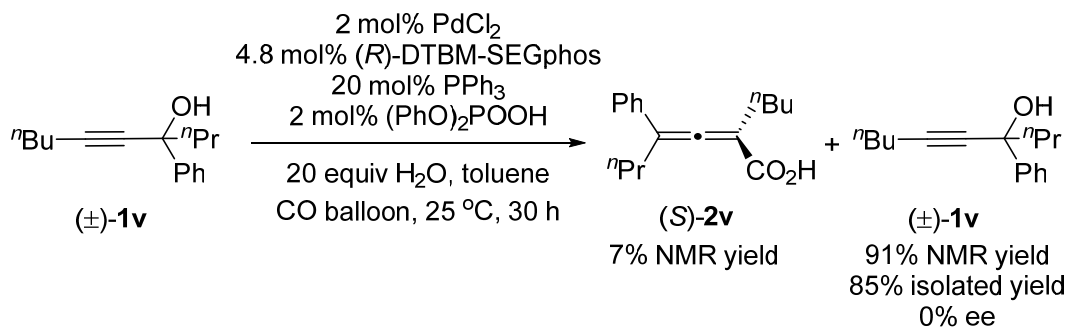

Following Typical Procedure, the reaction of PdCl<sub>2</sub> (3.7 mg, 0.02 mmol), (*R*)-DTBM-SEGphos (56.7 mg, 0.048 mmol), PPh<sub>3</sub> (52.5 mg, 0.2 mmol), and (PhO)<sub>2</sub>POOH (5.1 mg, 0.02 mmol), ( $\pm$ )-**1v** (230.1 mg, 1.0 mmol)/toluene (3 mL) and H<sub>2</sub>O (360  $\mu$ L, 20.0 mmol)/toluene (2 mL), recovered ( $\pm$ )-**1v** (195.4 mg, 85%) (7% NMR yield of (*S*)-**2v** was formed and 91% of ( $\pm$ )-**1v** remained) [eluent: petroleum ether / ethyl ether / dichloromethane = 30/1/1 (320 mL)]: 0% ee (HPLC conditions: AS-H column, hexane/*i*-PrOH = 98/2, 1.0 mL/min,  $\lambda$  = 214 nm,  $t_1$  = 5.3 min,  $t_2$  = 6.6 min); oil; <sup>1</sup>H NMR (400 MHz, CDCl<sub>3</sub>):  $\delta$  = 7.68-7.57 (m, 2 H, Ar-H), 7.39-7.31 (m, 2 H, Ar-H), 7.31-7.24 (m, 1 H, Ar-H), 2.38-2.22 (m, 3 H, CH<sub>2</sub> and OH), 1.96-1.73 (m, 2 H, CH<sub>2</sub>), 1.60-1.24 (m, 6 H, 3 x CH<sub>2</sub>), 0.93 (t,  $J$  = 7.2 Hz, 3 H, CH<sub>3</sub>), 0.88 (t,  $J$  = 7.6 Hz, 3 H, CH<sub>3</sub>); <sup>13</sup>C NMR (100 MHz, CDCl<sub>3</sub>):  $\delta$  = 145.4, 128.0, 127.4, 125.5, 86.7, 82.6, 73.4,

47.8, 30.8, 22.0, 18.4, 18.1, 14.0, 13.6.

## 2. Gram-scale reactions

### (1) Gram scale synthesis of (*S*)-2-phenyloct-3-yn-2-ol ((*S*)-**1a**)

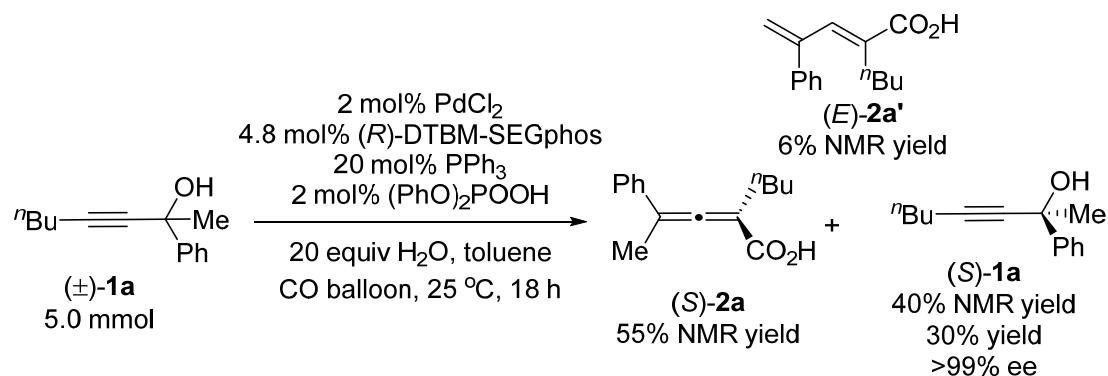

Following Typical Procedure, the reaction of PdCl<sub>2</sub> (17.8 mg, 0.1 mmol), (*R*)-DTBM-SEGphos (288.8 mg, 0.24 mmol), PPh<sub>3</sub> (262.1 mg, 1.0 mmol), and (PhO)<sub>2</sub>POOH (25.3 mg, 0.1 mmol), ( $\pm$ )-**1a** (1.0112 g, 5.0 mmol)/toluene (15 mL) and H<sub>2</sub>O (1.8051 g, 100.0 mmol)/toluene (10 mL), afforded **1a** (301.9 mg, 30%) (55% NMR yield of (*S*)-**2a** and 6% of (*E*)-**2a'** were formed and 40% of (*S*)-**1a** remained) [eluent: petroleum ether / ethyl ether / dichloromethane = 30/1/1 (1280 mL), 10/1/1 (1200 mL), then petroleum ether / ethyl acetate = 8/1 (900 mL)]: >99% ee (HPLC conditions: AS-H column, hexane/*i*PrOH = 98/2, 1.0 mL/min,  $\lambda$  = 214 nm,  $t_R$  (major) = 11.1 min); oil; <sup>1</sup>H NMR (400 MHz, CDCl<sub>3</sub>):  $\delta$  = 7.66 (d,  $J$  = 8.0 Hz, 2 H, Ar-H), 7.36 (t,  $J$  = 7.4 Hz, 2 H, Ar-H), 7.32-7.27 (m, 1 H, Ar-H), 2.35-2.20 (m, 3 H, OH and CH<sub>2</sub>), 1.74 (s, 3 H, CH<sub>3</sub>), 1.60-1.50 (m, 2 H, CH<sub>2</sub>), 1.50-1.35 (m, 2 H, CH<sub>2</sub>), 0.93 (t,  $J$  = 7.2 Hz, 3 H, CH<sub>3</sub>); <sup>13</sup>C NMR (100 MHz, CDCl<sub>3</sub>):  $\delta$  = 146.2, 128.1, 127.4, 124.9, 85.5, 83.7, 70.0, 33.5, 30.7, 21.9, 18.3, 13.5.

### (2) Gram scale synthesis of (*S*)-2-phenyloct-3-yn-2-ol ((*S*)-**1a**)



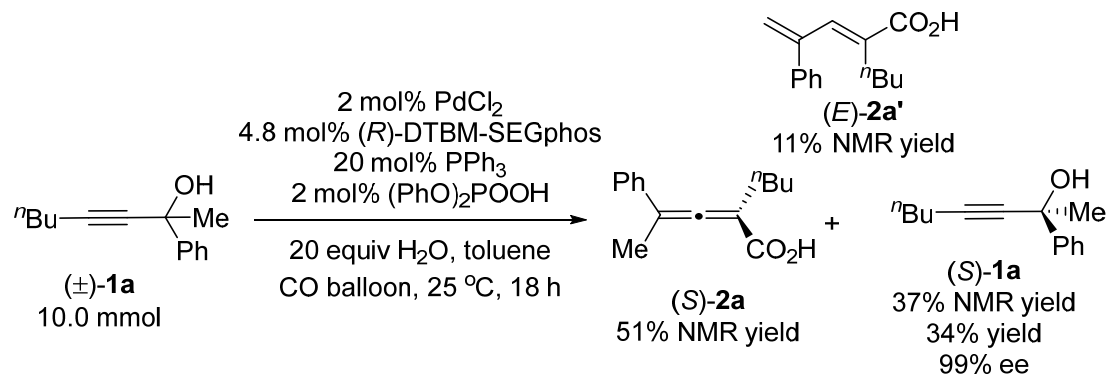

Following Typical Procedure, the reaction of  $\text{PdCl}_2$  (35.6 mg, 0.2 mmol), *(R)*-DTBM-SEGphos (577.9 mg, 0.48 mmol),  $\text{PPh}_3$  (524.9 mg, 2.0 mmol),  $(\text{PhO})_2\text{POOH}$  (50.1 mg, 0.2 mmol), **(±)-1a** (2.0234 g, 10.0 mmol),  $\text{H}_2\text{O}$  (3.6011 g, 200.0 mmol), and toluene (50 mL) afforded **(S)-1a** (684.5 mg, 34%) (51% NMR yield of **(S)-2a**, 11% **(E)-2a'** were formed and 37% of **(S)-1a** remained) [eluent: petroleum ether / ethyl ether / dichloromethane = 30/1/1 (1280 mL), 10/1/1 (1080 mL), then petroleum ether / ethyl acetate = 8/1 (1800 mL)]: 99% ee (HPLC conditions: AS-H column, hexane/*i*PrOH = 98/2, 1.0 mL/min,  $\lambda = 214 \text{ nm}$ ,  $t_R$  (minor) = 7.4 min,  $t_R$  (major) = 11.5 min); oil;  $^1\text{H NMR}$  (400 MHz,  $\text{CDCl}_3$ ):  $\delta = 7.65$  (d,  $J = 7.6 \text{ Hz}$ , 2 H, Ar-H), 7.35 (t,  $J = 7.4 \text{ Hz}$ , 2 H, Ar-H), 7.31-7.22 (m, 1 H, Ar-H), 2.45-2.15 (m, 3 H, OH and  $\text{CH}_2$ ), 1.74 (s, 3 H,  $\text{CH}_3$ ), 1.58-1.48 (m, 2 H,  $\text{CH}_2$ ), 1.48-1.36 (m, 2 H,  $\text{CH}_2$ ), 0.93 (t,  $J = 7.2 \text{ Hz}$ , 3 H,  $\text{CH}_3$ );  $^{13}\text{C NMR}$  (100 MHz,  $\text{CDCl}_3$ ):  $\delta = 146.2, 128.1, 127.4, 124.9, 85.5, 83.7, 70.0, 33.5, 30.7, 21.9, 18.3, 13.5$ .

### (3) Gram scale synthesis of *(S)*-2-phenyloct-3-yn-2-ol (**(S)-1a**)

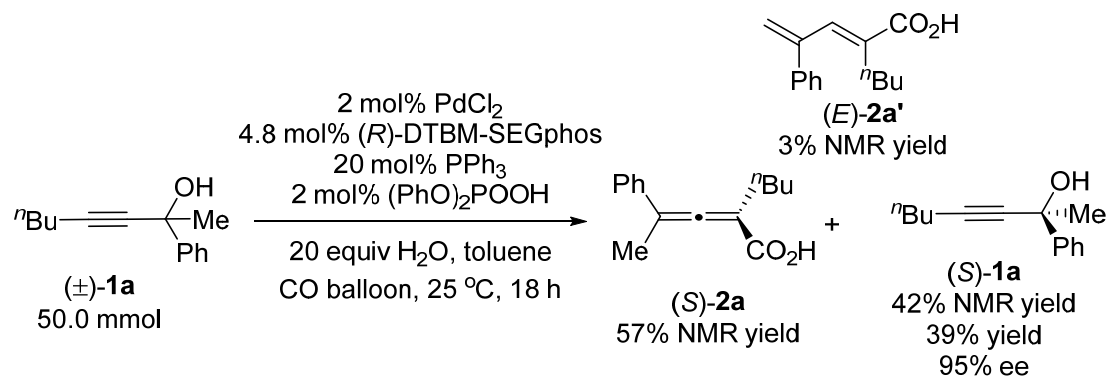

Following Typical Procedure, the reaction of  $\text{PdCl}_2$  (177.4 mg, 1.0 mmol), *(R)*-DTBM-SEGphos (2830.5 mg, 2.4 mmol),  $\text{PPh}_3$  (2630.2 mg, 10.0 mmol),  $(\text{PhO})_2\text{POOH}$

(250.4 mg, 1.0 mmol), ( $\pm$ )-**1a** (10.1141 g, 50.0 mmol), H<sub>2</sub>O (18 mL, 1000.0 mmol), and toluene (250 mL) afforded (*S*)-**1a** (3.9229 g, 39%) (57% NMR yield of (*S*)-**2a**, 3% (*E*)-**2a'** were formed and 42% of (*S*)-**1a** remained) [eluent: petroleum ether / ethyl ether / dichloromethane = 30/1/1 (4800 mL), then petroleum ether / ethyl acetate = 5/1 (1800 mL)]: 95% ee (HPLC conditions: AS-H column, hexane/*i*PrOH = 98/2, 1.0 mL/min,  $\lambda$  = 214 nm,  $t_R$ (minor) = 7.2 min,  $t_R$ (major) = 10.5 min); oil; <sup>1</sup>H NMR (400 MHz, CDCl<sub>3</sub>):  $\delta$  = 7.69-7.62 (m, 2 H, Ar-H), 7.39-7.32 (m, 2 H, Ar-H), 7.31-7.24 (m, 1 H, Ar-H), 2.35-2.23 (m, 3 H, OH and CH<sub>2</sub>), 1.74 (s, 3 H, CH<sub>3</sub>), 1.58-1.50 (m, 2 H, CH<sub>2</sub>), 1.50-1.38 (m, 2 H, CH<sub>2</sub>), 0.93 (t,  $J$  = 7.2 Hz, 3 H, CH<sub>3</sub>); <sup>13</sup>C NMR (100 MHz, CDCl<sub>3</sub>):  $\delta$  = 146.2, 128.2, 127.5, 124.9, 85.7, 83.7, 70.0, 33.5, 30.7, 22.0, 18.4, 13.6.

References:

1. W. Zhang, C. Huang, Y. Yuan and S. Ma, *Chem. Commun.*, 2017, **53**, 12430.
2. H. B. Kagan and J. C. Fiaud, *Top. Stereochem.* 1988, **18**, 249.
3. S. Kotani, K. Kukita, K. Tanaka, T. Ichibakase and M. Nakajima, *J. Org. Chem.*, 2014, **79**, 4817.
4. H.-L. Wu, P.-Y. Wu, Y.-Y. Shen and B.-J. Uang, *J. Org. Chem.*, 2008, **73**, 6445.
5. W.-F. Zheng, W. Zhang, J. Huang, Y. Yu, H. Qian and S. Ma, *Org. Chem. Front.*, 2018, **5**, 1900.
6. W. Zhang, and S. Ma, *Chem. Commun.*, 2018, **54**, 6064.

zwf-3-085-1H  
May 12 2018  
SOLVENT: cdcl3  
NA = 4  
F1 = 399.749542 MHz  
F2 = 100.526031 MHz

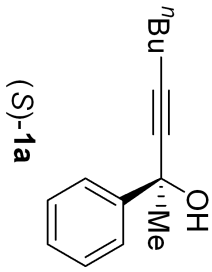

7.646  
7.628  
7.343  
7.324  
7.305  
7.267  
7.248  
7.230

2.641  
2.272  
2.254  
2.237  
1.555  
1.549  
1.519  
1.520  
1.502  
1.485  
1.466  
1.449  
1.430  
1.410  
1.393  
1.375  
0.933  
0.914  
0.897  
0.000

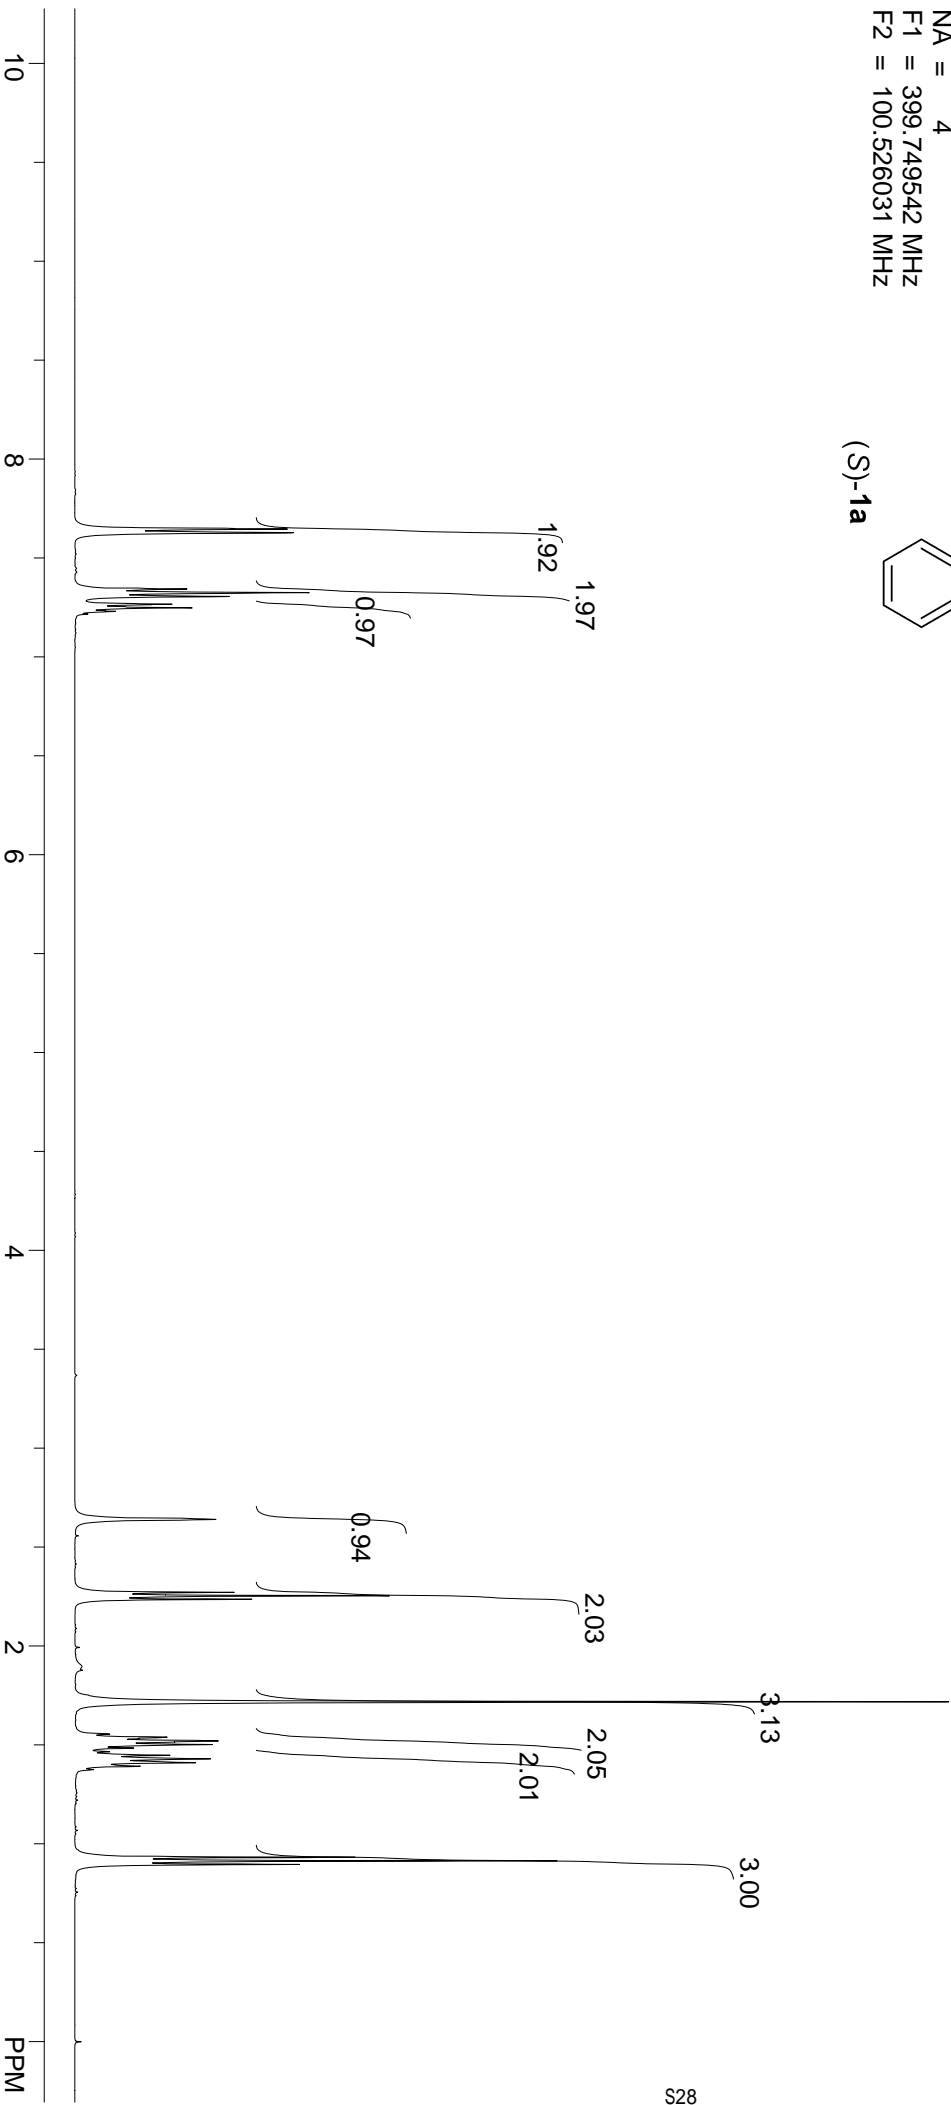

zwf-3-085-1C  
May 12 2018  
SOLVENT: cdcl3  
NA = 64  
F1 = 100.527557 MHz  
F2 = 399.749146 MHz

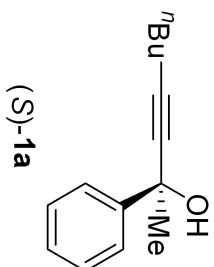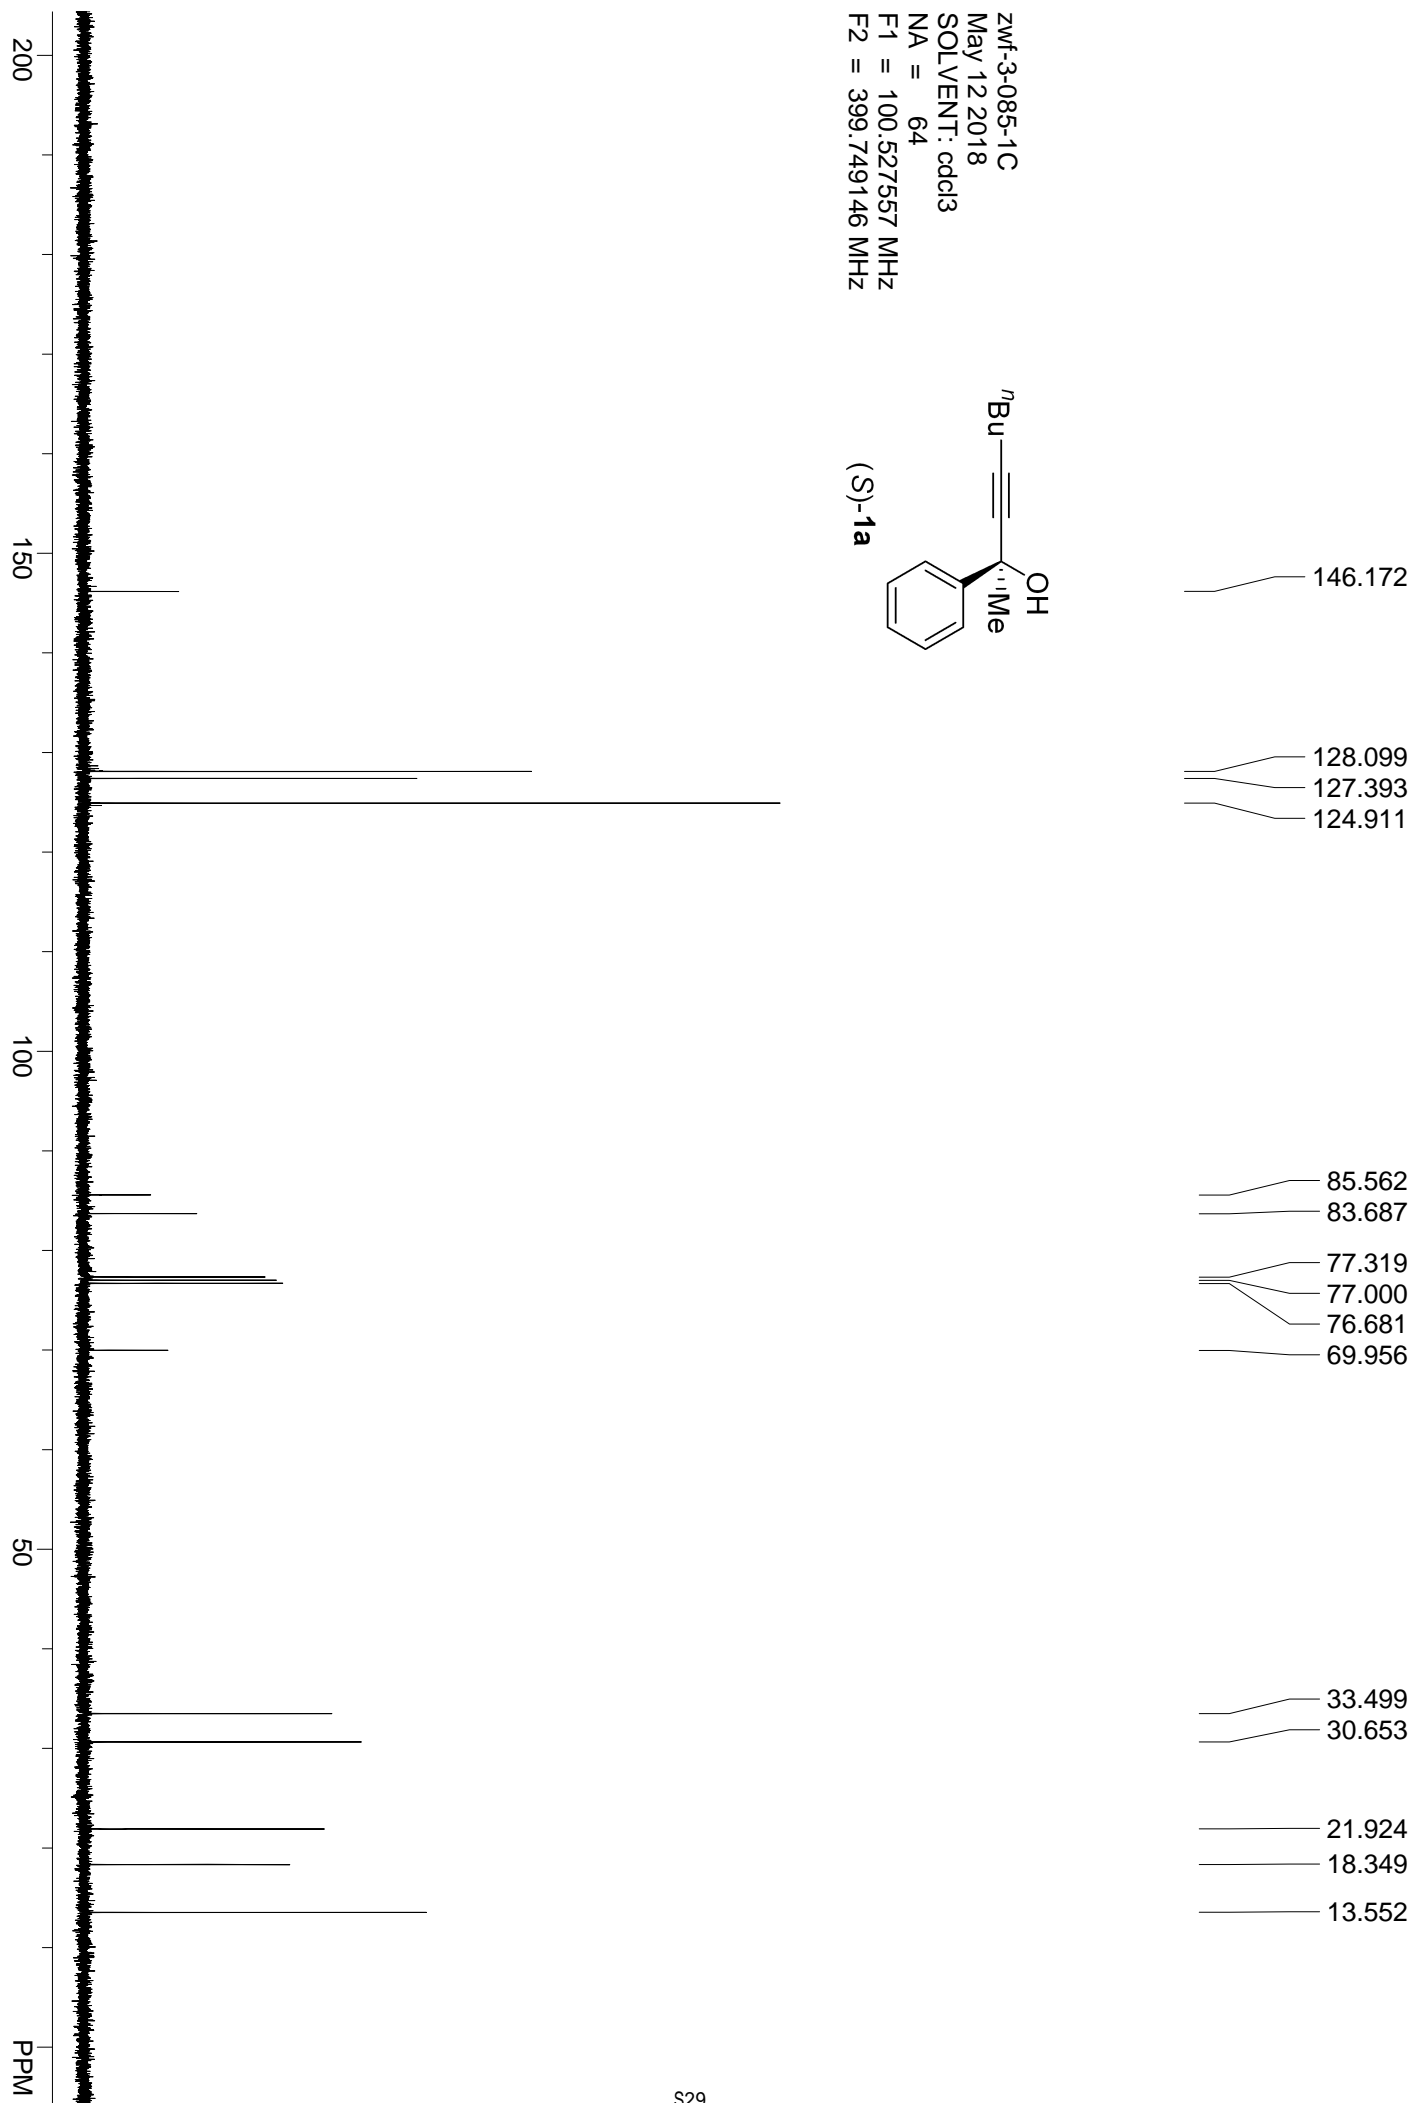

# zwf-3-085-1-AS-H-98-2-1.0-214

实验时间: 2018-05-11, 16:36:15

报告时间: 2018-05-11, 16:49:28

谱图文件: E:\data\zwf\zwf-3-085-1-AS-H-98-2-1.0-214-1.org

方法文件: E:\data\yaoyuan\0414.mtd

实验内容简介:

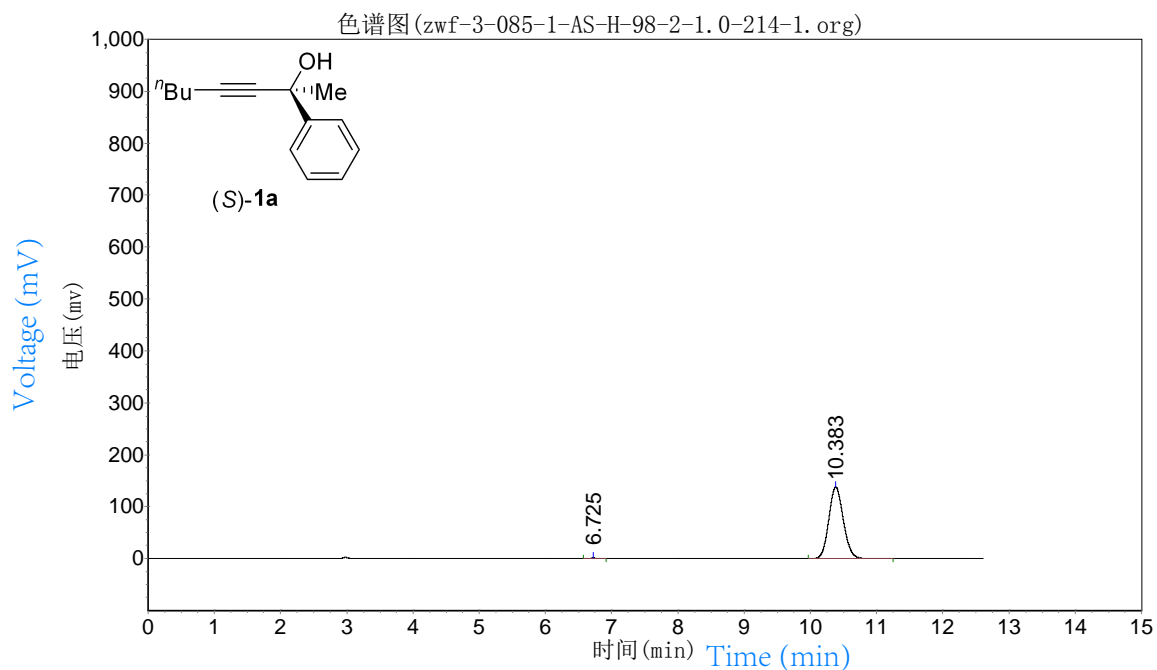

分析结果表

| 峰号 | 峰名 | 保留时间 RT [min] | 峰高 Height  | 峰面积 Area    | 含量 Area % |
|----|----|---------------|------------|-------------|-----------|
| 1  |    | 6.725         | 727.320    | 6189.300    | 0.2948    |
| 2  |    | 10.383        | 137487.203 | 2093043.500 | 99.7052   |
| 总计 |    |               | 138214.523 | 2099232.800 | 100.0000  |

# zwf-3-085-1-rac-AS-H-98-2-1.0-214

实验时间: 2018-05-11, 16:22:07

报告时间: 2018-05-11, 16:51:02

谱图文件: E:\data\zwf\zwf-3-085-1-rac-AS-H-98-2-1.0-214.org

方法文件: E:\data\yaoyuan\0414.mtd

实验内容简介:

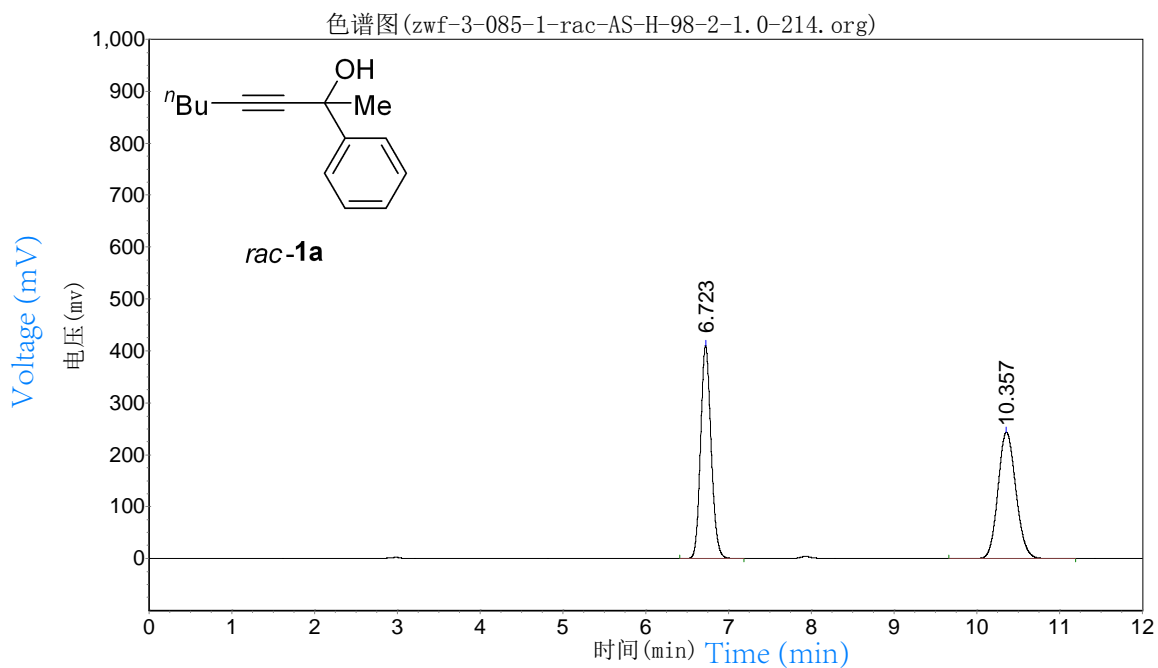

分析结果表

| 峰号 | 峰名 | 保留时间 RT [min] | 峰高 Height  | 峰面积 Area    | 含量 Area % |
|----|----|---------------|------------|-------------|-----------|
| 1  |    | 6.723         | 408952.281 | 3606936.000 | 49.7389   |
| 2  |    | 10.357        | 243358.859 | 3644801.750 | 50.2611   |
| 总计 |    |               | 652311.141 | 7251737.750 | 100.0000  |

7.702  
7.693  
7.685  
7.234  
7.189  
7.176  
7.167

2.357  
2.249  
2.616  
2.233  
2.214  
1.801  
1.670  
1.538  
1.522  
1.502  
1.485  
1.467  
1.445  
1.427  
1.409  
1.390  
1.371  
1.355  
0.922  
0.903  
0.886  
0.075  
0.000

ZY-3-154-1-H  
May 1 2018  
NA = 4  
Solvent = cdcl3  
F1 = 399.749542 MHz  
F2 = 100.526031 MHz

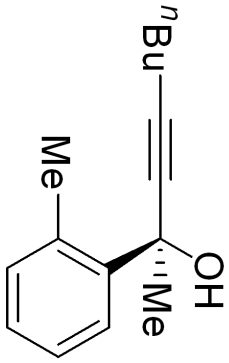

(S)-1b

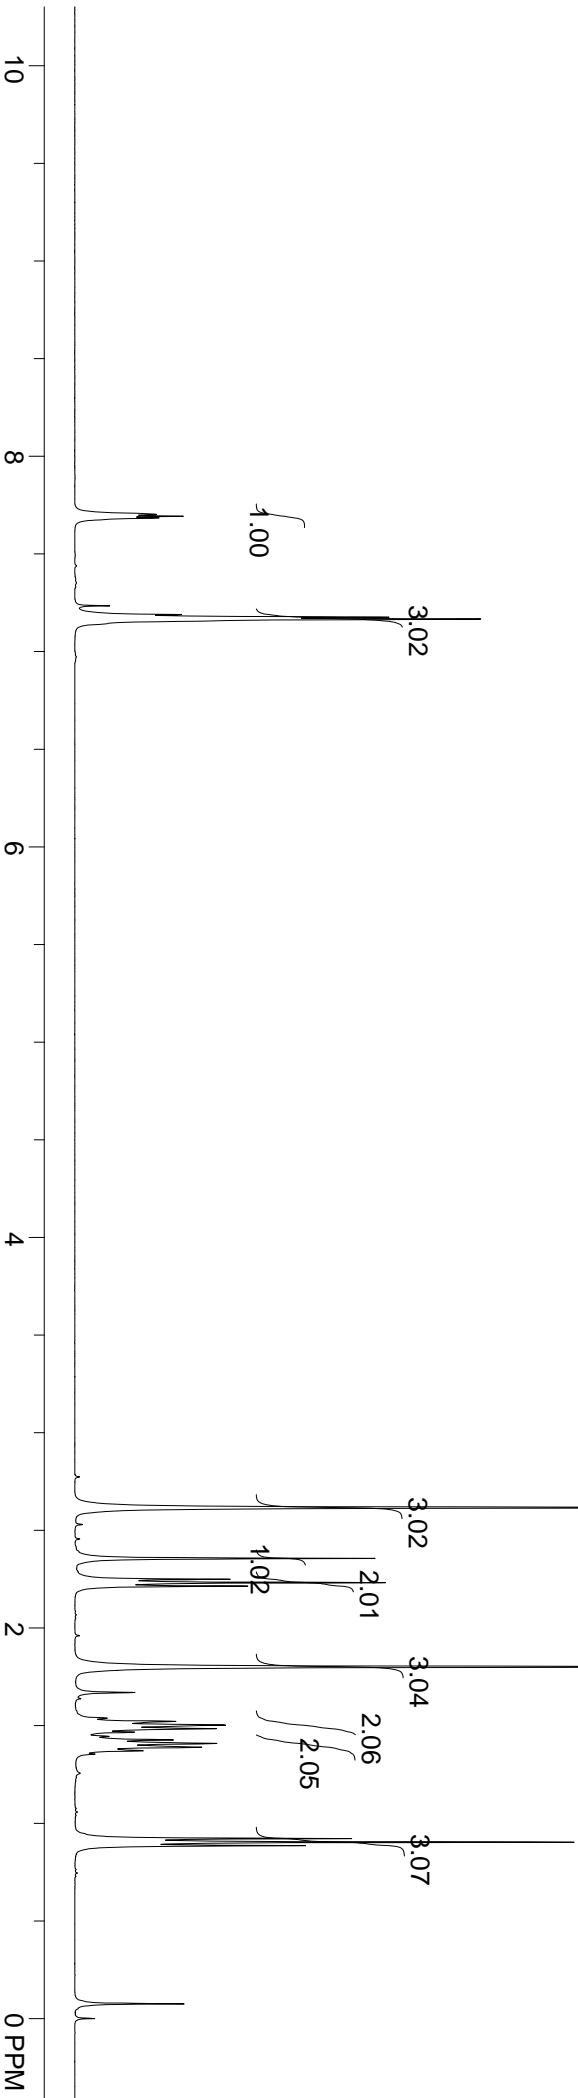



ZY-3-154-1-C  
May 1 2018  
NA = 1000  
Solvent = cdcl3  
F1 = 100.527557 MHz  
F2 = 399.749146 MHz

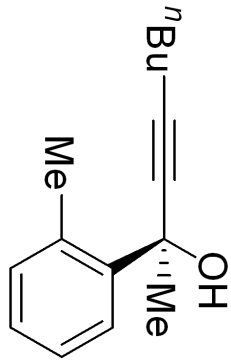

(S)-1b

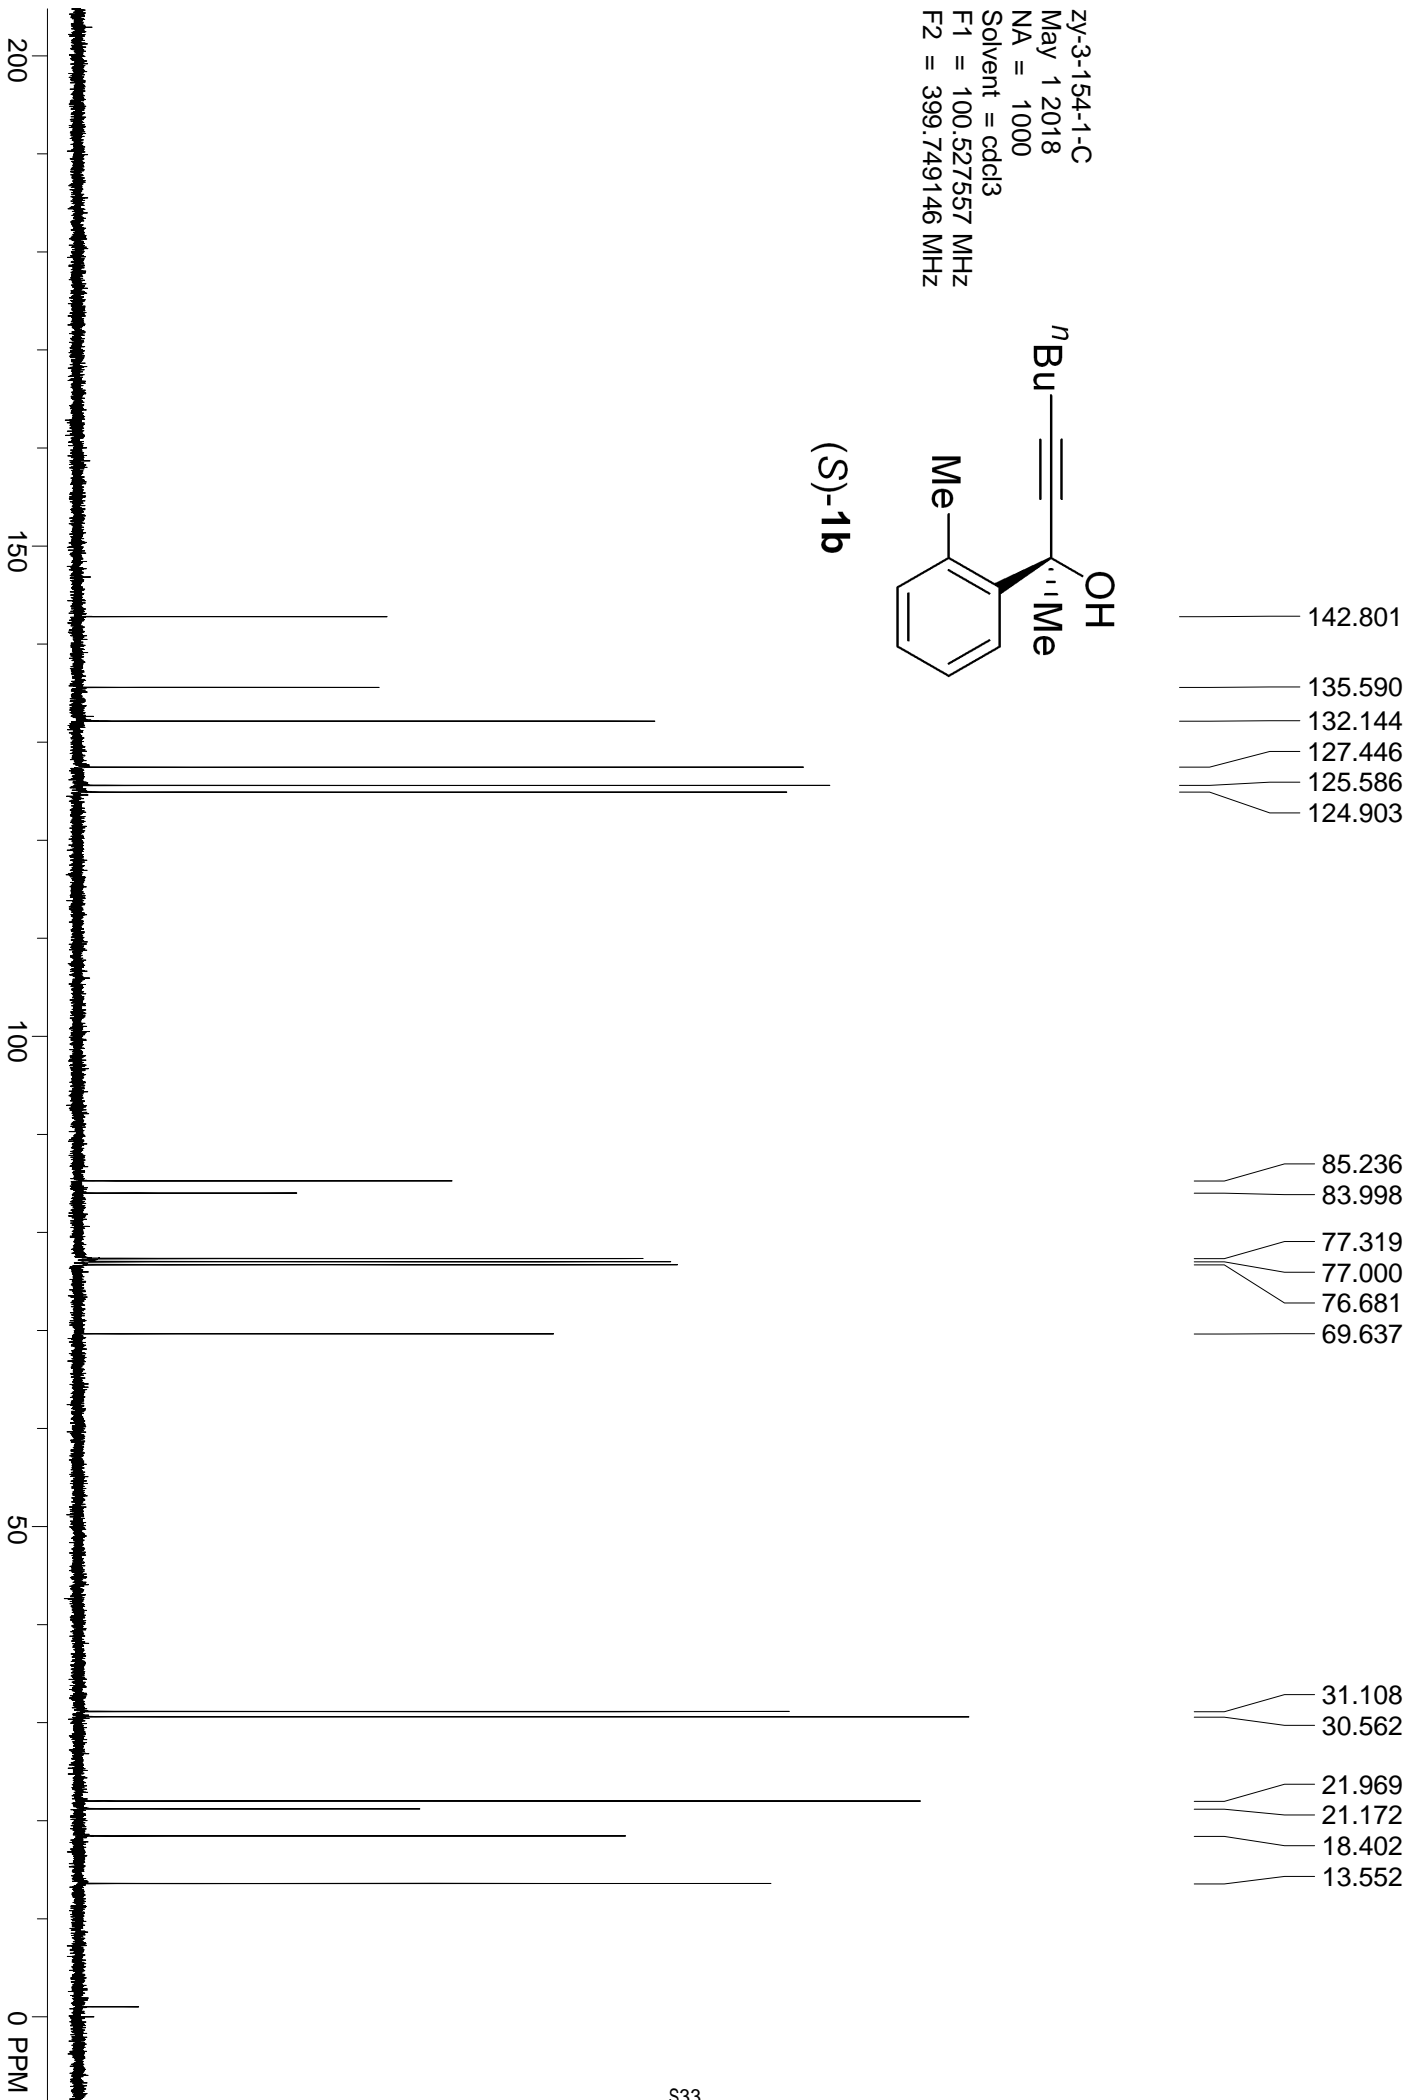

# zygy-3-154-1-AS-H-95-5-0.9-214

实验时间: 2018-04-14, 17:09:18  
谱图文件: C:\new\zy-3-154-AS-H-95-5-0.9-214.org  
方法文件: E:\data\zwf\zwf-method.mtd

报告时间: 2018-07-17, 9:45:00

实验内容简介:

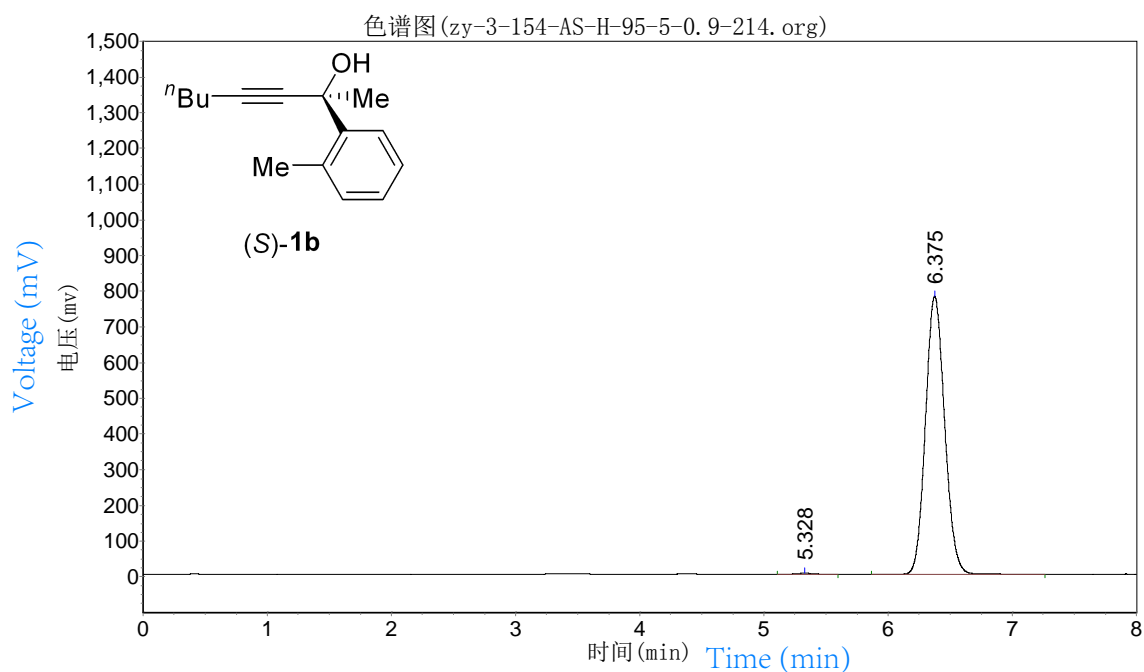

分析结果表

| 峰号 | 峰名 | 保留时间 RT [min] | 峰高 Height  | 峰面积 Area    | 含量 Area % |
|----|----|---------------|------------|-------------|-----------|
| 1  |    | 5.328         | 2832.844   | 23607.248   | 0.2816    |
| 2  |    | 6.375         | 779091.625 | 8361074.500 | 99.7184   |
| 总计 |    |               | 781924.469 | 8384681.748 | 100.0000  |

# zygy-3-154-1-rac-AS-H-95-5-0.9-214

实验时间: 2018-04-14, 17:00:08  
谱图文件: C:\new\zy-zwf-rac-2.org  
方法文件: E:\data\zwf\zwf-method.mtd

报告时间: 2018-07-17, 9:42:57

实验内容简介:

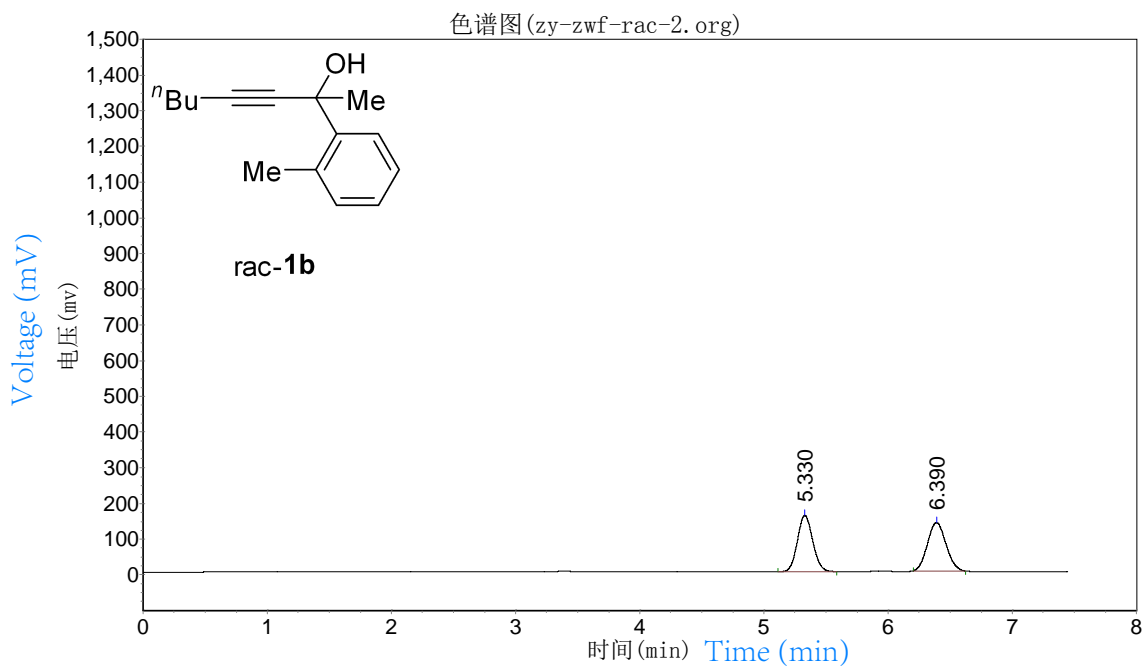

分析结果表

| 峰号 | 峰名 | 保留时间 RT [min] | 峰高 Height  | 峰面积 Area    | 含量 Area % |
|----|----|---------------|------------|-------------|-----------|
| 1  |    | 5.330         | 157610.031 | 1347914.375 | 49.0167   |
| 2  |    | 6.390         | 135354.438 | 1401994.250 | 50.9833   |
| 总计 |    |               | 292964.469 | 2749908.625 | 100.0000  |

7.471  
7.440  
7.258  
7.240  
7.222  
7.102  
7.084

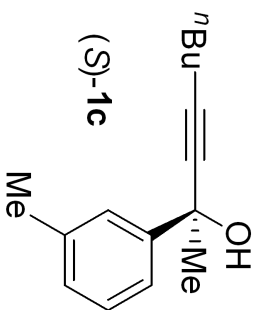

wpl-3-13-1H  
Apr 4 2018  
NA = 4  
Solvent = cdcl3  
F1 = 399.749542 MHz  
F2 = 100.526031 MHz

2.373  
2.298  
2.282  
2.264  
2.249  
1.735  
1.562  
1.542  
1.524  
1.506  
1.470  
1.453  
1.433  
1.414  
0.947  
0.929  
0.911  
0.000

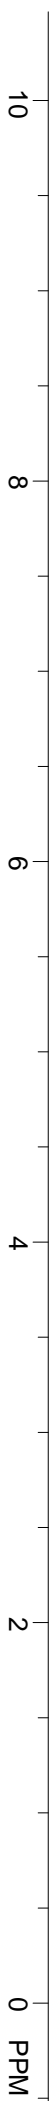

wpl-3-13-1C  
Apr 5 2018  
NA = 1000  
Solvent = cdcl3  
F1 = 100.527557 MHz  
F2 = 399.749146 MHz

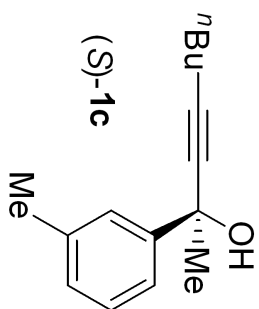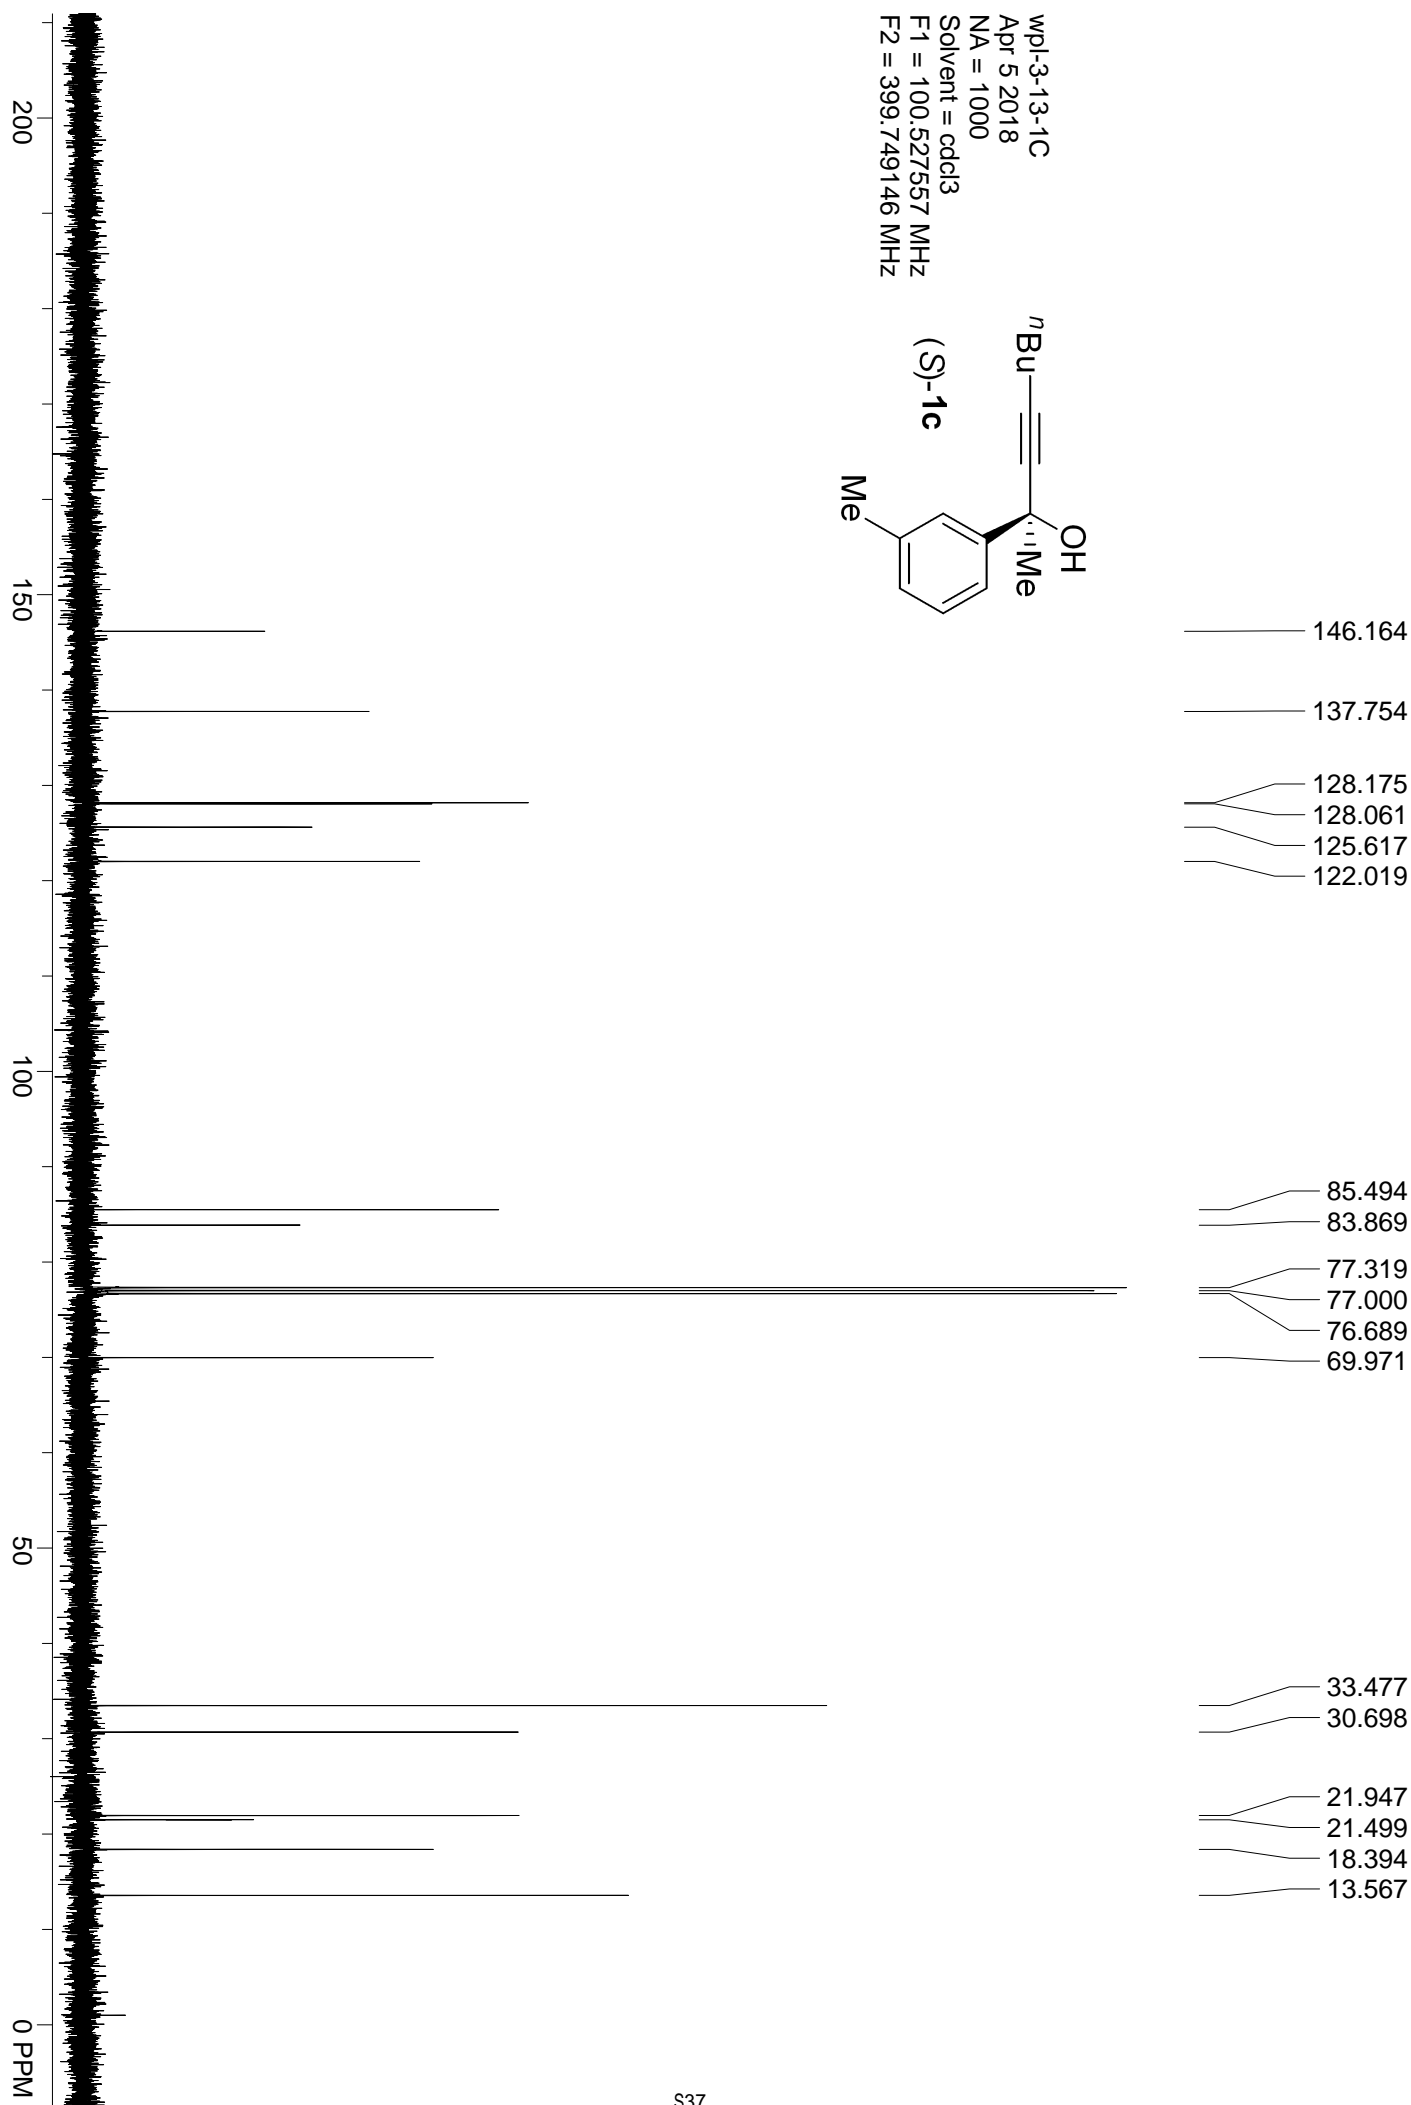

# wpl-3-013-1-as-h-95-5-1.3-214

实验时间: 2018-04-06, 15:53:55

报告时间: 2018-07-17, 18:53:20

谱图文件: E:\data\zwf\other\wpl-3-013-1-as-h-95-5-1.3-214.org

方法文件: E:\data\zwf\zwf-method.mtd

实验内容简介:

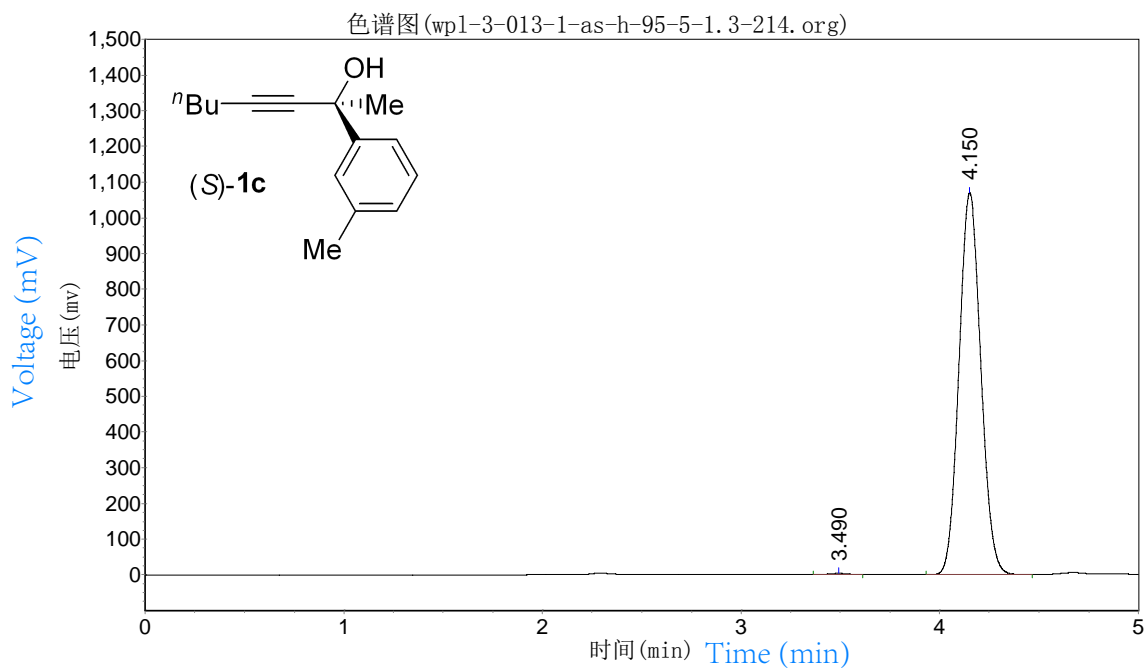

分析结果表

| 峰号 | 峰名 | 保留时间 RT [min] | 峰高 Height   | 峰面积 Area    | 含量 Area % |
|----|----|---------------|-------------|-------------|-----------|
| 1  |    | 3.490         | 3659.800    | 23983.699   | 0.2921    |
| 2  |    | 4.150         | 1069736.625 | 8186462.000 | 99.7079   |
| 总计 |    |               | 1073396.425 | 8210445.699 | 100.0000  |

# wpl-3-013-1-rac-as-h-95-5-1.3-214

实验时间: 2018-04-08, 17:04:30

报告时间: 2018-07-17, 18:52:10

谱图文件: E:\data\zwf\other\wpl-3-013-1-rac-as-h-95-5-1.3-

214.org

方法文件: E:\data\zwf\zwf-method.mtd

实验内容简介:

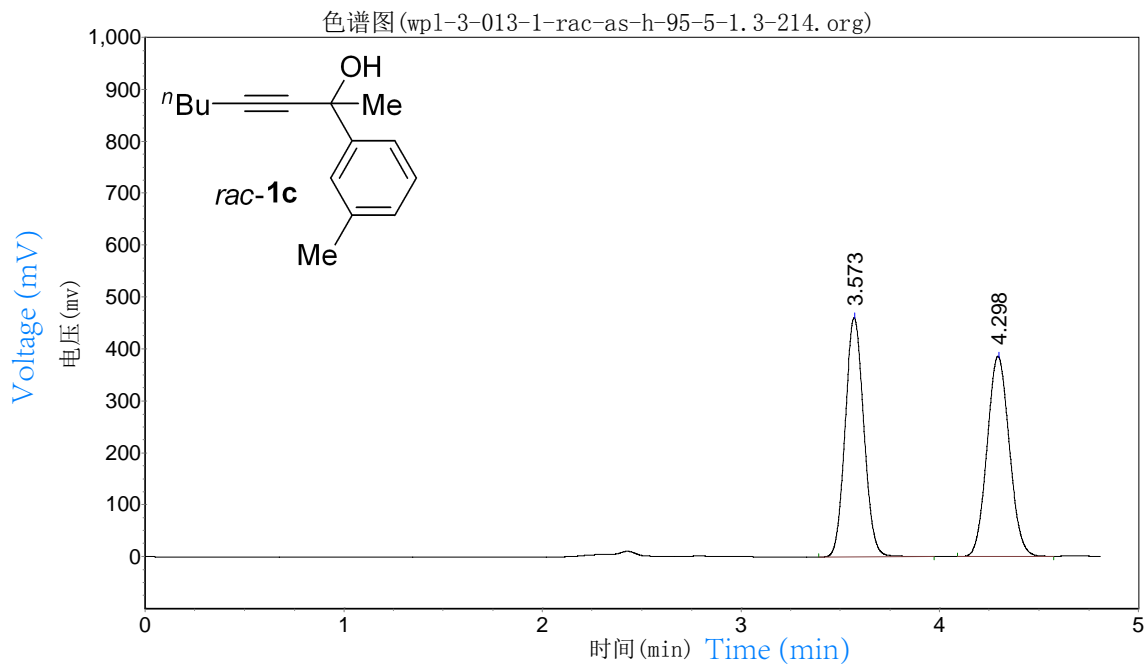

分析结果表

| 峰号 | 峰名 | 保留时间 RT [min] | 峰高 Height  | 峰面积 Area    | 含量 Area % |
|----|----|---------------|------------|-------------|-----------|
| 1  |    | 3.573         | 460089.656 | 2991042.250 | 50.0341   |
| 2  |    | 4.298         | 384762.594 | 2986964.750 | 49.9659   |
| 总计 |    |               | 844852.250 | 5978007.000 | 100.0000  |

7.544  
7.523  
7.238  
7.160  
7.140

2.339  
2.284  
2.266  
2.248  
1.724  
1.564  
1.549  
1.530  
1.511  
1.494  
1.474  
1.456  
1.438  
1.418  
1.401  
1.383  
0.940  
0.921  
0.903  
-0.000

zwf-3-068-1H  
Apr 28 2018  
SOLVENT: cdcl3  
NA = 4  
F1 = 399.749542 MHz  
F2 = 100.526031 MHz

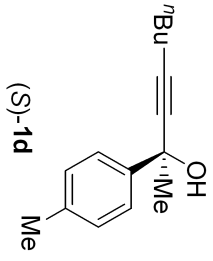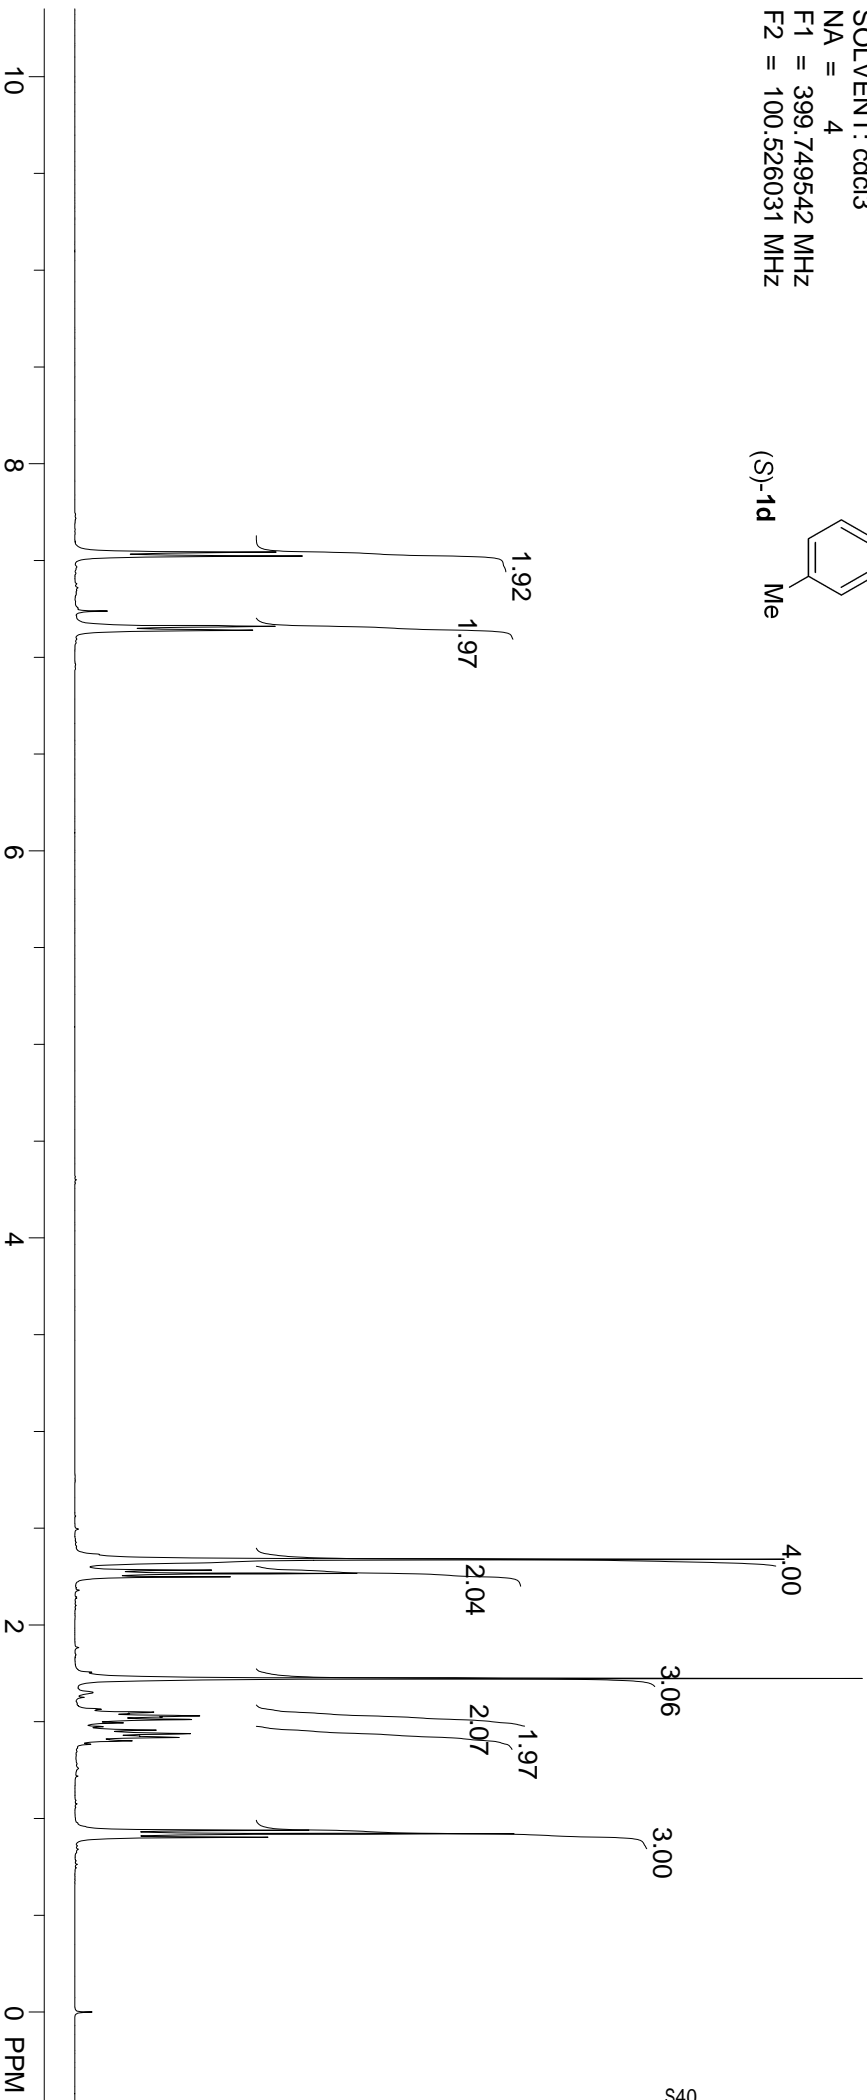



zwf-3-068-1C  
Apr 28 2018  
SOLVENT: cdcl3  
NA = 64  
F1 = 100.527557 MHz  
F2 = 399.749146 MHz

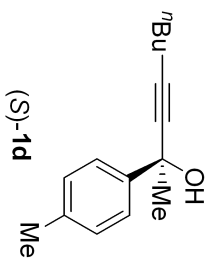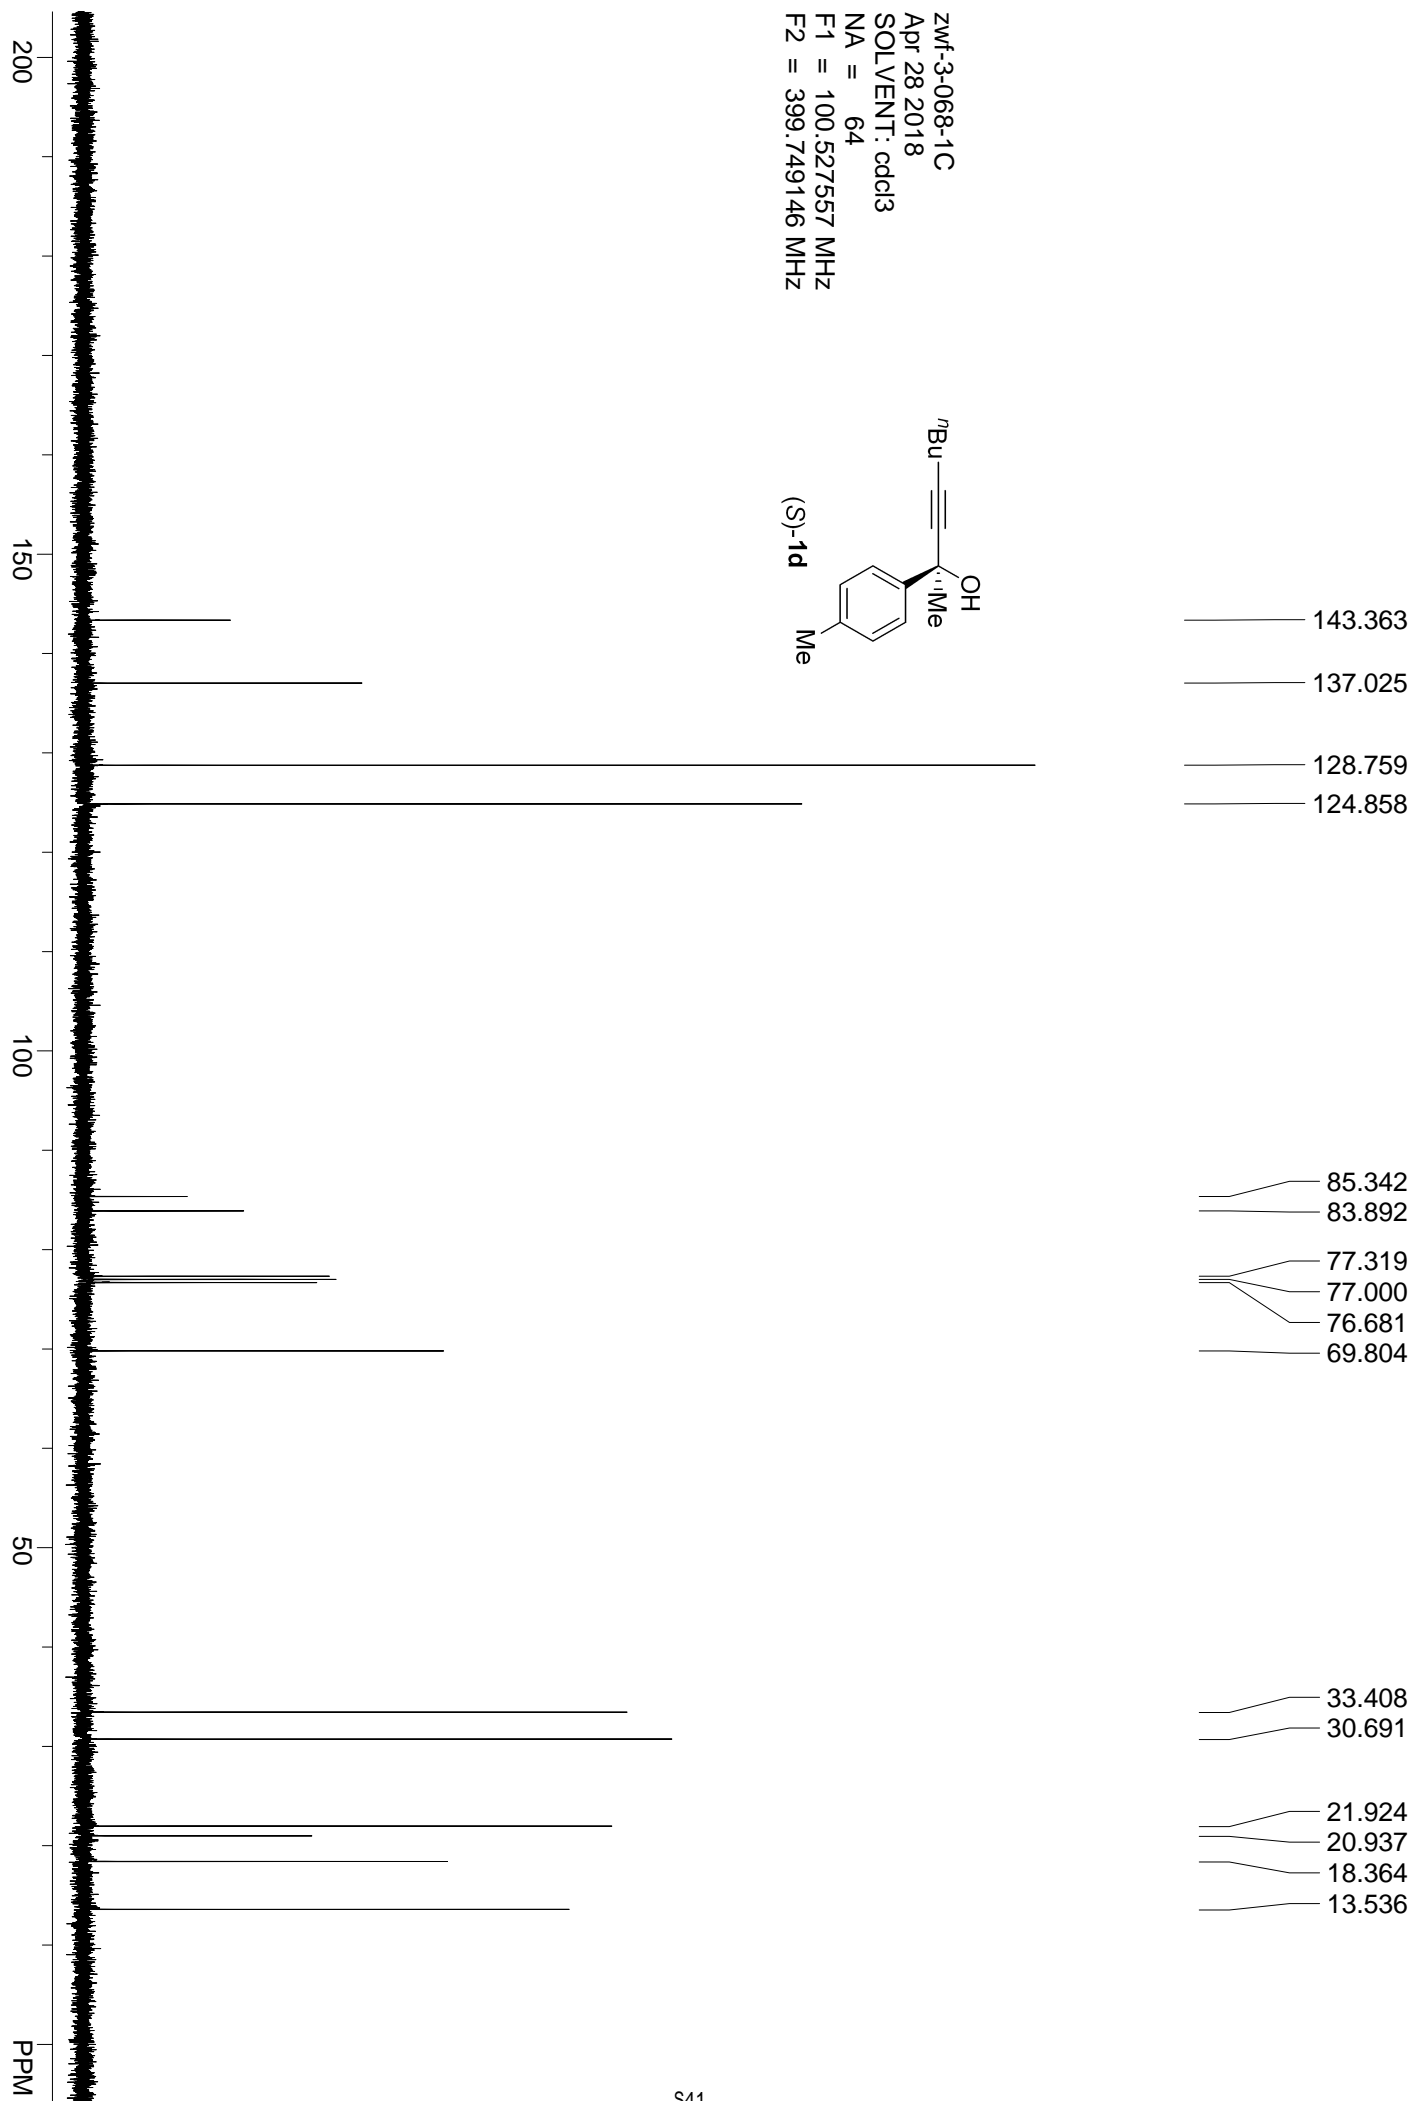

# zwf-3-068-1-AS-H-98-2-1.0-214

实验时间: 2018-04-27, 21:25:09

报告时间: 2018-04-27, 22:06:08

谱图文件: E:\data\zwf\zwf-3-068-1-AS-H-98-2-1.0-214-A.org

方法文件: E:\data\yaoyuan\0414.mtd

实验内容简介:

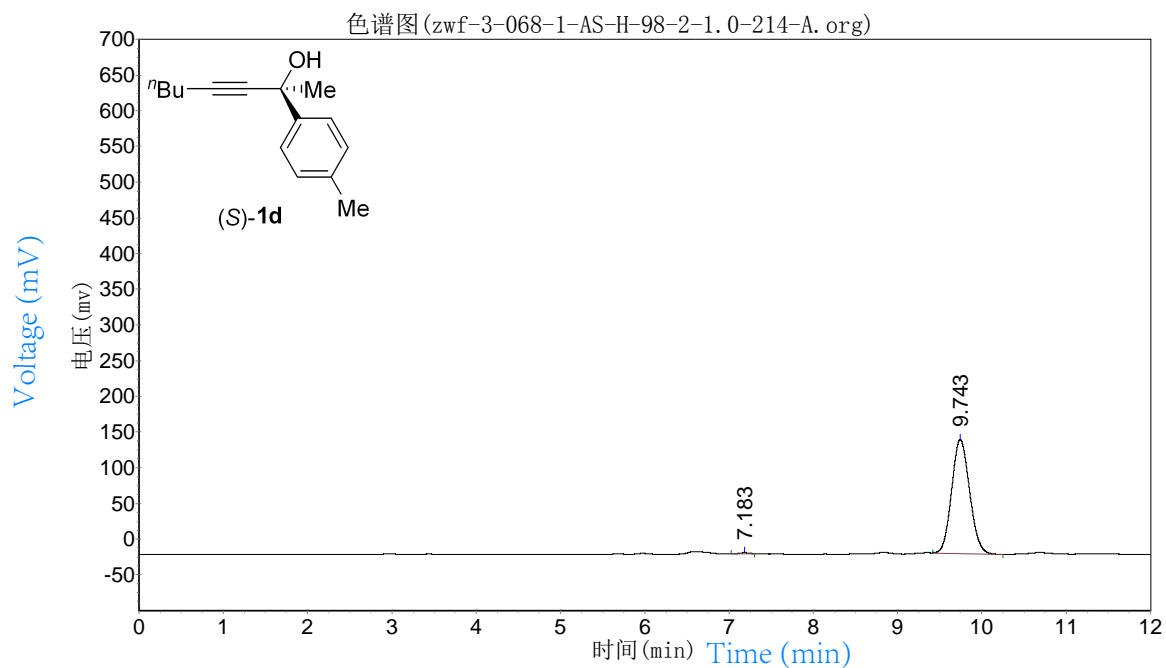

分析结果表

| 峰号 | 峰名 | 保留时间 RT [min] | 峰高 Height  | 峰面积 Area    | 含量 Area % |
|----|----|---------------|------------|-------------|-----------|
| 1  |    | 7.183         | 1625.179   | 13089.509   | 0.5526    |
| 2  |    | 9.743         | 159608.438 | 2355492.500 | 99.4474   |
| 总计 |    |               | 161233.616 | 2368582.009 | 100.0000  |

# zwf-3-068-1-rac-AS-H-98-2-1.0-214

实验时间: 2018-04-27, 20:31:04

报告时间: 2018-04-27, 21:58:32

谱图文件: E:\data\zwf\zwf-3-068-1-rac-AS-H-98-2-1.0-214.org

方法文件: E:\data\yaoyuan\0414.mtd

实验内容简介:

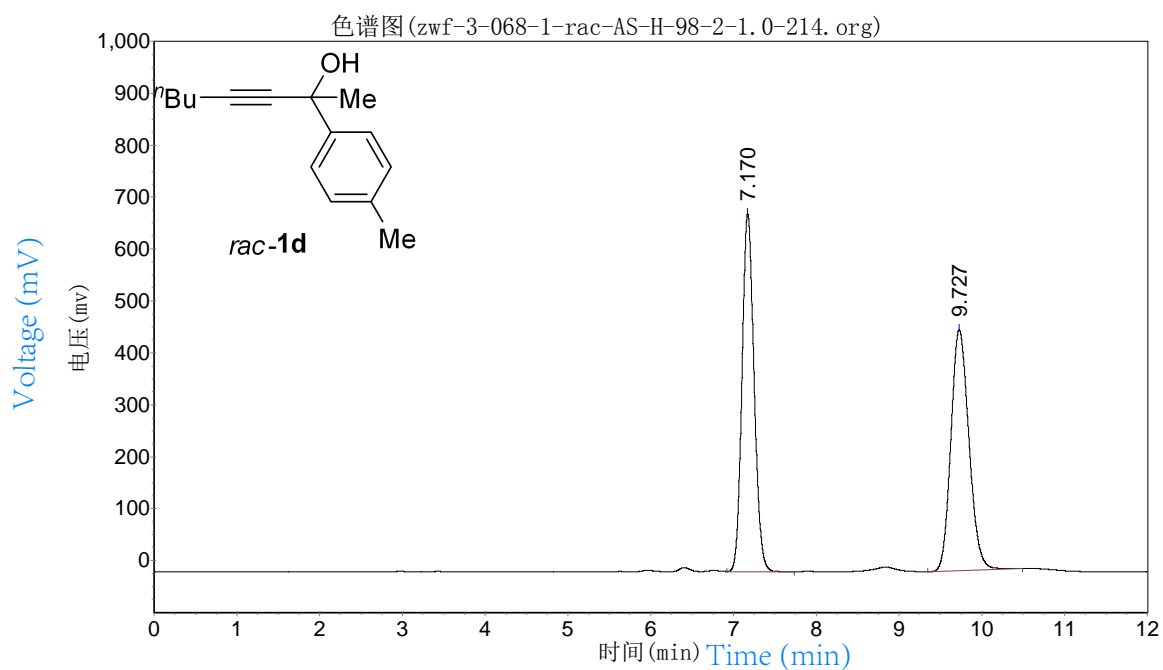

分析结果表

| 峰号 | 峰名 | 保留时间 RT [min] | 峰高 Height   | 峰面积 Area     | 含量 Area % |
|----|----|---------------|-------------|--------------|-----------|
| 1  |    | 7.170         | 689154.438  | 6978570.000  | 49.9152   |
| 2  |    | 9.727         | 463632.469  | 7002289.000  | 50.0848   |
| 总计 |    |               | 1152786.906 | 13980859.000 | 100.0000  |

zwf-3-059-1H  
 Apr 24 2018  
 SOLVENT: cdcl3  
 NA = 4  
 F1 = 399.749542 MHz  
 F2 = 100.526031 MHz

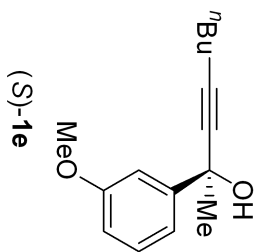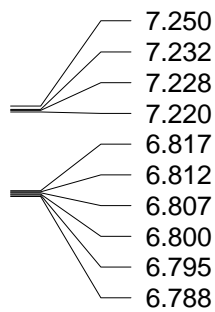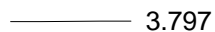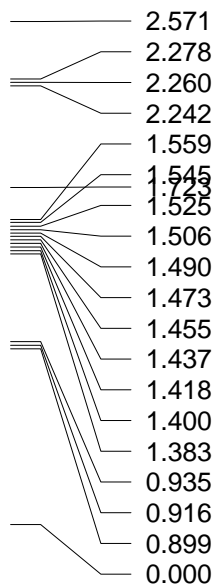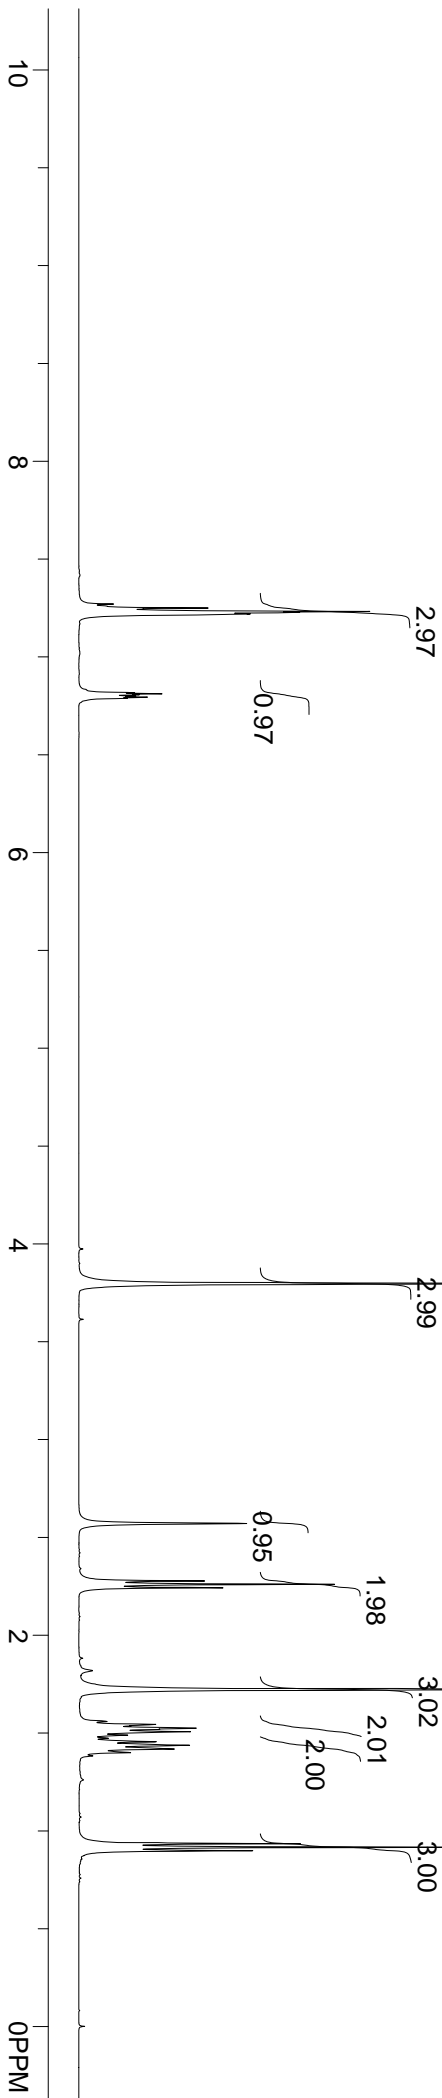

zwf-3-059-2C  
Apr 24 2018  
SOLVENT: cdcl3  
NA = 64  
F1 = 100.527557 MHz  
F2 = 399.749146 MHz

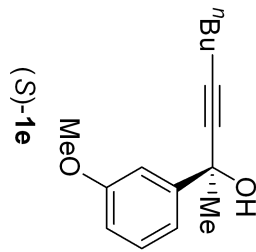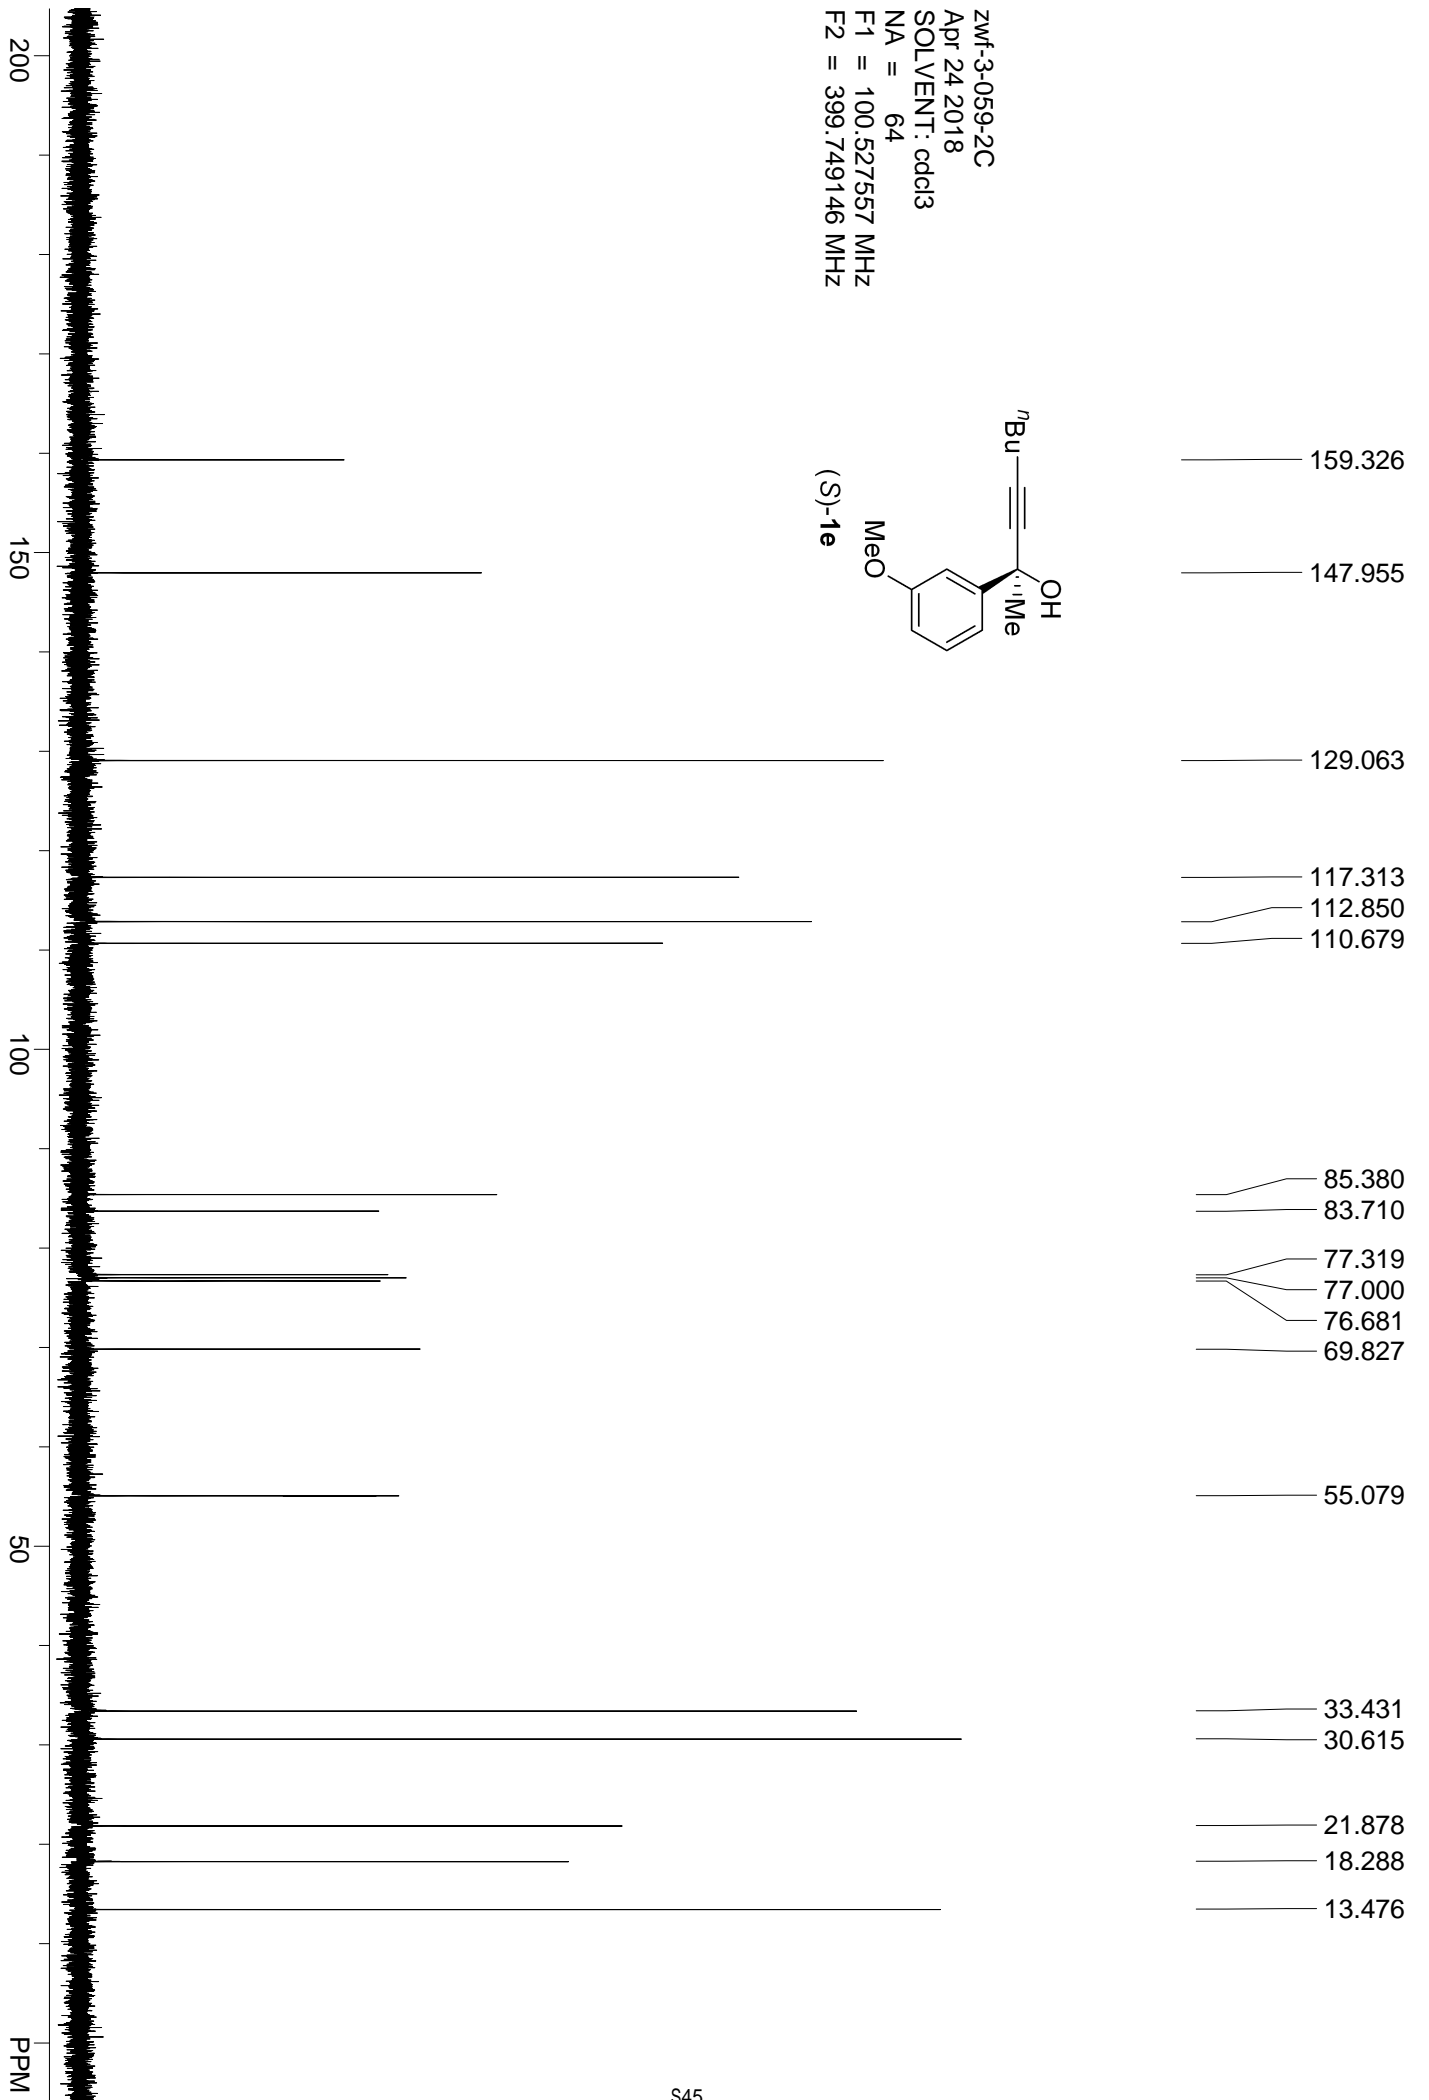

# zwf-3-059-1-AS-H-98-2-1.0-214

实验时间: 2018-04-24, 11:03:07  
谱图文件: E:\data\zwf\zwf-3-059-1-AS-H-98-2-1.0-214.org  
方法文件: E:\data\yaoyuan\0414.mtd

报告时间: 2018-04-24, 11:27:00

实验内容简介:

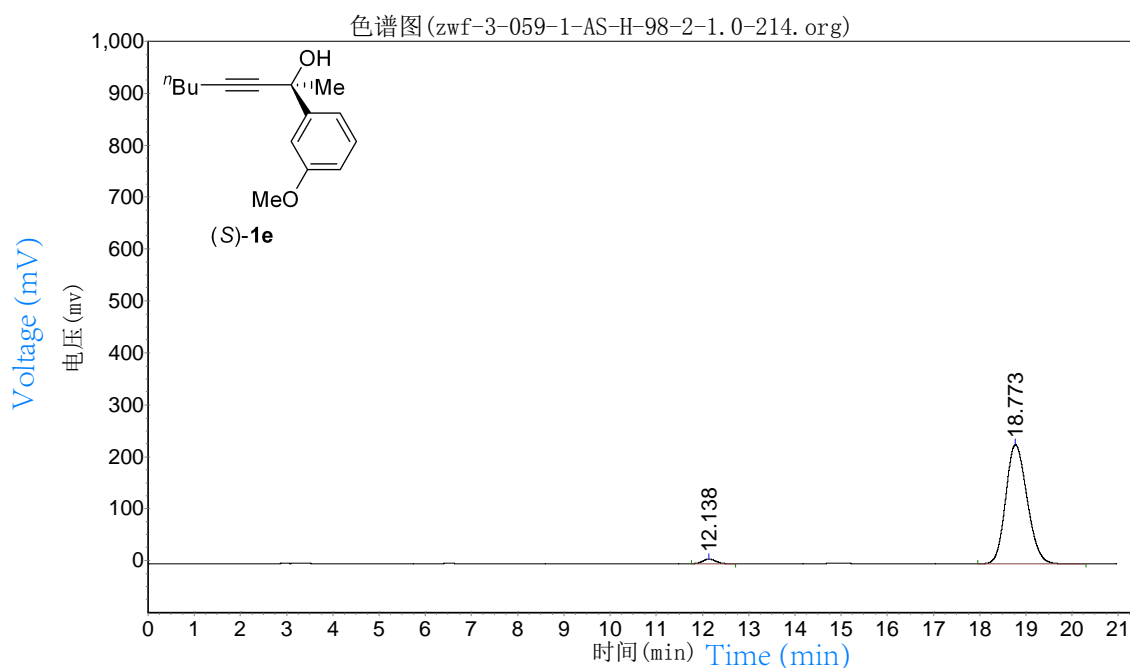

分析结果表

| 峰号 | 峰名 | 保留时间 RT [min] | 峰高 Height  | 峰面积 Area    | 含量 Area % |
|----|----|---------------|------------|-------------|-----------|
| 1  |    | 12.138        | 8985.907   | 167726.438  | 2.2317    |
| 2  |    | 18.773        | 229401.469 | 7347846.500 | 97.7683   |
| 总计 |    |               | 238387.376 | 7515572.938 | 100.0000  |

# zwf-3-059-1-rac-AS-H-98-2-1.0-214

实验时间: 2018-04-24, 11:24:45

报告时间: 2018-04-24, 11:54:41

谱图文件: E:\data\zwf\zwf-3-059-1-rac-AS-H-98-2-1.0-214.org

方法文件: E:\data\yaoyuan\0414.mtd

实验内容简介:

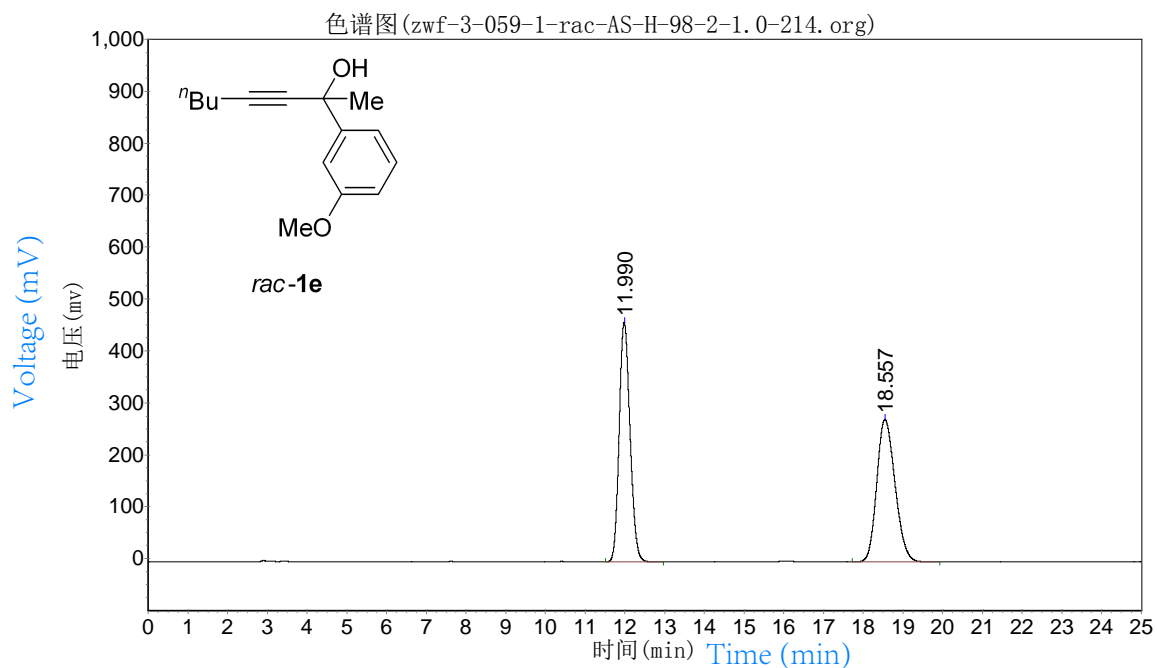

分析结果表

| 峰号 | 峰名 | 保留时间 RT [min] | 峰高 Height  | 峰面积 Area     | 含量 Area % |
|----|----|---------------|------------|--------------|-----------|
| 1  |    | 11.990        | 461343.125 | 8738462.000  | 49.9666   |
| 2  |    | 18.557        | 274084.594 | 8750151.000  | 50.0334   |
| 总计 |    |               | 735427.719 | 17488613.000 | 100.0000  |

7.574  
7.557  
7.552  
7.301  
7.279

2.271  
2.254  
2.580  
2.236  
1.698  
1.553  
1.538  
1.531  
1.518  
1.501  
1.483  
1.461  
1.444  
1.425  
1.406  
1.388  
0.936  
0.917  
0.900  
-0.000

zmf-3-060-1H  
Apr 24 2018  
SOLVENT: cdcl3  
NA = 4  
F1 = 399.749542 MHz  
F2 = 100.526031 MHz

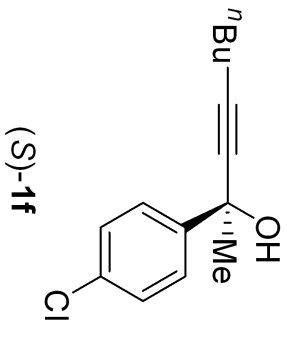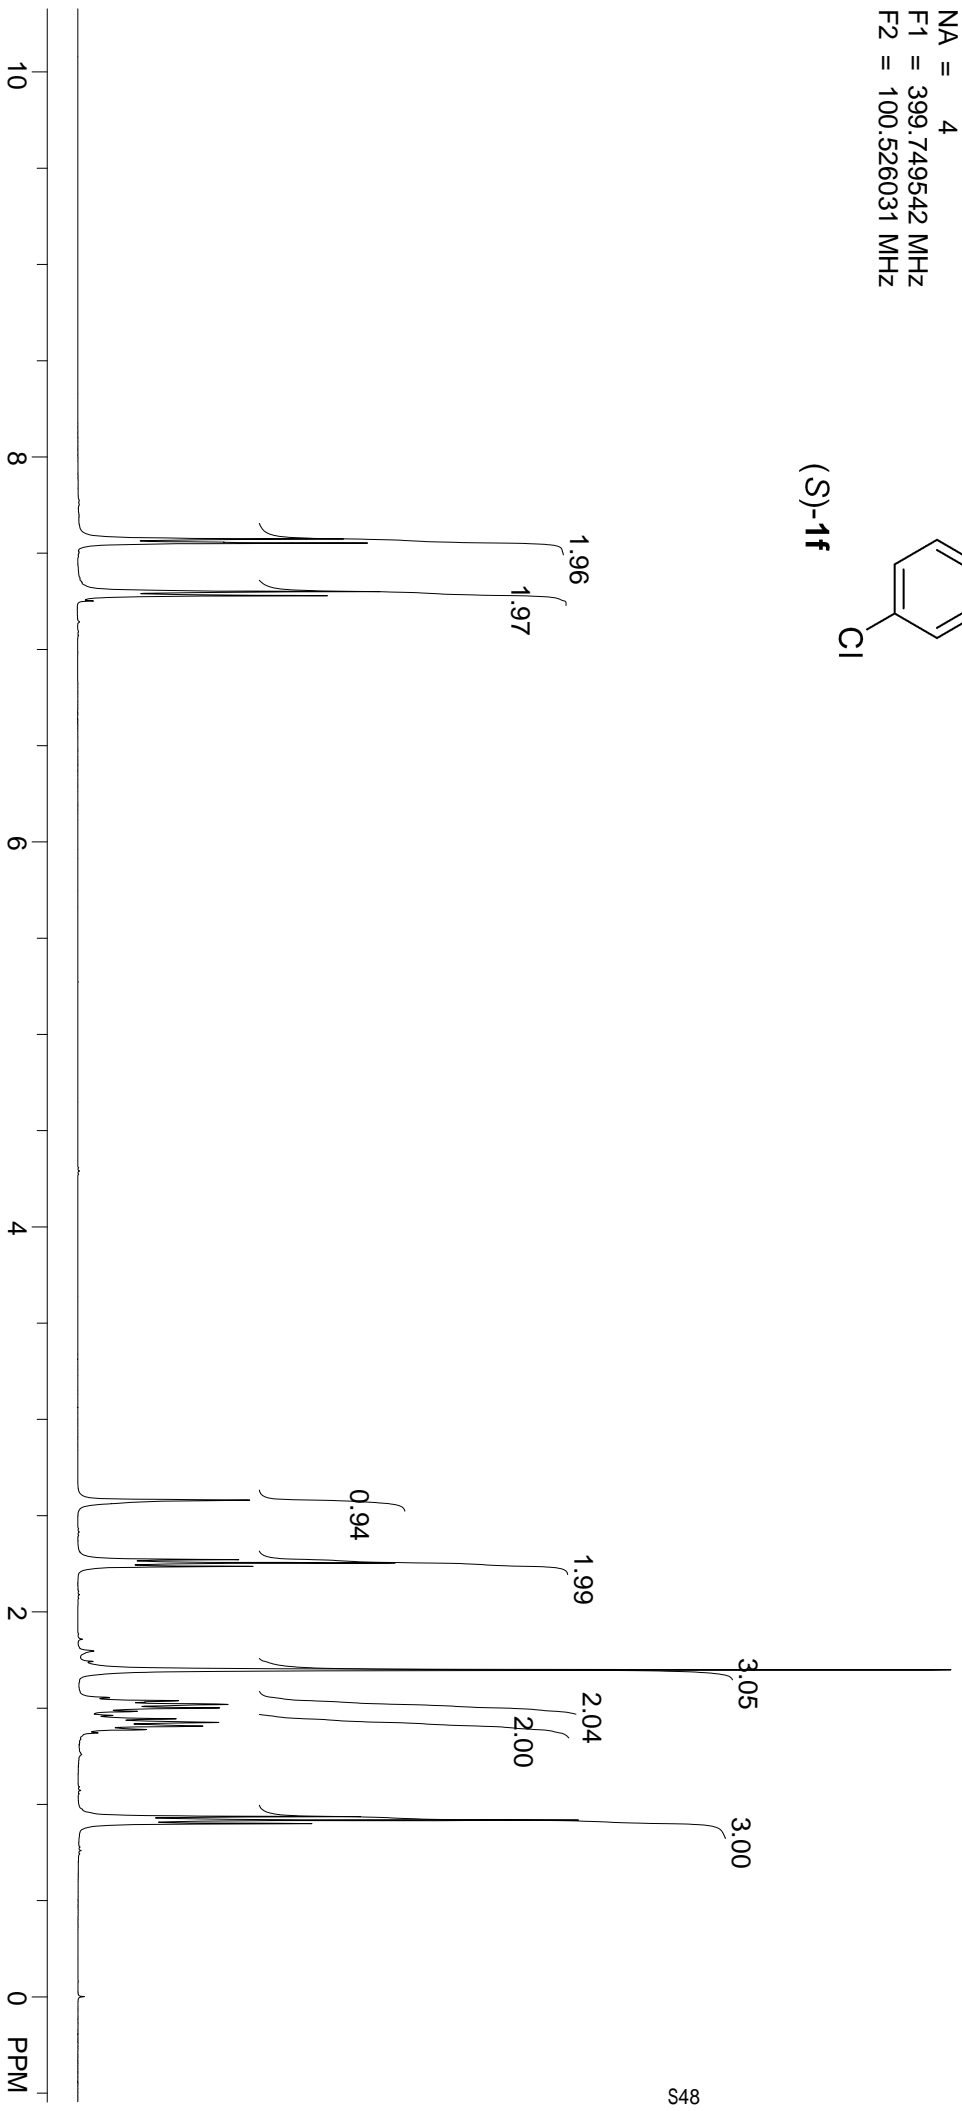



Zwf-3-060-1-C  
Apr 24 2018  
SOLVENT: cdcl3  
NA = 64  
F1 = 100.527557 MHz  
F2 = 399.749146 MHz

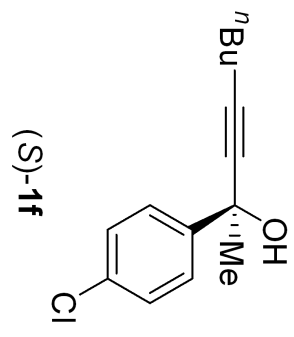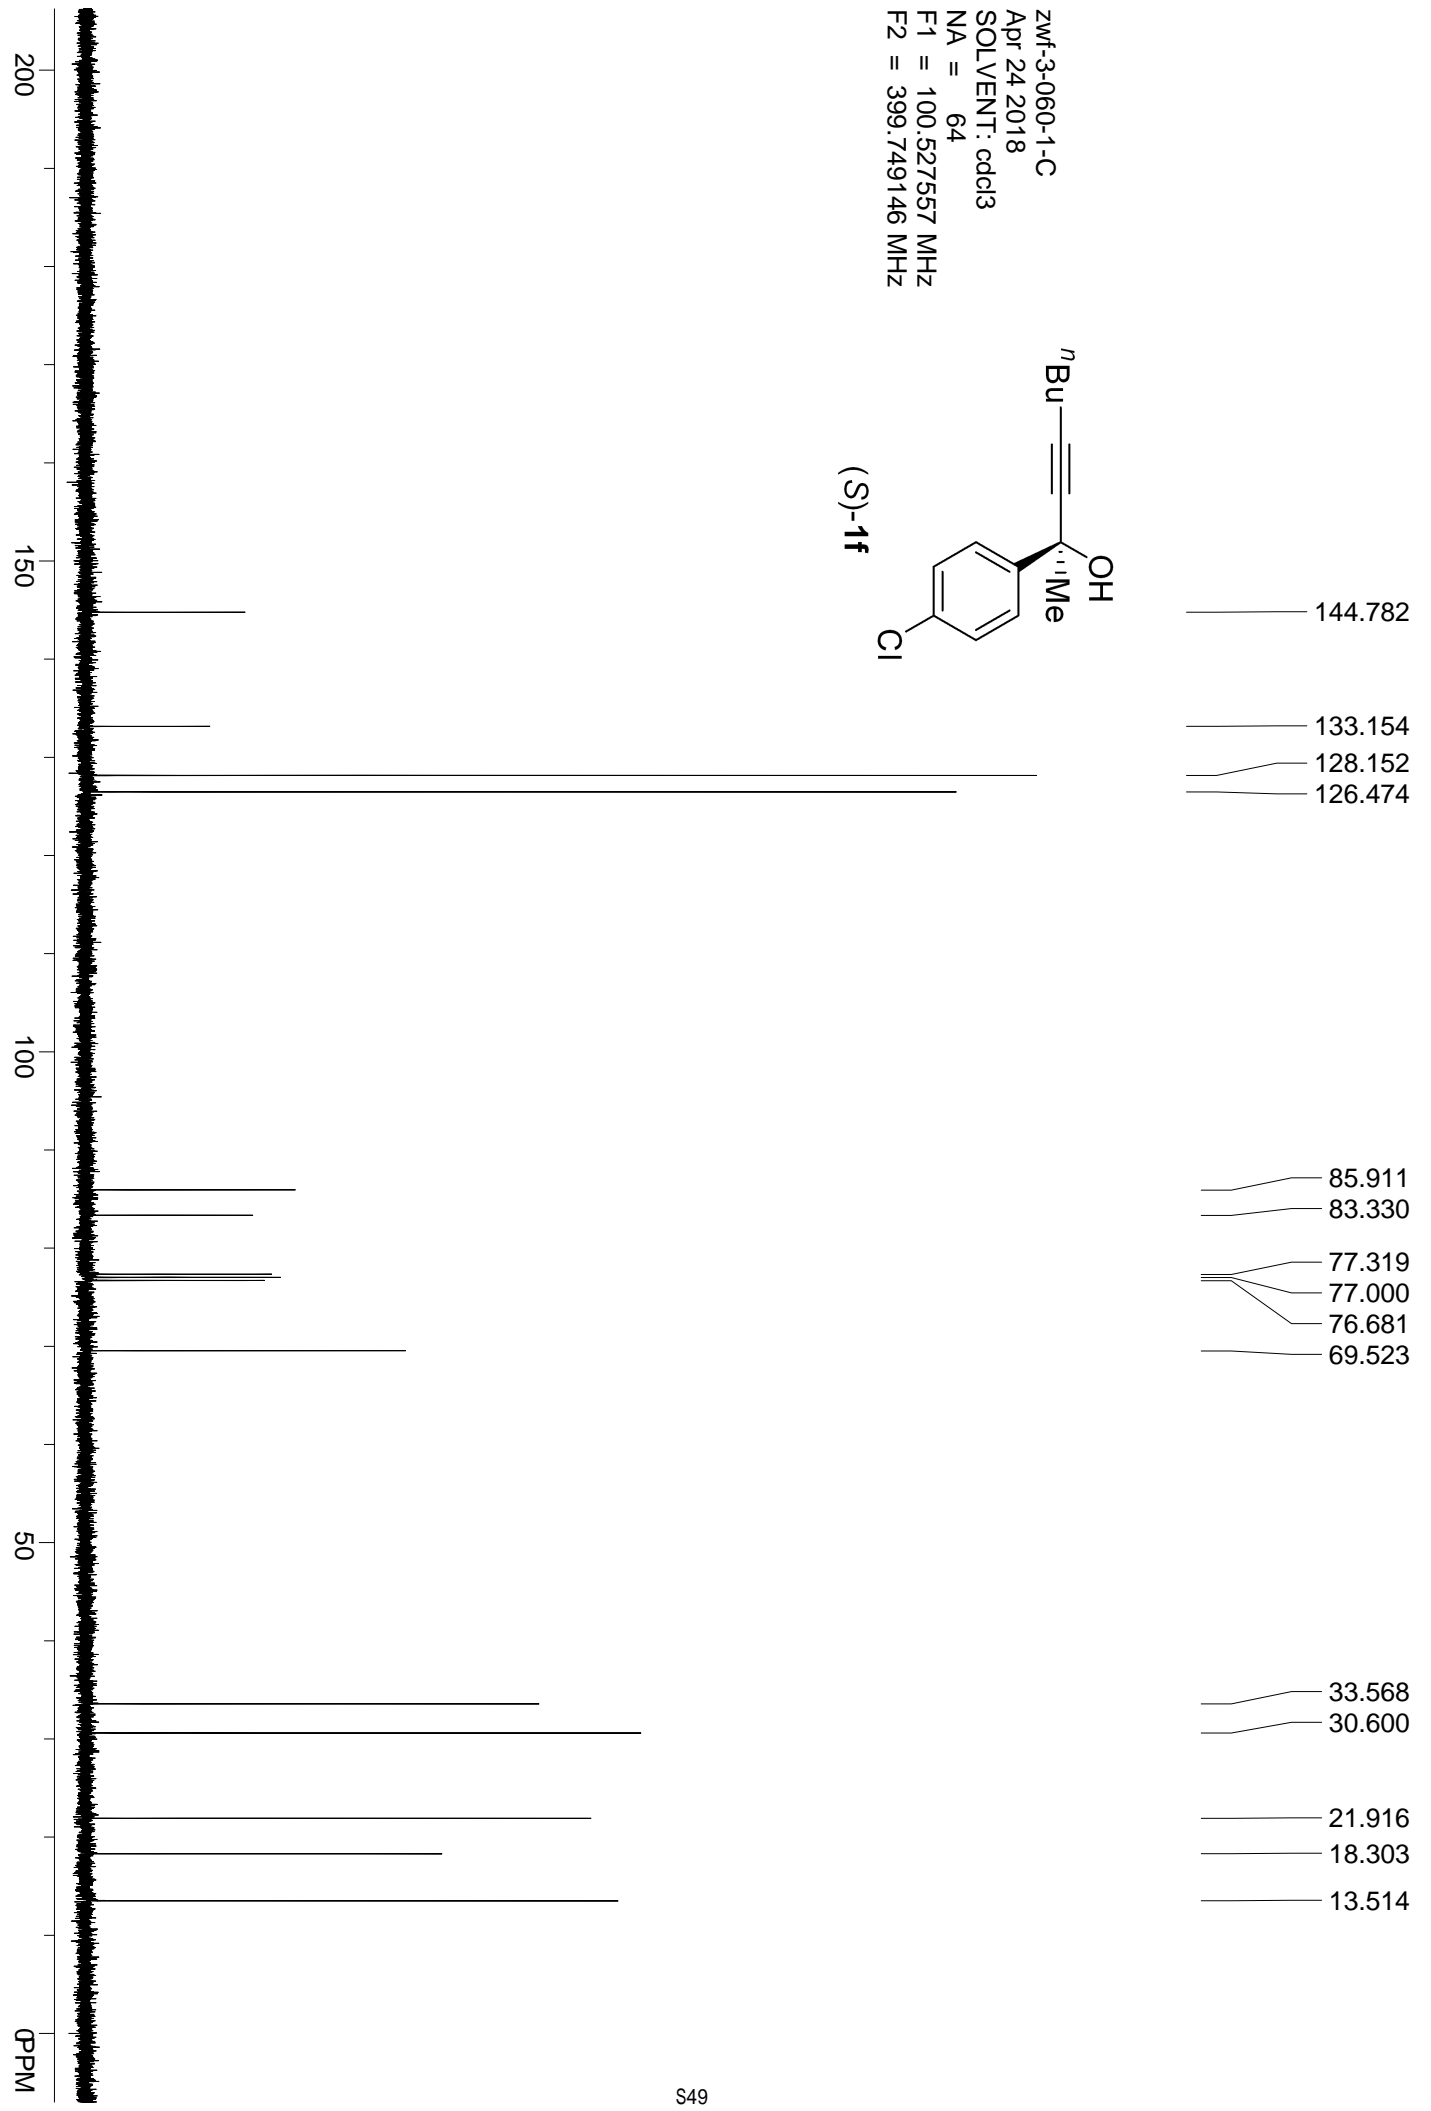

# zwf-3-060-1-AS-H-98-2-1.0-214

实验时间: 2018-04-24, 11:52:54

报告时间: 2018-04-24, 12:20:34

谱图文件: E:\data\zwf\zwf-3-060-1-AS-H-98-2-1.0-214.org

方法文件: E:\data\yaoyuan\0414.mtd

实验内容简介:

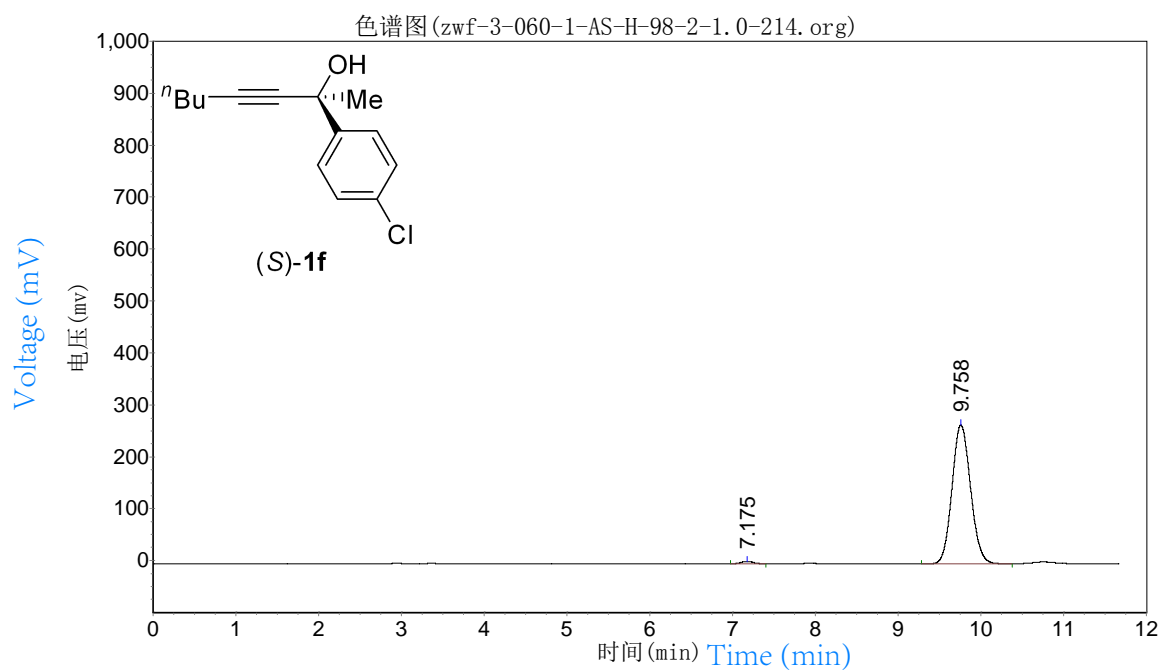

分析结果表

| 峰号 | 峰名 | 保留时间 RT [min] | 峰高 Height  | 峰面积 Area    | 含量 Area % |
|----|----|---------------|------------|-------------|-----------|
| 1  |    | 7.175         | 4275.595   | 43203.250   | 1.0291    |
| 2  |    | 9.758         | 267504.875 | 4154805.000 | 98.9709   |
| 总计 |    |               | 271780.470 | 4198008.250 | 100.0000  |

# zwf-3-060-1-rac-AS-H-98-2-1.0-214

实验时间: 2018-04-24, 12:05:09

报告时间: 2018-04-24, 12:21:19

谱图文件: E:\data\zwf\zwf-3-060-1-rac-AS-H-98-2-1.0-214.org

方法文件: E:\data\yaoyuan\0414.mtd

实验内容简介:

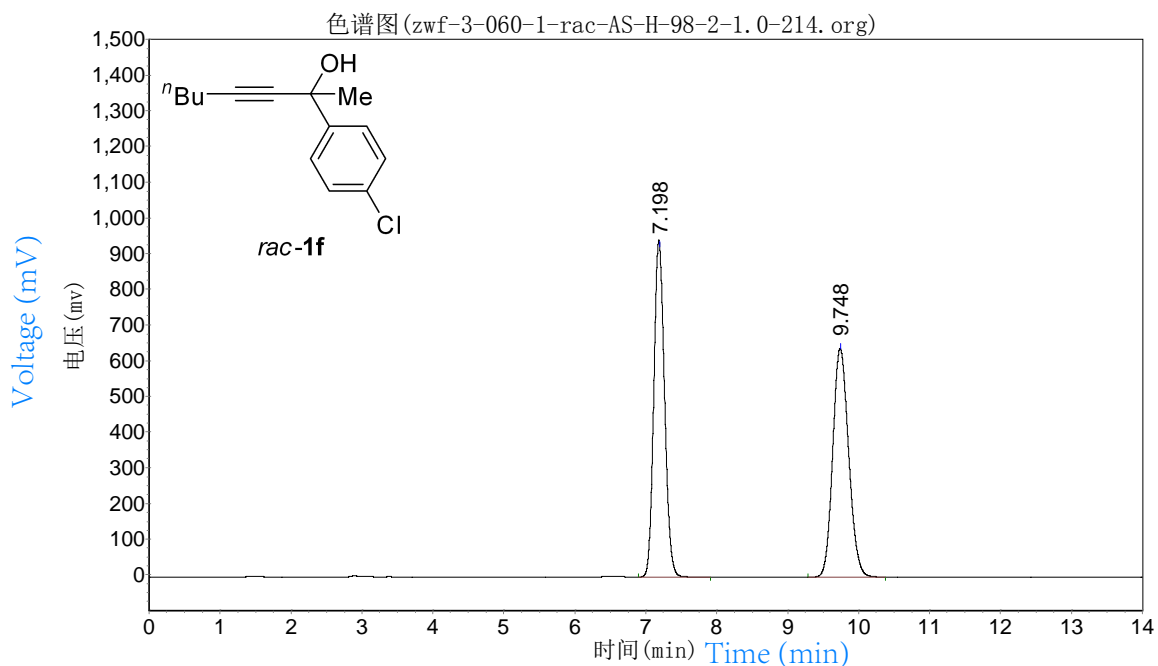

分析结果表

| 峰号 | 峰名 | 保留时间 RT [min] | 峰高 Height   | 峰面积 Area     | 含量 Area % |
|----|----|---------------|-------------|--------------|-----------|
| 1  |    | 7.198         | 937231.813  | 9895886.000  | 49.8592   |
| 2  |    | 9.748         | 639910.625  | 9951757.000  | 50.1408   |
| 总计 |    |               | 1577142.438 | 19847643.000 | 100.0000  |

hcf-2-164-1-H  
Apr 3 2018  
SOLVENT: cdcl3  
NA = 4  
F1 = 399.749542 MHz  
F2 = 100.526031 MHz

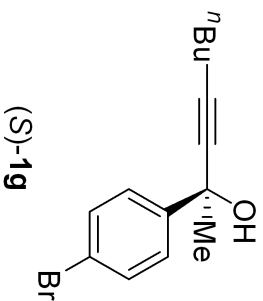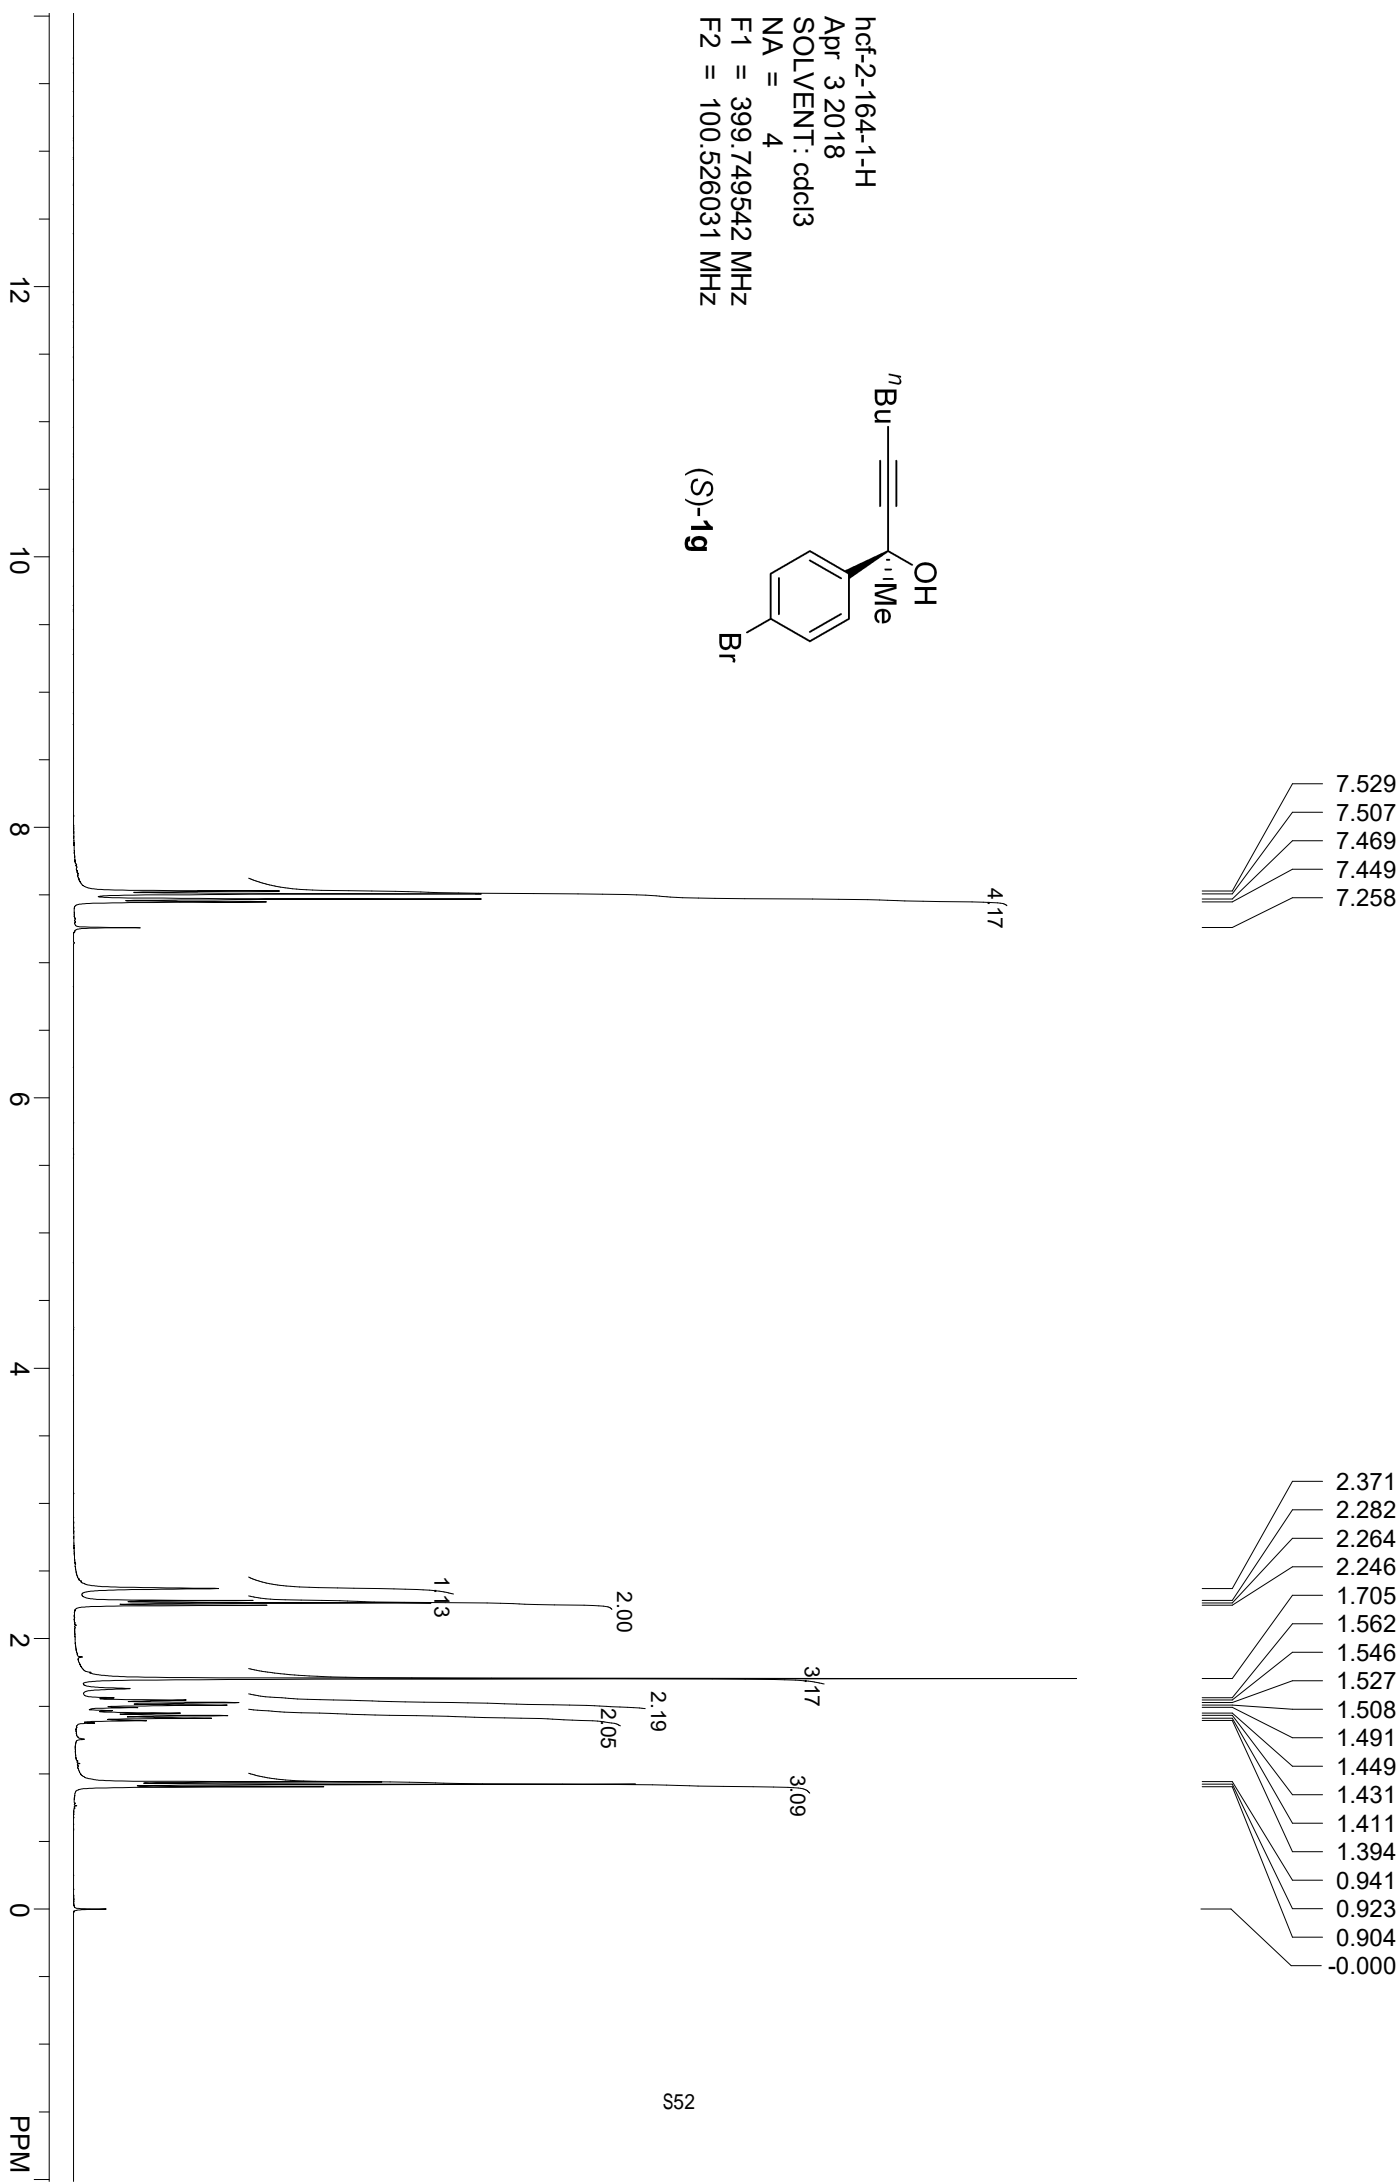

hcf-2-164-1-C  
Apr 3 2018  
SOLVENT: CDCI3  
NA = 256  
F1 = 100.612770 MHz  
F2 = 1.000000 MHz

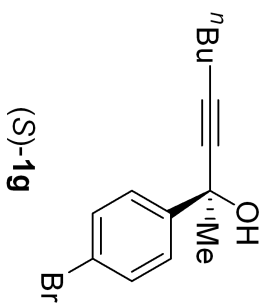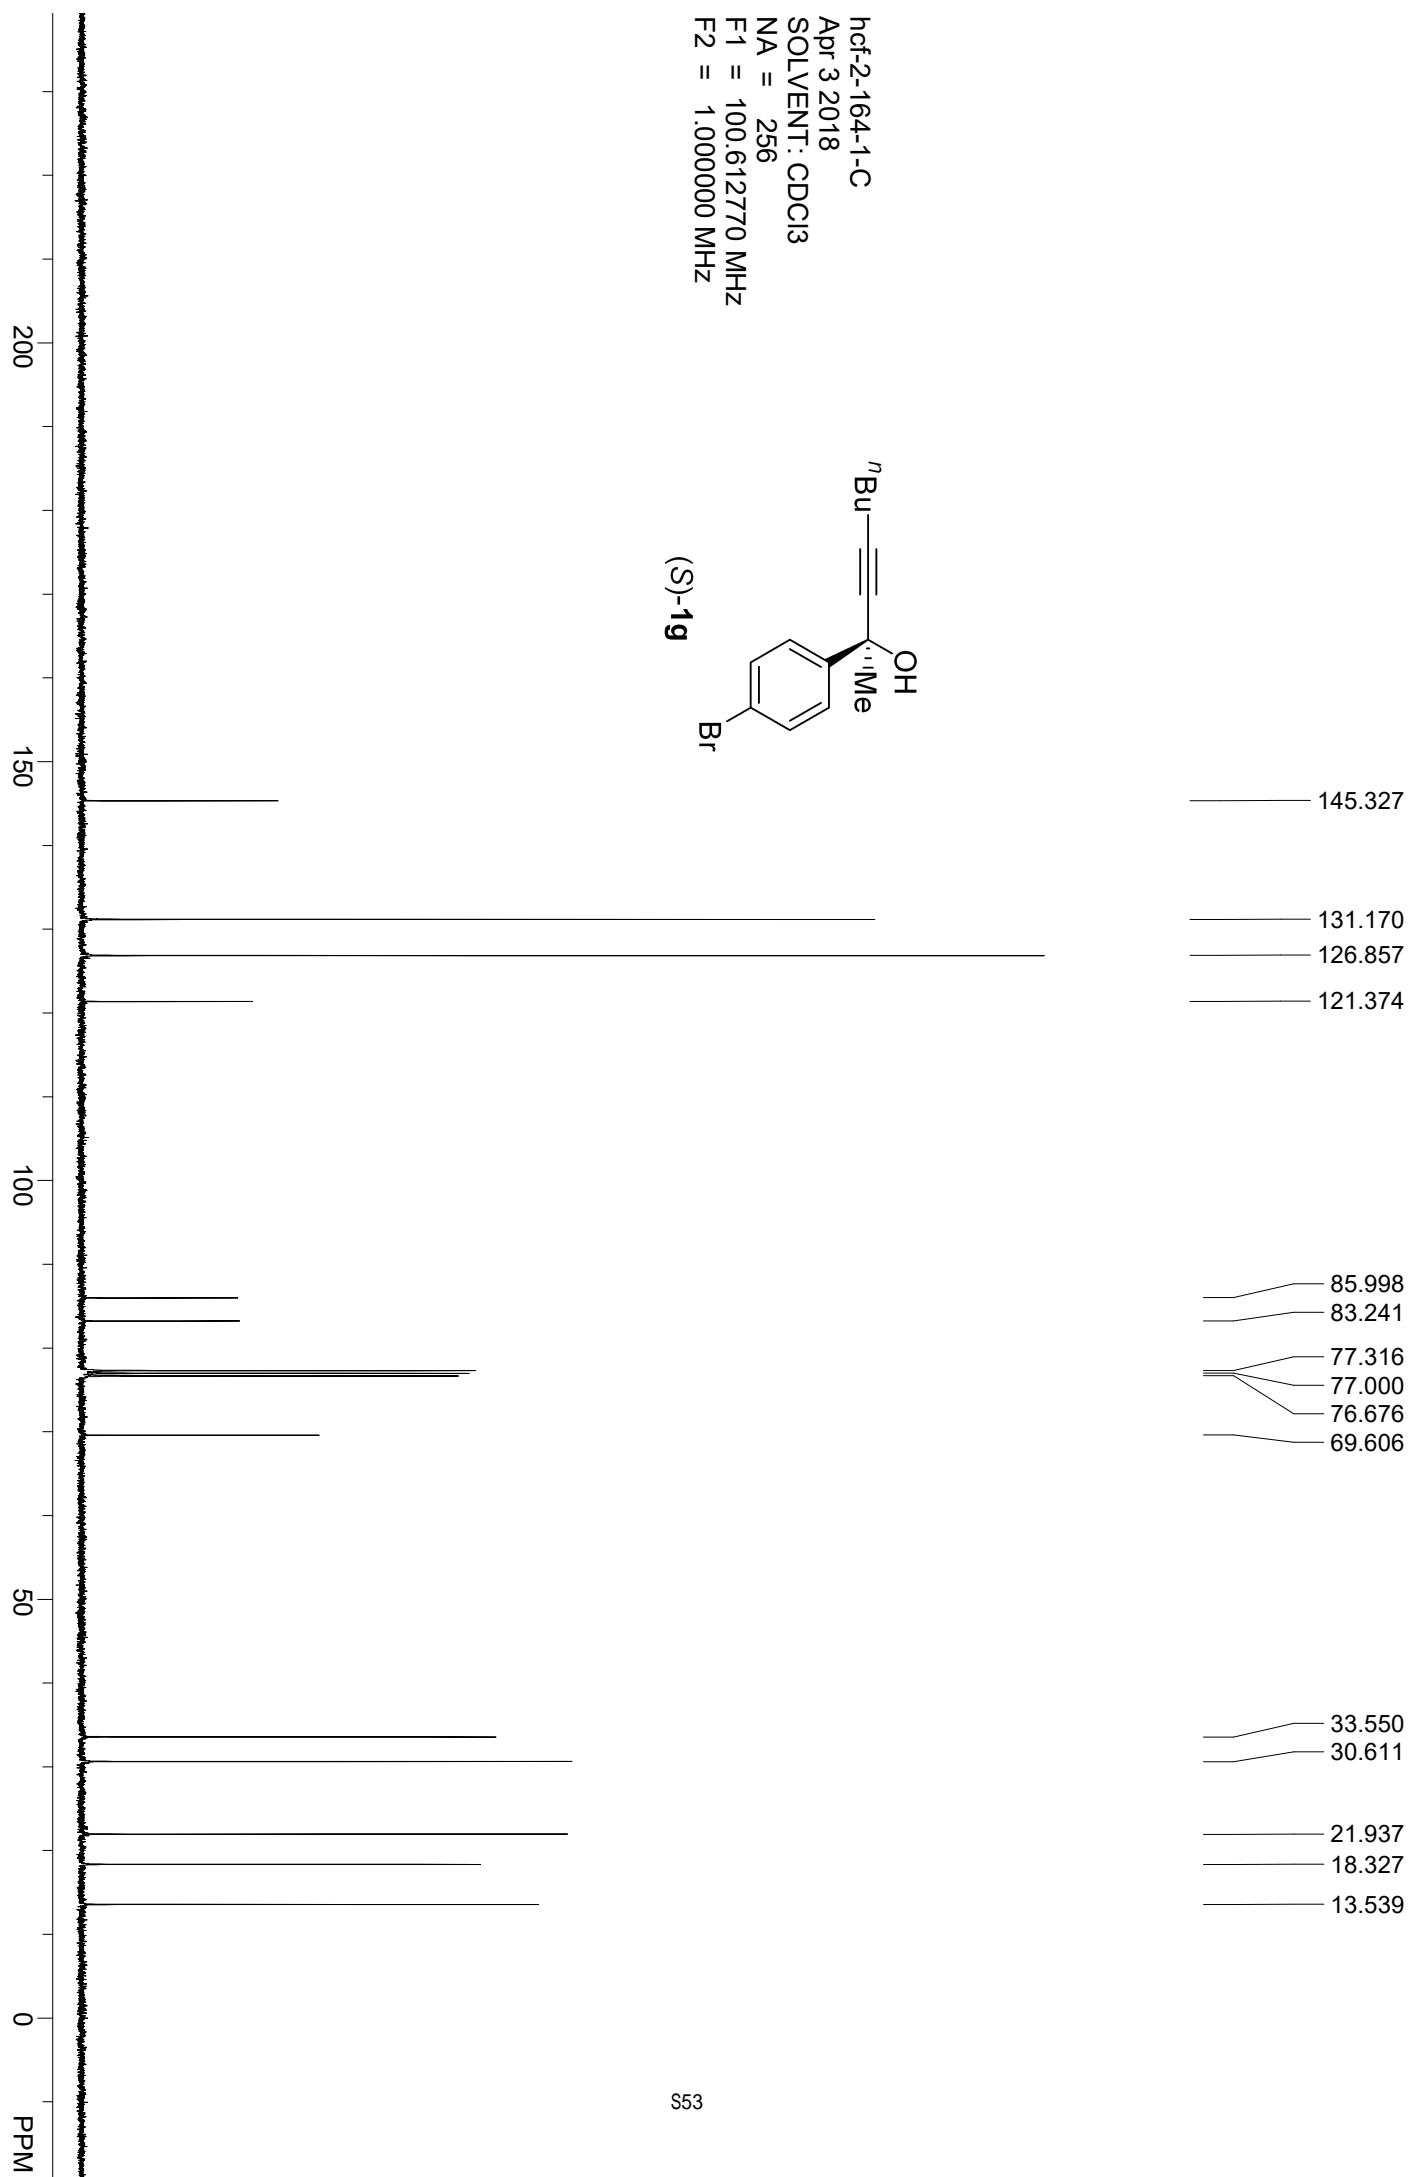

# hcf-2-164-1

实验时间: 2018-04-03, 13:50:12

报告时间: 2018-04-03, 14:10:49

谱图文件: D:\HPLC\s1f\zwf-2018-04-02\hcf-2-164-1-As-h-98-2-1-214.org

实验内容简介:

As-h 98:2

214nm 1.0ml/min

色谱图 (hcf-2-164-1-As-h-98-2-1-214.org)

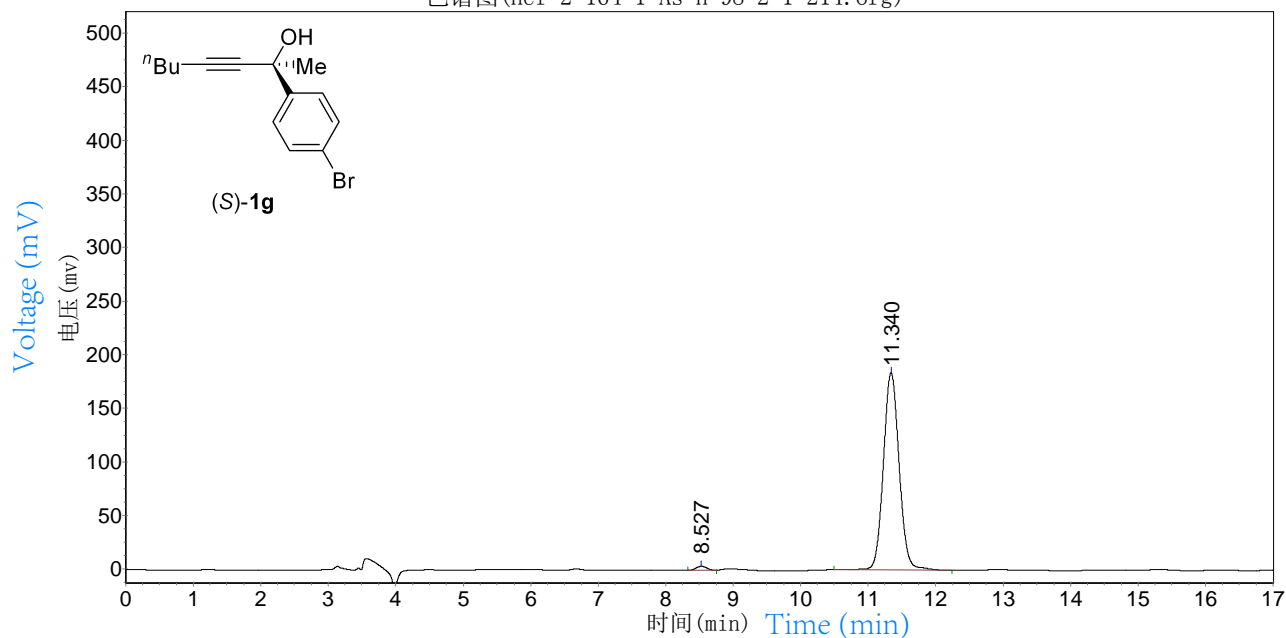

分析结果表

| 峰号 | 峰名 | 保留时间 RT [min] | 峰高 Height  | 峰面积 Area    | 含量 Area % |
|----|----|---------------|------------|-------------|-----------|
| 1  |    | 8.527         | 3716.220   | 39677.426   | 1.3138    |
| 2  |    | 11.340        | 183960.844 | 2980311.500 | 98.6862   |
| 总计 |    |               | 187677.063 | 3019988.926 | 100.0000  |

# zwf-1-68

实验时间: 2018-04-03, 13:34:01

报告时间: 2018-04-03, 13:51:29

谱图文件: D:\HPLC\s1f\zwf-2018-04-02\zwf-1-68-As-h-98-2-1-214.org

实验内容简介:

As-h 98:2

214nm 1.0ml/min

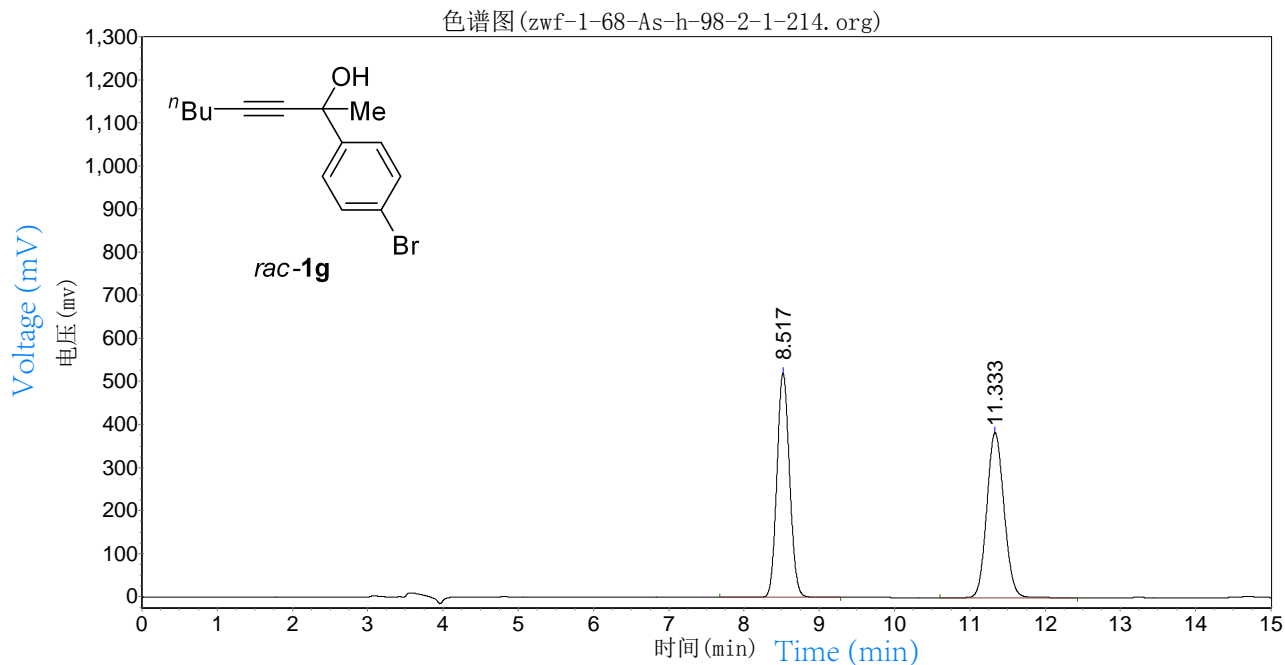

## 分析结果表

| 峰号 | 峰名 | 保留时间 RT [min] | 峰高 Height  | 峰面积 Area     | 含量 Area % |
|----|----|---------------|------------|--------------|-----------|
| 1  |    | 8.517         | 521300.813 | 6087377.000  | 50.0528   |
| 2  |    | 11.333        | 383455.000 | 6074537.500  | 49.9472   |
| 总计 |    |               | 904755.813 | 12161914.500 | 100.0000  |

- 8.118
- 7.864
- 7.857
- 7.854
- 7.844
- 7.823
- 7.814
- 7.755
- 7.751
- 7.734
- 7.730
- 7.499
- 7.487
- 7.482
- 7.472
- 7.463
- 7.459
- 7.249

ZWI-11-59-1-H  
 Apr 2 2018  
 SOLVENT: cdcl3  
 NA = 8  
 F1 = 399.749542 MHz  
 F2 = 100.526031 MHz

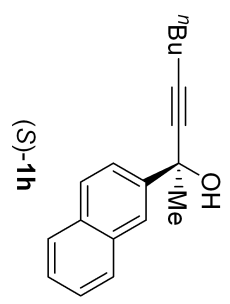

- 2.425
- 2.415
- 2.332
- 2.315
- 2.297
- 1.825
- 1.583
- 1.573
- 1.566
- 1.547
- 1.530
- 1.509
- 1.492
- 1.473
- 1.454
- 1.436
- 0.961
- 0.943
- 0.925
- 0.000

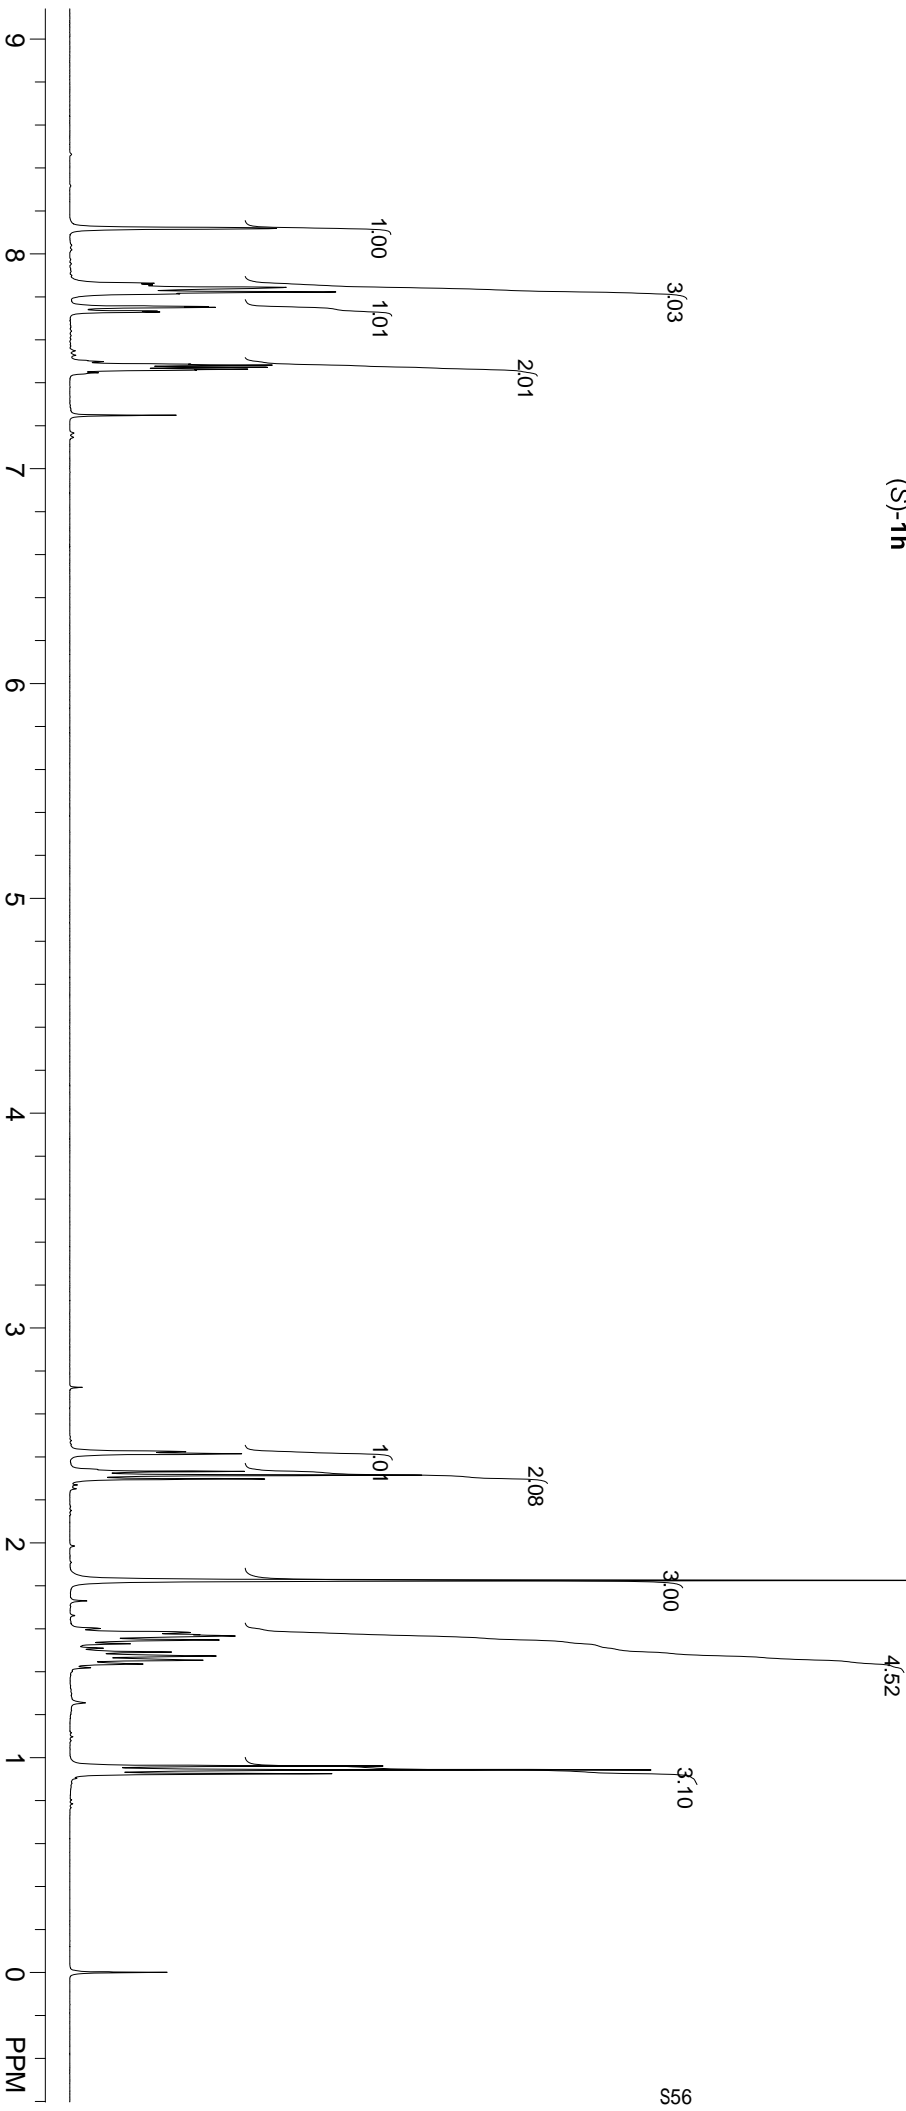



zwl-11-59-1-C  
Apr 2 2018  
SOLVENT: cdcl3  
NA = 1000  
F1 = 100.527557 MHZ  
F2 = 399.749146 MHZ

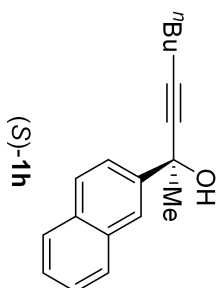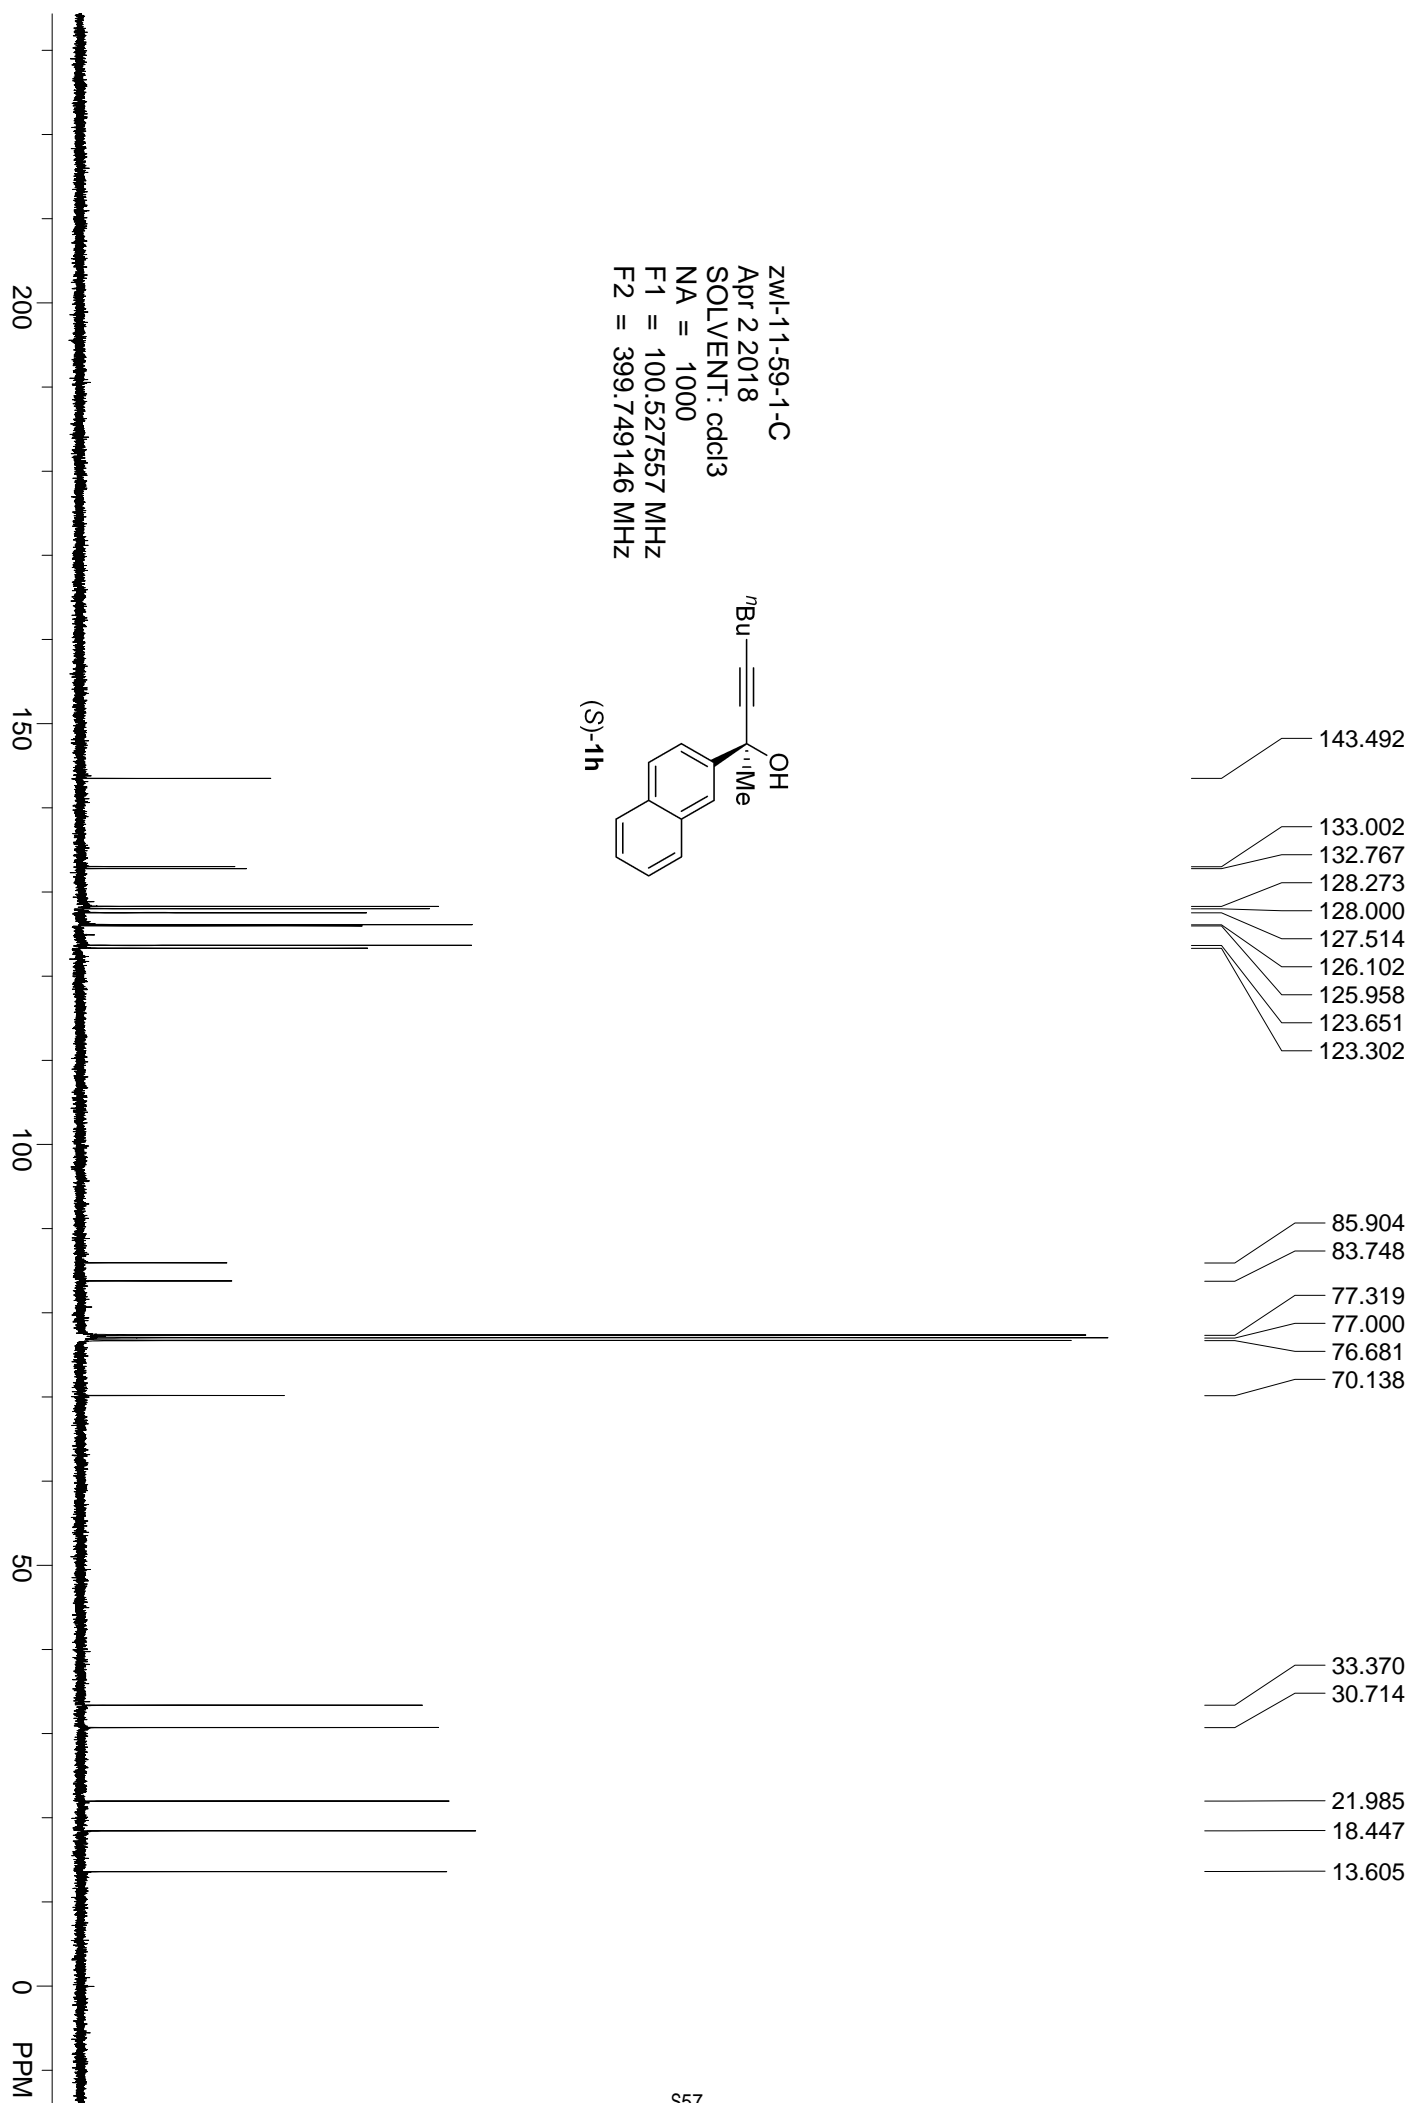

# zw1-11-59-1-AS-H-95-5-1.3-214

实验时间: 2018-04-06, 16:58:27  
谱图文件: E:\data\zwf\zw1-11-59-1.org

报告时间: 2018-04-06, 17:07:48

实验内容简介:

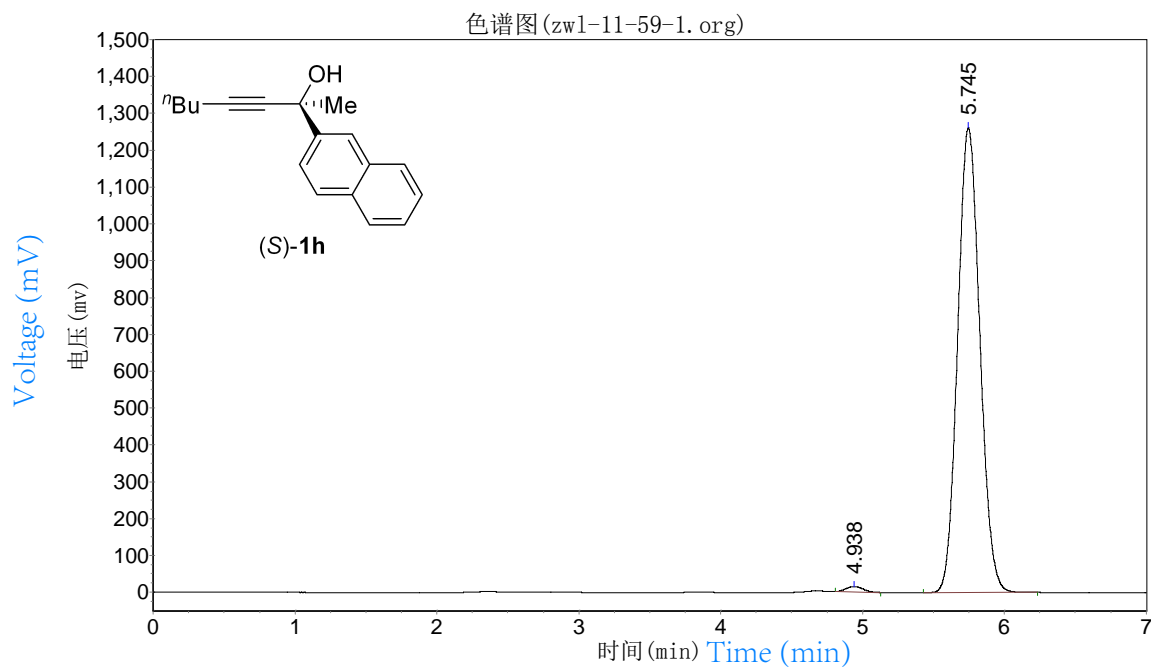

分析结果表

| 峰号 | 峰名 | 保留时间 RT [min] | 峰高 Height   | 峰面积 Area     | 含量 Area % |
|----|----|---------------|-------------|--------------|-----------|
| 1  |    | 4.938         | 14837.720   | 122513.195   | 0.8860    |
| 2  |    | 5.745         | 1260740.625 | 13704575.000 | 99.1140   |
| 总计 |    |               | 1275578.345 | 13827088.195 | 100.0000  |

## zw1-11-62-1-rac-AS-H-95-5-1.3-214

实验时间: 2018-04-13, 13:24:34  
谱图文件: E:\data\zwf\zw1-11-62-1-rac.org

实验者:  
报告时间: 2018-04-13, 14:16:18  
积分方法: 面积归一法

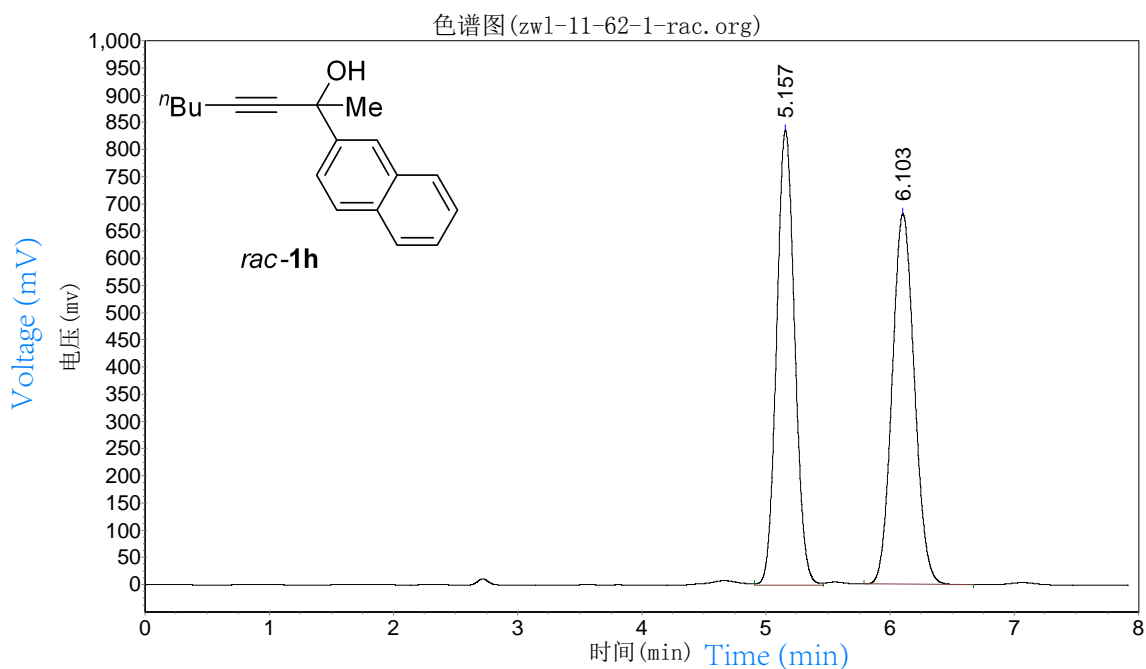

分析结果表

| 峰号 | 峰名 | 保留时间 RT [min] | 峰高 Height   | 峰面积 Area     | 含量 Area % |
|----|----|---------------|-------------|--------------|-----------|
| 1  |    | 5.157         | 836917.063  | 8474005.000  | 50.0051   |
| 2  |    | 6.103         | 681487.188  | 8472274.000  | 49.9949   |
| 总计 |    |               | 1518404.250 | 16946279.000 | 100.0000  |

zwf-5-025-1  
Dec 14 2018  
SOLVENT: CDCI3  
NA = 4  
F1 = 400.132477 MHz  
F2 = 1.000000 MHz

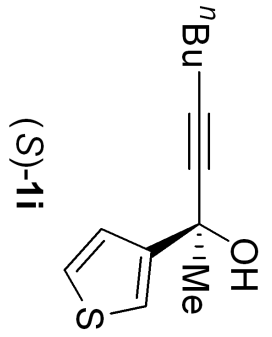

- 7.361
- 7.358
- 7.267
- 7.255
- 7.248
- 7.196
- 7.183

- 2.267
- 2.250
- 2.558
- 2.233
- 1.752
- 1.556
- 1.539
- 1.521
- 1.502
- 1.484
- 1.466
- 1.448
- 1.430
- 1.412
- 1.393
- 0.936
- 0.919
- 0.901
- 0.000

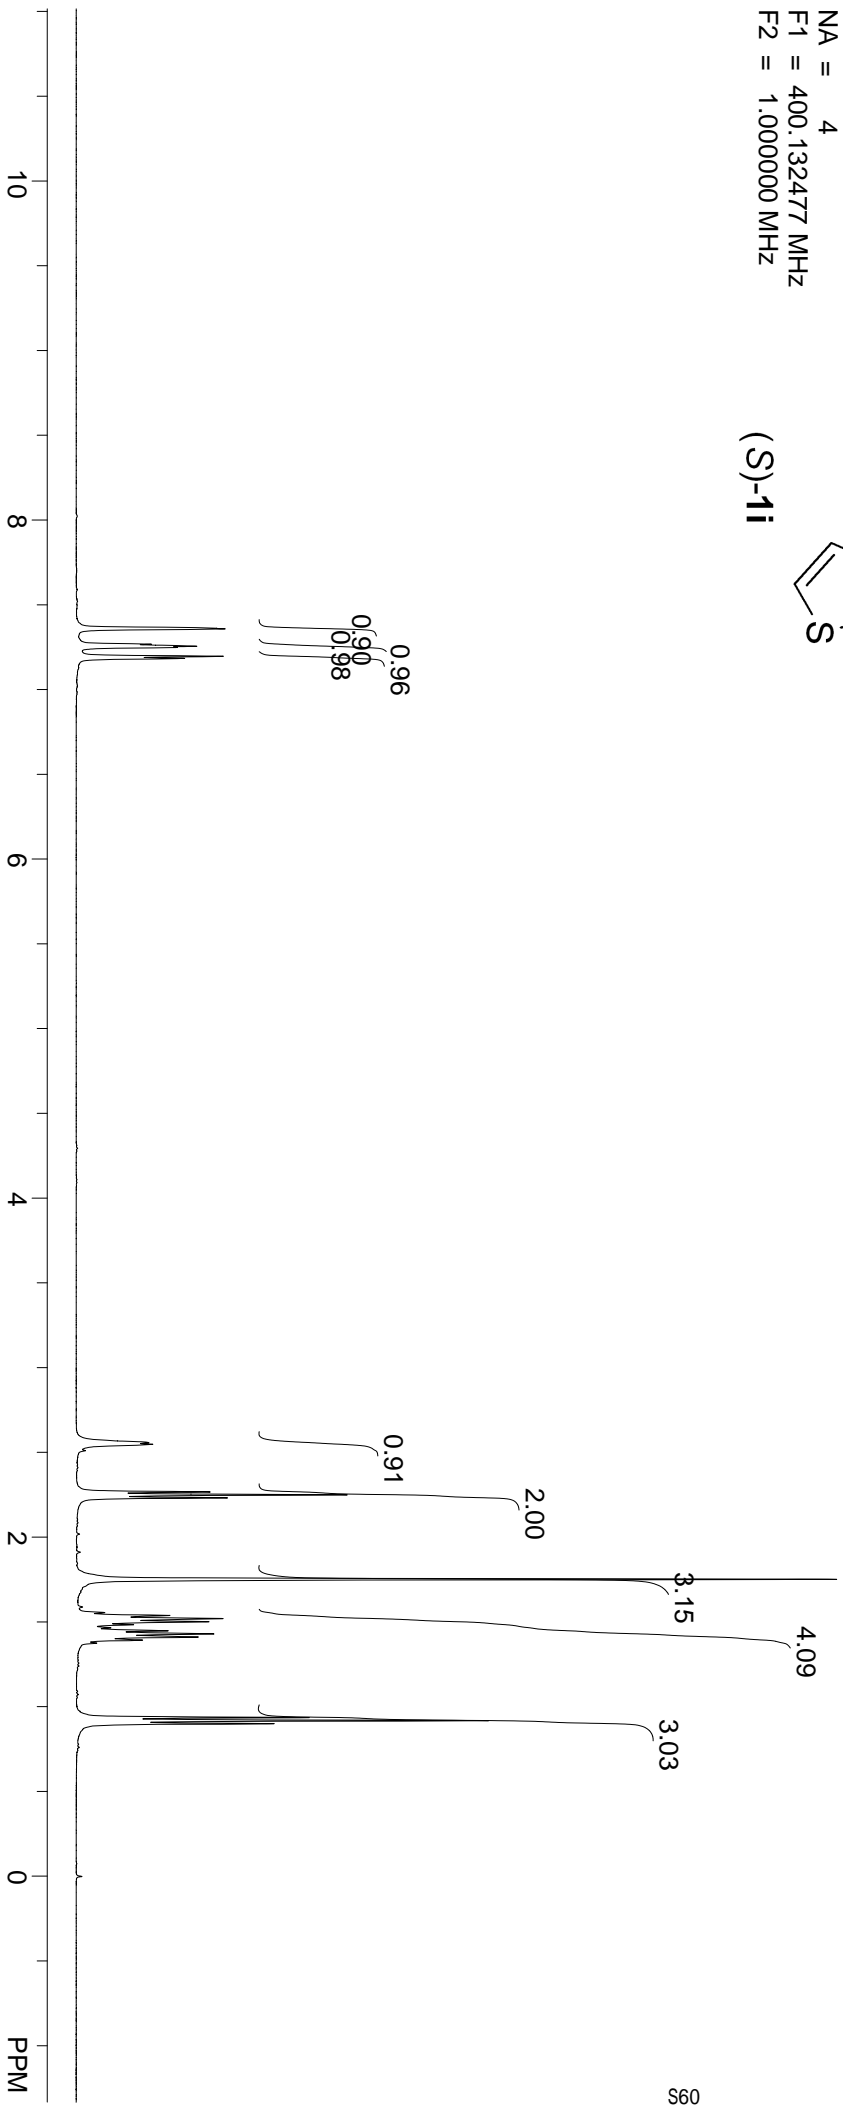

Zwf-5-025-1  
Dec 22 2018  
SOLVENT: CDCl3  
NA = 200  
F1 = 100.612770 MHz  
F2 = 1.000000 MHz

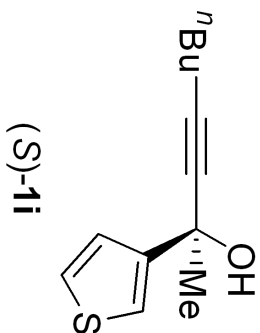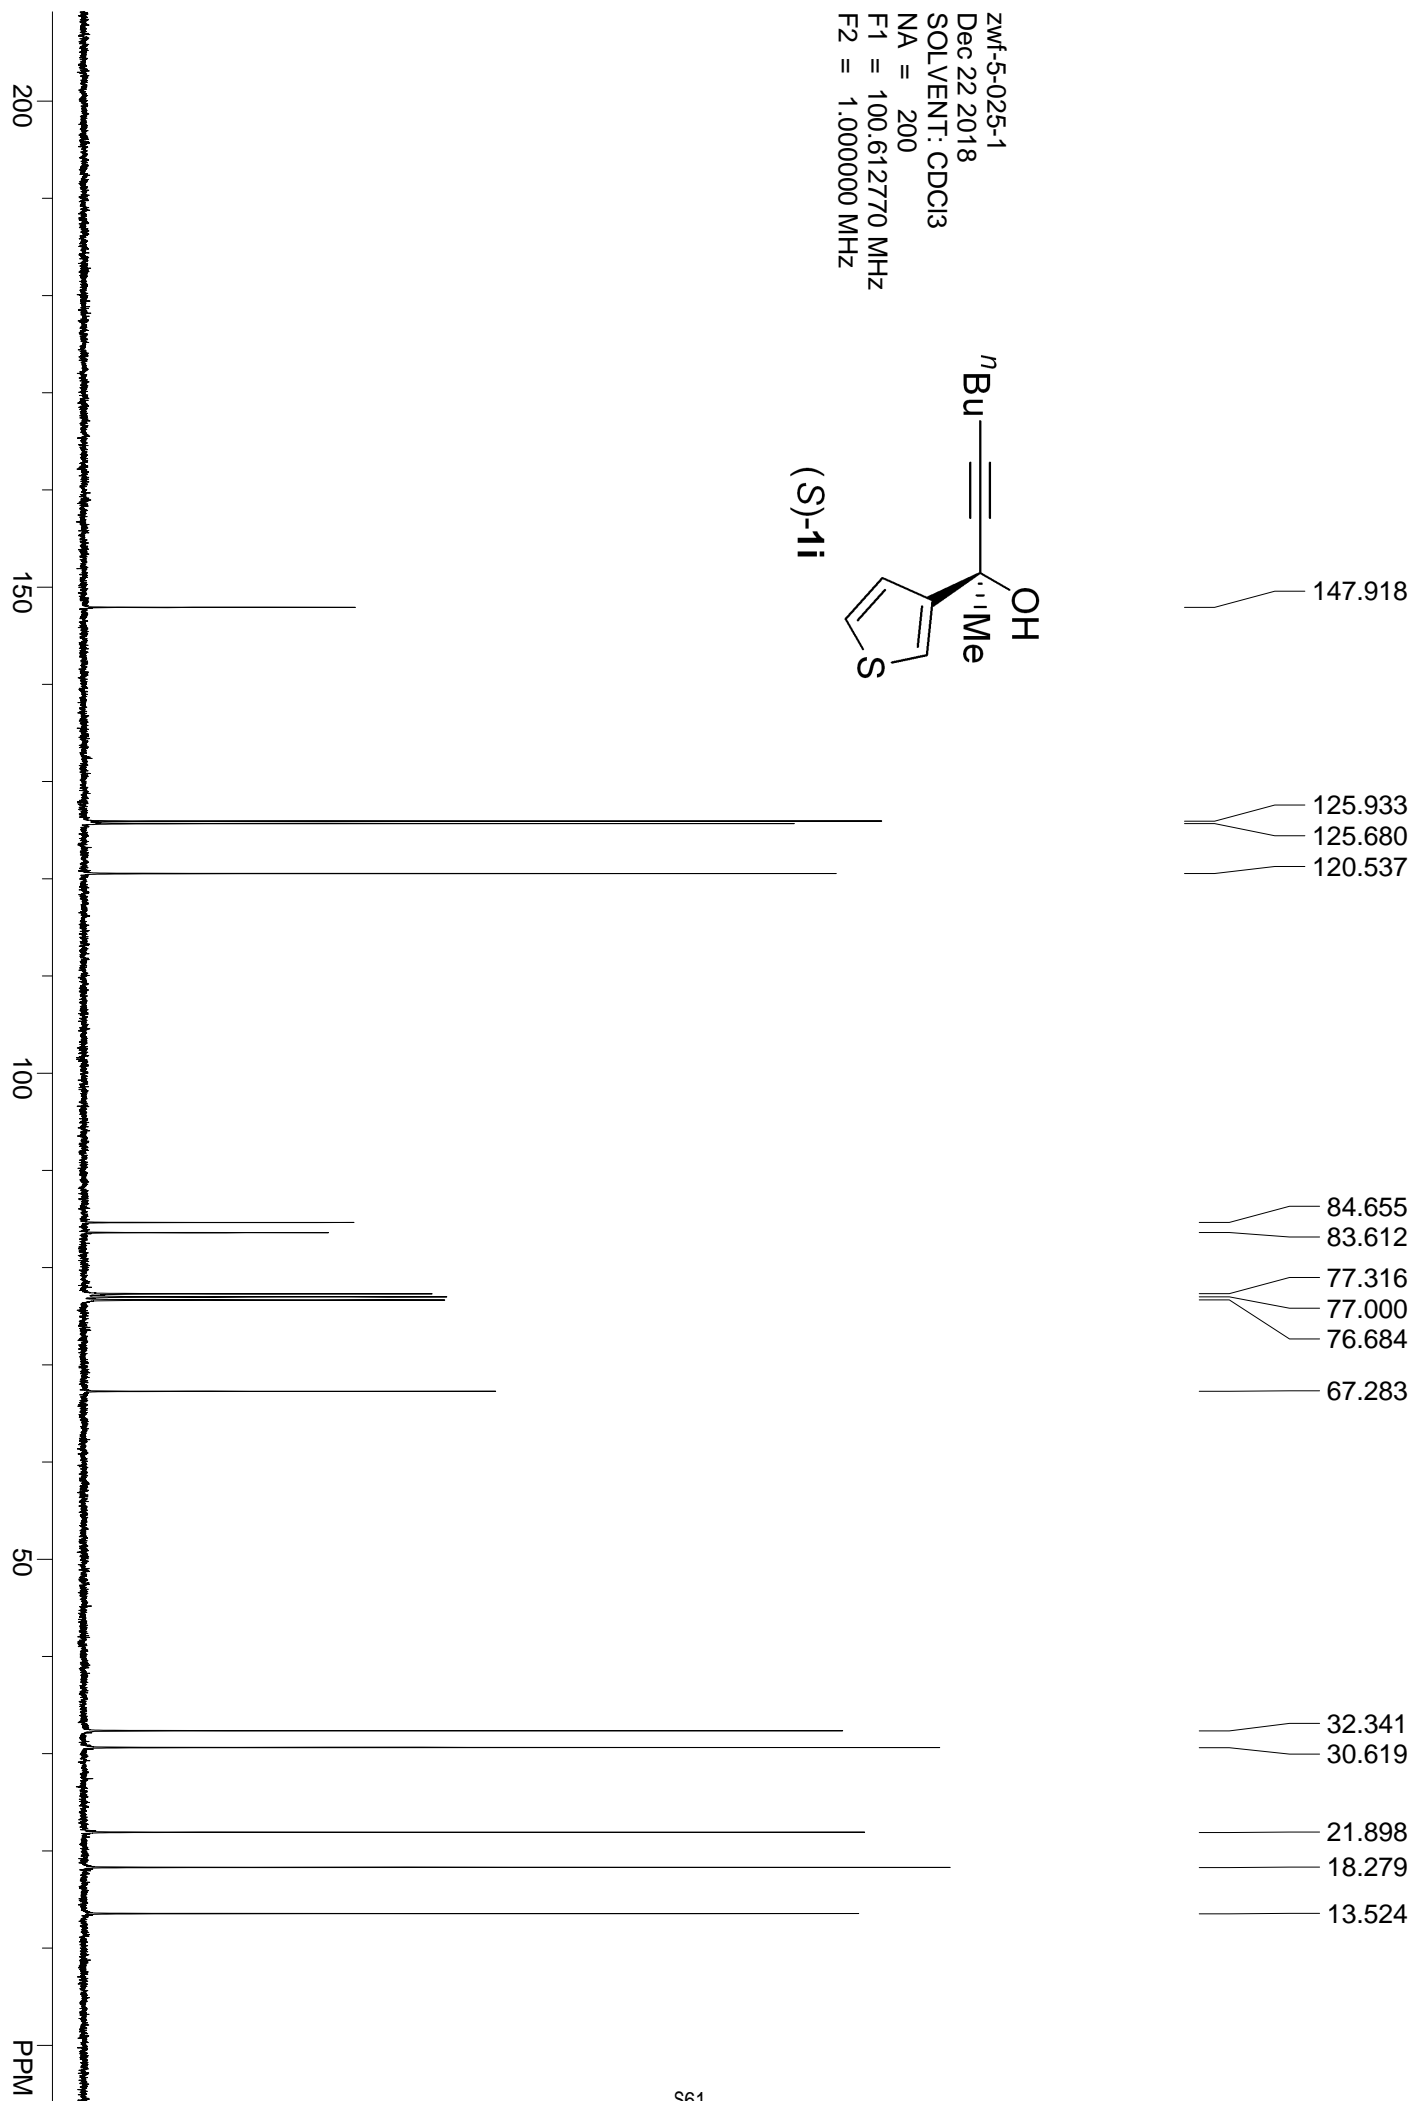

# Area Percent Report

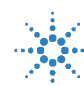

Agilent Technologies

Sample name: zwf-5-025-1-AS-H-98-2-1.0-214

Data file: C:\Users\Public\Documents\ChemStation\1\Data\zwf-allenioc acid\_LC 2018-12-22 17-24-32\003-P1-C1-zwf-5-025-1.D

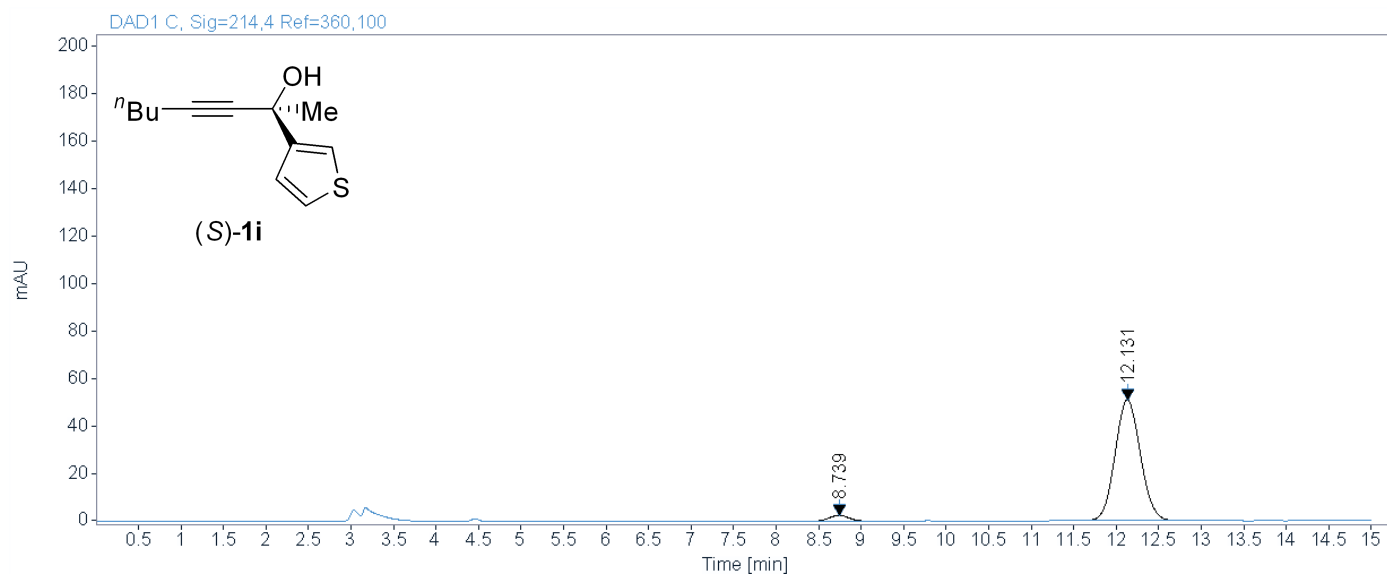

Signal: DAD1 C, Sig=214,4 Ref=360,100

| RT [min] | Width [min] | Height  | Area      | Area%    |
|----------|-------------|---------|-----------|----------|
| 8.739    | 0.2567      | 2.4698  | 40.7896   | 3.7103   |
| 12.131   | 0.3227      | 50.8951 | 1058.5587 | 96.2897  |
| Sum      |             |         | 1099.3483 | 100.0000 |

# Area Percent Report

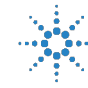

Agilent Technologies

Sample name: zwf-5-025-1-rac-AS-H-98-2-1.0-214

Data file: C:\Users\Public\Documents\ChemStation\1\Data\zwf-allenioc acid\_LC 2018-12-22 17-24-32\004-P1-C2-zwf-5-025-1-rac.D

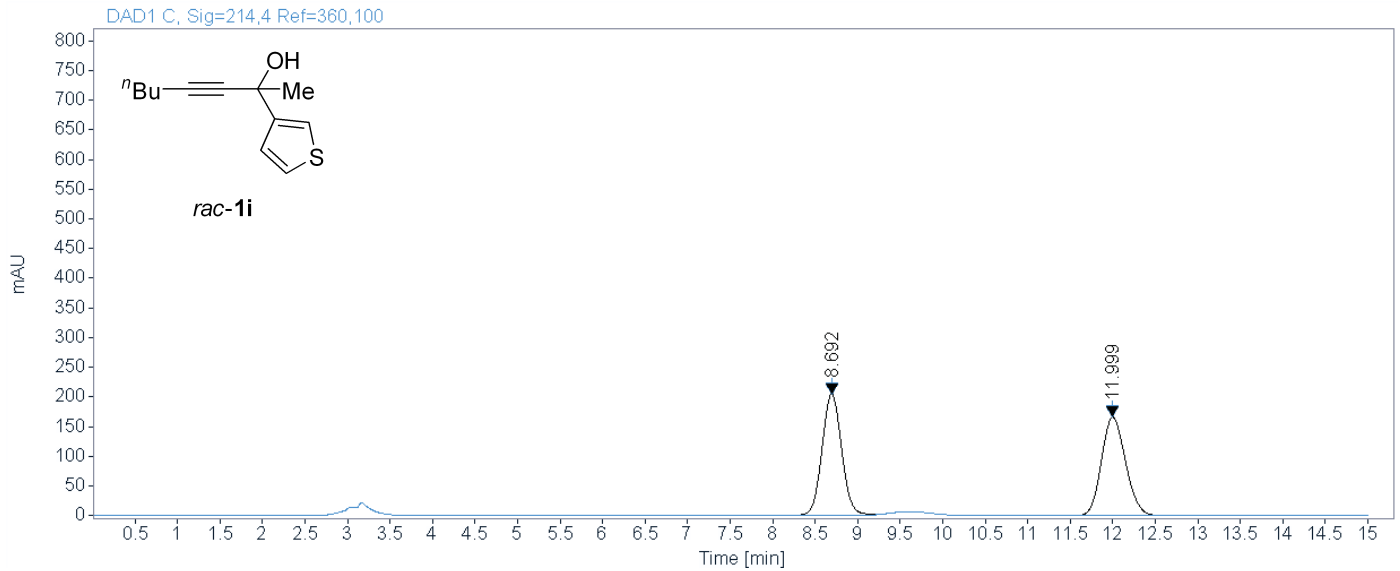

Signal: DAD1 C, Sig=214,4 Ref=360,100

| RT [min] | Width [min] | Height   | Area      | Area%    |
|----------|-------------|----------|-----------|----------|
| 8.692    | 0.2707      | 205.2032 | 3332.5664 | 50.3005  |
| 11.999   | 0.3091      | 166.2543 | 3292.7439 | 49.6995  |
| Sum      |             |          | 6625.3103 | 100.0000 |

Zwf-4-136-1  
Nov 10 2018  
SOLVENT: CDCl3  
NA = 4  
F1 = 400.130005 MHz  
F2 = 1.000000 MHz

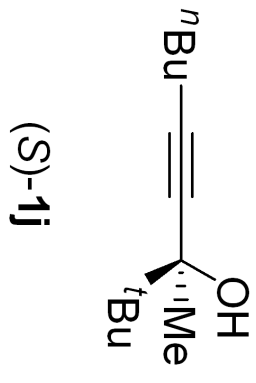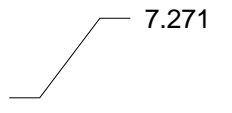

- 2.219
- 2.203
- 2.185
- 1.822
- 1.508
- 1.488
- 1.471
- 1.454
- 1.437
- 1.412
- 1.382
- 1.030
- 0.930
- 0.912
- 0.894
- 0.000

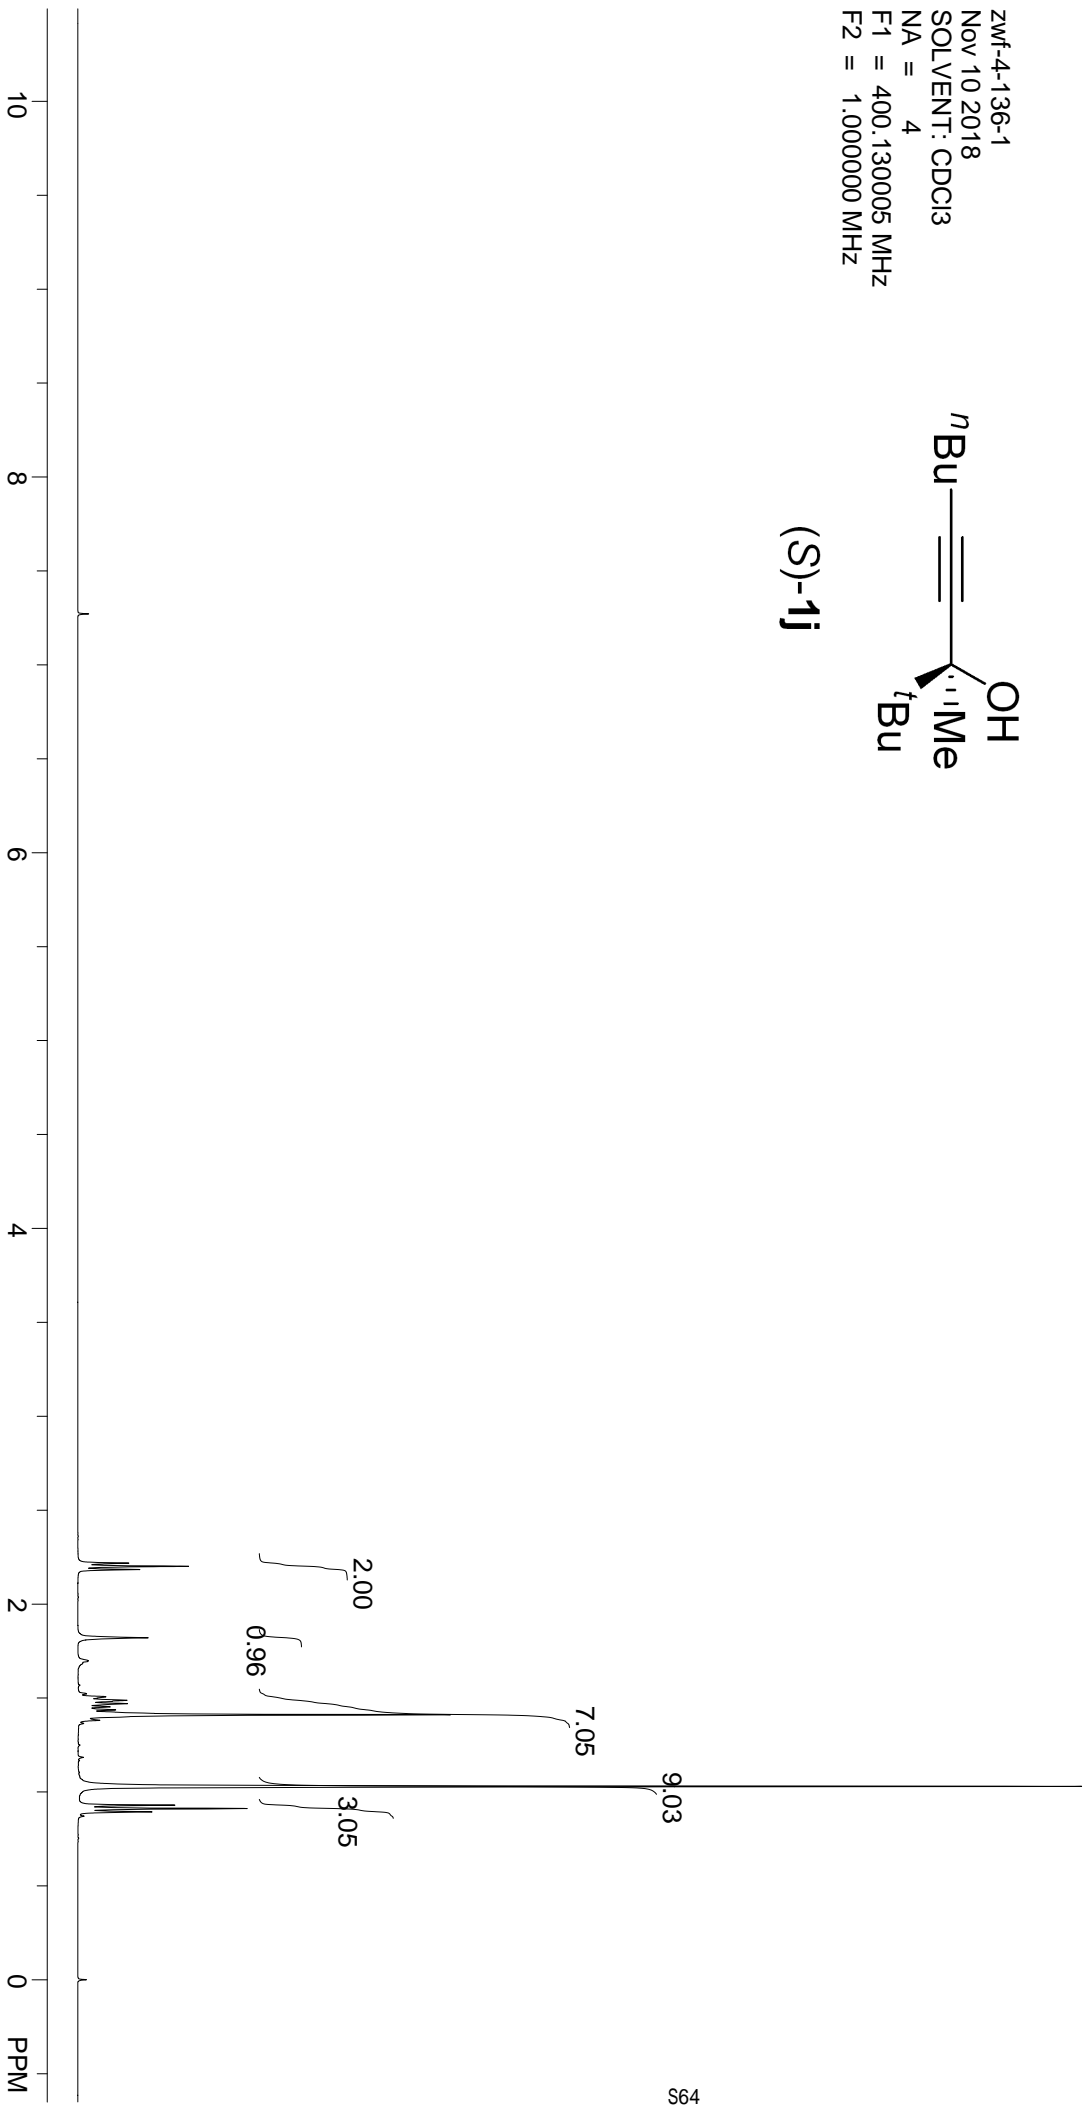



Zwf-4-136-1  
Nov 10 2018  
SOLVENT: CDCl3  
NA = 200  
F1 = 100.612770 MHz  
F2 = 1.000000 MHz

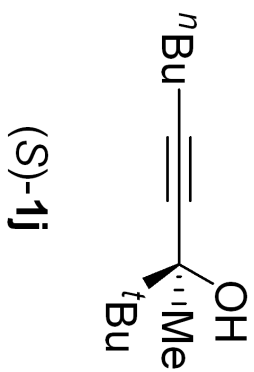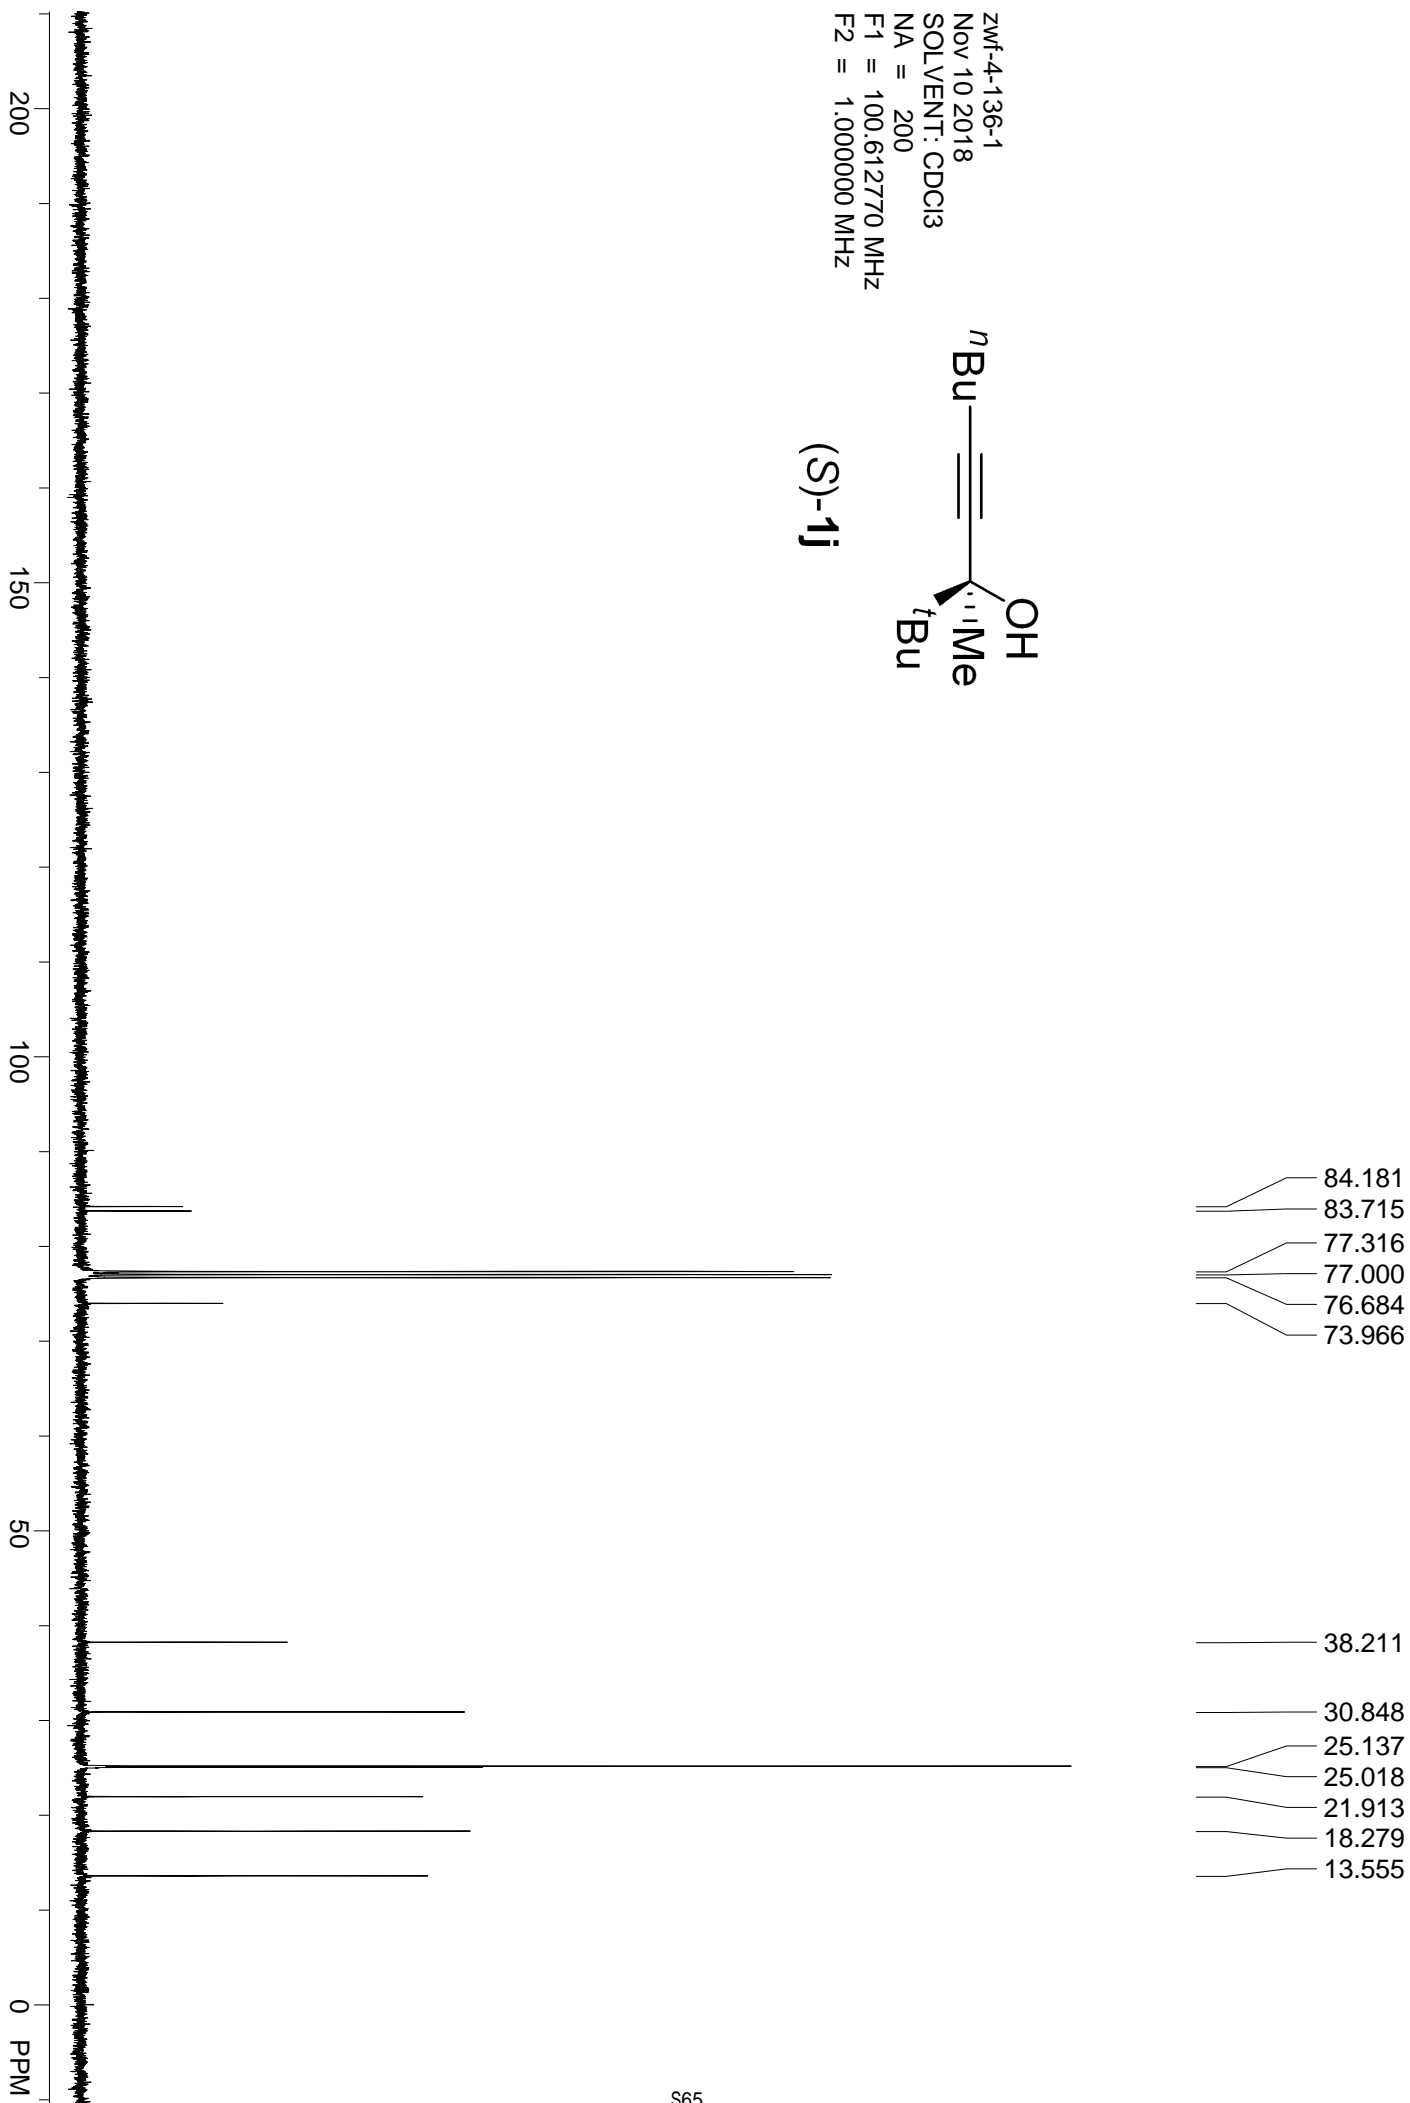

# Area Percent Report

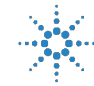

Agilent Technologies

Sample name: zwf-4-136-1-IC-98-1.0-214

Data file: C:\USERS\PUBLIC\DOCUMENTS\CHEMSTATION\1\DATA\ZWF\zwf-4-136-1-IC-98-2-1.0-214.D

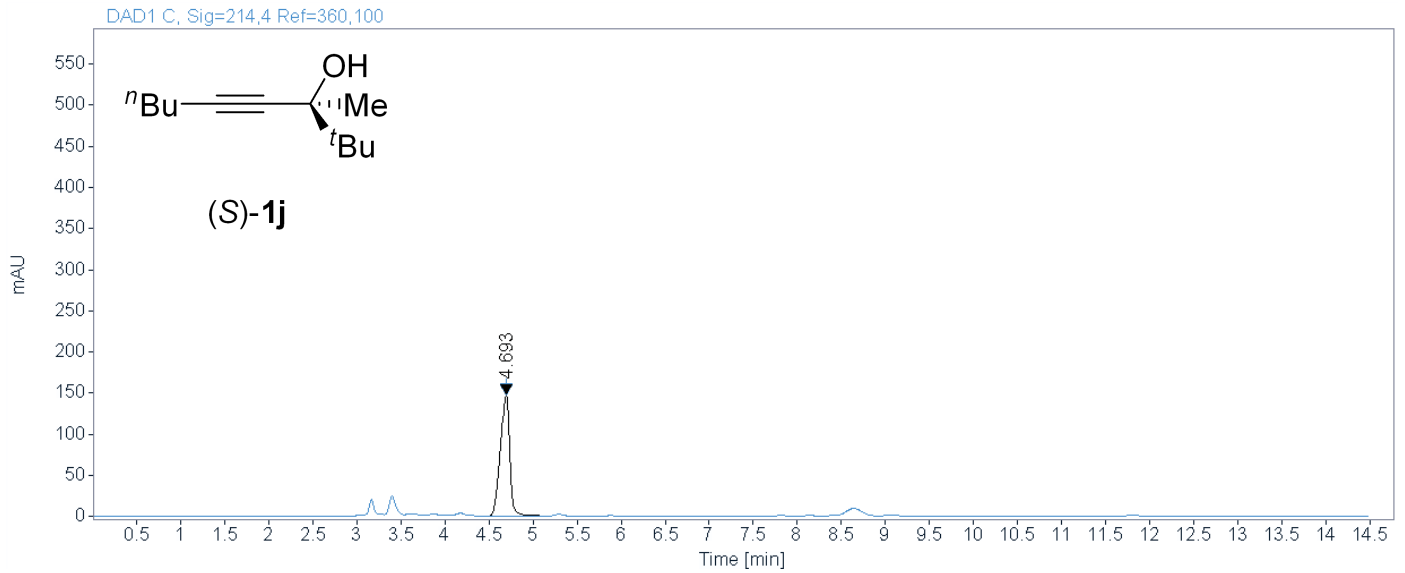

Signal: DAD1 C, Sig=214,4 Ref=360,100

| RT [min] | Width [min] | Height   | Area      | Area%    |
|----------|-------------|----------|-----------|----------|
| 4.693    | 0.1245      | 148.0412 | 1106.2639 | 100.0000 |
| Sum      |             |          | 1106.2639 | 100.0000 |

# Area Percent Report

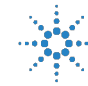

Agilent Technologies

Sample name: zwf-4-136-1-rac-IC-98-1.0-214

Data file: C:\USERS\PUBLIC\DOCUMENTS\CHEMSTATION\1\DATA\ZWF\zwf-4-136-1-rac-IC-98-2-1.0-214.D

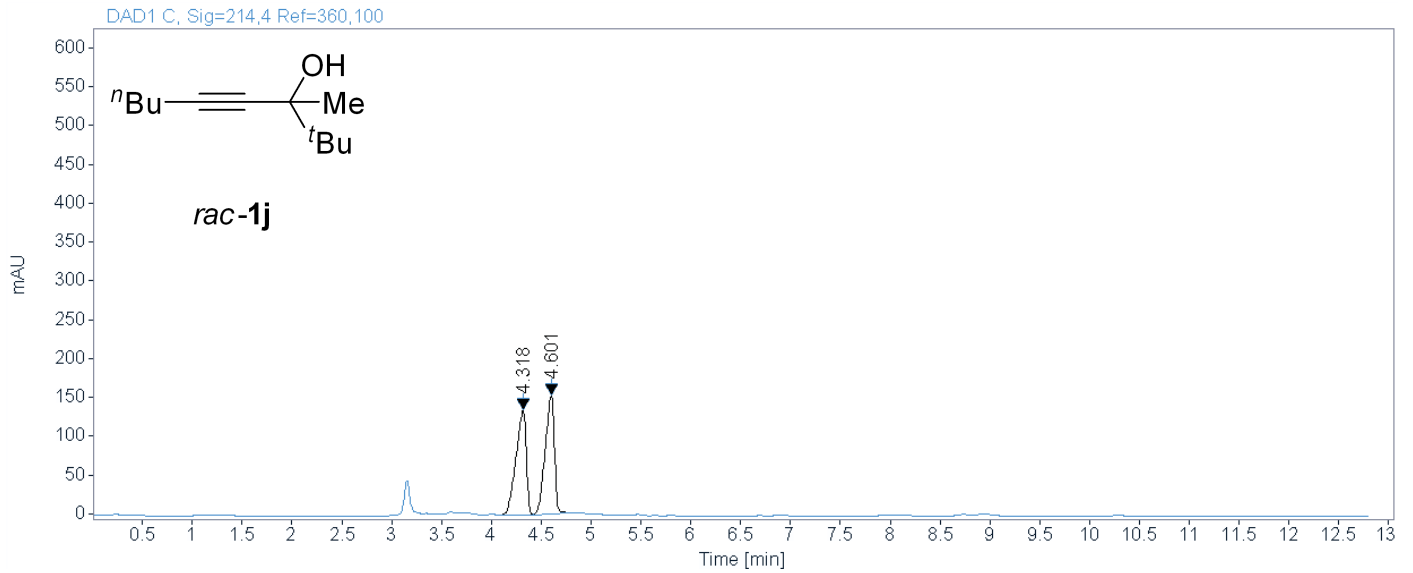

Signal: DAD1 C, Sig=214,4 Ref=360,100

| RT [min] | Width [min] | Height   | Area      | Area%    |
|----------|-------------|----------|-----------|----------|
| 4.318    | 0.1202      | 136.0092 | 980.8727  | 49.7126  |
| 4.601    | 0.1072      | 154.2787 | 992.2144  | 50.2874  |
| Sum      |             |          | 1973.0872 | 100.0000 |

zwf-3-049-1H  
Apr 18 2018  
SOLVENT: cdcl3  
NA = 4  
F1 = 399.749542 MHz  
F2 = 100.526031 MHz

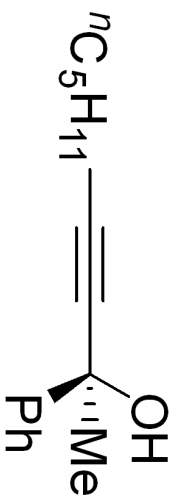

(S)-1k

7.653  
7.636  
7.348  
7.330  
7.312  
7.273  
7.254  
7.236

2.267  
2.249  
2.232  
2.563  
1.726  
1.578  
1.561  
1.544  
1.525  
1.507  
1.417  
1.402  
1.380  
1.363  
1.350  
1.333  
1.316  
1.298  
0.919  
0.901  
0.884  
0.000

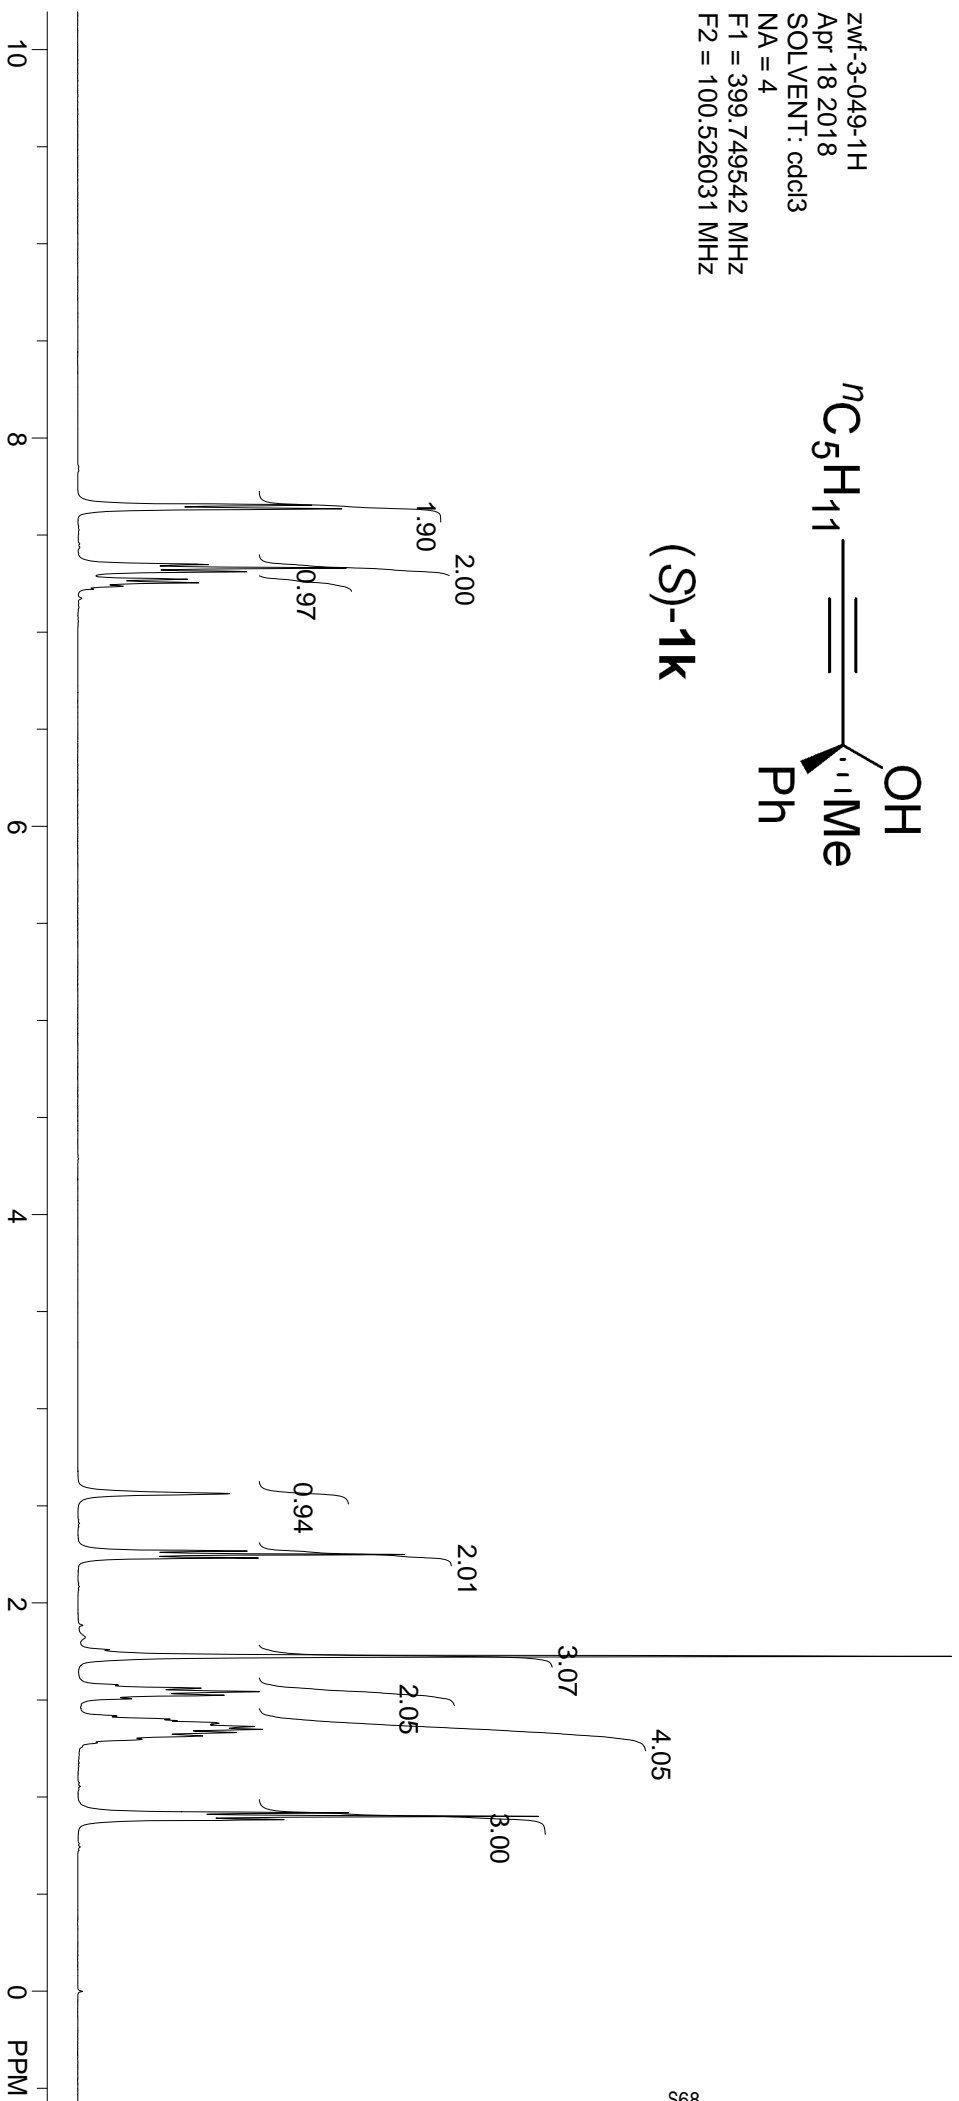

zwf-3-049-1C  
Apr 18 2018  
SOLVENT: cdcl3  
NA = 256  
F1 = 100.527557 MHz  
F2 = 399.749146 MHz

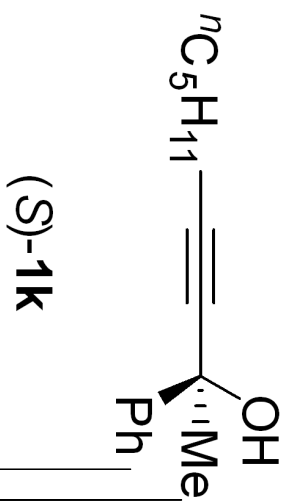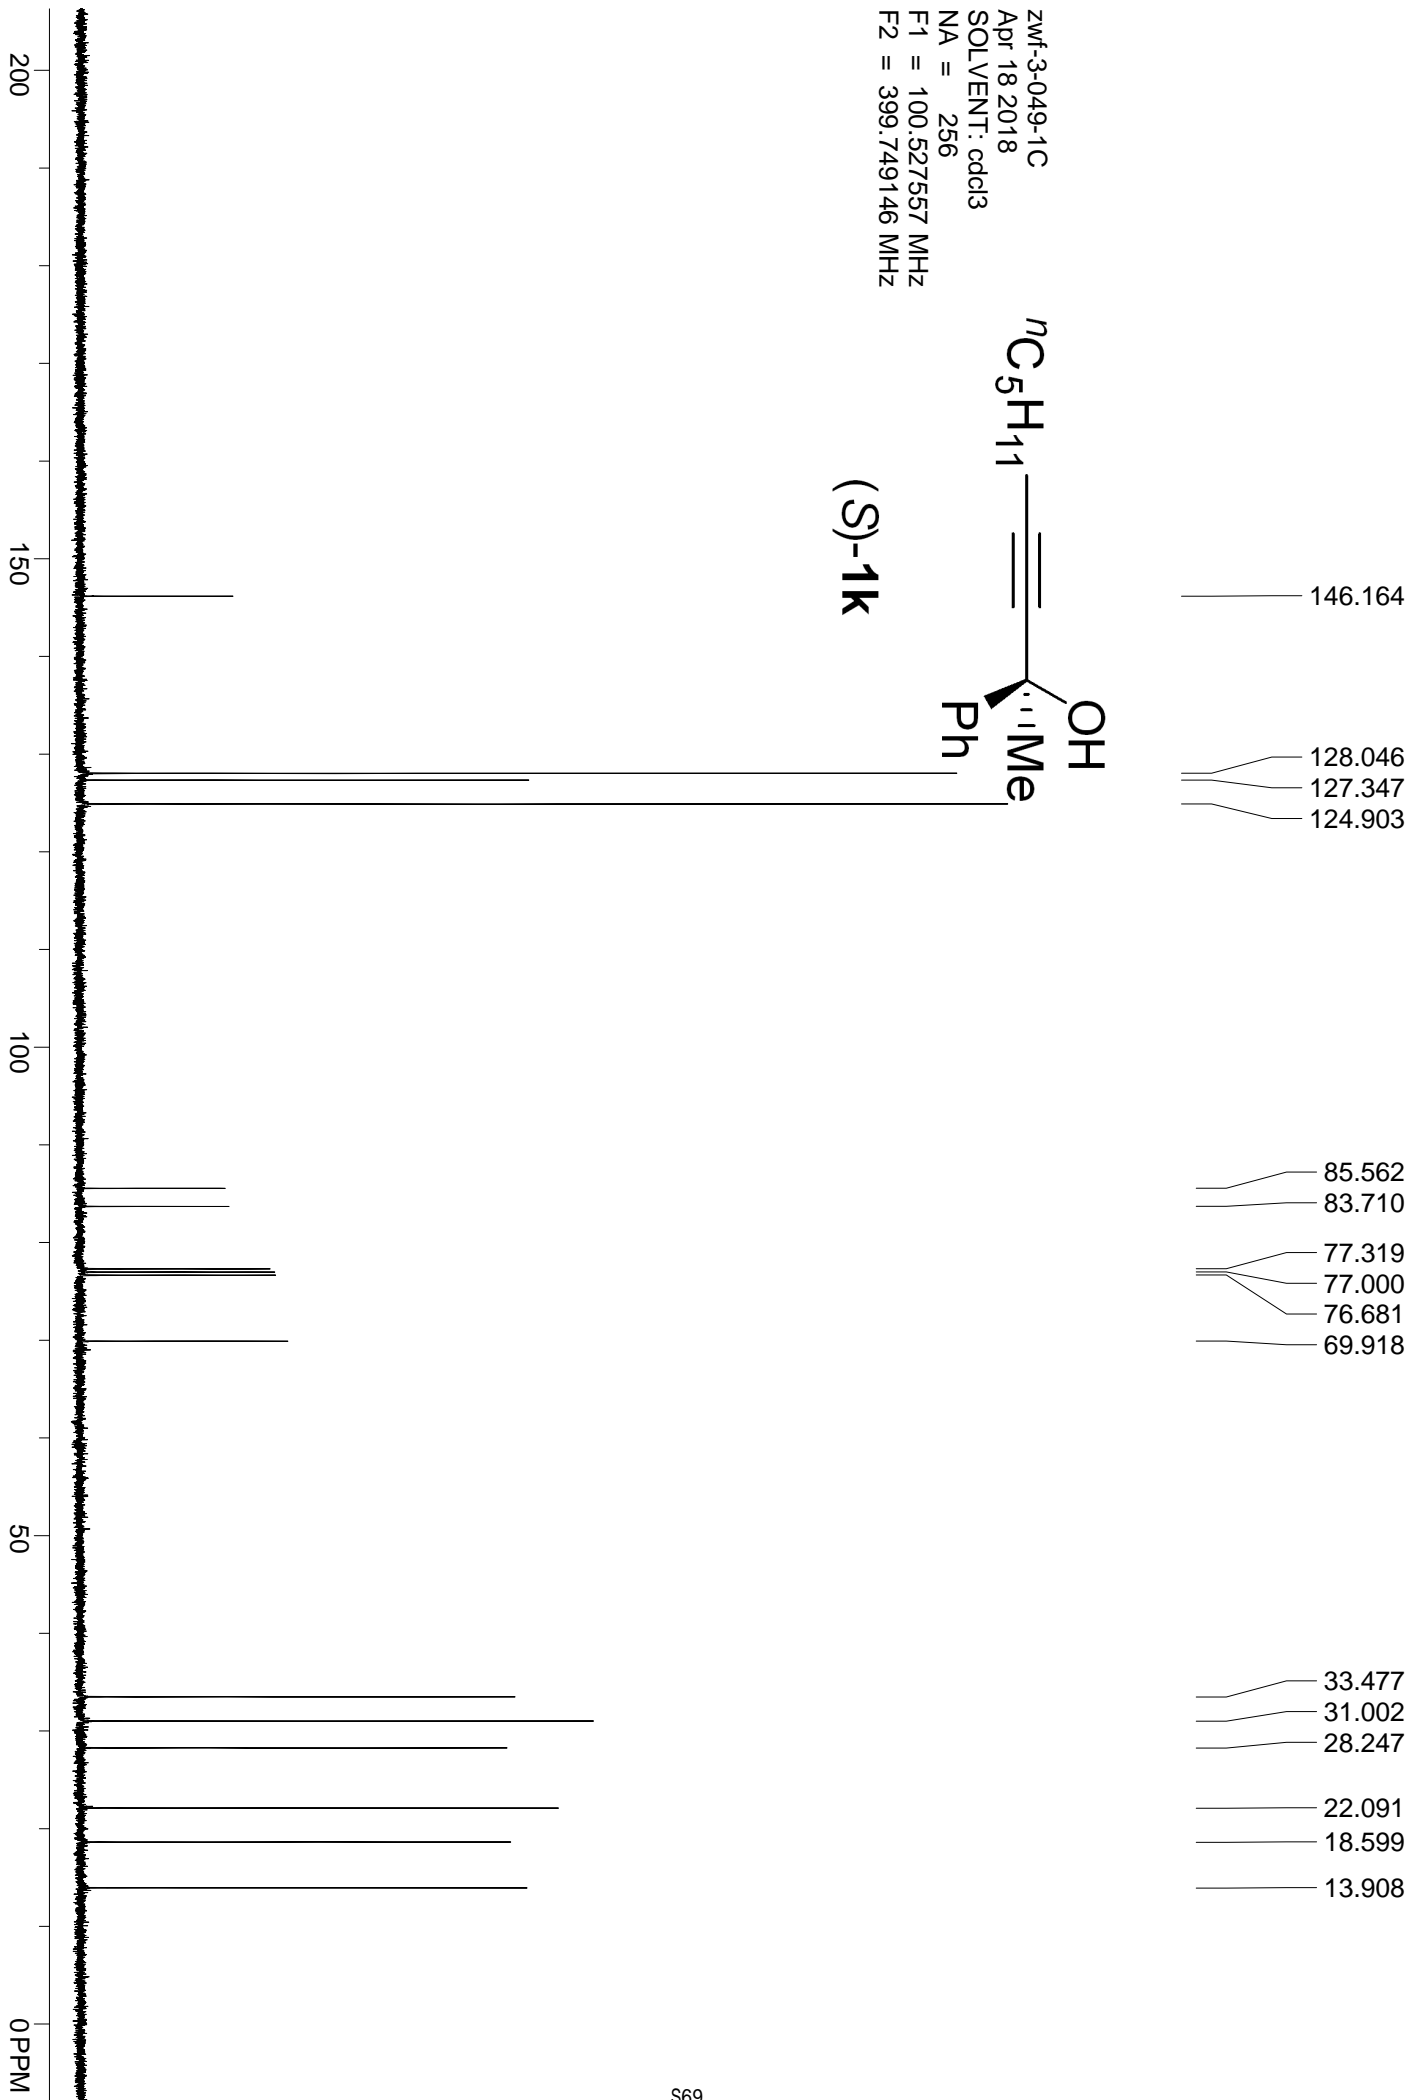

# zwf-3-049-1-AS-H-98-2-1.0-214

实验时间: 2018-04-18, 21:26:05  
谱图文件: E:\data\zwf\zwf-3-049-1a.org  
方法文件: E:\data\yaoyuan\0414.mtd

报告时间: 2018-04-18, 21:41:17

实验内容简介:

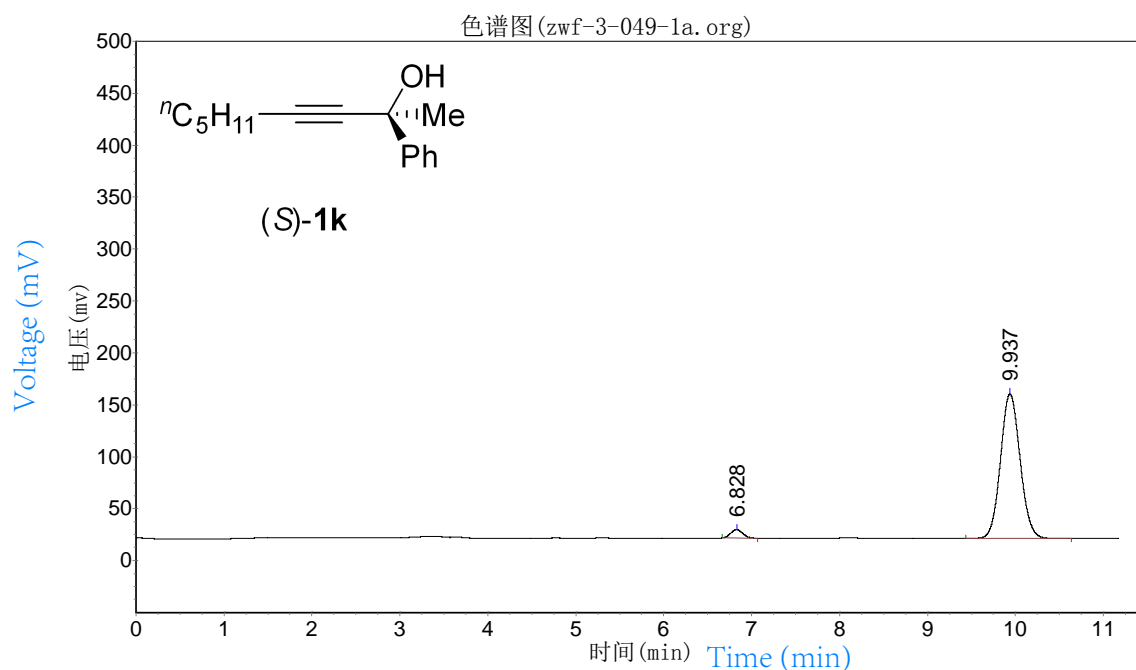

分析结果表

| 峰号 | 峰名 | 保留时间 RT [min] | 峰高 Height  | 峰面积 Area    | 含量 Area % |
|----|----|---------------|------------|-------------|-----------|
| 1  |    | 6.828         | 8095.054   | 78488.320   | 3.5182    |
| 2  |    | 9.937         | 139246.141 | 2152453.750 | 96.4818   |
| 总计 |    |               | 147341.194 | 2230942.070 | 100.0000  |

# zwf-3-049-1rac-AS-H-98-2-1.0-214

实验时间: 2018-04-18, 21:13:09  
谱图文件: E:\data\zwf\zwf-3-049-1rac.org  
方法文件: E:\data\yaoyuan\0414.mtd

报告时间: 2018-04-18, 21:27:31

实验内容简介:

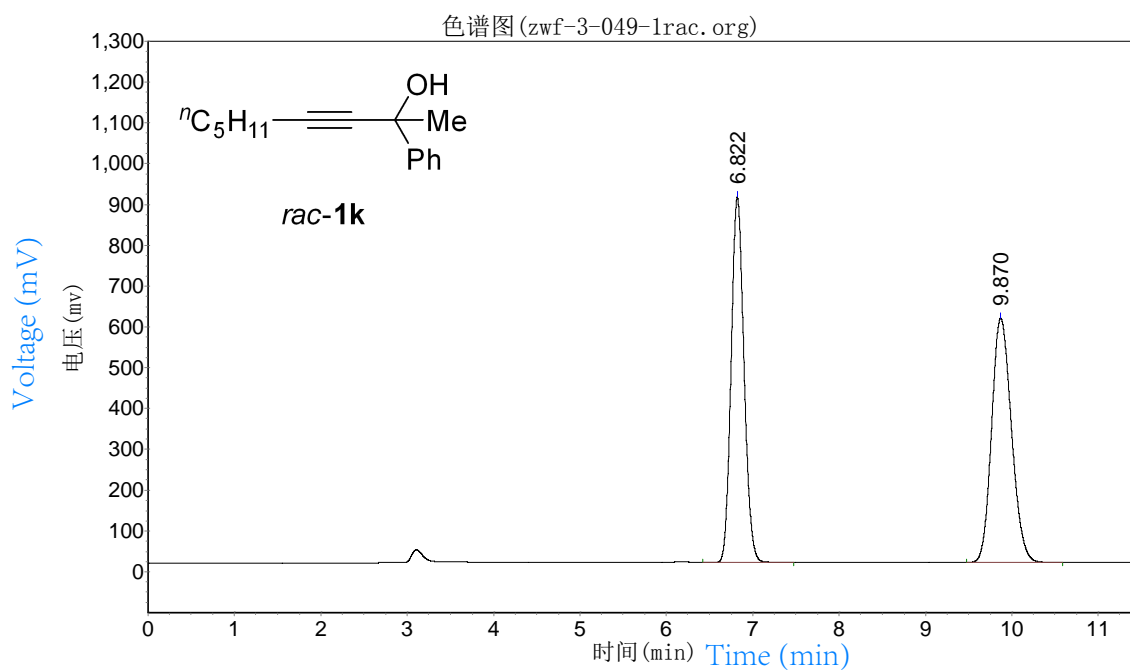

分析结果表

| 峰号 | 峰名 | 保留时间 RT [min] | 峰高 Height   | 峰面积 Area     | 含量 Area % |
|----|----|---------------|-------------|--------------|-----------|
| 1  |    | 6.822         | 896229.875  | 9276932.000  | 49.2526   |
| 2  |    | 9.870         | 598705.750  | 9558496.000  | 50.7474   |
| 总计 |    |               | 1494935.625 | 18835428.000 | 100.0000  |

7.656  
7.638  
7.352  
7.334  
7.315  
7.277  
7.258  
7.240  
7.231

2.275  
2.257  
2.240  
2.444  
1.731  
1.575  
1.558  
1.540  
1.521  
1.504  
1.441  
1.420  
1.406  
1.386  
1.368  
1.304  
1.296  
1.286  
0.908  
0.893  
0.875  
0.000

zwf-3-075-1H  
May 8 2018  
SOLVENT: cdcl3  
NA = 4  
F1 = 399.749542 MHz  
F2 = 100.526031 MHz

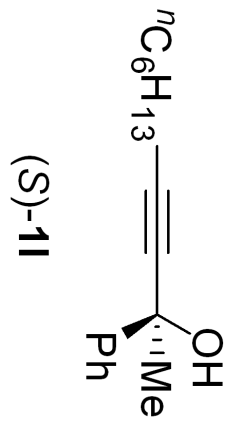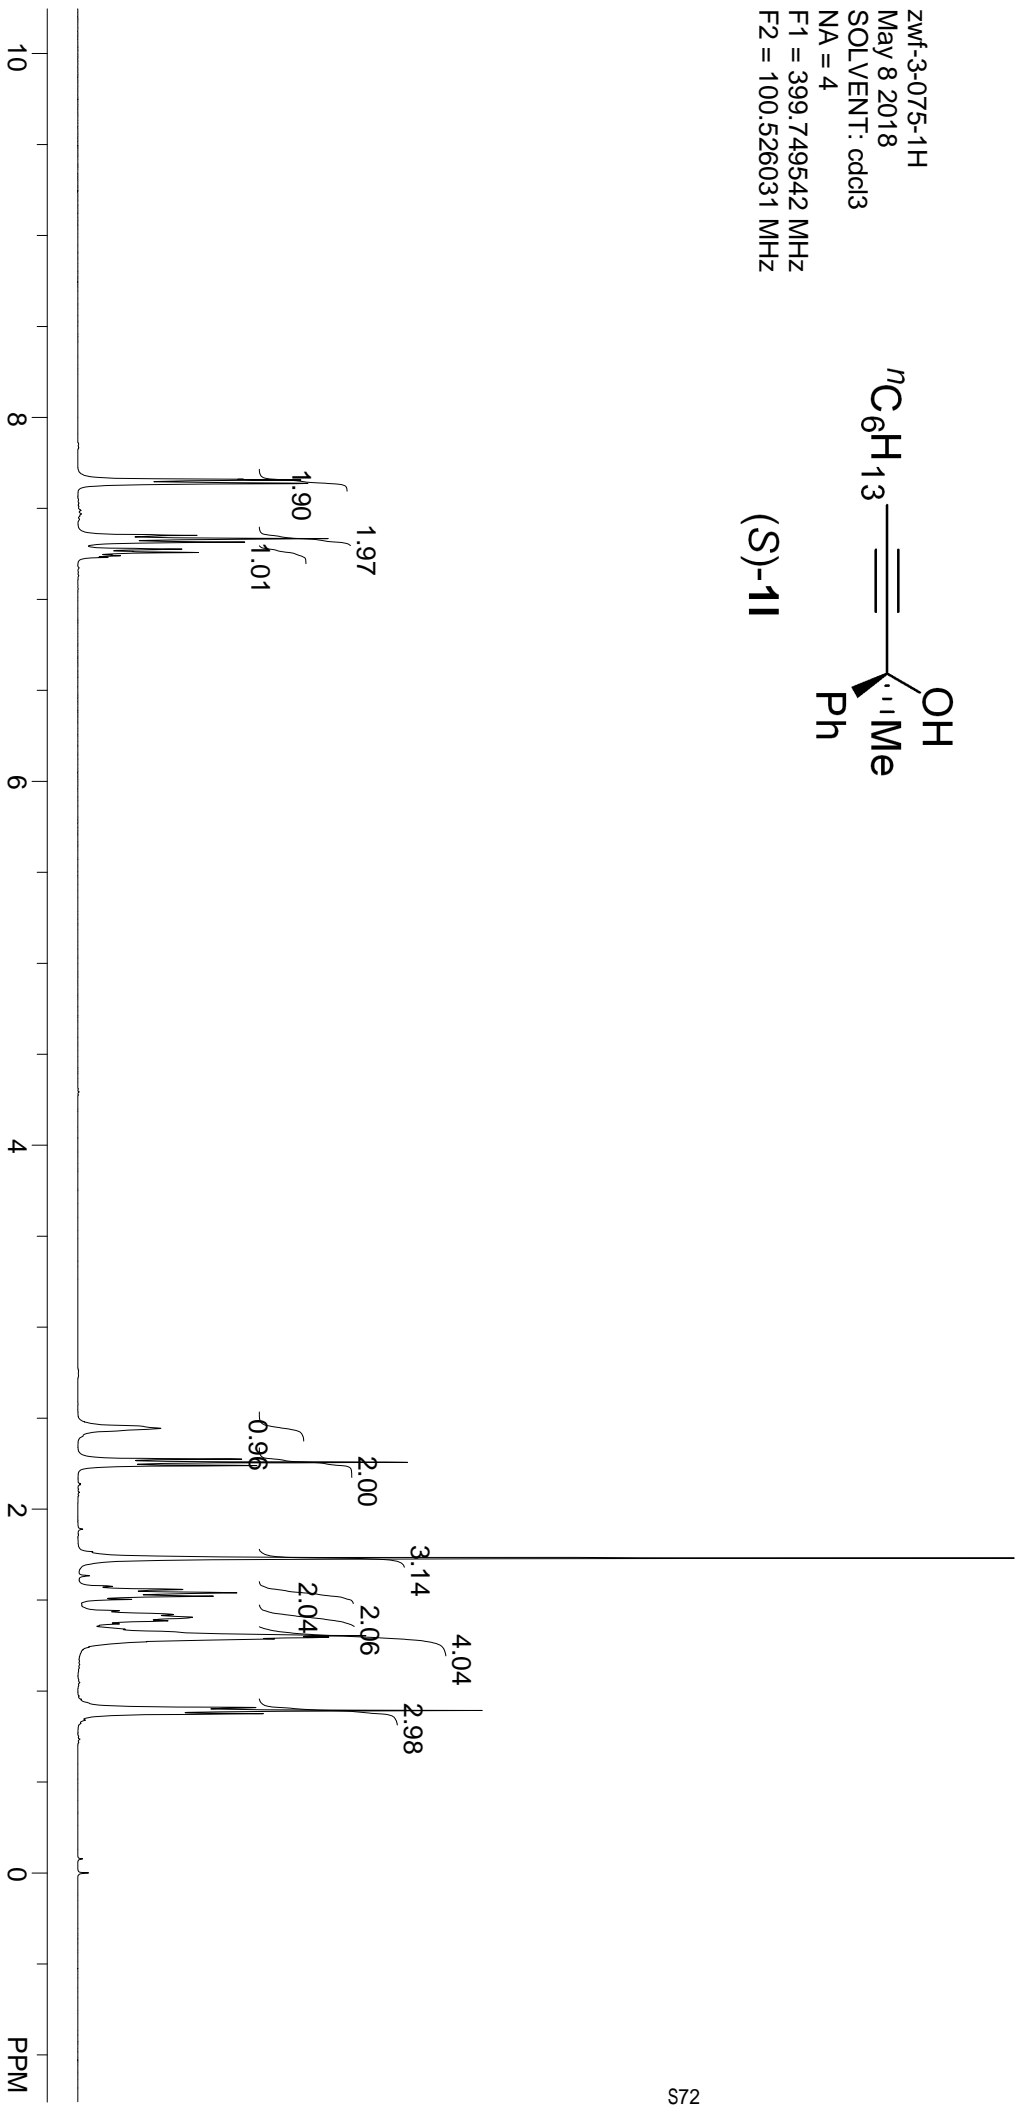



zwtf-3-075-1C  
May 8 2018  
SOLVENT: cdcl3  
NA = 64  
F1 = 100.527557 MHz  
F2 = 399.749146 MHz

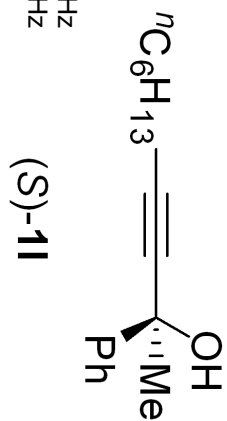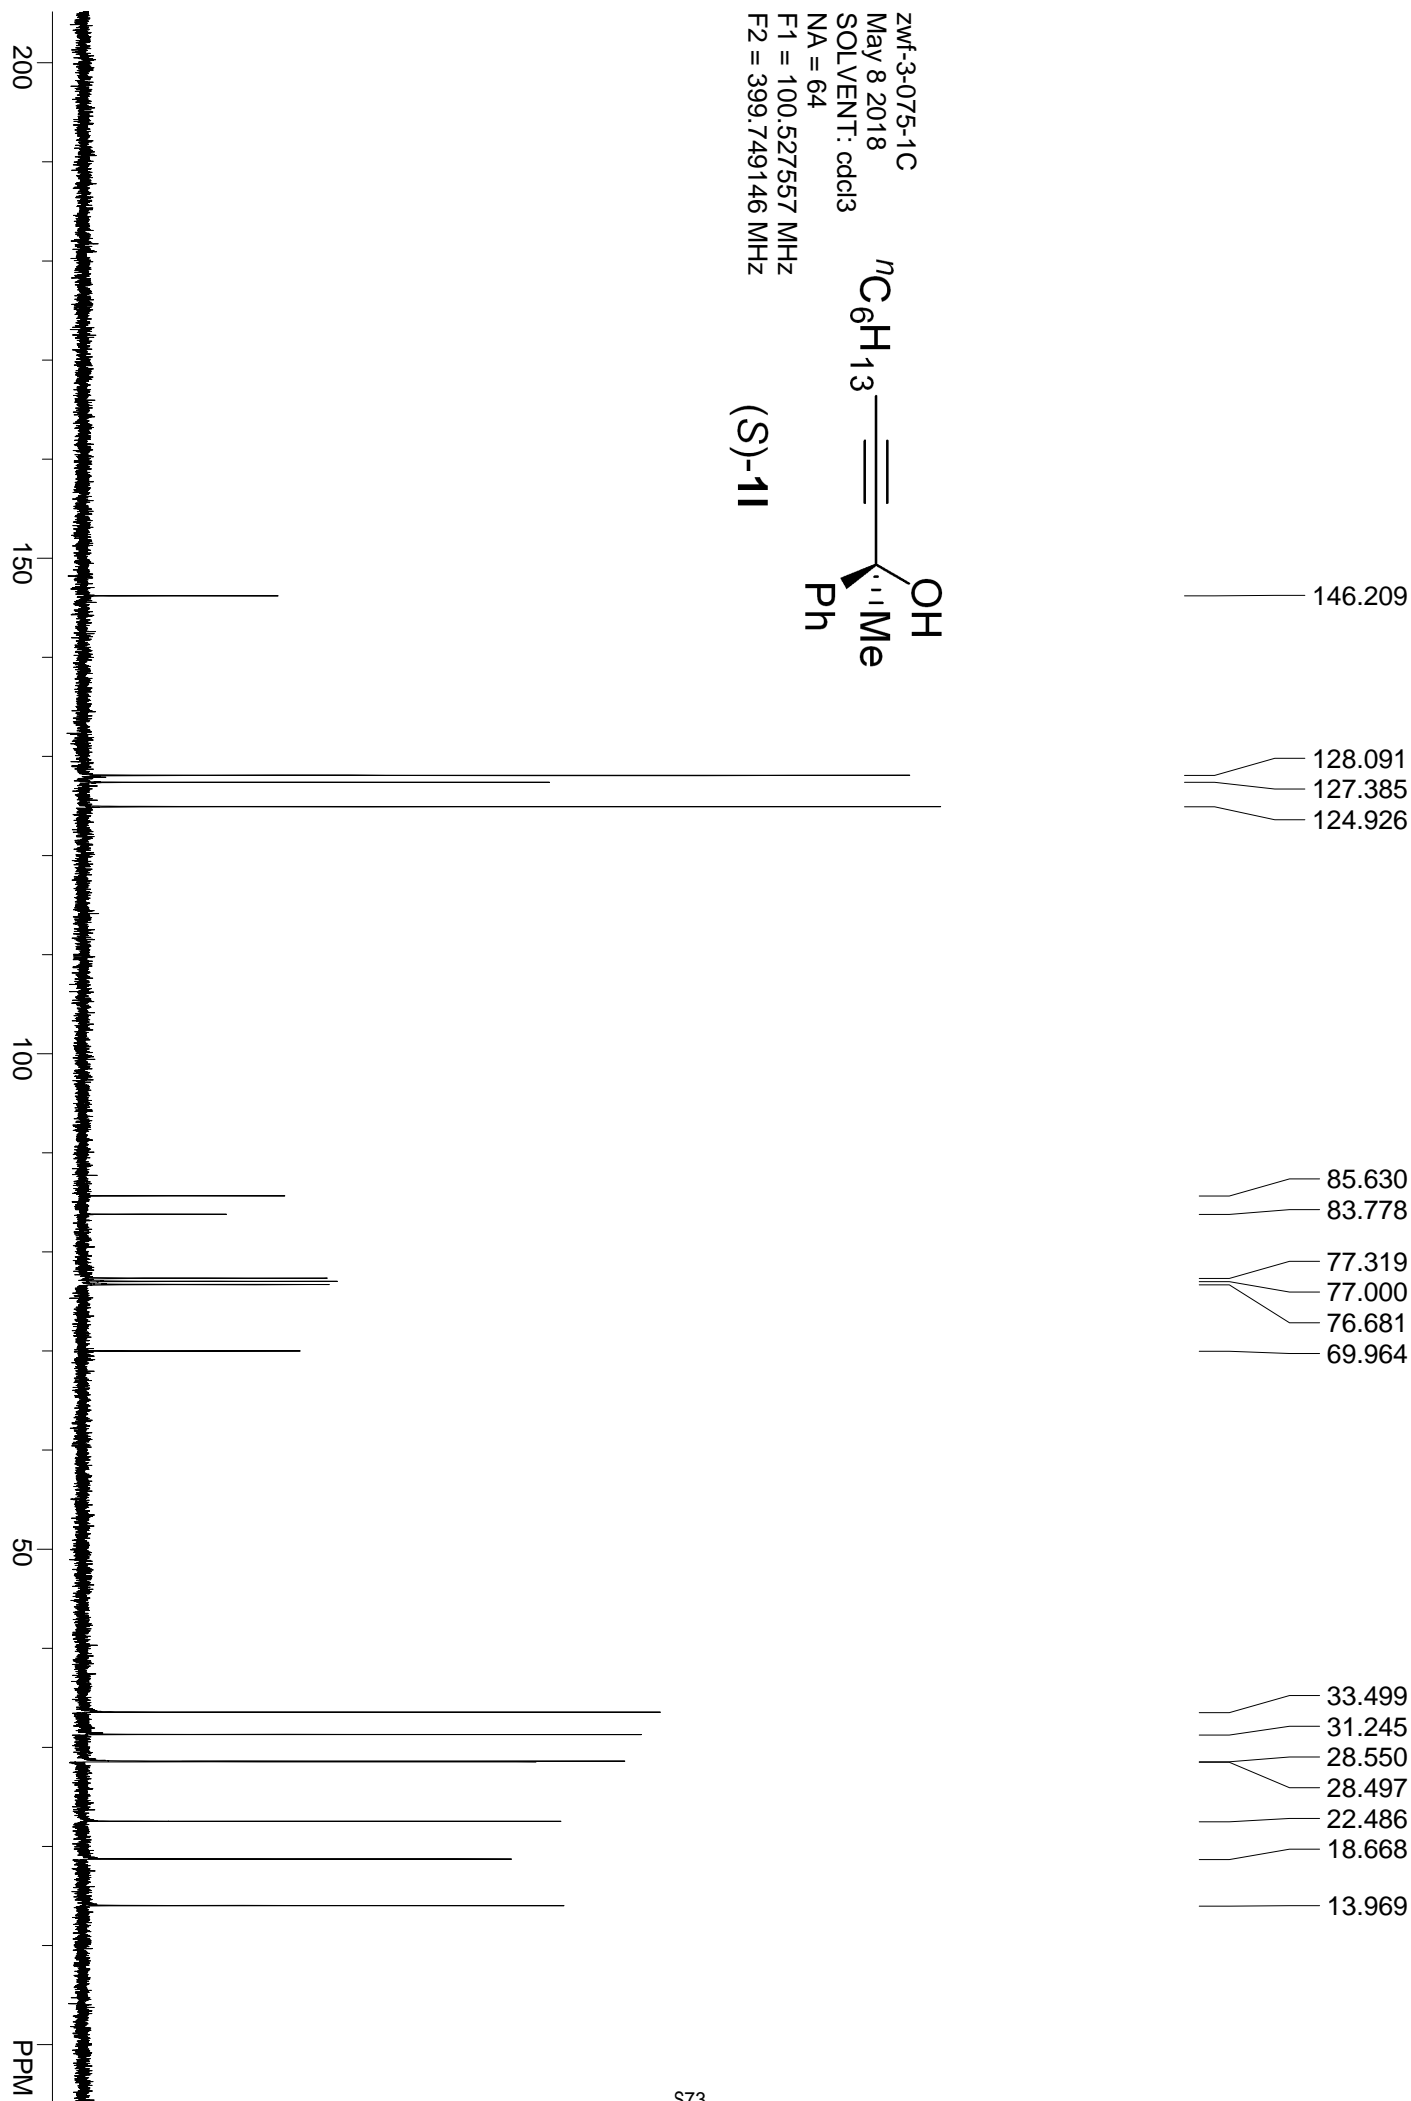

# zwf-3-075-1-AS-H-98-2-1.0-214

实验时间: 2018-05-08, 17:14:32

报告时间: 2018-05-08, 17:27:48

谱图文件: E:\data\zwf\zwf-3-075-1-AS-H-98-2-1.0-214.org

方法文件: E:\data\yaoyuan\0414.mtd

实验内容简介:

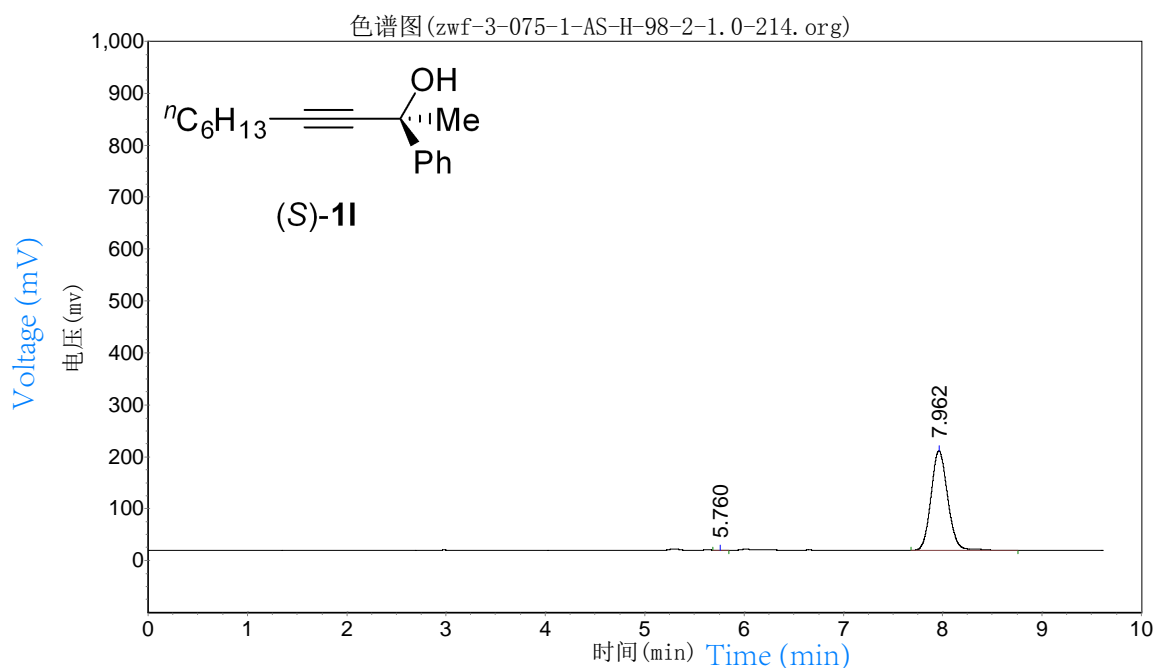

分析结果表

| 峰号 | 峰名 | 保留时间 RT [min] | 峰高 Height  | 峰面积 Area    | 含量 Area % |
|----|----|---------------|------------|-------------|-----------|
| 1  |    | 5.760         | 283.889    | 1292.553    | 0.0575    |
| 2  |    | 7.962         | 191921.219 | 2248376.250 | 99.9425   |
| 总计 |    |               | 192205.108 | 2249668.803 | 100.0000  |

# zwf-3-075-1-rac-AS-H-98-2-1.0-214

实验时间: 2018-05-08, 16:55:49

报告时间: 2018-05-08, 17:17:31

谱图文件: E:\data\zwf\zwf-3-075-1-rac-AS-H-98-2-1.0-214.org

方法文件: E:\data\yaoyuan\0414.mtd

实验内容简介:

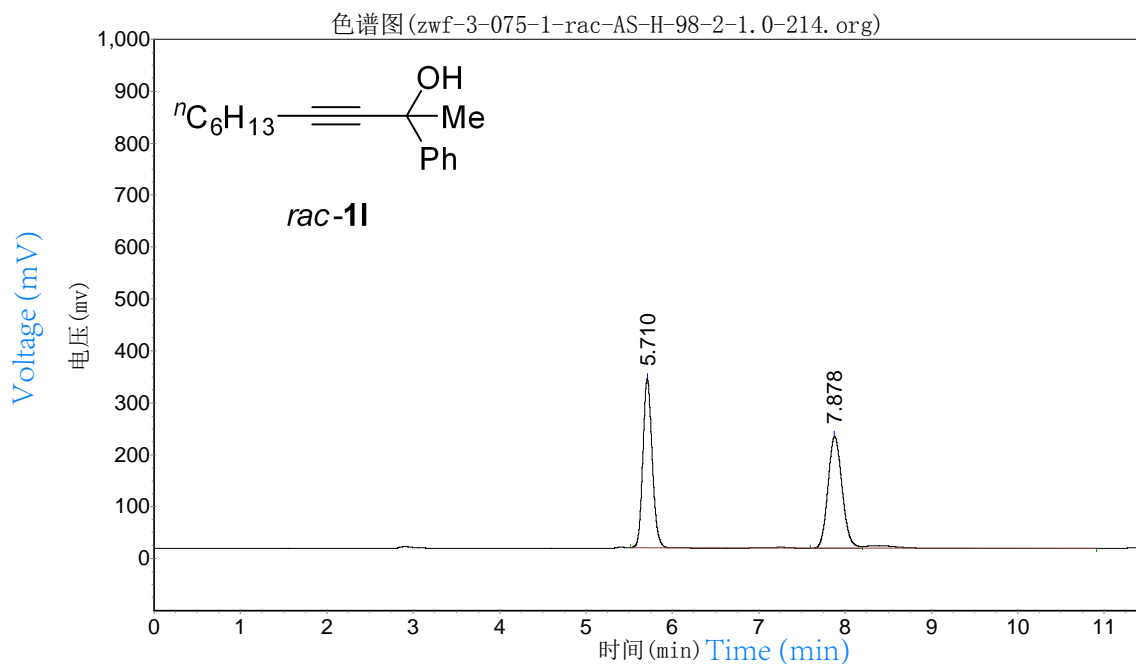

分析结果表

| 峰号 | 峰名 | 保留时间 RT [min] | 峰高 Height  | 峰面积 Area    | 含量 Area % |
|----|----|---------------|------------|-------------|-----------|
| 1  |    | 5.710         | 325666.500 | 2562523.250 | 50.8096   |
| 2  |    | 7.878         | 215890.078 | 2480862.250 | 49.1904   |
| 总计 |    |               | 541556.578 | 5043385.500 | 100.0000  |

ZWF-3-057-1H  
Apr 24 2018  
SOLVENT: cdcl3  
NA = 4  
F1 = 399.749542 MHz  
F2 = 100.526031 MHz

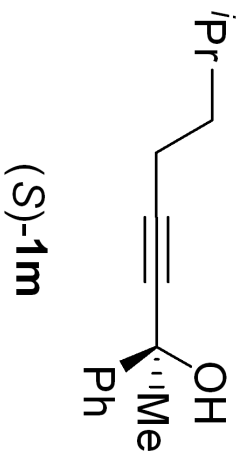

- 7.646
- 7.628
- 7.346
- 7.327
- 7.309
- 7.270
- 7.252
- 7.233

- 2.597
- 2.277
- 2.258
- 2.239
- 1.719
- 1.690
- 1.674
- 1.657
- 1.465
- 1.448
- 1.429
- 1.410
- 0.908
- 0.892
- 0.000

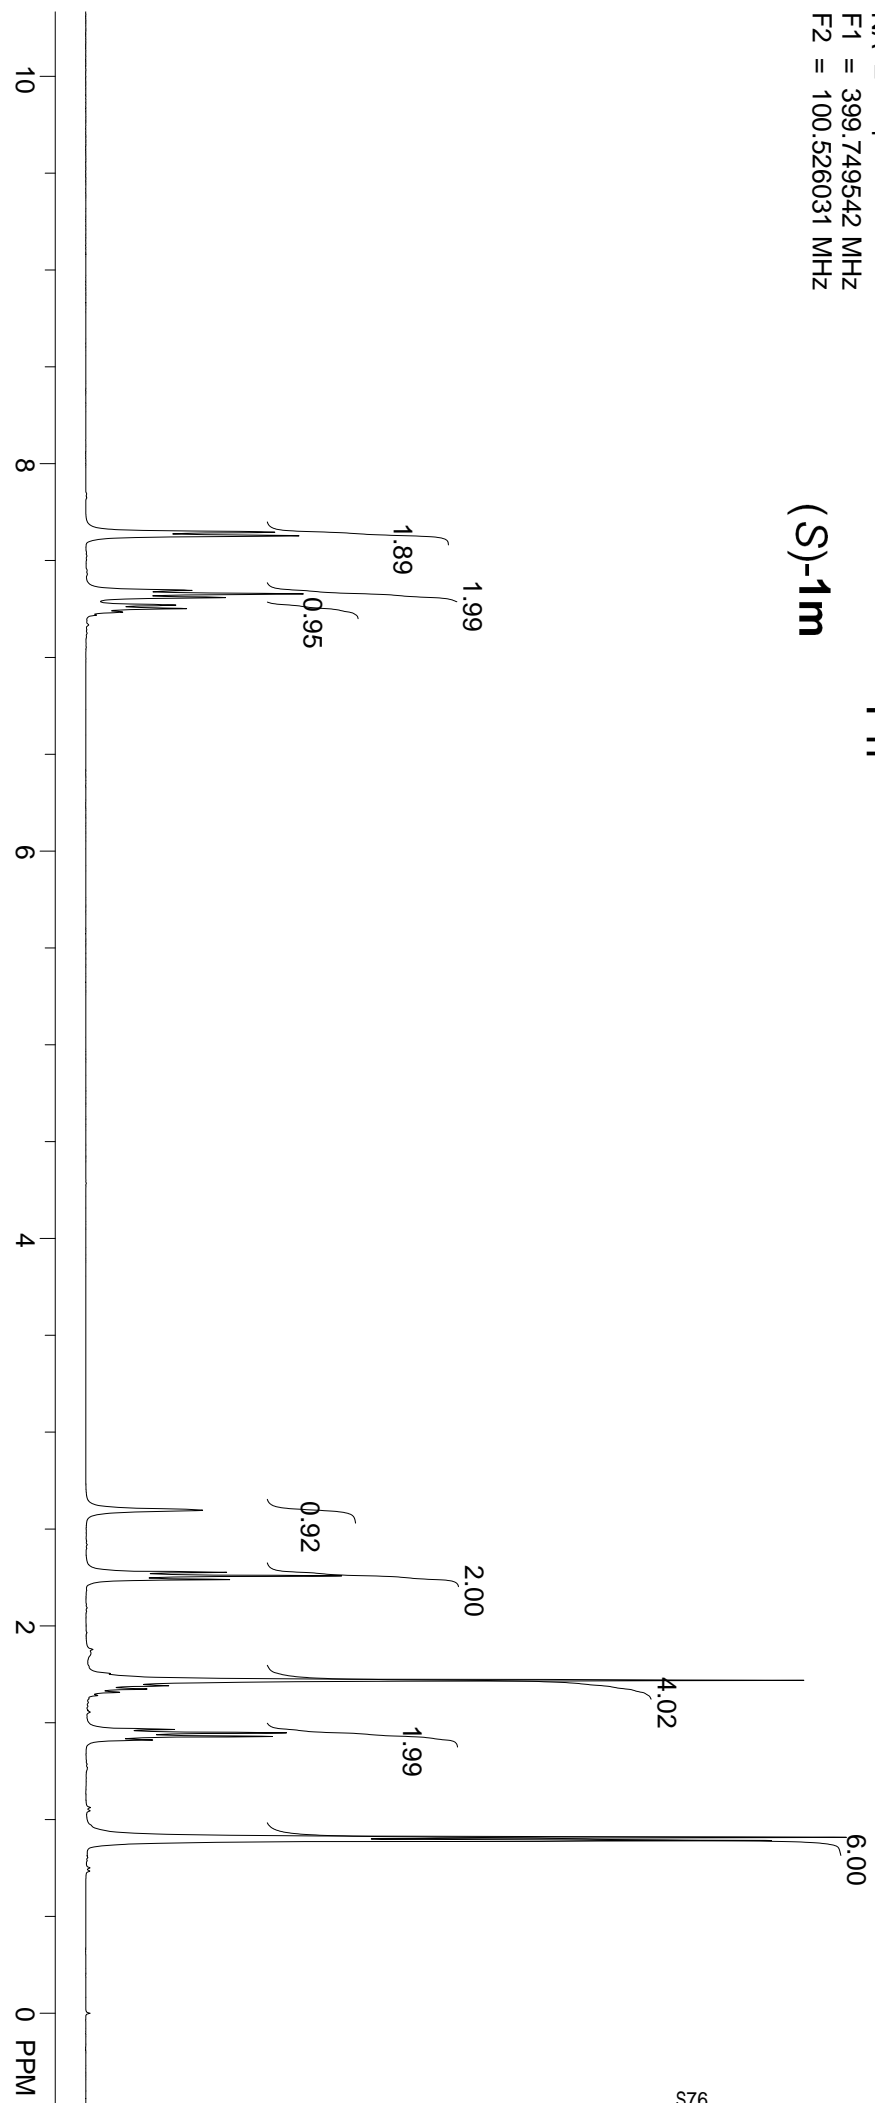

Zwf-3-057-1C  
Apr 24 2018  
SOLVENT: cdcl3  
NA = 64  
F1 = 100.527557 MHz  
F2 = 399.749146 MHz

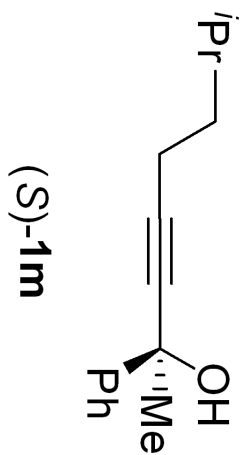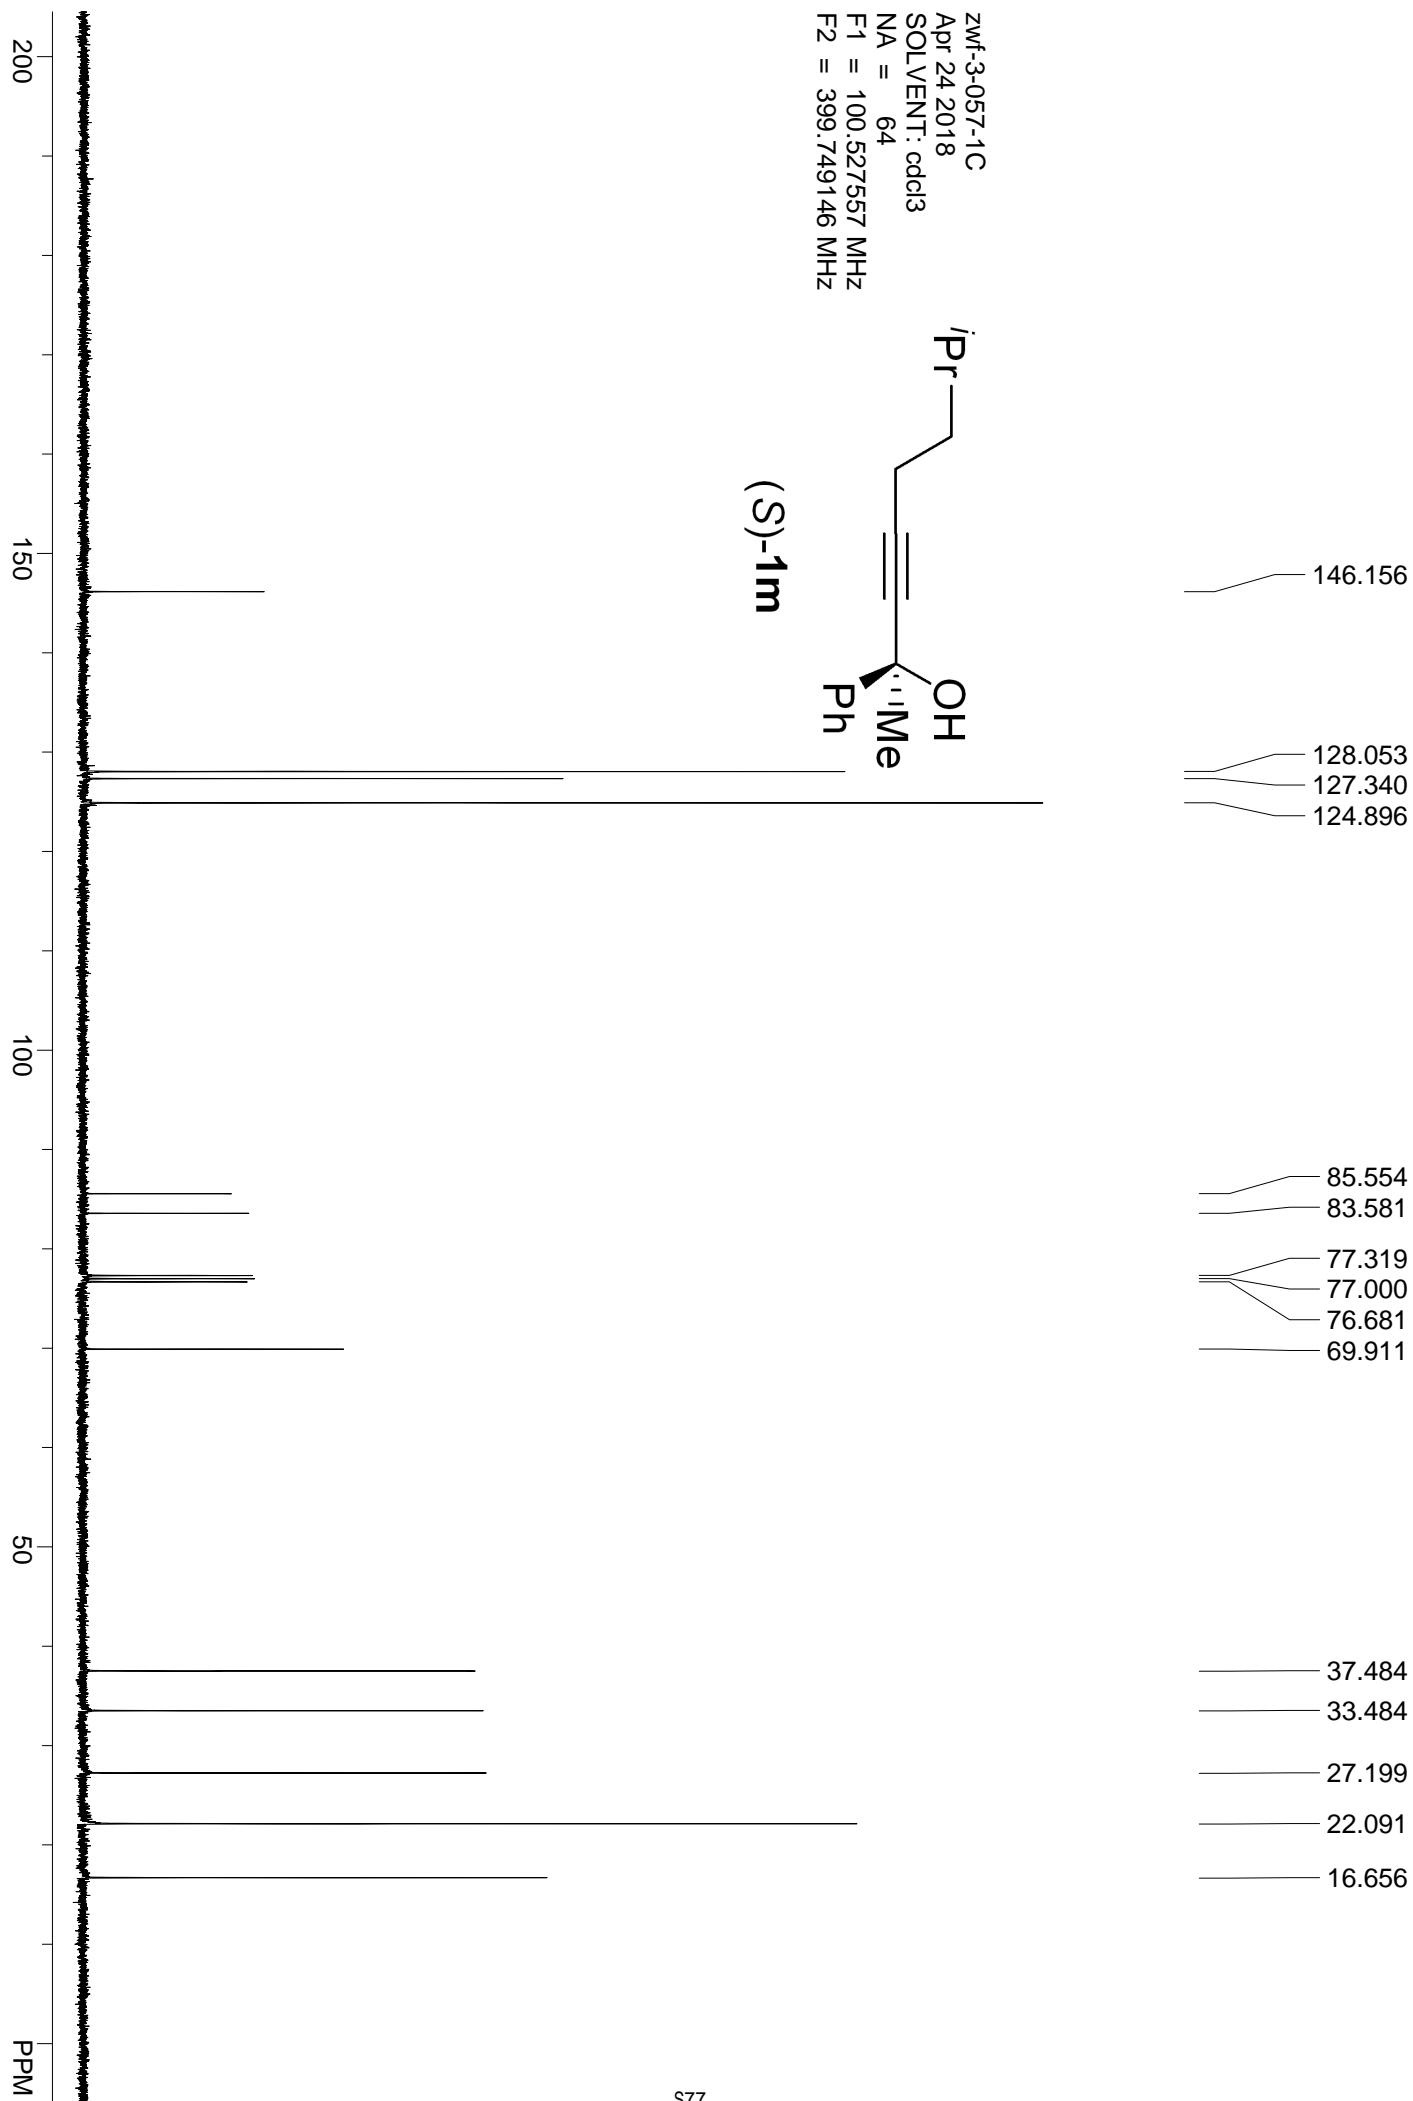

# zwf-3-057-1-AS-H-98-2-1.0-214

实验时间: 2018-04-24, 14:00:11

报告时间: 2018-04-24, 14:15:41

谱图文件: E:\data\zwf\zwf-3-057-1-AS-H-98-2-1.0-214-2.org

方法文件: E:\data\yaoyuan\0414.mtd

实验内容简介:

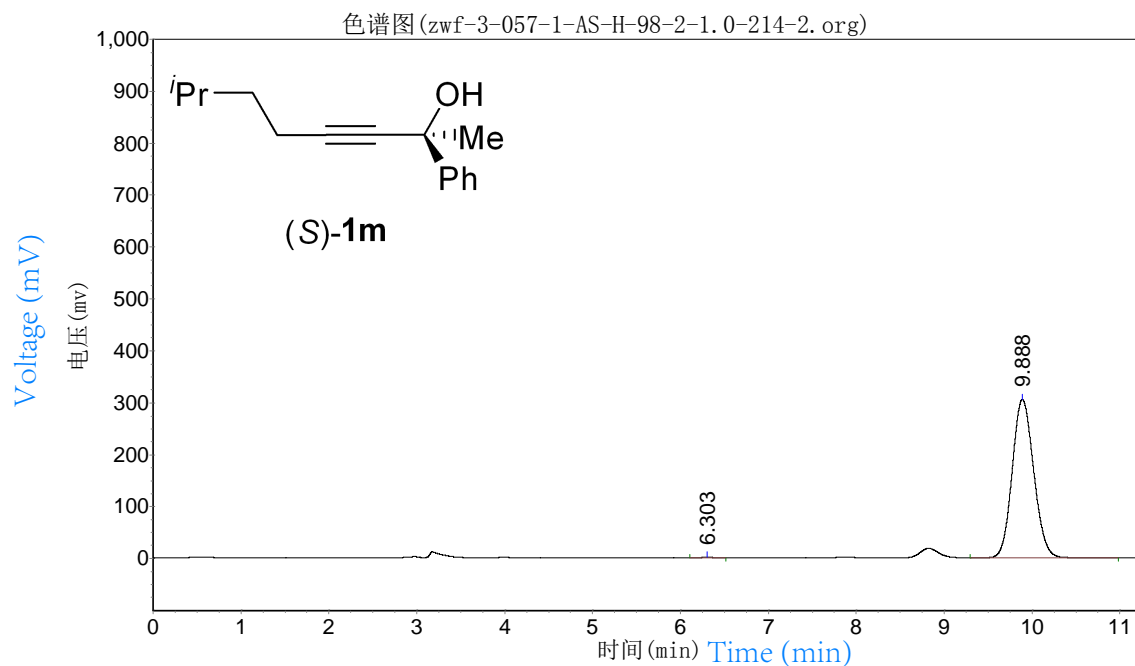

分析结果表

| 峰号 | 峰名 | 保留时间 RT [min] | 峰高 Height  | 峰面积 Area    | 含量 Area % |
|----|----|---------------|------------|-------------|-----------|
| 1  |    | 6.303         | 848.246    | 8848.999    | 0.1705    |
| 2  |    | 9.888         | 304907.313 | 5180251.000 | 99.8295   |
| 总计 |    |               | 305755.558 | 5189099.999 | 100.0000  |

# zwf-3-057-1-rac-AS-H-98-2-1.0-214

实验时间: 2018-04-24, 14:24:57

报告时间: 2018-04-24, 14:39:25

谱图文件: E:\data\zwf\zwf-3-057-1-rac-AS-H-98-2-1.0-214-2.org

方法文件: E:\data\yaoyuan\0414.mtd

实验内容简介:

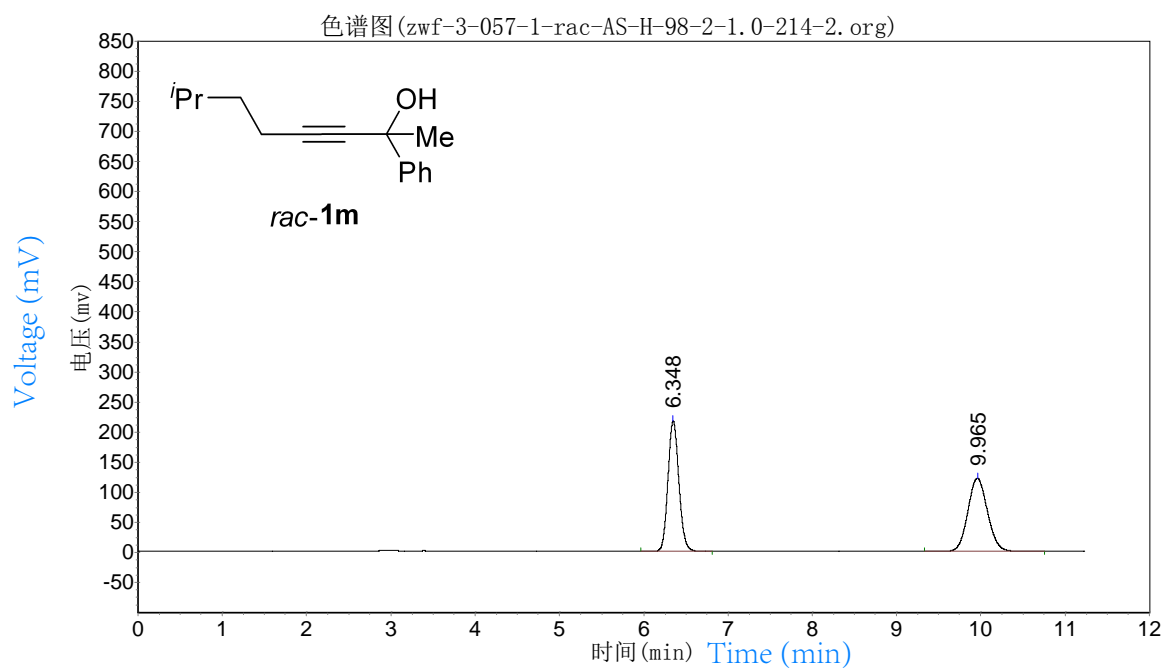

分析结果表

| 峰号 | 峰名 | 保留时间 RT [min] | 峰高 Height  | 峰面积 Area    | 含量 Area % |
|----|----|---------------|------------|-------------|-----------|
| 1  |    | 6.348         | 216354.641 | 1939244.500 | 49.8360   |
| 2  |    | 9.965         | 121371.891 | 1952005.750 | 50.1640   |
| 总计 |    |               | 337726.531 | 3891250.250 | 100.0000  |

zwf-3-070-1H  
Apr 28 2018  
SOLVENT: CDCl3  
NA = 4  
F1 = 400.132477 MHz  
F2 = 1.000000 MHz

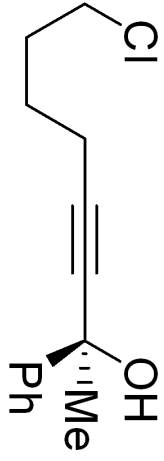

- 7.653
- 7.650
- 7.631
- 7.373
- 7.355
- 7.336
- 7.298
- 7.285
- 7.280
- 7.262
- 7.251

- 3.586
- 3.570
- 3.553

- 2.355
- 2.347
- 2.330
- 2.313
- 1.943
- 1.926
- 1.919
- 1.909
- 1.889
- 1.873
- 1.743
- 1.731
- 1.711
- 1.693
- 1.676
- 1.621
- 0.000

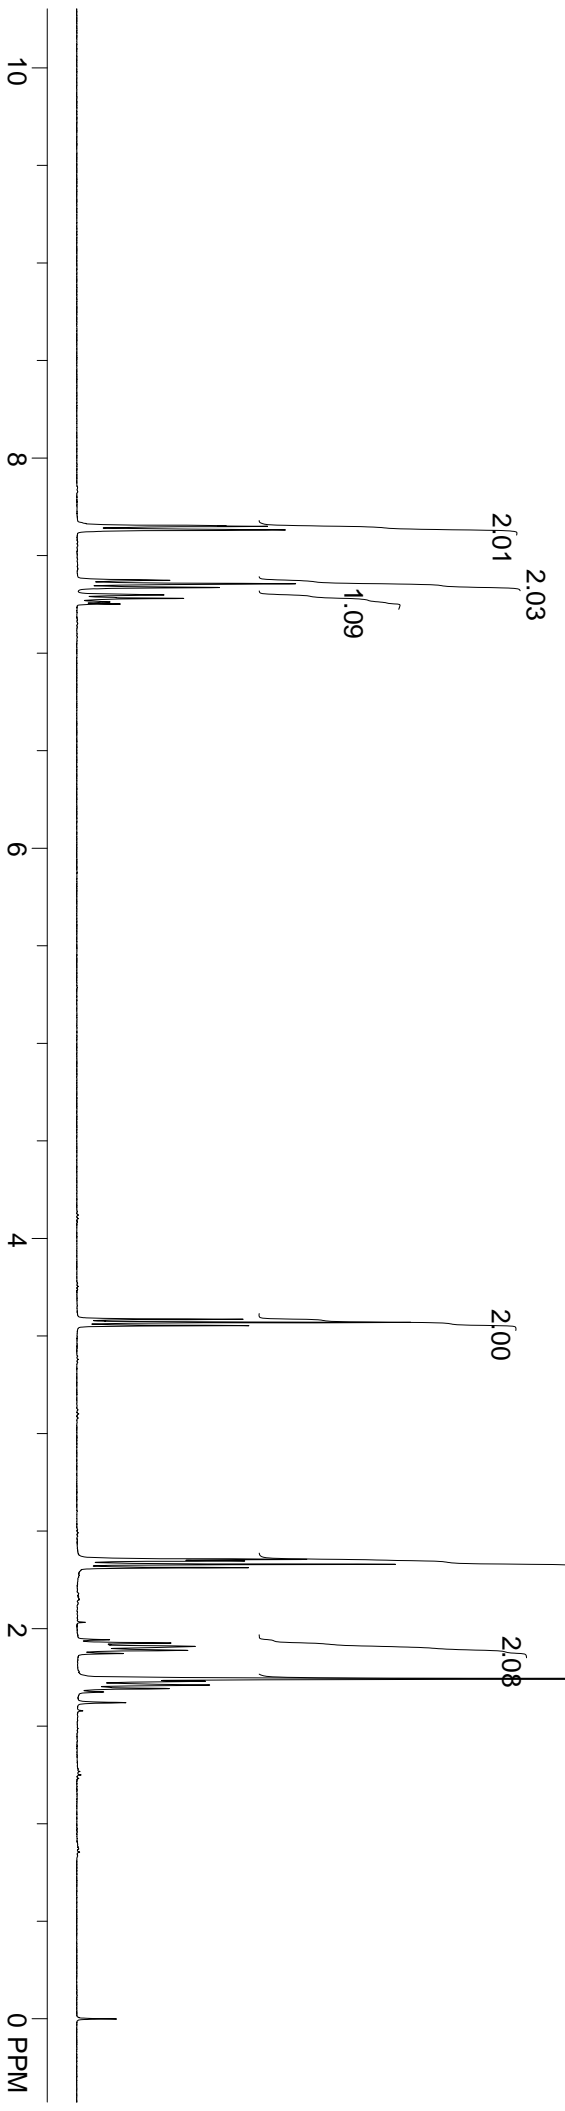



ZWF-3-070-1C  
Apr 28 2018  
SOLVENT: cdcl3  
NA = 64  
F1 = 100.527557 MHz  
F2 = 399.749146 MHz

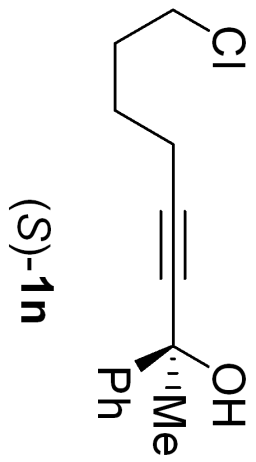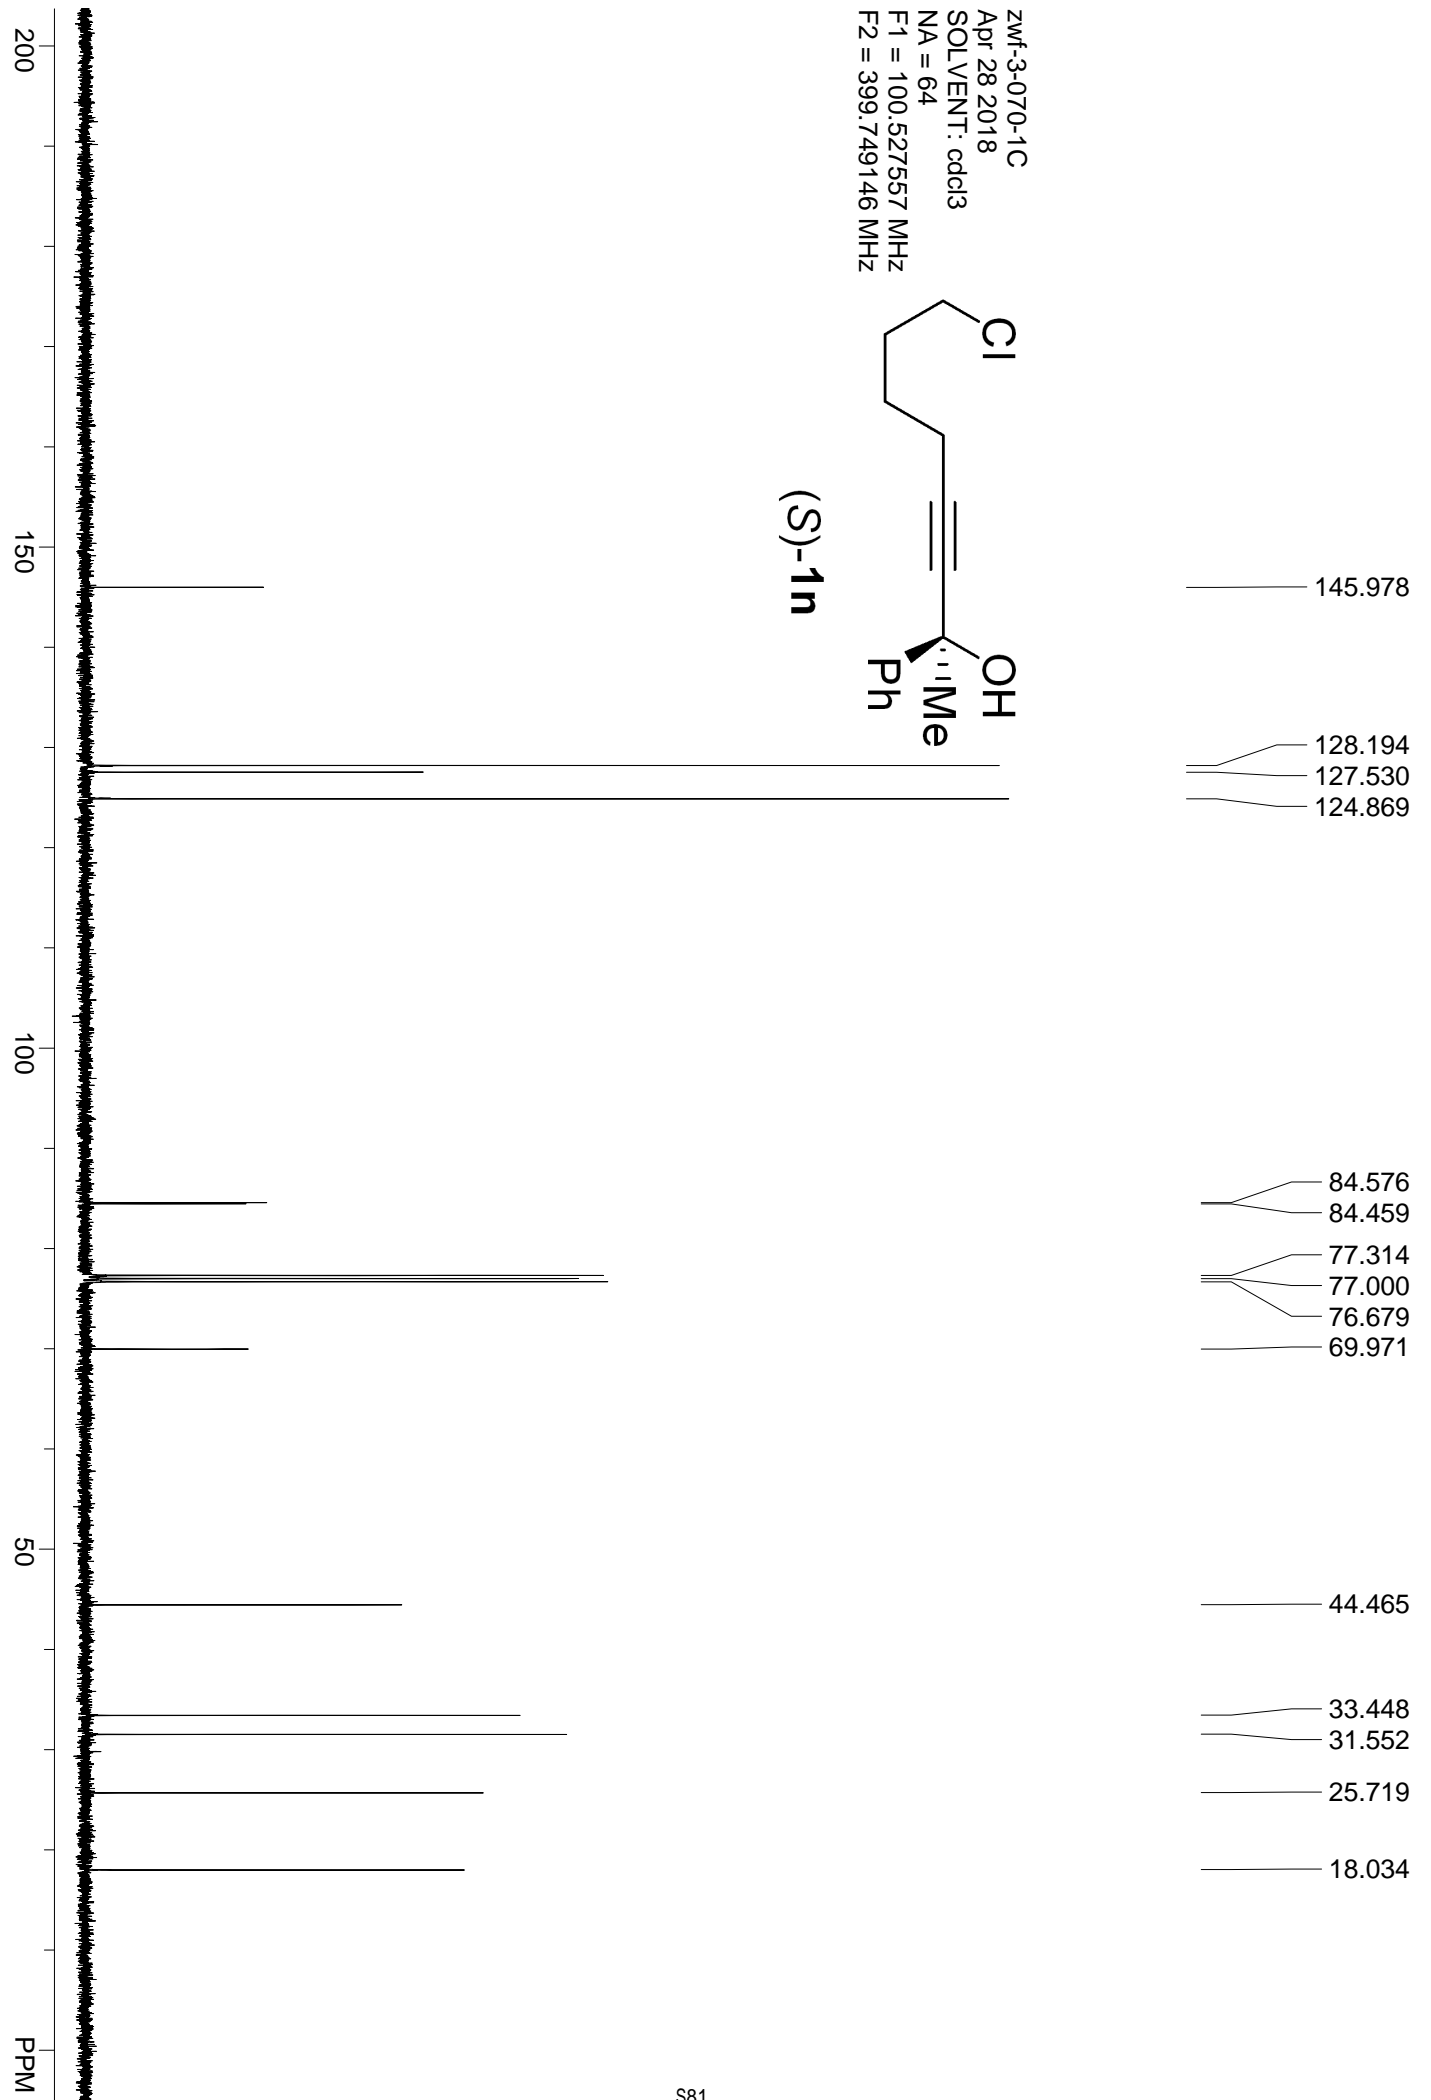

# zwf-3-070-1-AS-H-95-5-1.3-214

实验时间: 2018-04-28, 10:32:56  
谱图文件: E:\data\zwf\zwf-3-070-1-AS-H-95-5-1.3-214.org  
方法文件: E:\data\yaoyuan\0414.mtd

报告时间: 2018-04-28, 10:49:35

实验内容简介:

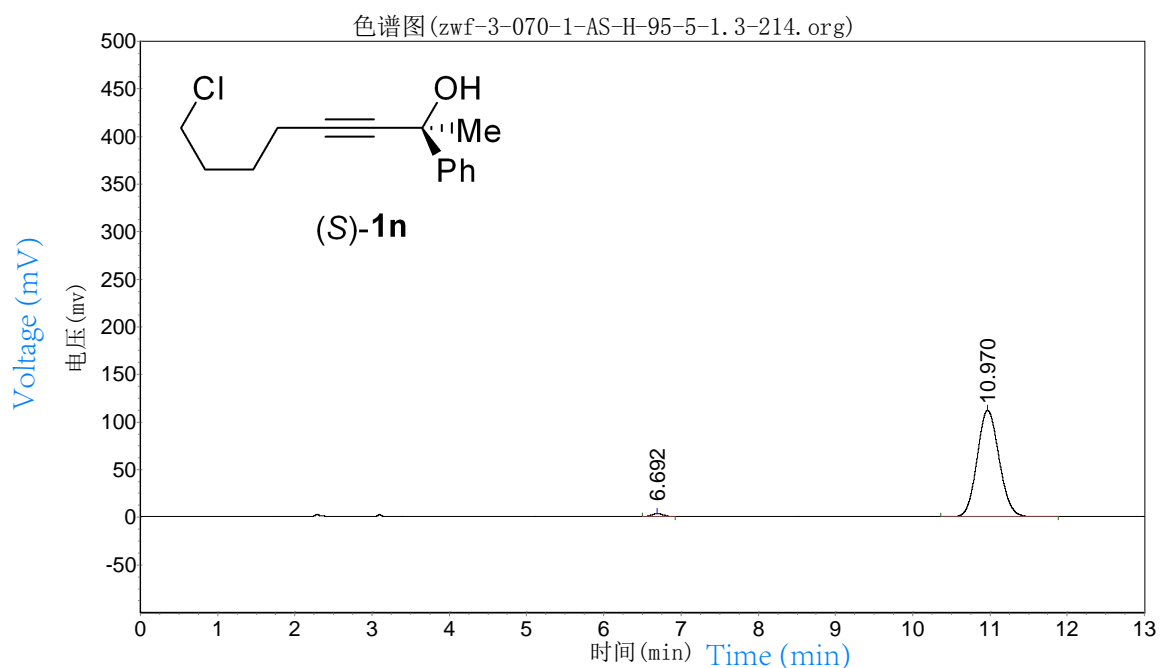

分析结果表

| 峰号 | 峰名 | 保留时间 RT [min] | 峰高 Height  | 峰面积 Area    | 含量 Area % |
|----|----|---------------|------------|-------------|-----------|
| 1  |    | 6.692         | 2978.383   | 30816.500   | 1.3805    |
| 2  |    | 10.970        | 111792.617 | 2201448.000 | 98.6195   |
| 总计 |    |               | 114771.000 | 2232264.500 | 100.0000  |

# zwf-3-070-1-rac-AS-H-95-5-1.3-214

实验时间: 2018-04-28, 10:19:08

报告时间: 2018-04-28, 10:35:13

谱图文件: E:\data\zwf\zwf-3-070-1-rac-AS-H-95-5-1.3-214.org

方法文件: E:\data\yaoyuan\0414.mtd

实验内容简介:

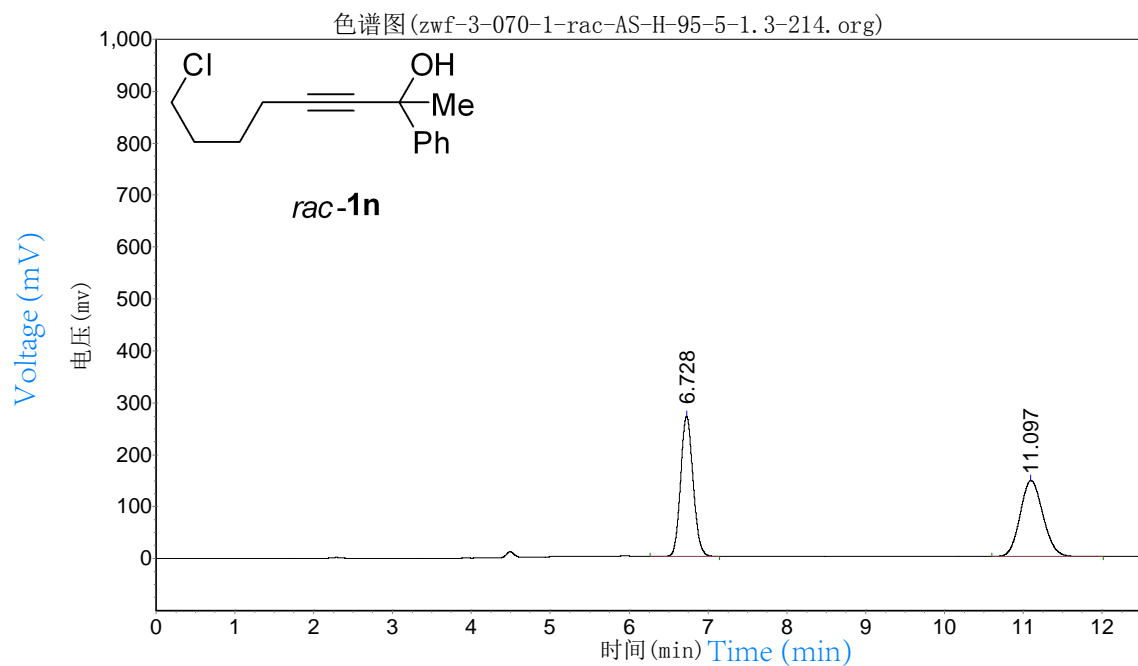

分析结果表

| 峰号 | 峰名 | 保留时间 RT [min] | 峰高 Height  | 峰面积 Area    | 含量 Area % |
|----|----|---------------|------------|-------------|-----------|
| 1  |    | 6.728         | 269807.063 | 2967686.750 | 50.2455   |
| 2  |    | 11.097        | 146205.141 | 2938686.250 | 49.7545   |
| 总计 |    |               | 416012.203 | 5906373.000 | 100.0000  |

zwf-3-050-1H  
Apr 18 2018  
SOLVENT: cdcl3  
NA = 4  
F1 = 399.749542 MHz  
F2 = 100.526031 MHz

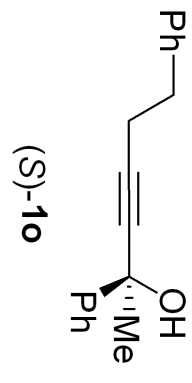

- 7.545
- 7.526
- 7.303
- 7.285
- 7.266
- 7.261
- 7.242
- 7.228
- 7.200
- 7.185

- 2.840
- 2.821
- 2.802
- 2.554
- 2.535
- 2.517
- 2.492

1.685

0.000

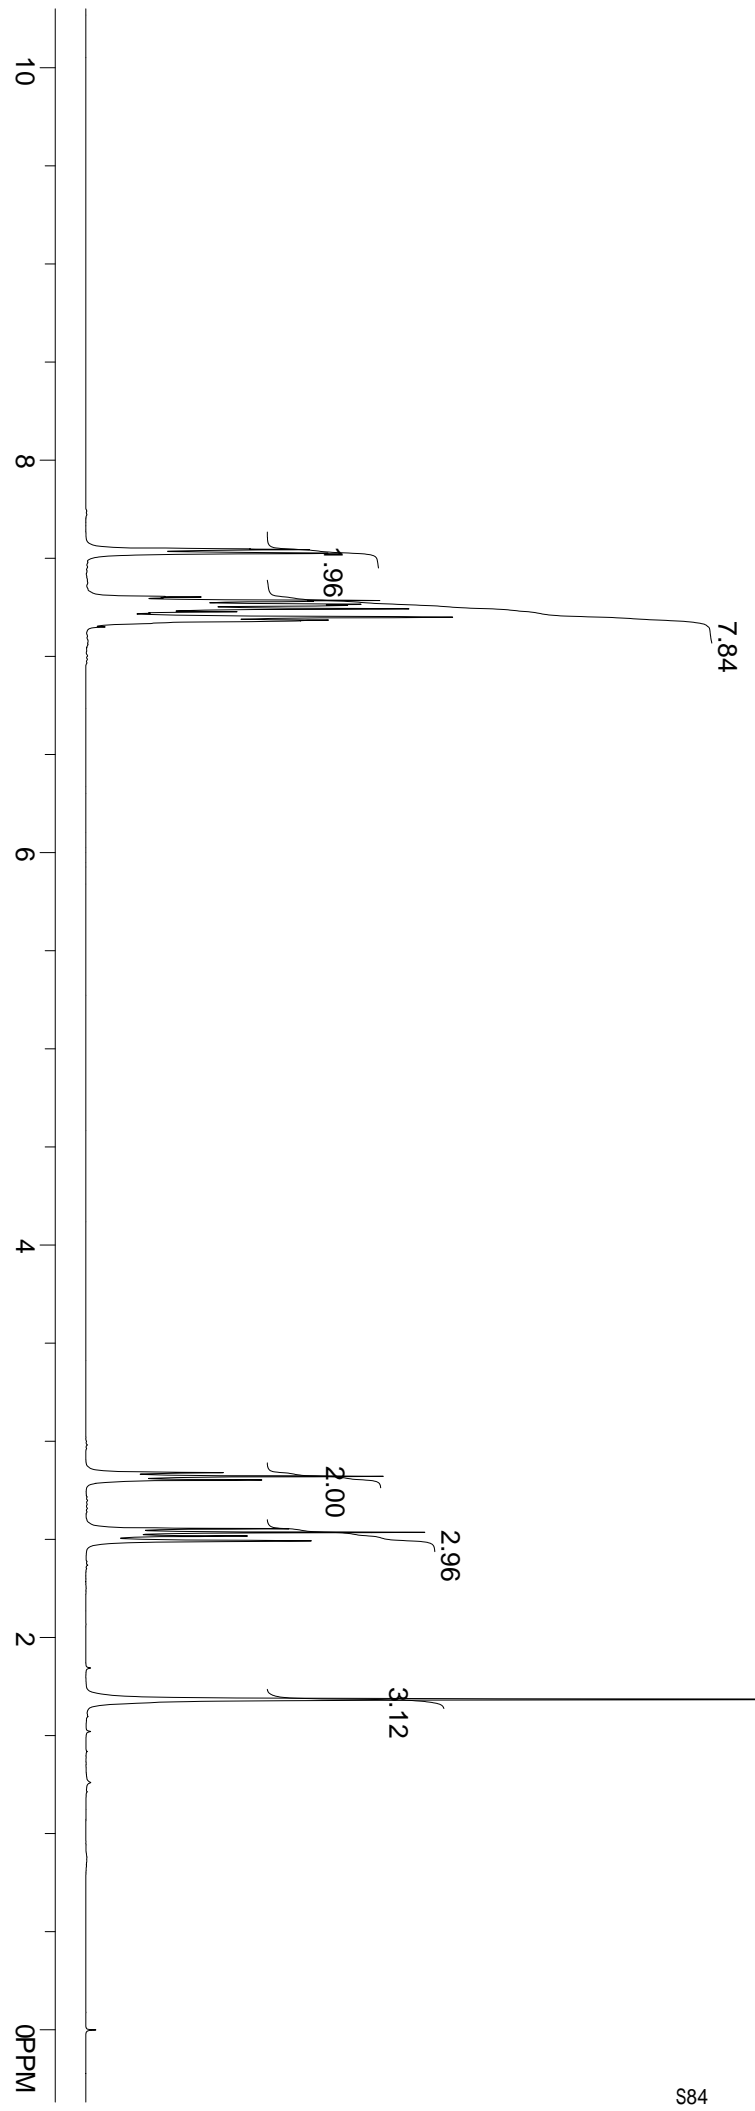

zwf-3-050-1C  
Apr 18 2018  
SOLVENT: cdcl3  
NA = 64  
F1 = 100.527557 MHz  
F2 = 399.749146 MHz

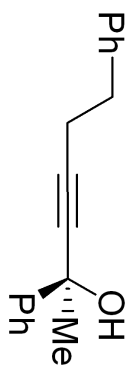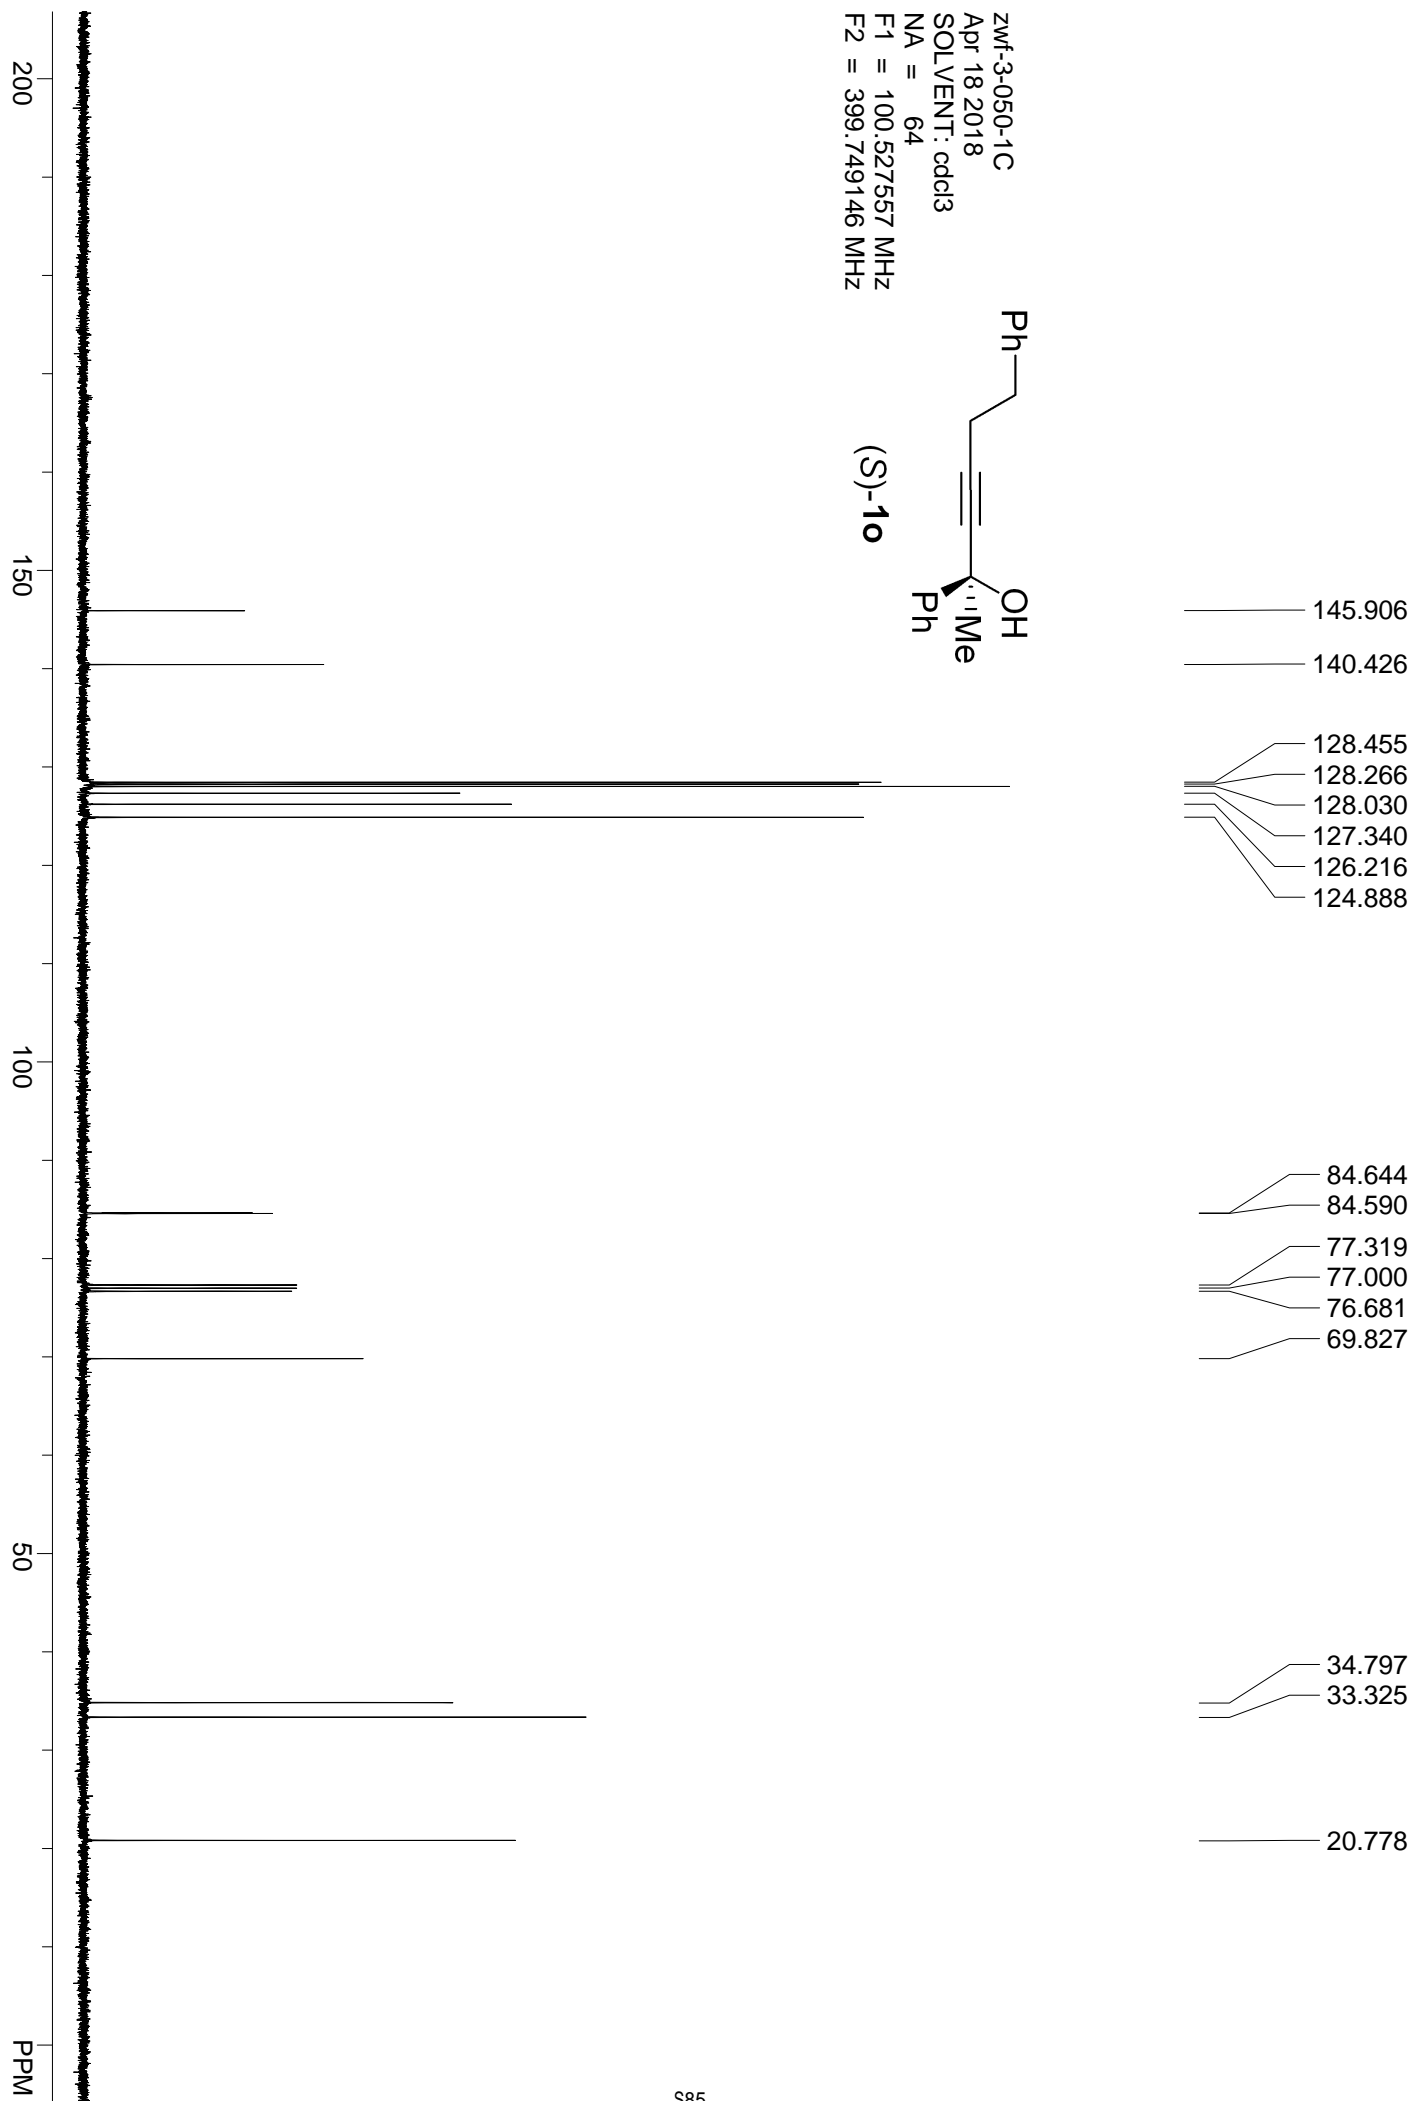

# zwf-3-050-1-AS-H-98-2-1.0-214

实验时间: 2018-04-18, 21:39:45  
谱图文件: E:\data\zwf\zwf-3-050-1a.org  
方法文件: E:\data\yaoyuan\0414.mtd

报告时间: 2018-04-18, 22:03:51

实验内容简介:

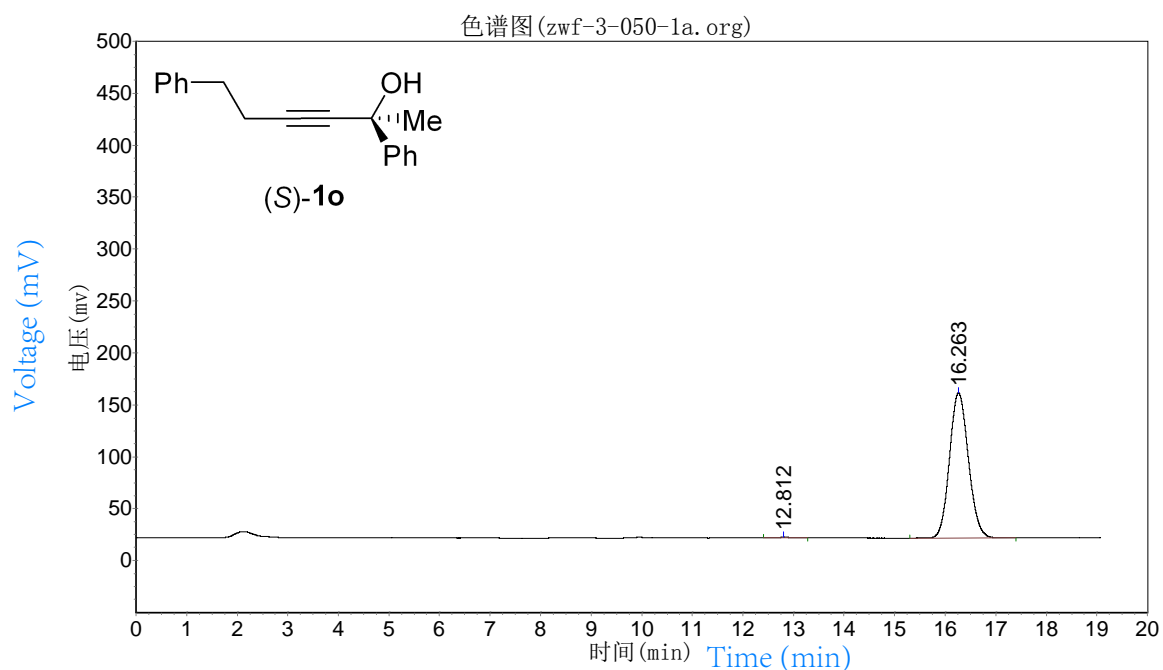

分析结果表

| 峰号 | 峰名 | 保留时间 RT [min] | 峰高 Height  | 峰面积 Area    | 含量 Area % |
|----|----|---------------|------------|-------------|-----------|
| 1  |    | 12.812        | 729.064    | 14020.701   | 0.3850    |
| 2  |    | 16.263        | 139980.406 | 3627492.750 | 99.6150   |
| 总计 |    |               | 140709.470 | 3641513.451 | 100.0000  |

## zwf-3-050-1-rac-AS-H-98-2-1.0-214

实验时间: 2018-04-14, 11:10:48  
谱图文件: E:\data\zwf\other\Yy-2-153-1-rac.org  
方法文件: E:\data\yaoyuan\0414.mtd

实验者:  
报告时间: 2018-04-18, 22:22:34  
积分方法: 面积归一法

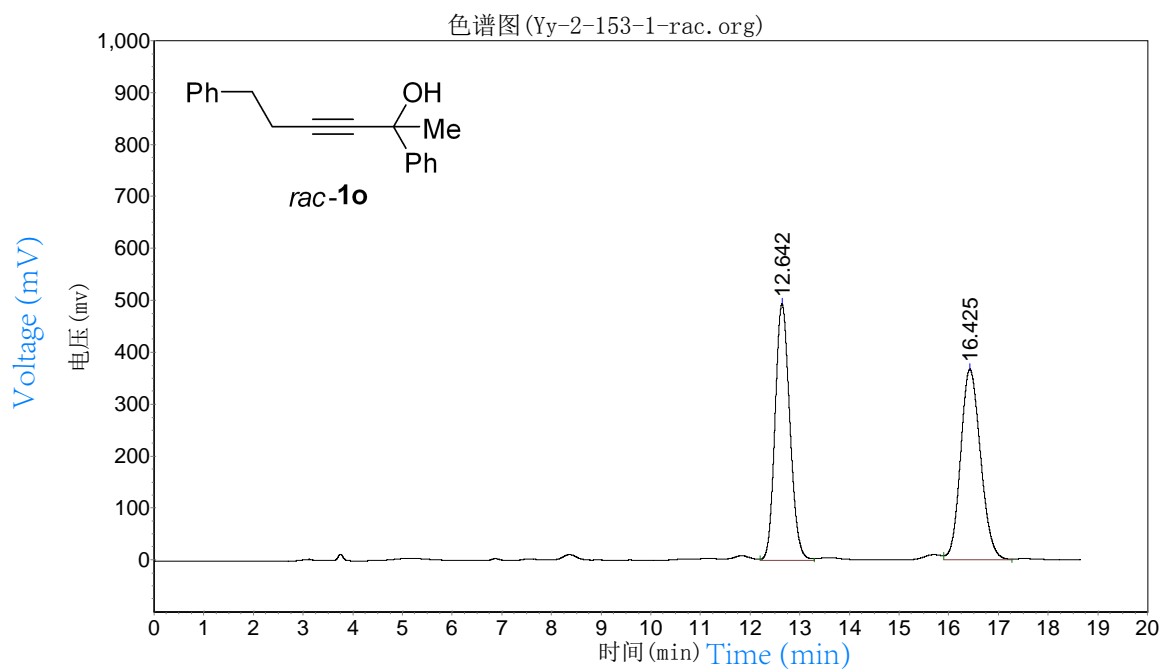

分析结果表

| 峰号 | 峰名 | 保留时间 RT [min] | 峰高 Height  | 峰面积 Area     | 含量 Area % |
|----|----|---------------|------------|--------------|-----------|
| 1  |    | 12.642        | 494191.656 | 10208660.000 | 49.7952   |
| 2  |    | 16.425        | 367504.719 | 10292623.000 | 50.2048   |
| 总计 |    |               | 861696.375 | 20501283.000 | 100.0000  |

zwf-3-043-1H  
Apr 16 2018  
SOLVENT: cdcl3  
NA = 8  
F1 = 399.749542 MHz  
F2 = 100.526031 MHz

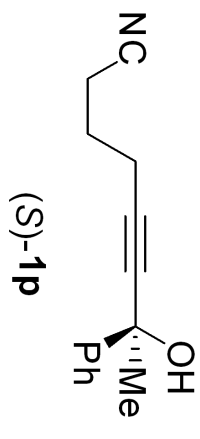

- 7.622
- 7.602
- 7.371
- 7.353
- 7.333
- 7.297
- 7.279
- 7.261
- 7.254

- 2.662
- 2.485
- 2.468
- 2.451
- 2.434
- 1.910
- 1.893
- 1.875
- 1.858
- 1.840
- 1.740

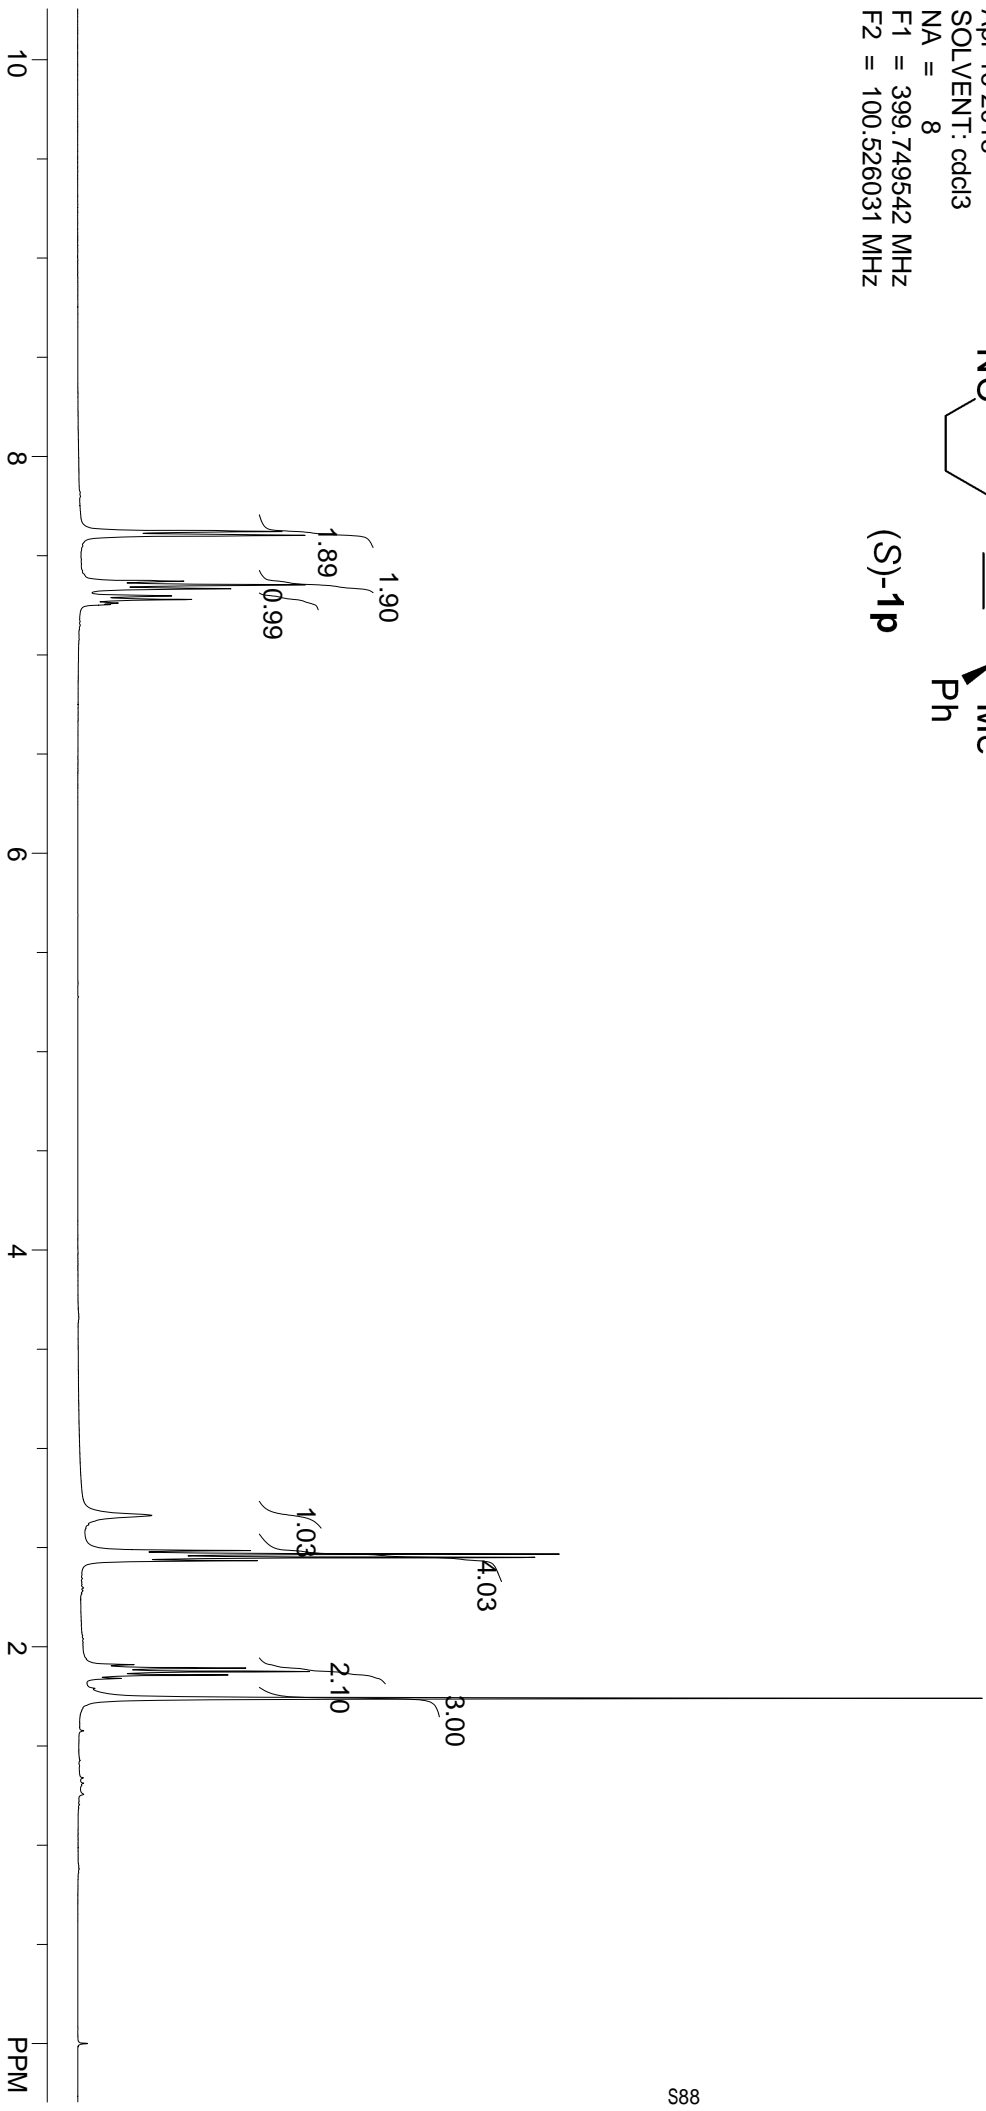



zwf-3-043-1C  
Apr 16 2018  
SOLVENT: cdcl3  
NA = 512  
F1 = 100.527557 MHz  
F2 = 399.749146 MHz

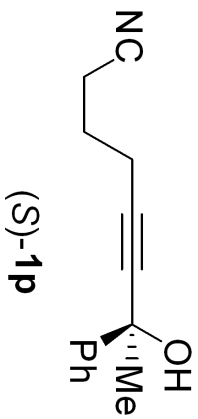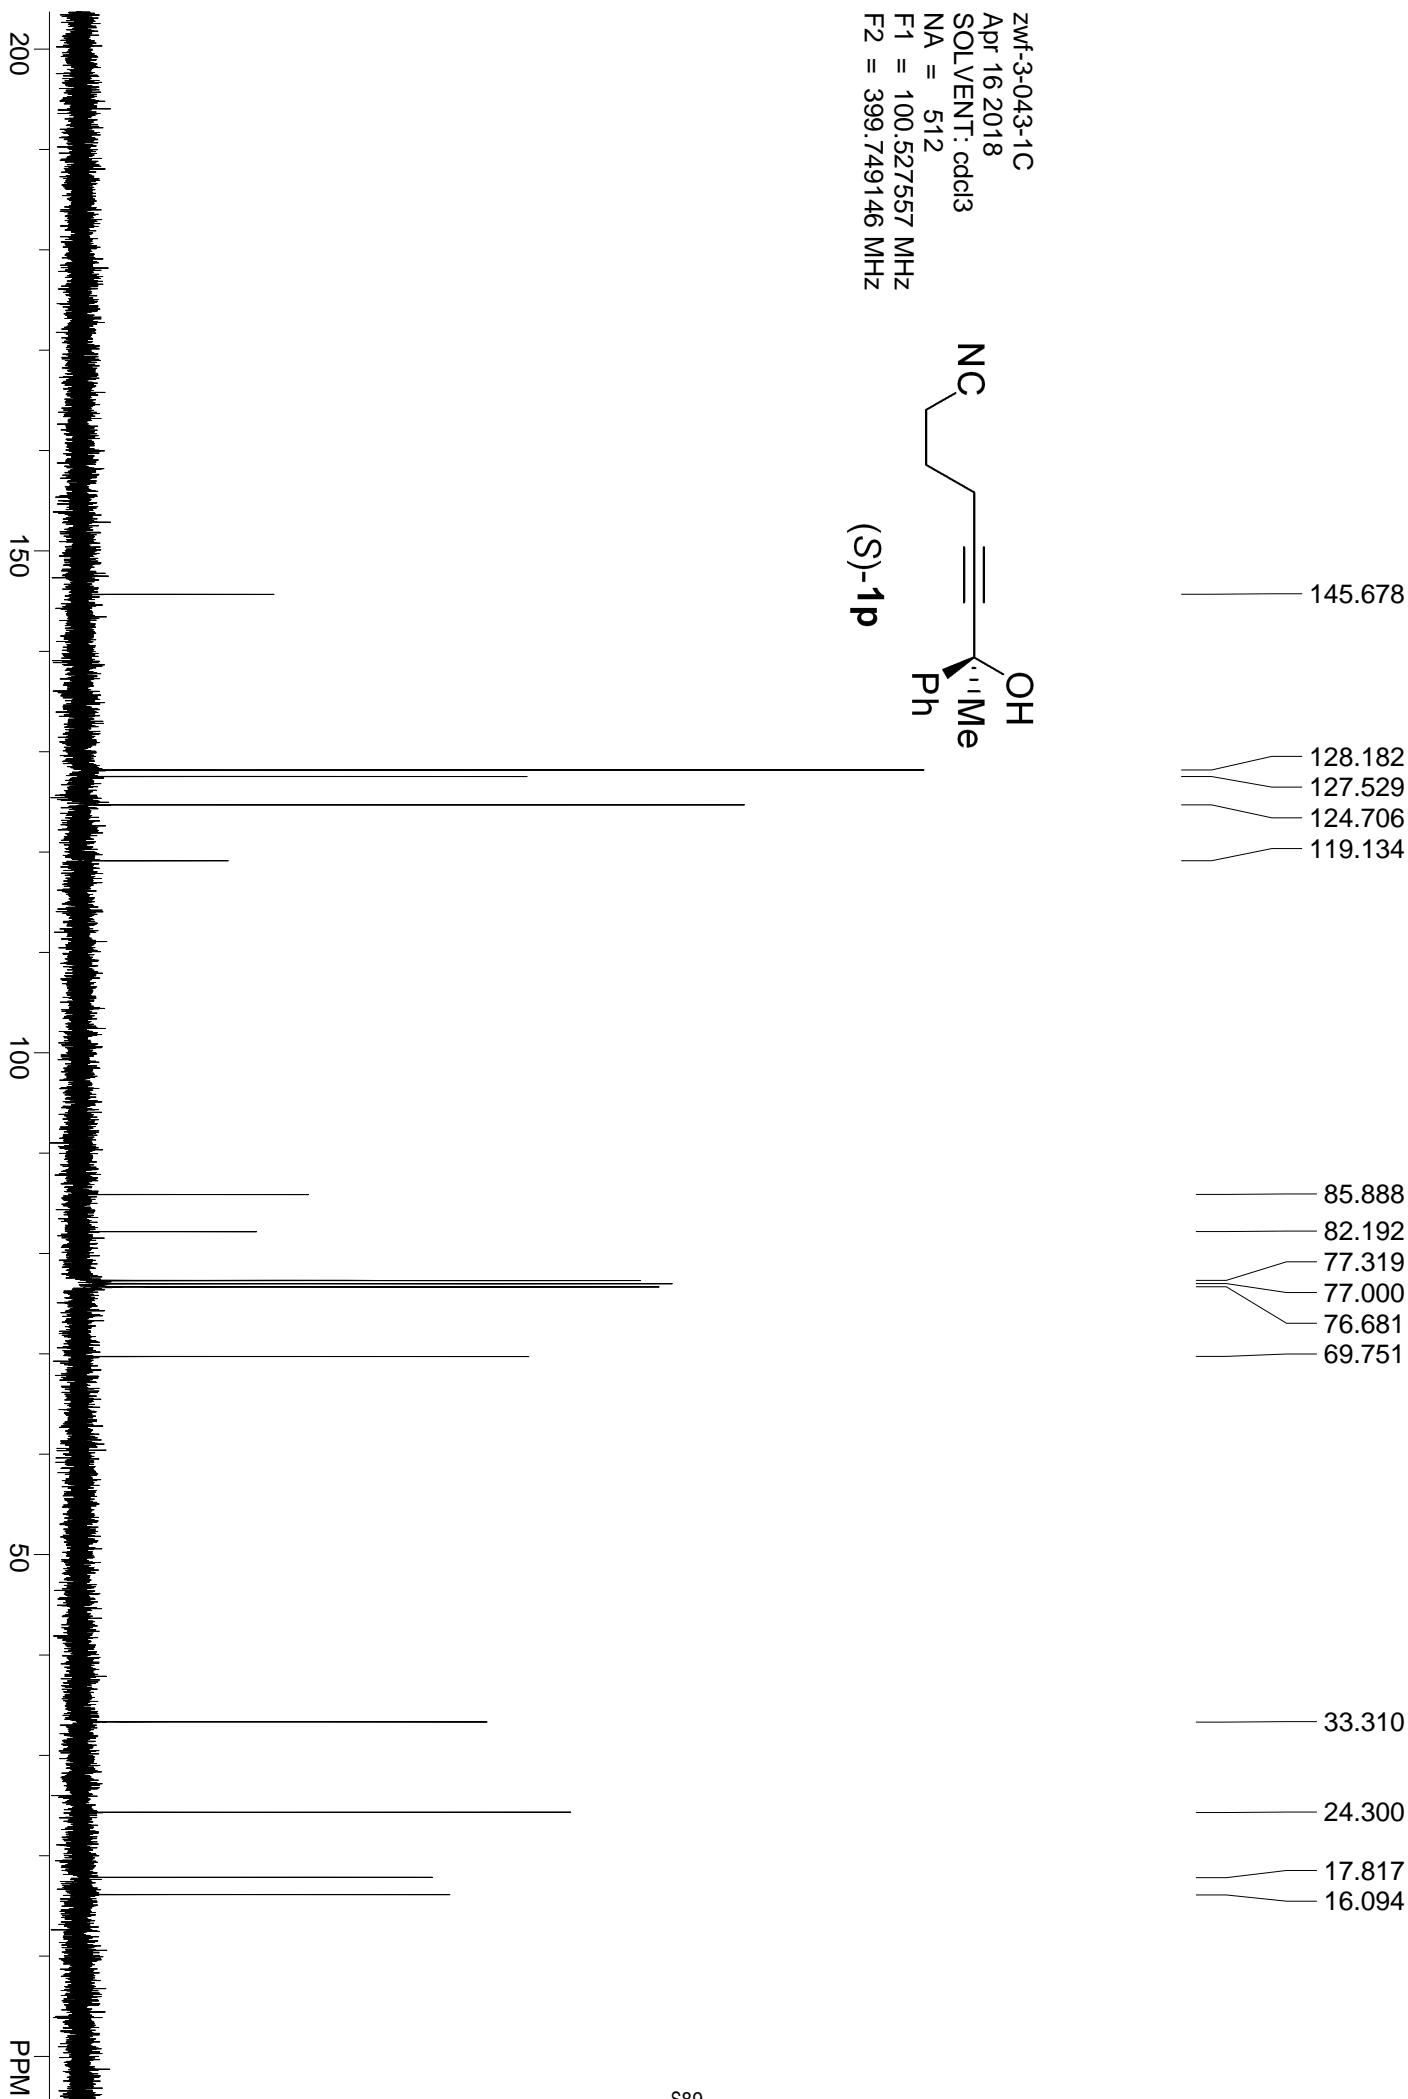

# zwf-3-043-1-AS-H-90-10-1.3-214

实验时间: 2018-04-16, 14:30:05  
谱图文件: E:\data\zwf\zwf-3-043-1.org  
方法文件: E:\data\yaoyuan\0414.mtd

报告时间: 2018-04-16, 15:03:00

实验内容简介:

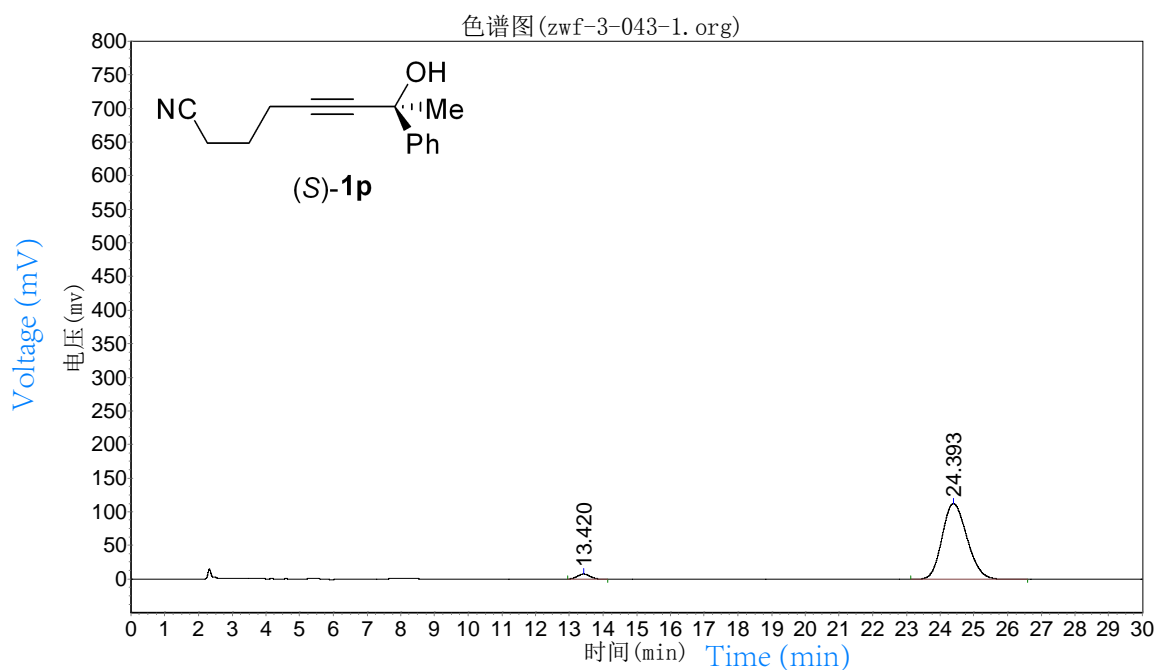

分析结果表

| 峰号 | 峰名 | 保留时间 RT [min] | 峰高 Height  | 峰面积 Area    | 含量 Area % |
|----|----|---------------|------------|-------------|-----------|
| 1  |    | 13.420        | 7437.636   | 187279.047  | 3.1397    |
| 2  |    | 24.393        | 112726.828 | 5777681.000 | 96.8603   |
| 总计 |    |               | 120164.464 | 5964960.047 | 100.0000  |

# zwf-3-043-1-rac-AS-H-90-10-1.3-214

实验时间: 2018-04-16, 13:58:15  
谱图文件: E:\data\zwf\zwf-3-043-1-rac.org  
方法文件: E:\data\yaoyuan\0414.mtd

报告时间: 2018-04-16, 14:33:01

实验内容简介:

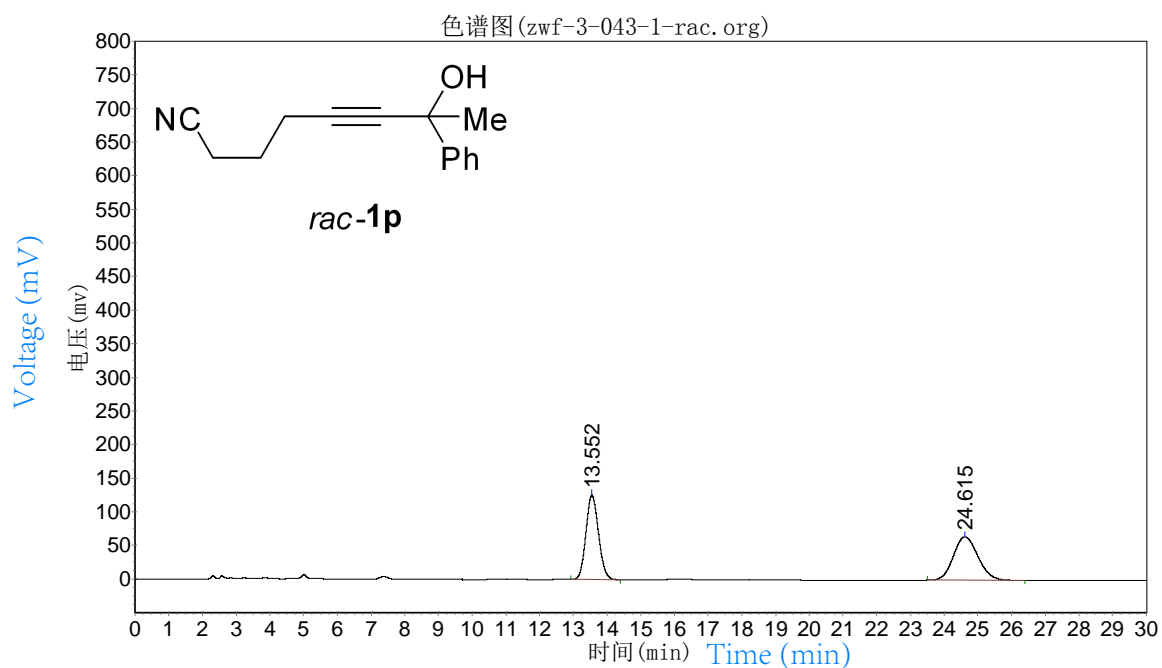

分析结果表

| 峰号 | 峰名 | 保留时间 RT [min] | 峰高 Height  | 峰面积 Area    | 含量 Area % |
|----|----|---------------|------------|-------------|-----------|
| 1  |    | 13.552        | 125189.141 | 3246437.750 | 49.9017   |
| 2  |    | 24.615        | 64463.164  | 3259226.750 | 50.0983   |
| 总计 |    |               | 189652.305 | 6505664.500 | 100.0000  |

ZWF-9-079-H  
Aug 19 2020  
SOLVENT: CDCl3  
NA = 4  
F1 = 400.130035 MHz  
F2 = 1.000000 MHz

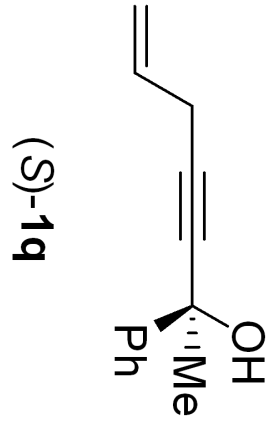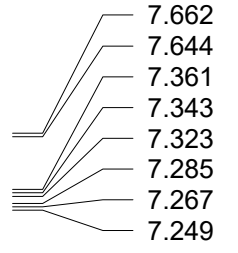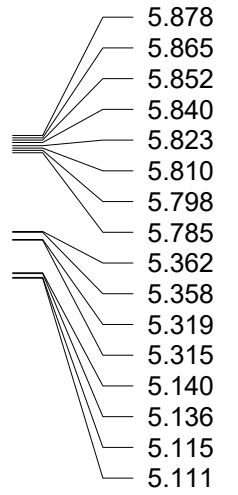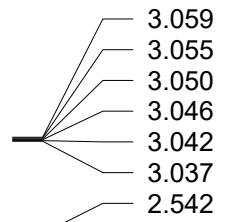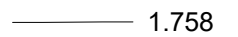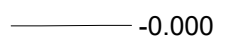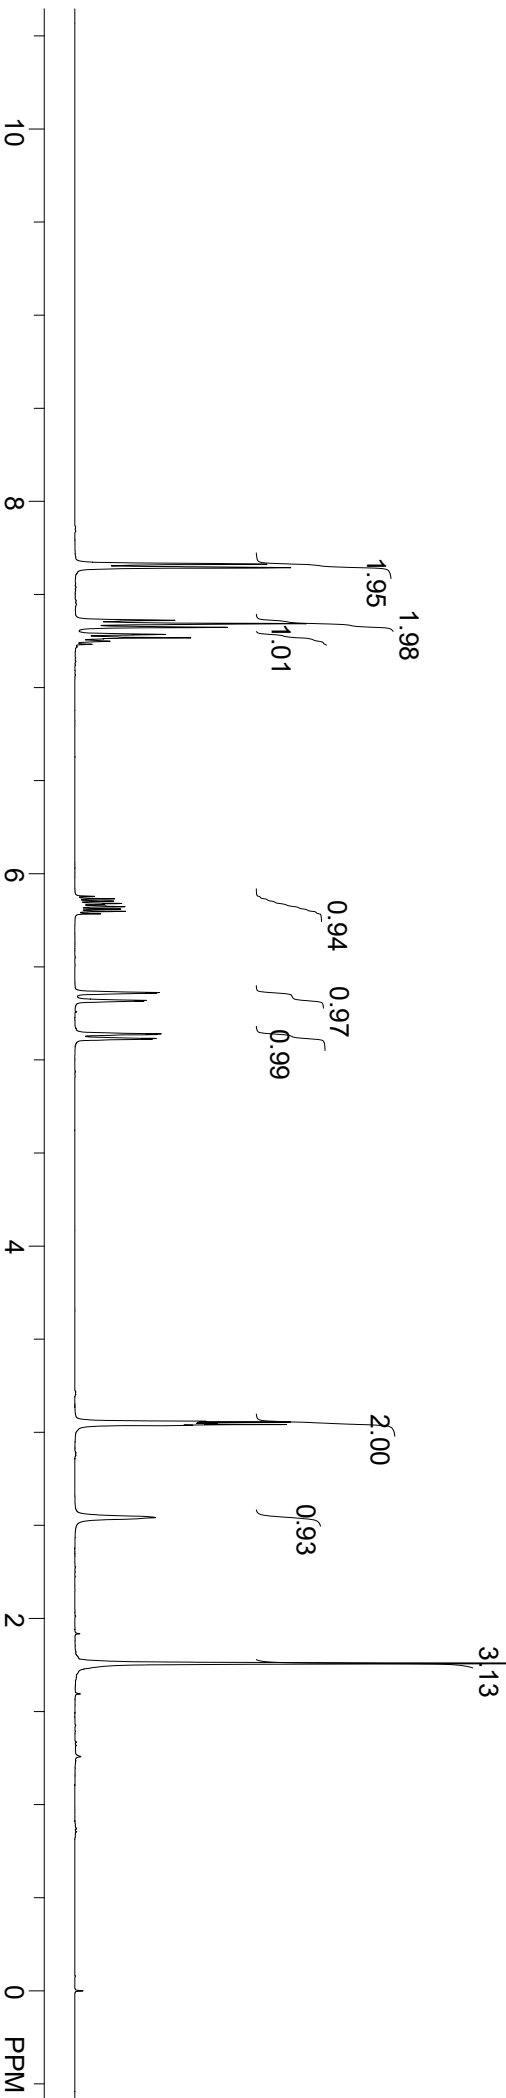

ZWf-9-079-C  
Aug 19 2020  
SOLVENT: CDCl3  
NA = 200  
F1 = 100.612770 MHz  
F2 = 1.000000 MHz

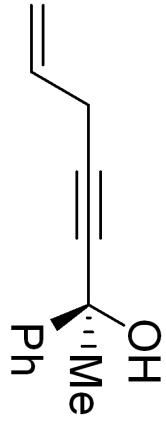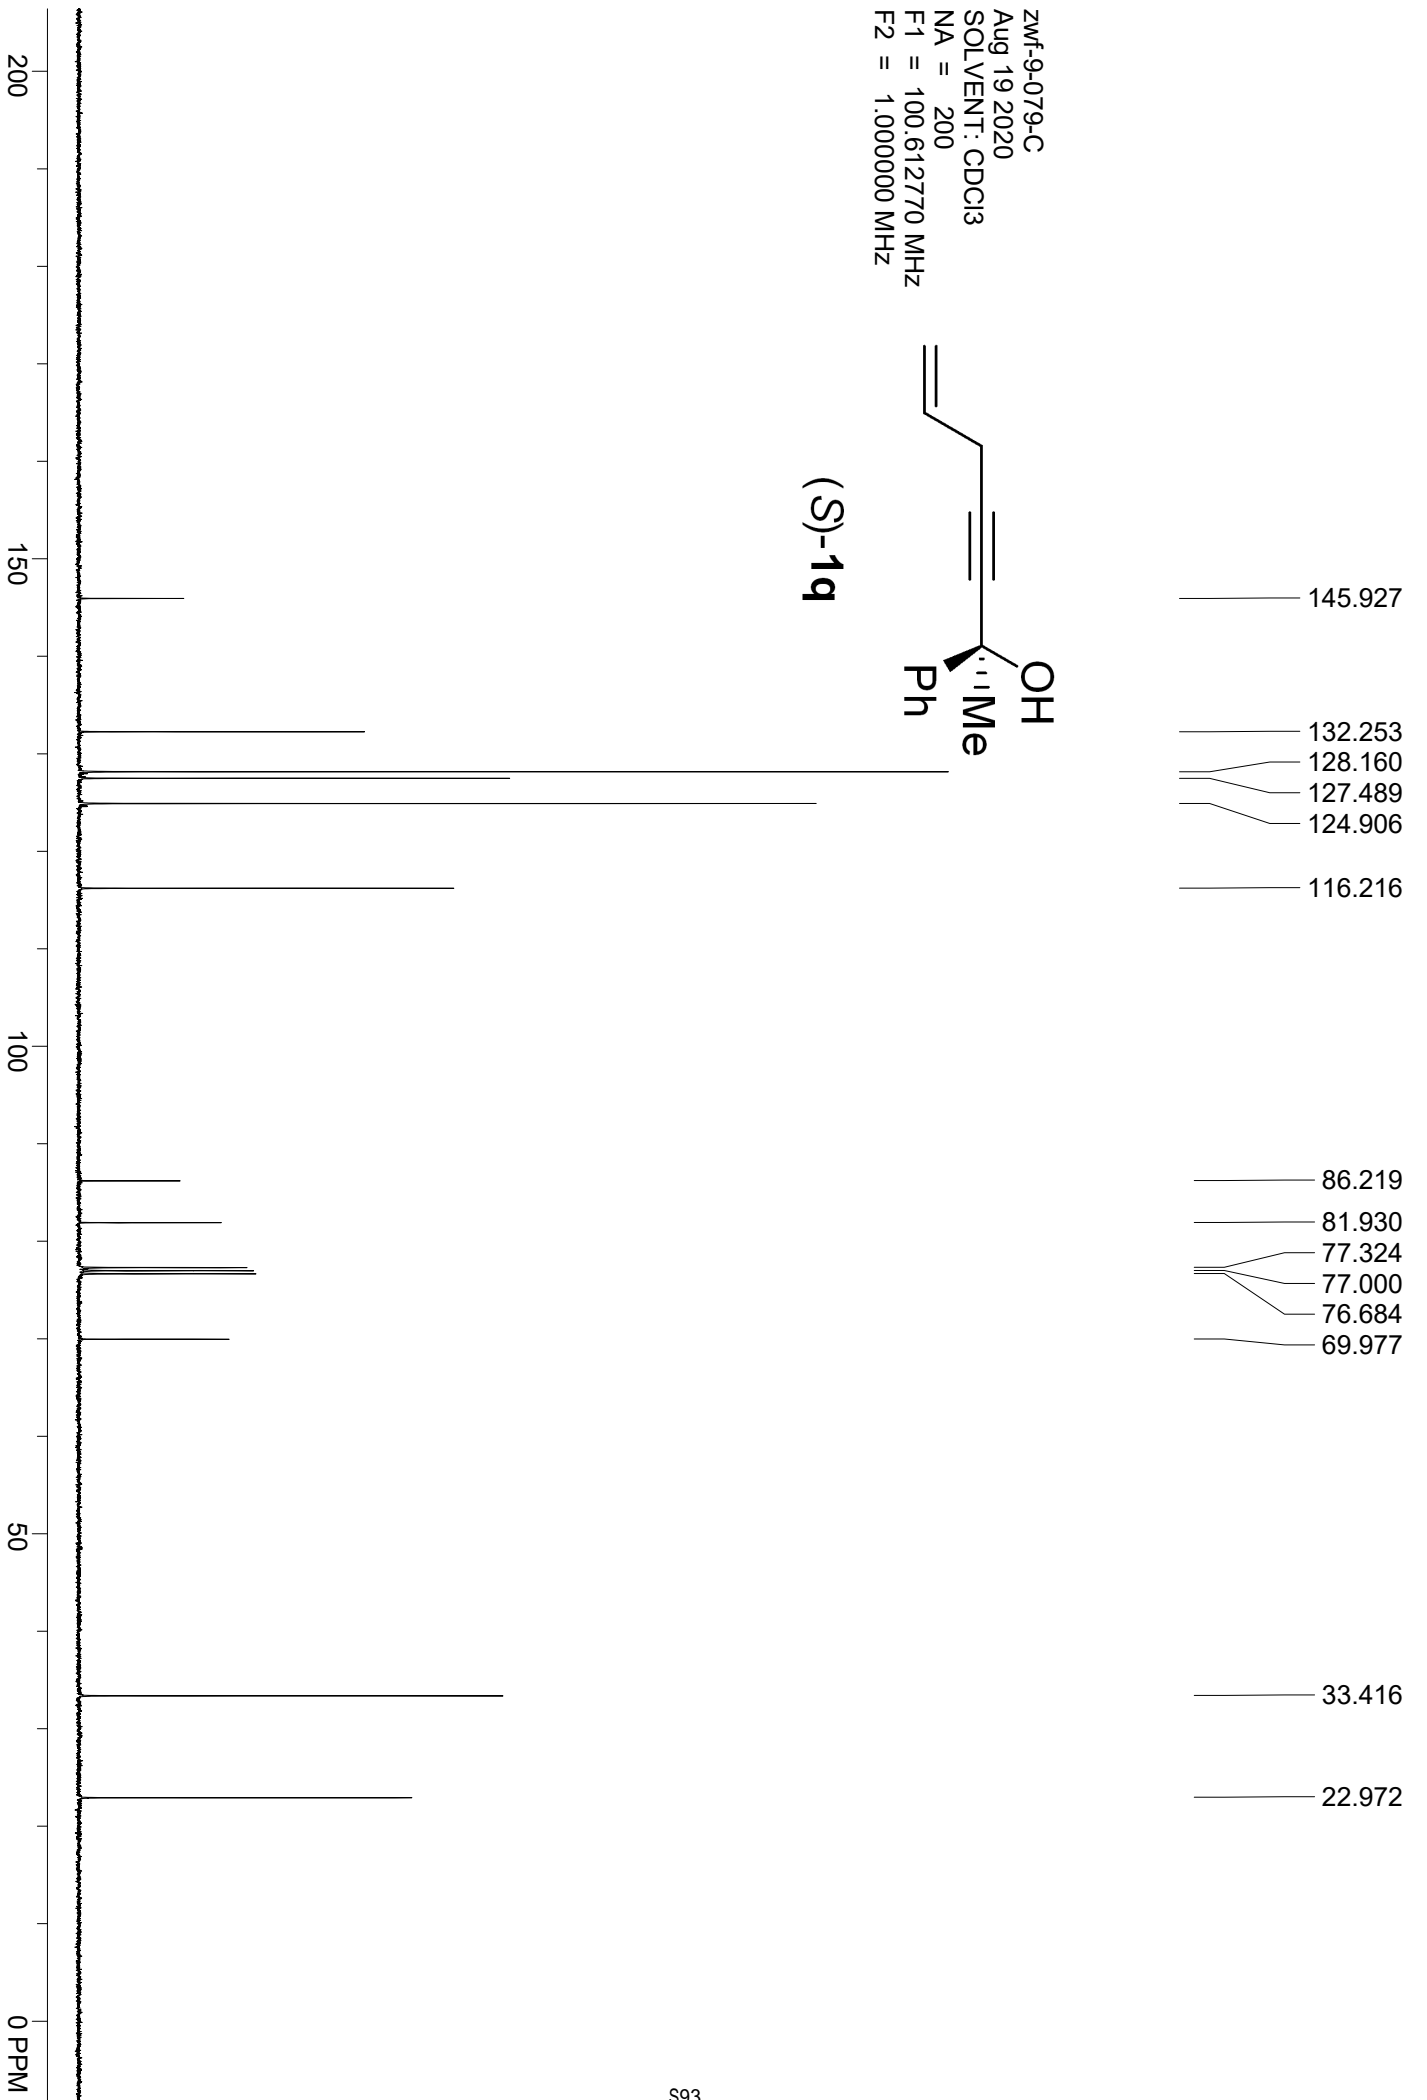

# Area Percent Report



Agilent Technologies

sample zwf-9-079-AS-H-98-2-1.0-214

Data file: C:\Users\Public\Documents\ChemStation\1\Data\YuanYuan 2020-08-17 15-30-05\132-P2-C5-zwf-9-079-1.D

## Acquisition Data:

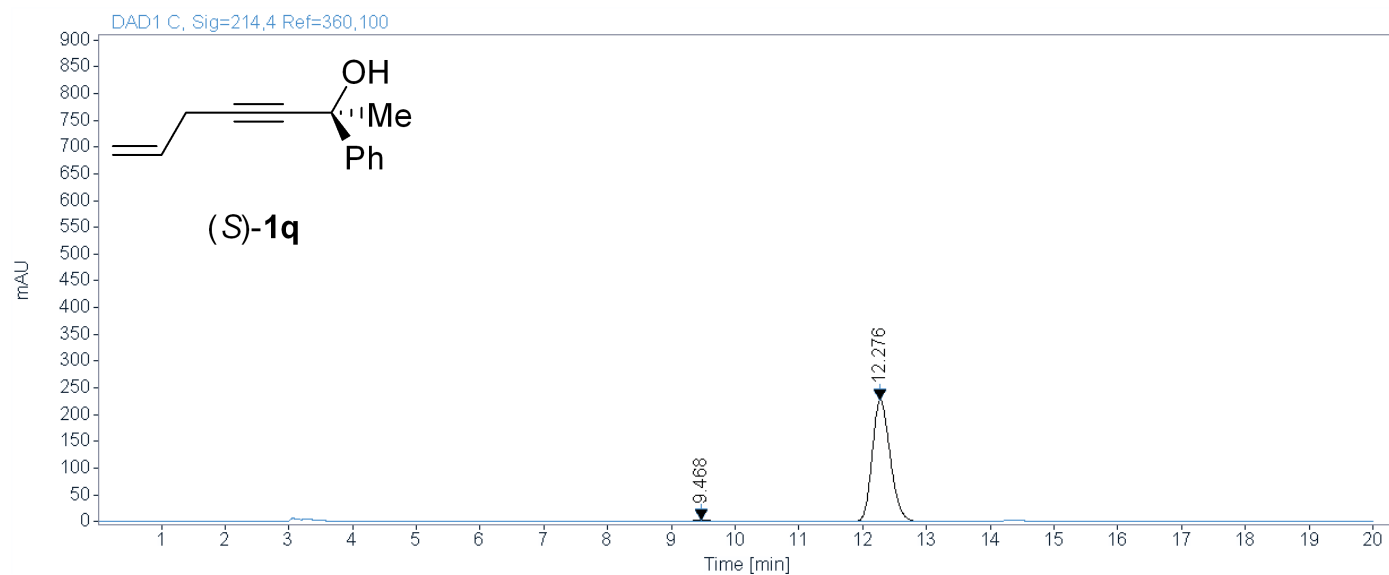

Signal: DAD1 C, Sig=214,4 Ref=360,100

| RT [min] | Width [min] | Height   | Area      | Area%    |
|----------|-------------|----------|-----------|----------|
| 9.468    | 0.2761      | 3.6310   | 66.0091   | 1.4600   |
| 12.276   | 0.3041      | 227.8208 | 4455.1304 | 98.5400  |
|          | Sum         |          | 4521.1394 | 100.0000 |

# Area Percent Report



Agilent Technologies

sample zwf-9-079-rac-AS-H-98-2-1.0-214

Data file: C:\Users\Public\Documents\ChemStation\1\Data\YuanYuan 2020-08-17 15-30-05\133-P2-C6-zwf-9-079-1-rac.D

## Acquisition Data:

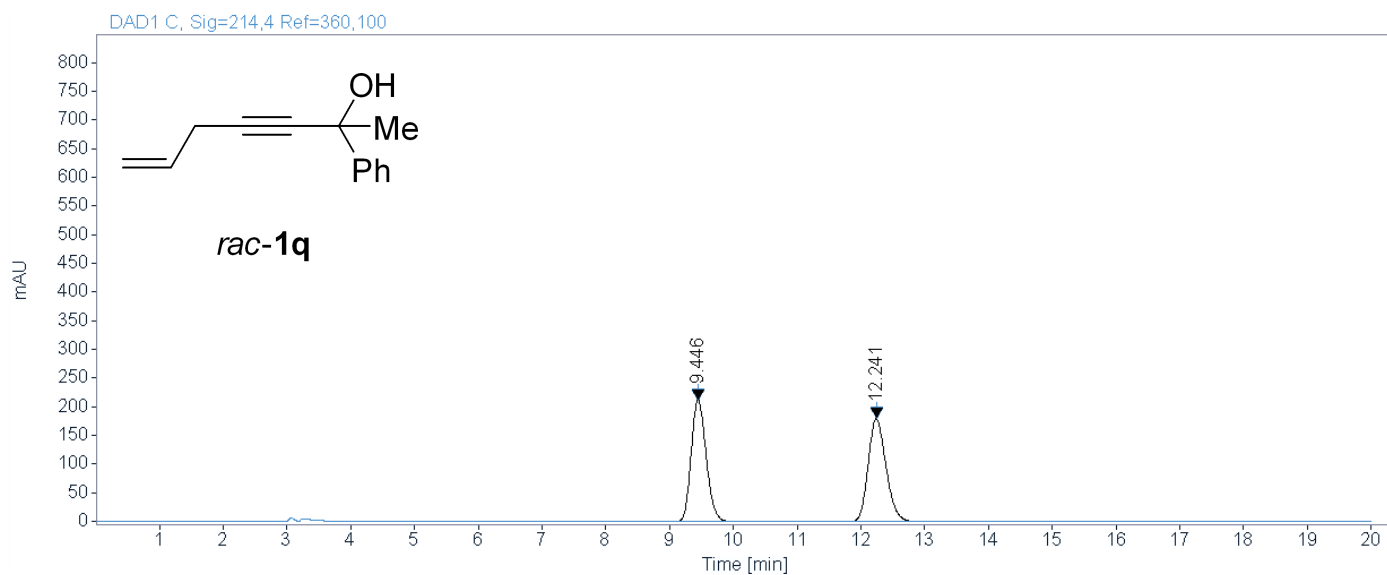

Signal: DAD1 C, Sig=214,4 Ref=360,100

| RT [min] | Width [min] | Height   | Area      | Area%    |
|----------|-------------|----------|-----------|----------|
| 9.446    | 0.2577      | 212.5906 | 3492.5410 | 49.9381  |
| 12.241   | 0.3037      | 179.4059 | 3501.1985 | 50.0619  |
| Sum      |             |          | 6993.7395 | 100.0000 |

ZWF-4-137-1  
Nov 10 2018  
SOLVENT: CDCl3  
NA = 4  
F1 = 400.130005 MHz  
F2 = 1.000000 MHz

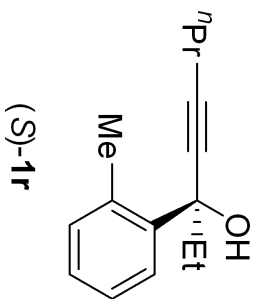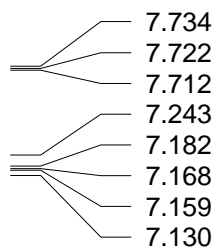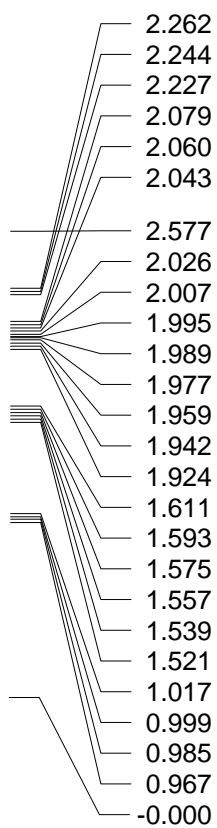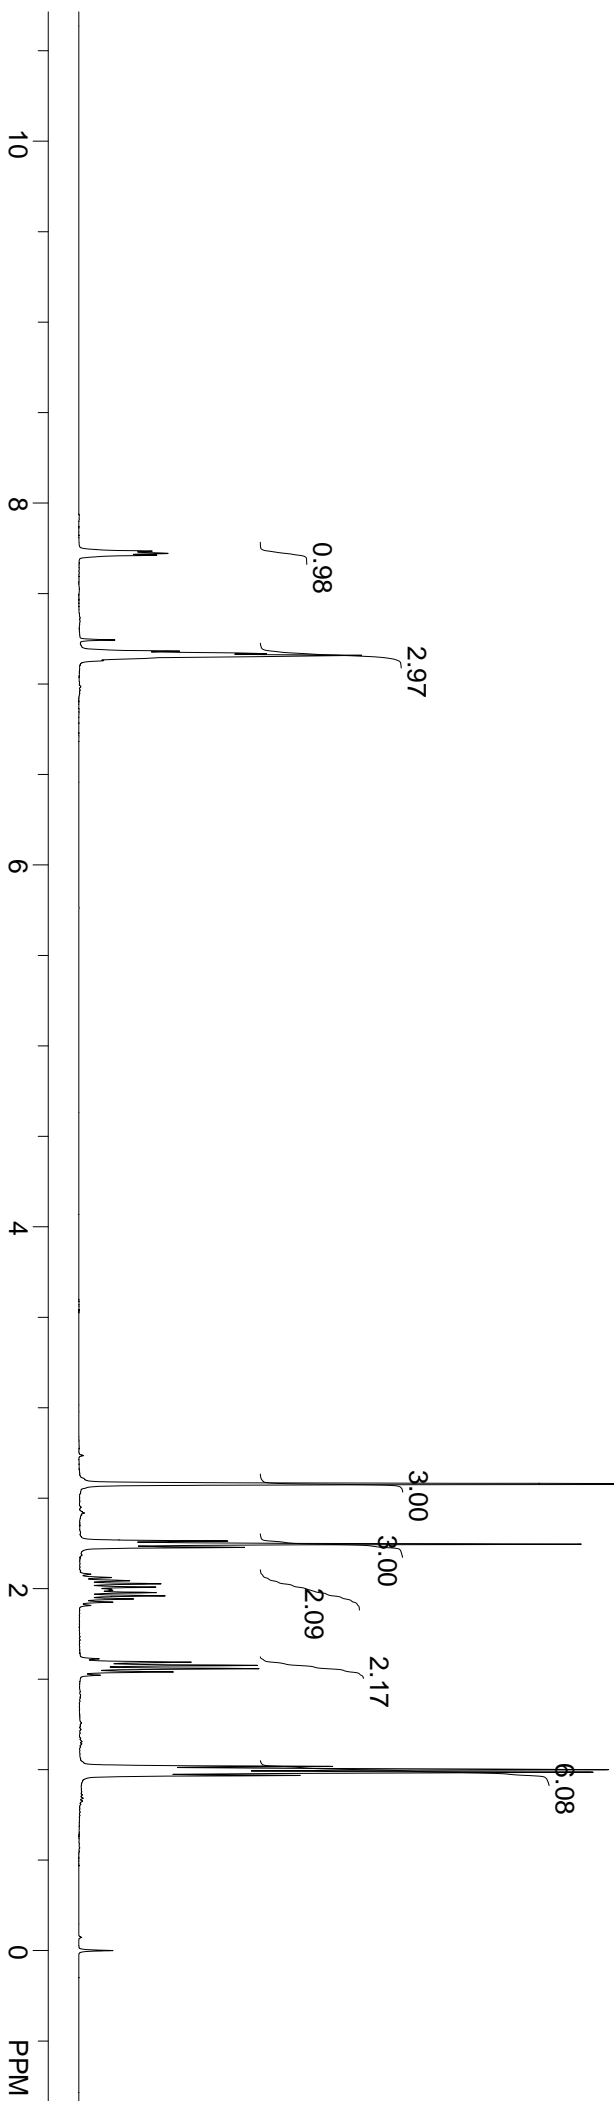



Zwf-4-137-1  
Nov 10 2018  
SOLVENT: CDCl3  
NA = 200  
F1 = 100.612770 MHz  
F2 = 1.000000 MHz

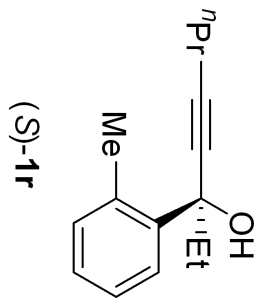

- 142.009
- 135.405
- 132.189
- 127.323
- 126.241
- 125.403
  
- 86.535
- 83.059
- 77.316
- 77.000
- 76.684
- 73.793
  
- 35.256
  
- 22.048
- 21.305
- 20.768
- 13.555
  
- 8.910

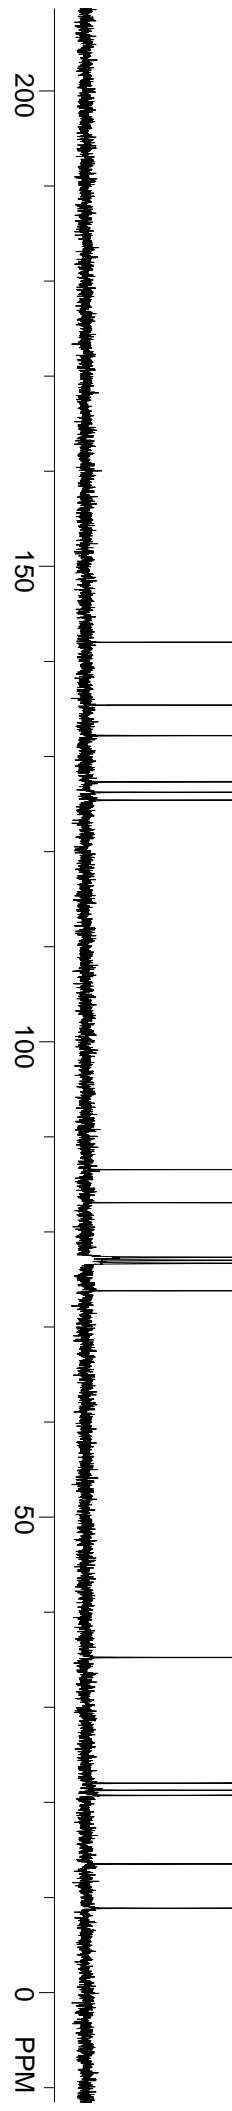

# zwf-4-137-1-AS-H-98-2-1.0-214

实验时间: 2018-11-09, 21:07:30

报告时间: 2018-11-09, 21:46:33

谱图文件: E:\data\zwf\zwf-4-137-1-AS-H-90-10-1.0-214-1.org

实验内容简介:

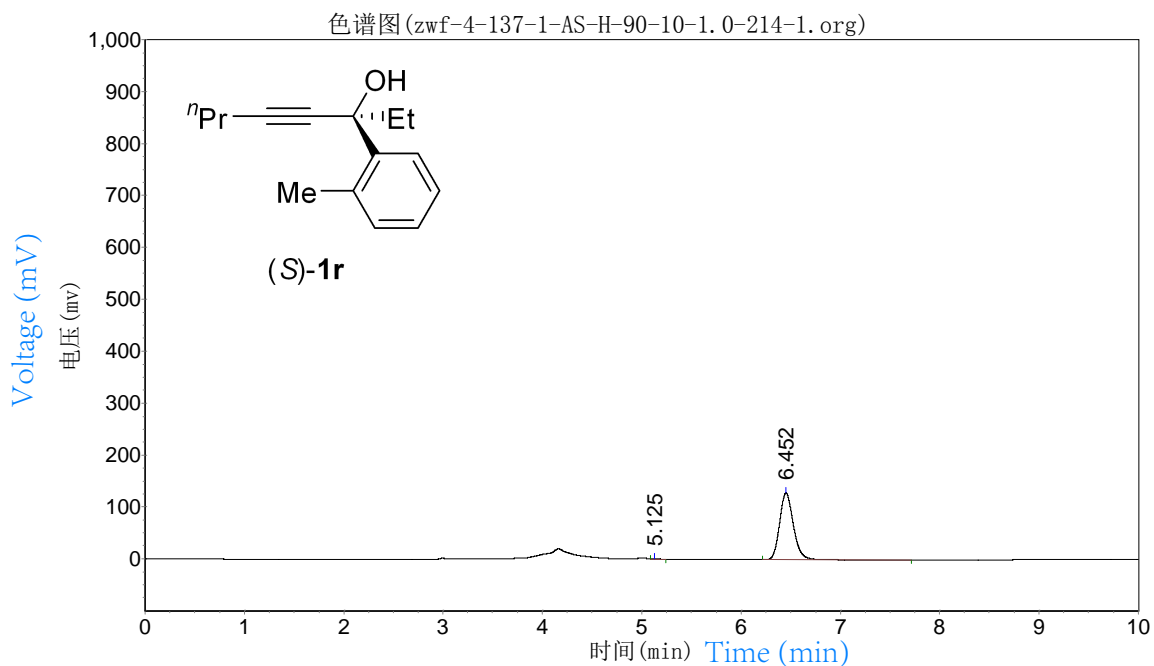

分析结果表

| 峰号 | 峰名 | 保留时间 RT [min] | 峰高 Height  | 峰面积 Area    | 含量 Area % |
|----|----|---------------|------------|-------------|-----------|
| 1  |    | 5.125         | 959.209    | 5468.495    | 0.4388    |
| 2  |    | 6.452         | 128742.766 | 1240850.125 | 99.5612   |
| 总计 |    |               | 129701.974 | 1246318.620 | 100.0000  |

# zwf-4-137-1-rac-AS-H-98-2-1.0-214

实验时间: 2018-11-09, 21:31:33

报告时间: 2018-11-09, 21:47:12

谱图文件: E:\data\zwf\zwf-4-137-1-rac-AS-H-90-10-1.0-214.org

实验内容简介:

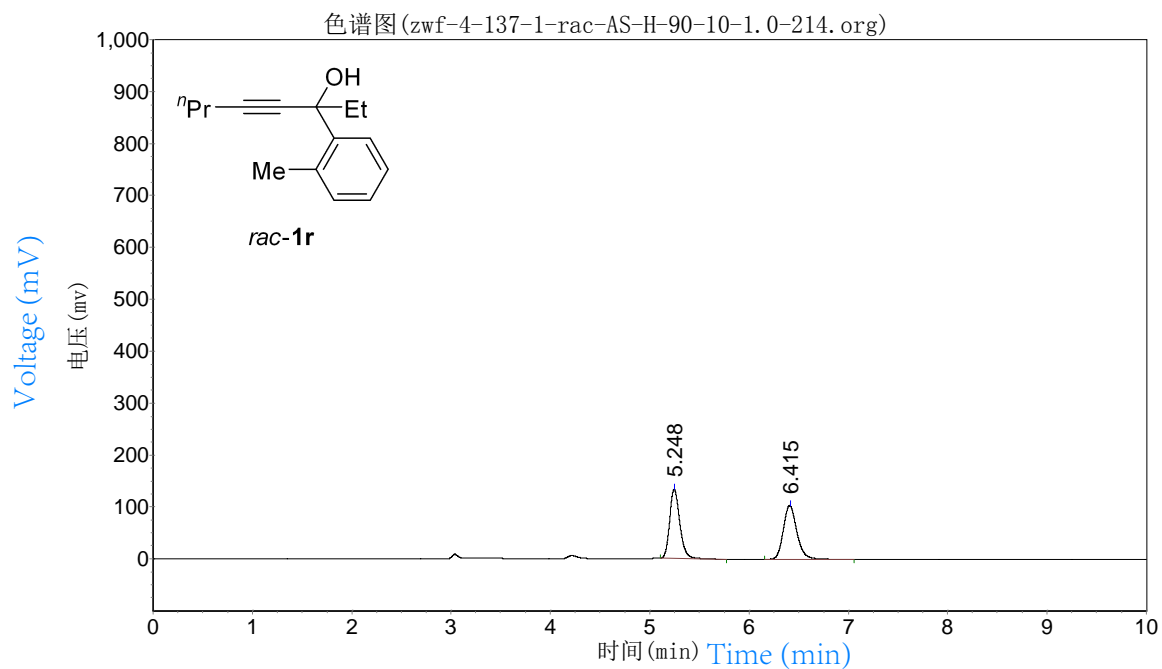

分析结果表

| 峰号 | 峰名 | 保留时间 RT [min] | 峰高 Height  | 峰面积 Area    | 含量 Area % |
|----|----|---------------|------------|-------------|-----------|
| 1  |    | 5.248         | 134365.906 | 975821.063  | 50.1024   |
| 2  |    | 6.415         | 103029.656 | 971831.688  | 49.8976   |
| 总计 |    |               | 237395.563 | 1947652.750 | 100.0000  |

ZWF-3-142-1H  
Jun 12 2018  
SOLVENT: CDCl3  
NA = 4  
F1 = 400.132477 MHz  
F2 = 1.000000 MHz

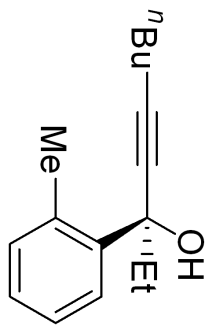

- 7.733
- 7.724
- 7.711
- 7.702
- 7.694
- 7.218
- 7.178
- 7.170
- 7.160
- 7.156
- 7.147
- 7.139
- 7.131
- 7.117

- 2.319
- 2.274
- 2.257
- 2.239
- 2.066
- 2.048
- 2.030
- 2.013
- 1.995
- 1.984
- 2.567
- 1.976
- 1.966
- 1.948
- 1.929
- 1.913
- 1.895
- 1.556
- 1.539
- 1.519
- 1.501
- 1.483
- 1.463
- 1.445
- 1.426
- 1.407
- 1.389
- 1.372
- 0.993
- 0.975
- 0.956
- 0.929
- 0.911
- 0.893

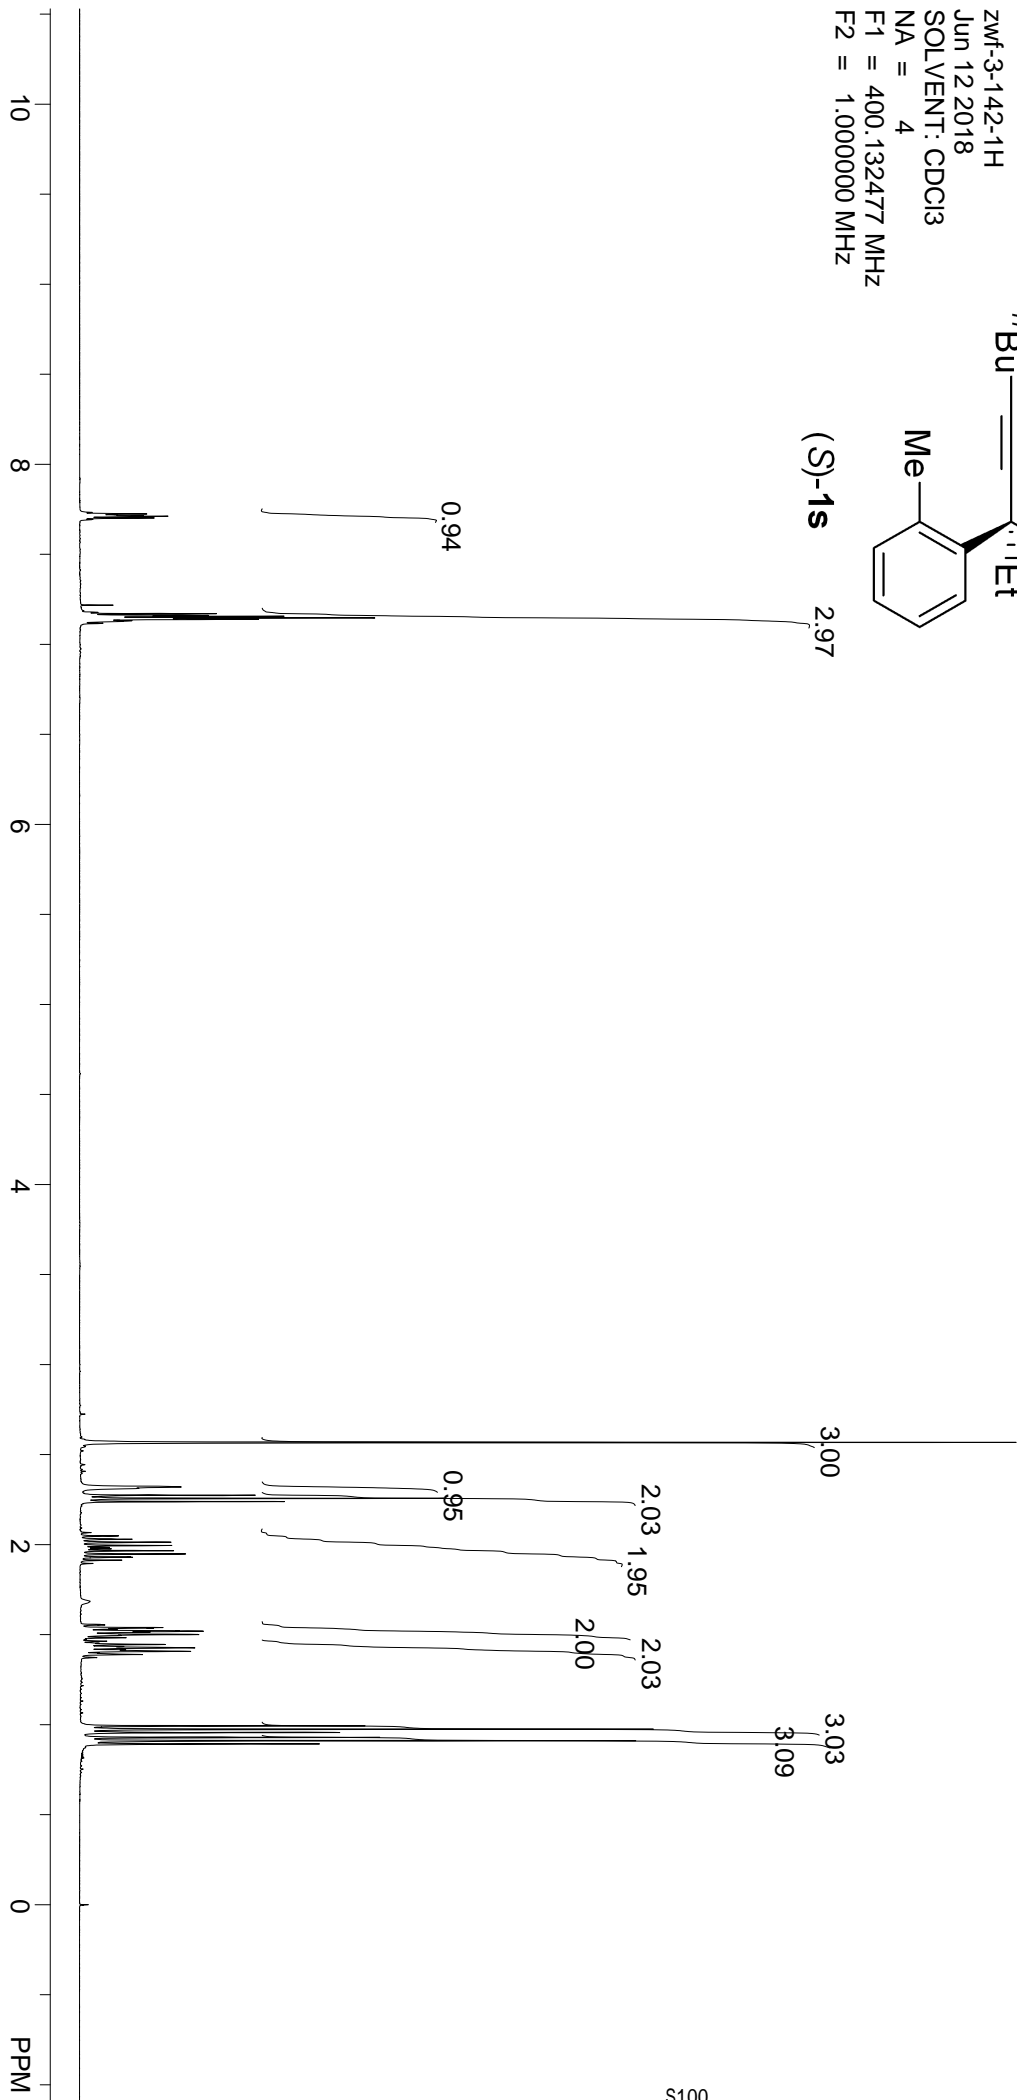

ZWF-3-142-1C  
Jun 12 2018  
SOLVENT: CDCl3  
NA = 60  
F1 = 100.612770 MHz  
F2 = 1.000000 MHz

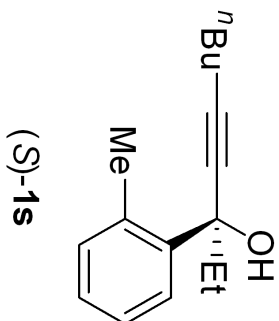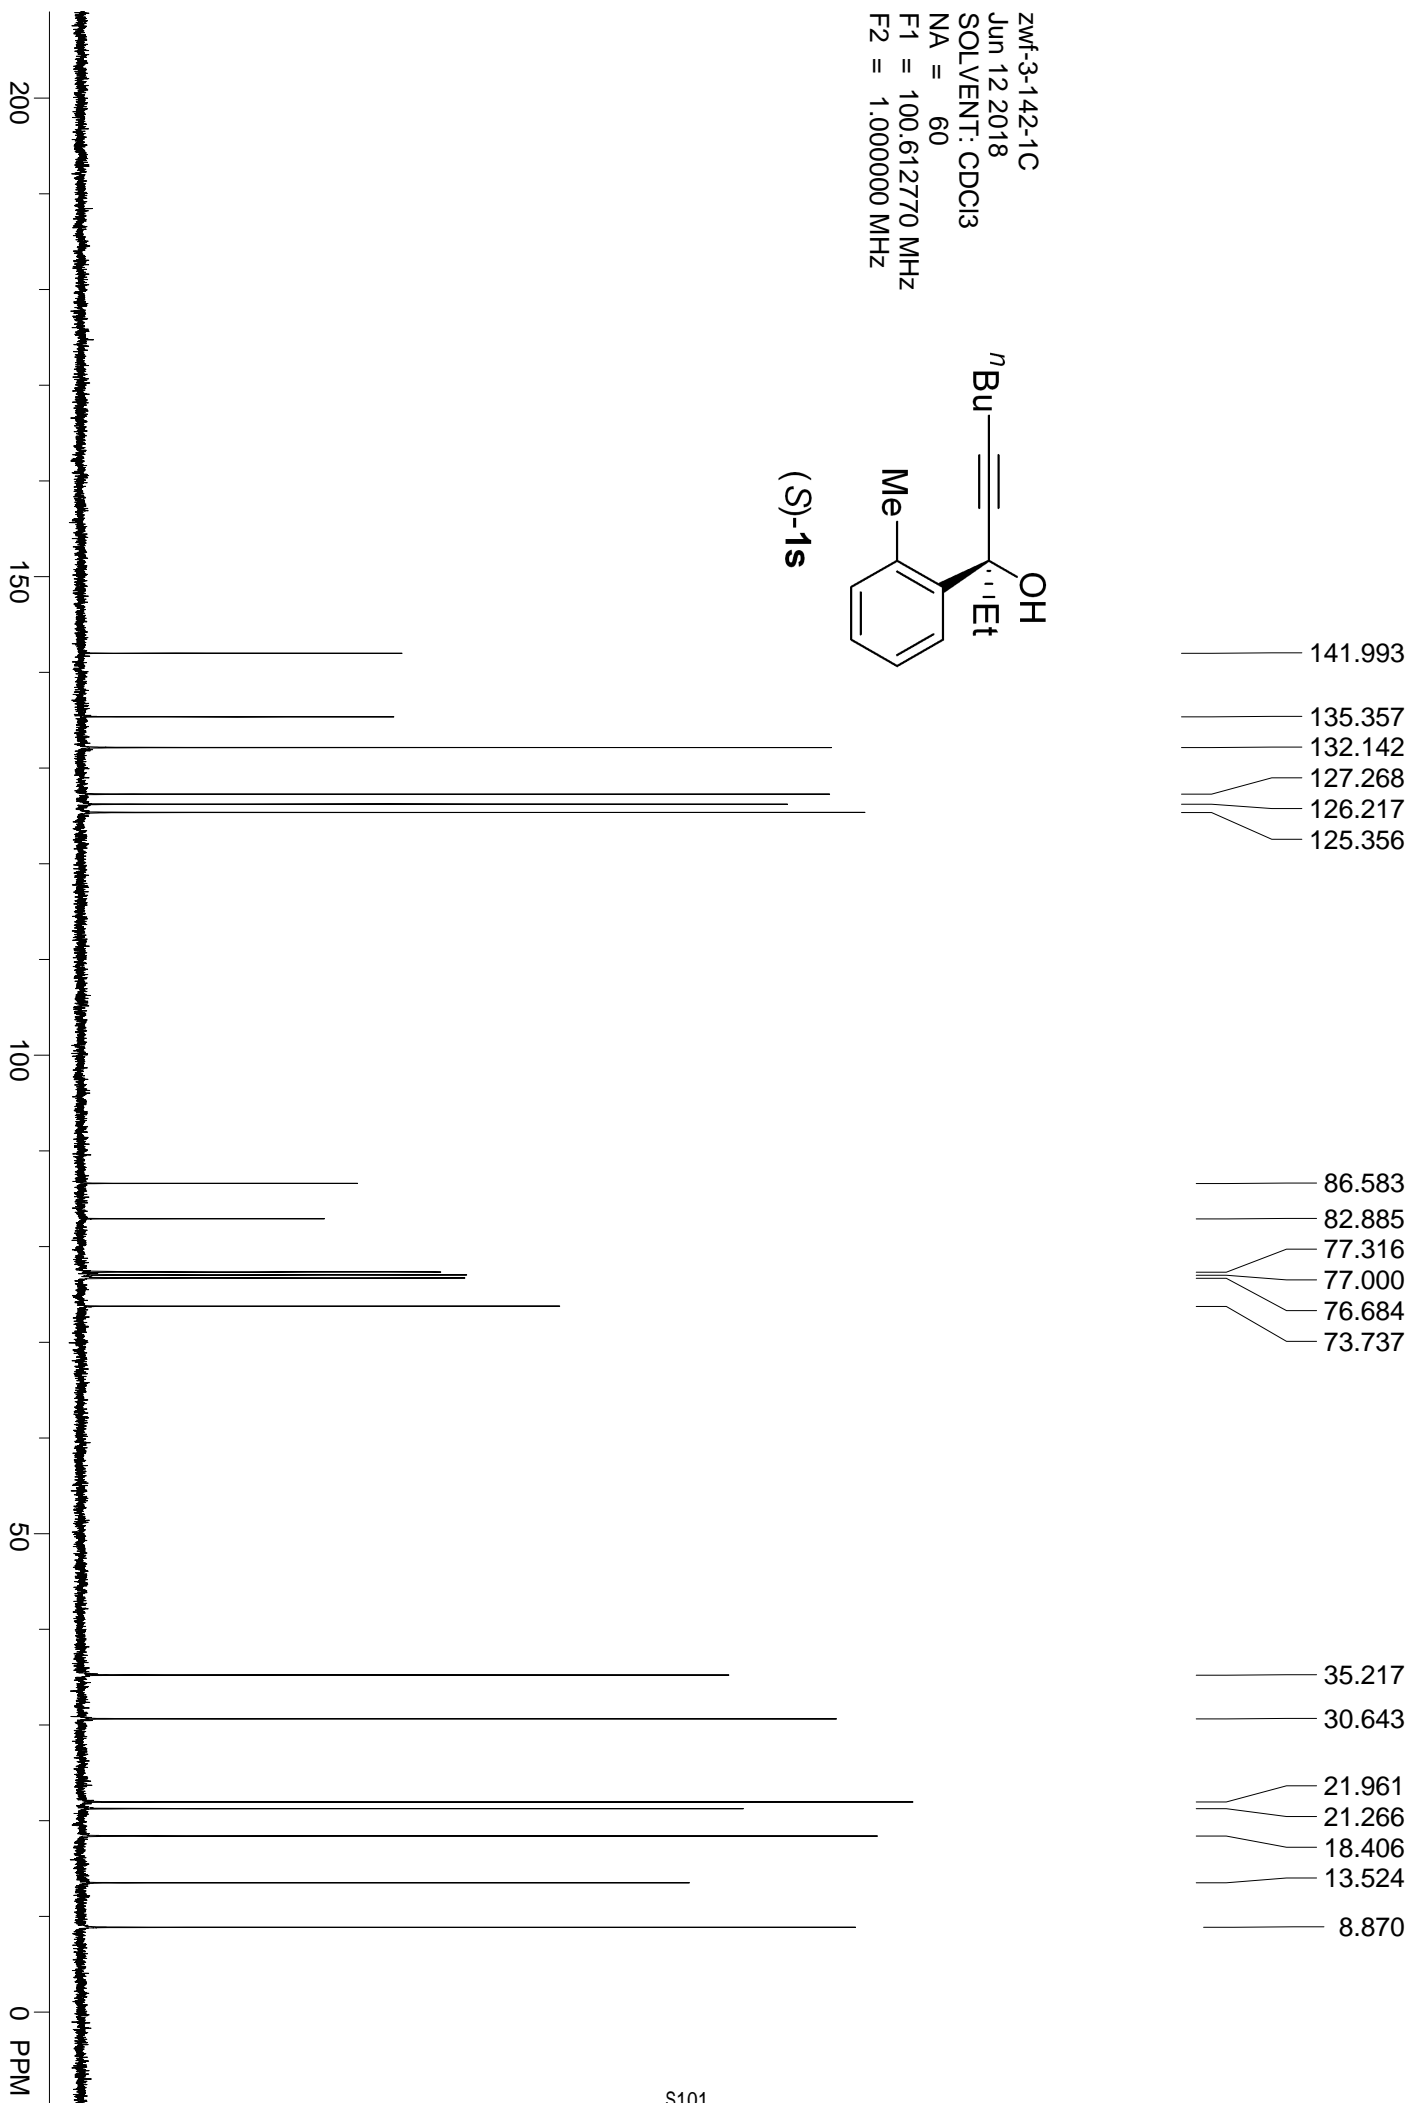

# zwf-3-142-1-AS-H-98-2-1.0-214

实验时间: 2018-06-12, 17:08:01

报告时间: 2018-06-12, 17:32:44

谱图文件: E:\data\zwf\zwf-3-142-1-AS-H-98-2-1.0-214.org

实验内容简介:

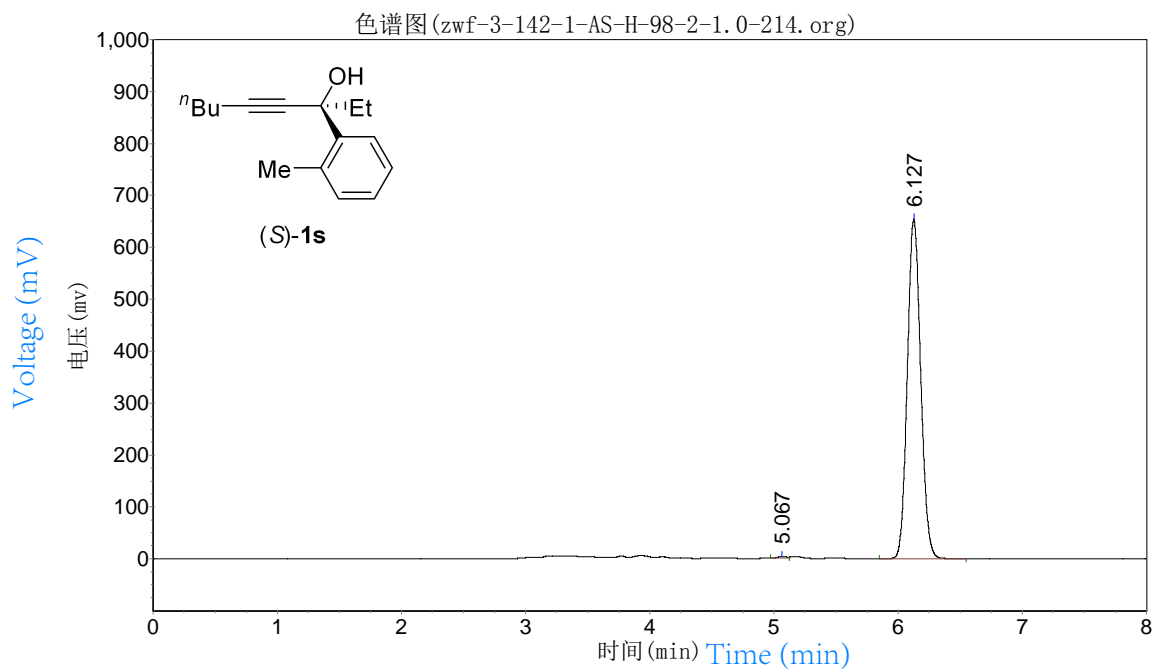

分析结果表

| 峰号 | 峰名 | 保留时间 RT [min] | 峰高 Height  | 峰面积 Area    | 含量 Area % |
|----|----|---------------|------------|-------------|-----------|
| 1  |    | 5.067         | 3182.304   | 18142.625   | 0.3693    |
| 2  |    | 6.127         | 653425.688 | 4894885.500 | 99.6307   |
| 总计 |    |               | 656607.991 | 4913028.125 | 100.0000  |

# zwf-3-142-1-rac-AS-H-98-2-1.0-214

实验时间: 2018-06-12, 17:20:41

报告时间: 2018-06-12, 17:31:56

谱图文件: E:\data\zwf\zwf-3-142-1-rac-AS-H-98-2-1.0-214.org

实验内容简介:

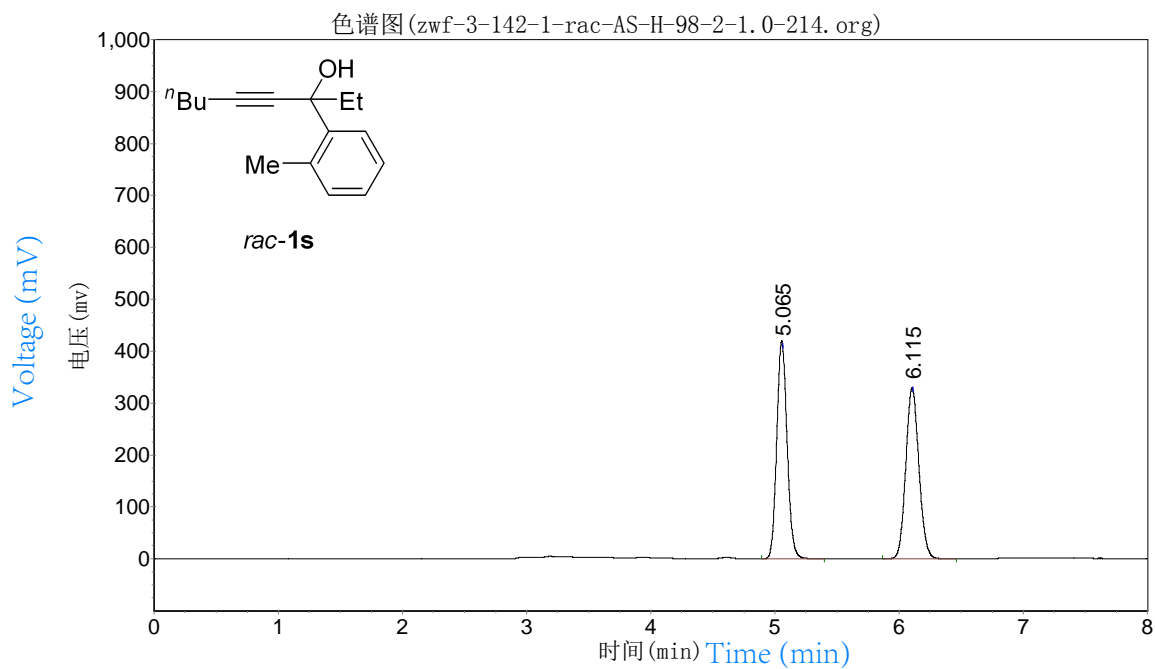

分析结果表

| 峰号 | 峰名 | 保留时间 RT [min] | 峰高 Height  | 峰面积 Area    | 含量 Area % |
|----|----|---------------|------------|-------------|-----------|
| 1  |    | 5.065         | 415529.375 | 2439057.500 | 50.1080   |
| 2  |    | 6.115         | 327165.250 | 2428547.750 | 49.8920   |
| 总计 |    |               | 742694.625 | 4867605.250 | 100.0000  |

zwf-8-080-1  
May 12 2020  
SOLVENT: CDCl3  
NA = 4  
F1 = 400.130035 MHz  
F2 = 1.000000 MHz

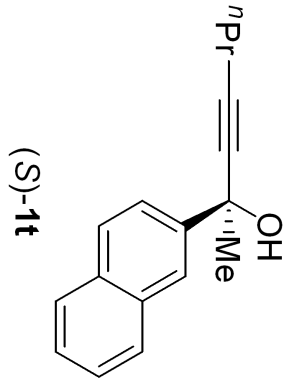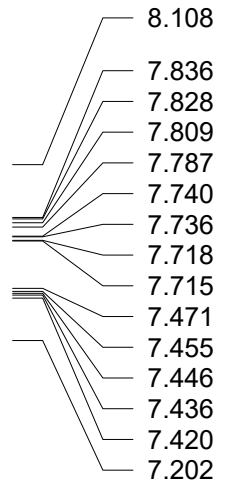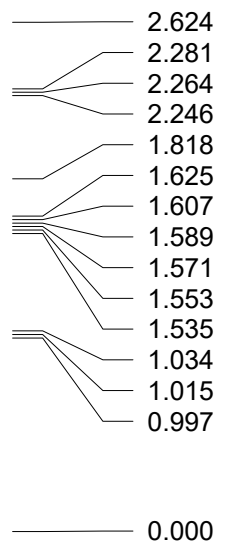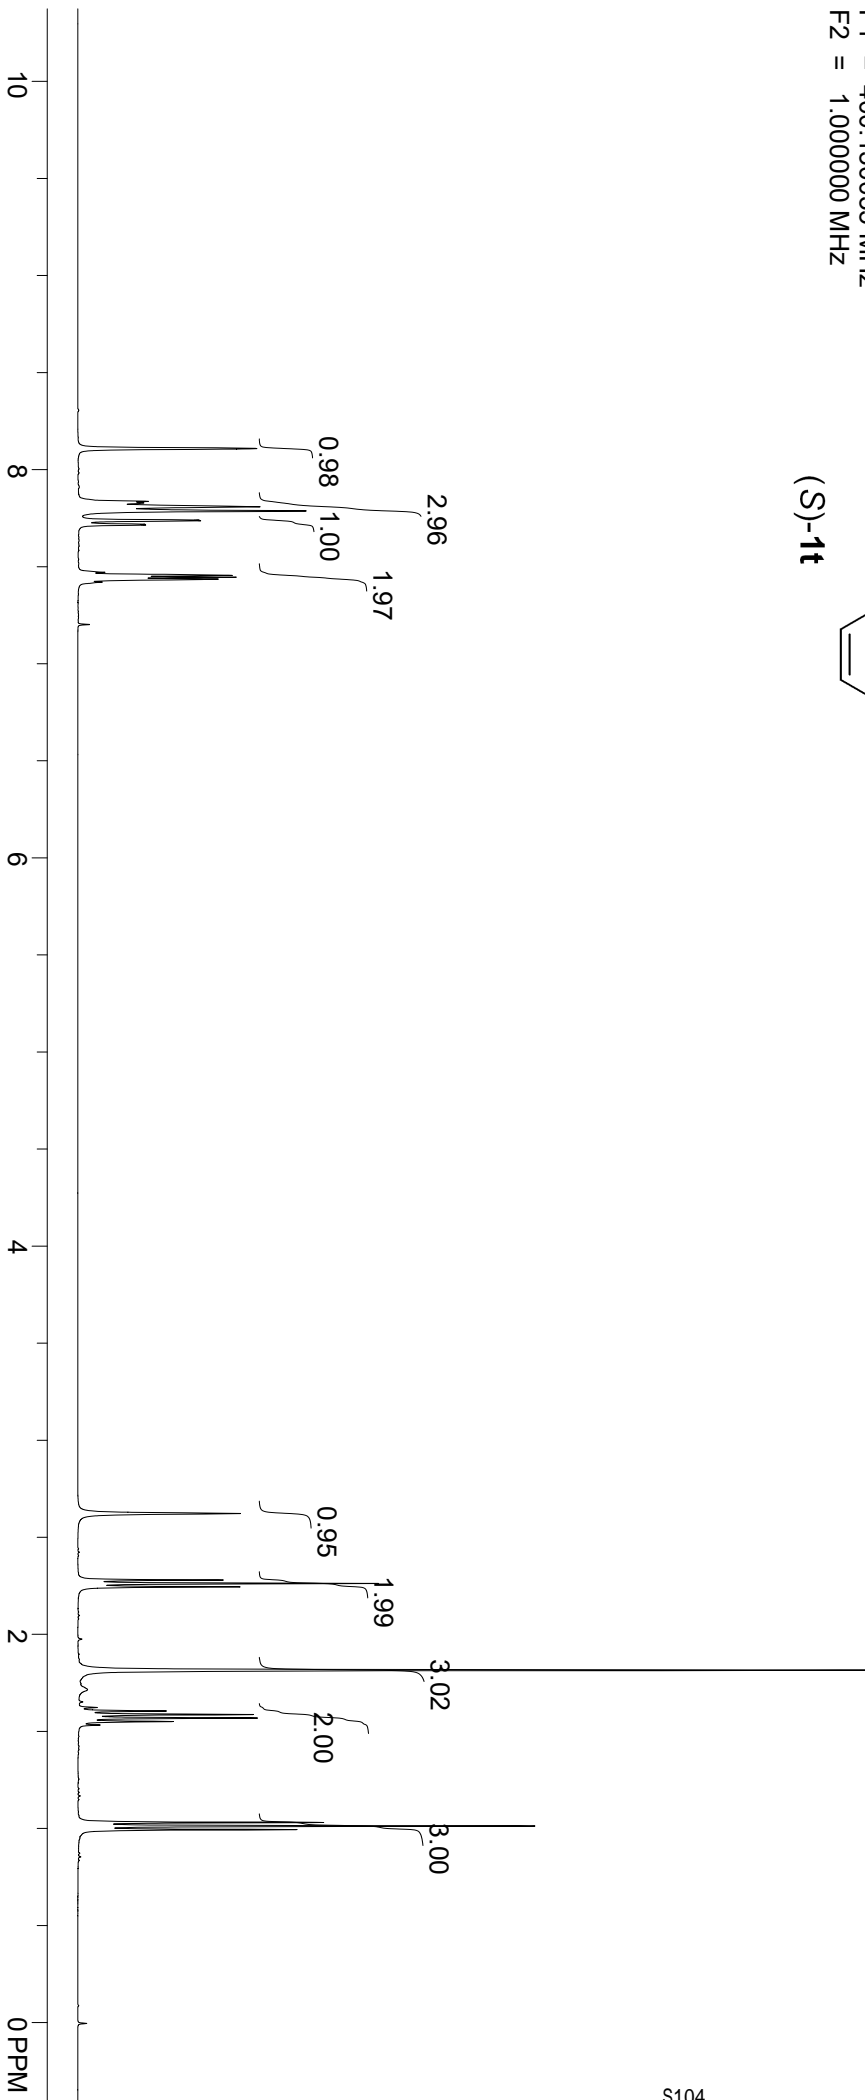



zwf-8-080-1C  
May 12 2020  
SOLVENT: CDCl3  
NA = 100  
F1 = 100.612770 MHz  
F2 = 1.000000 MHz

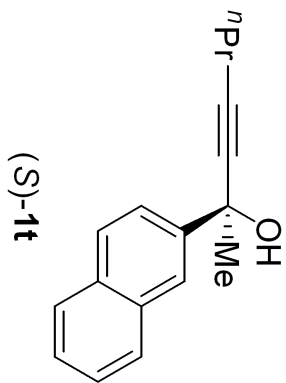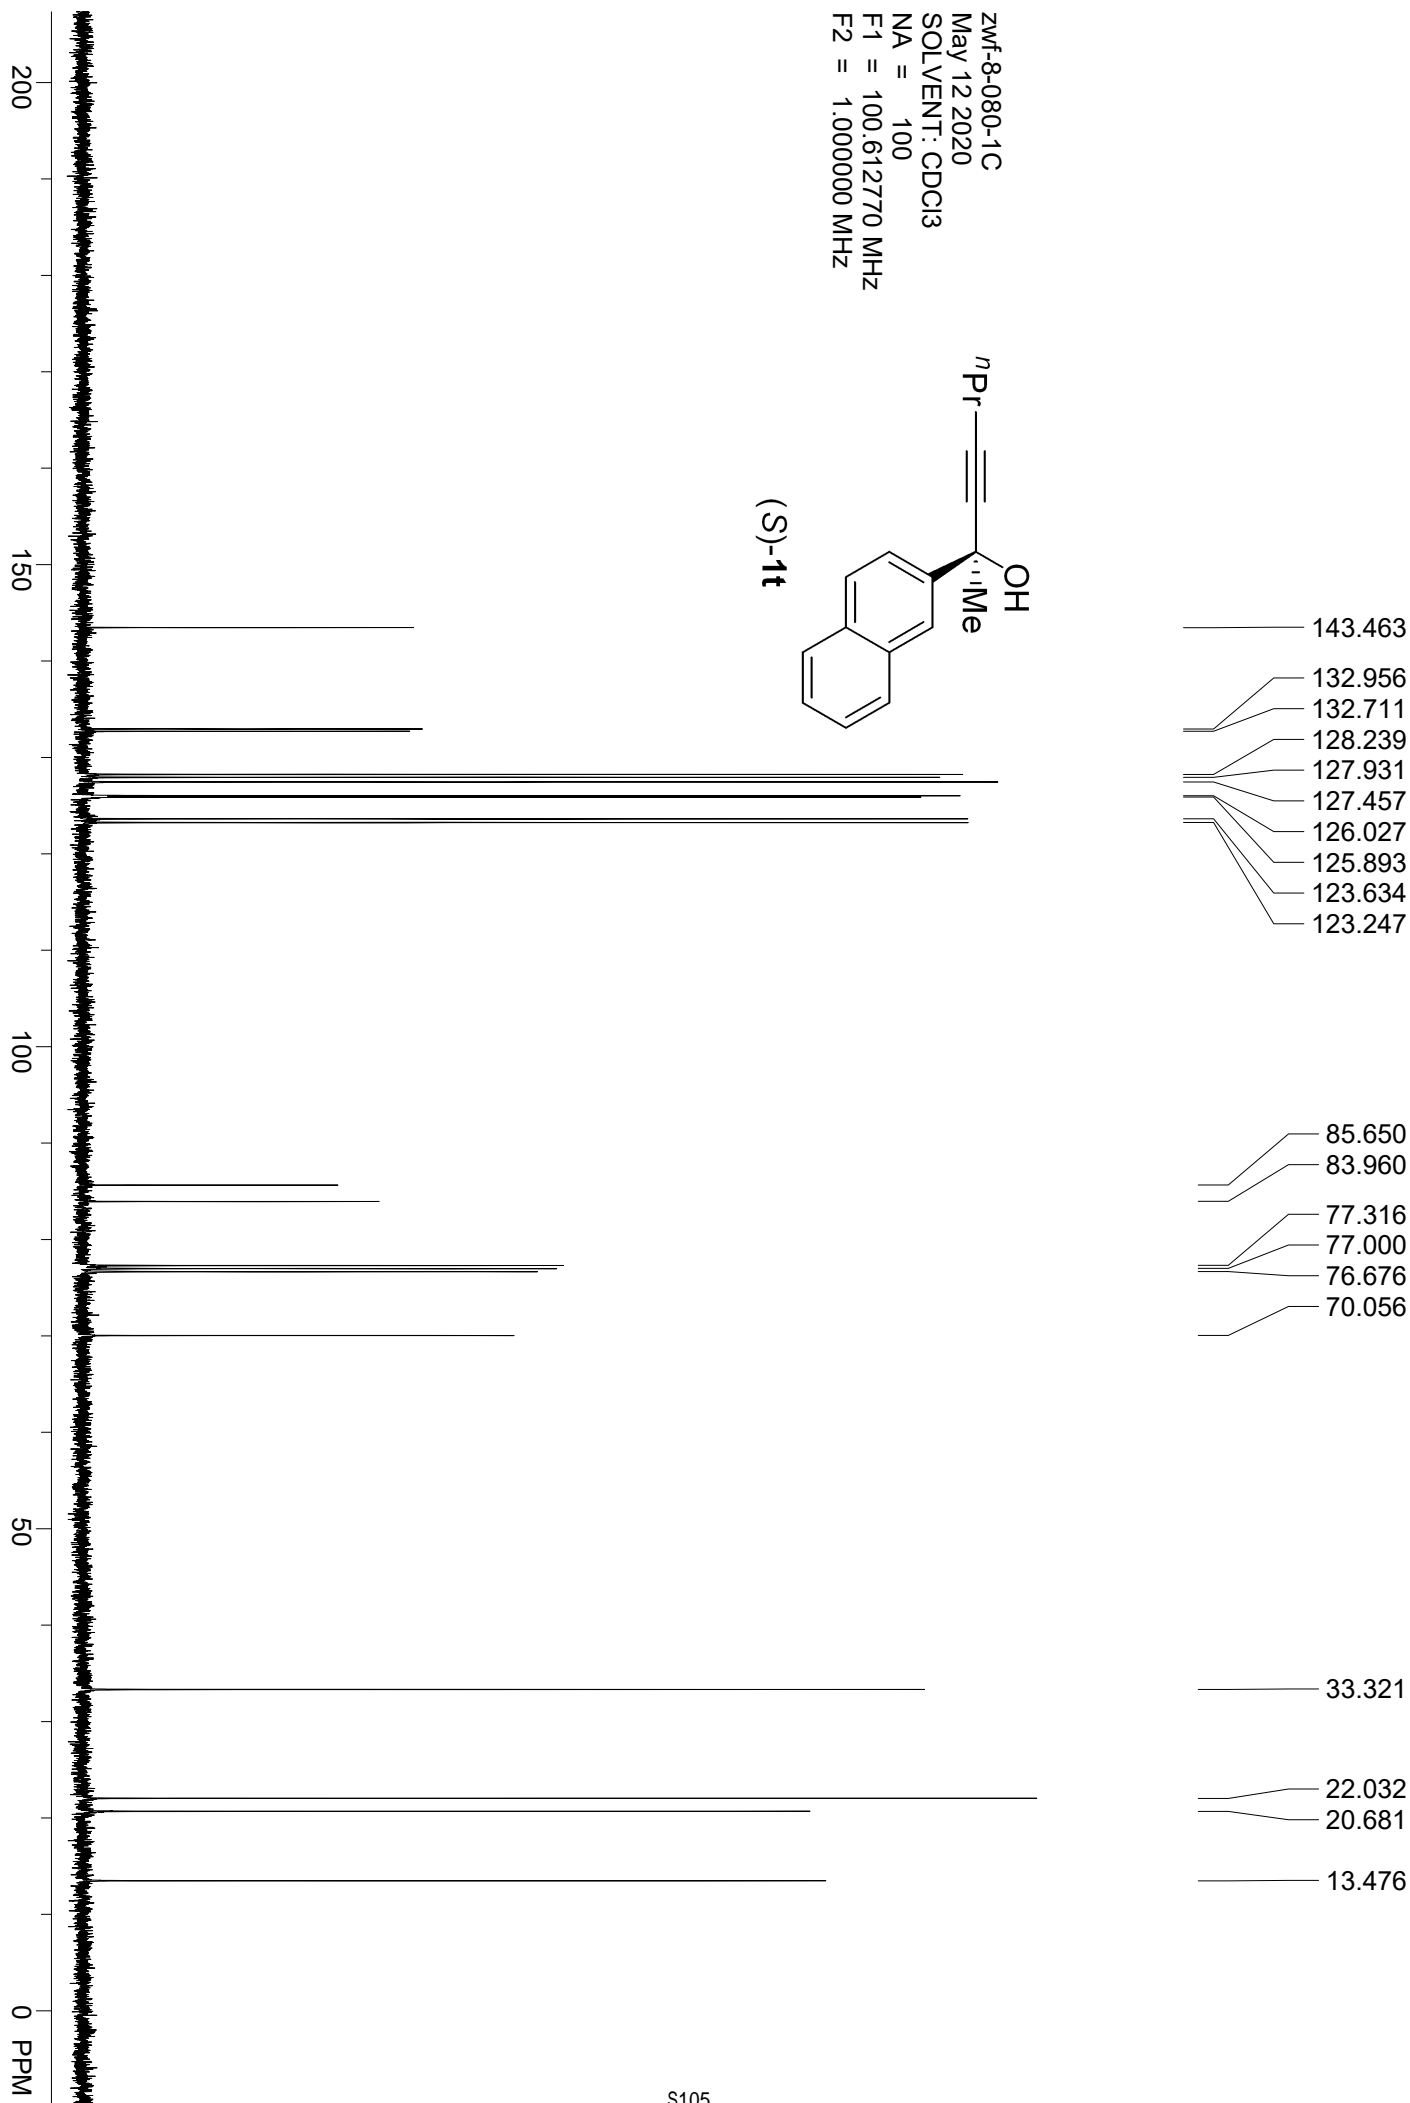

# Area Percent Report



Agilent Technologies

sample zwf-8-080-1-AS-H-98-2-1.0-214

Data file: C:\Users\Public\Documents\ChemStation\1\Data\linj 2020-05-12 10-02-00\011-P1-C1-zwf-8-080-1.D

## Acquisition Data:

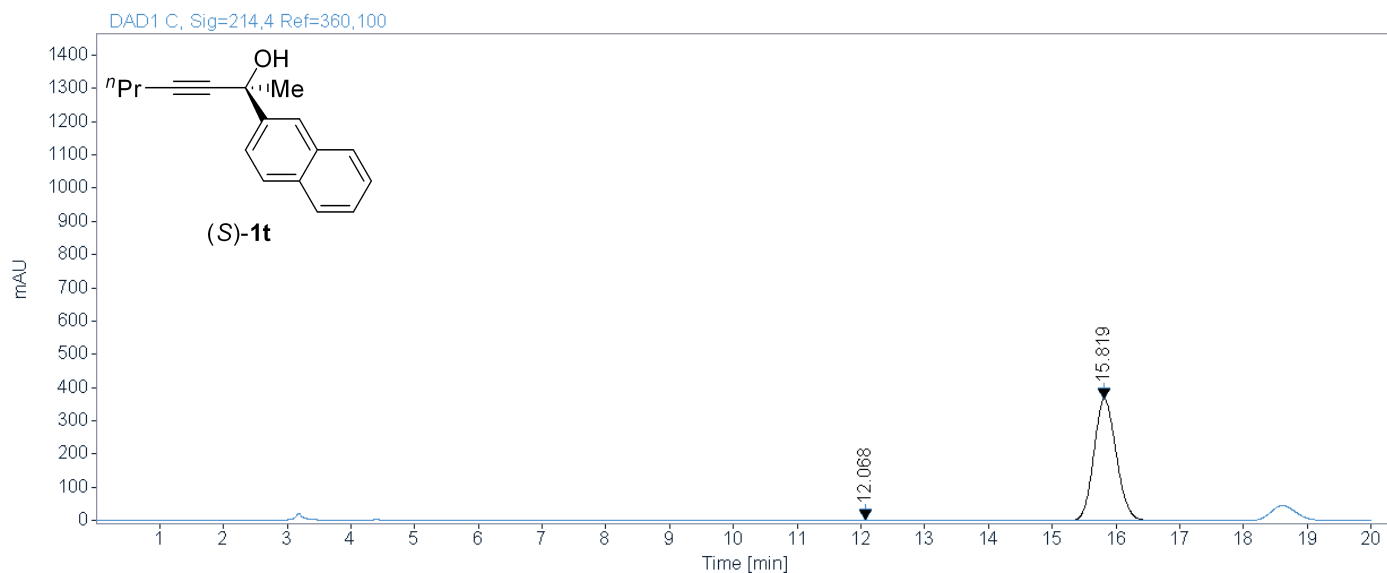

Signal: DAD1 C, Sig=214,4 Ref=360,100

| RT [min] | Width [min] | Height   | Area      | Area%    |
|----------|-------------|----------|-----------|----------|
| 12.068   | 0.2859      | 2.3332   | 43.1758   | 0.4808   |
| 15.819   | 0.3806      | 366.2718 | 8935.9346 | 99.5192  |
|          |             | Sum      | 8979.1104 | 100.0000 |

# Area Percent Report



Agilent Technologies

sample zwf-8-080-1-rac-AS-H-98-2-1.0-214

Data file: C:\Users\Public\Documents\ChemStation\1\Data\linj 2020-05-12 10-02-00\010-P1-C2-zwf-8-080-1-rac.D

## Acquisition Data:

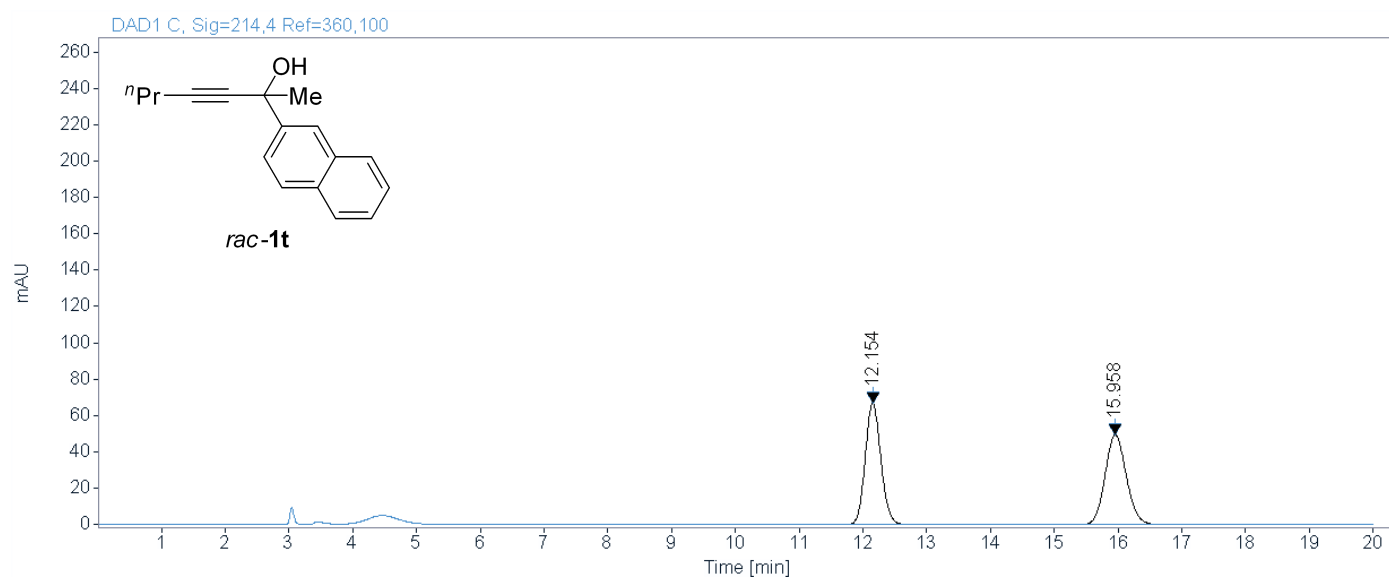

Signal: DAD1 C, Sig=214,4 Ref=360,100

| RT [min] | Width [min] | Height  | Area      | Area%    |
|----------|-------------|---------|-----------|----------|
| 12.154   | 0.2625      | 67.0573 | 1140.9266 | 49.9645  |
| 15.958   | 0.3597      | 49.4305 | 1142.5488 | 50.0355  |
|          | Sum         |         | 2283.4755 | 100.0000 |

7.628  
7.610  
7.362  
7.344  
7.324  
7.287  
7.270  
7.256

2.315  
2.311  
2.297  
2.280  
1.936  
1.903  
1.873  
1.861  
1.846  
1.817  
1.805  
1.783  
1.589  
1.572  
1.551  
1.534  
1.474  
1.456  
1.436  
1.417  
1.364  
1.347  
1.328  
1.315  
1.296  
0.951  
0.933  
0.915  
0.899  
0.880  
0.861  
-0.000

Zwf-8-162-1-H  
Jul 02 2020  
SOLVENT: cdcl3  
NA = 4  
F1 = 399.749542 MHz  
F2 = 100.526031 MHz

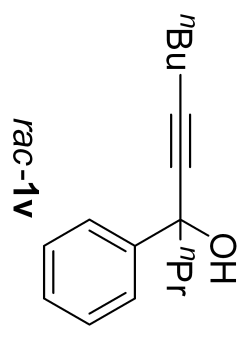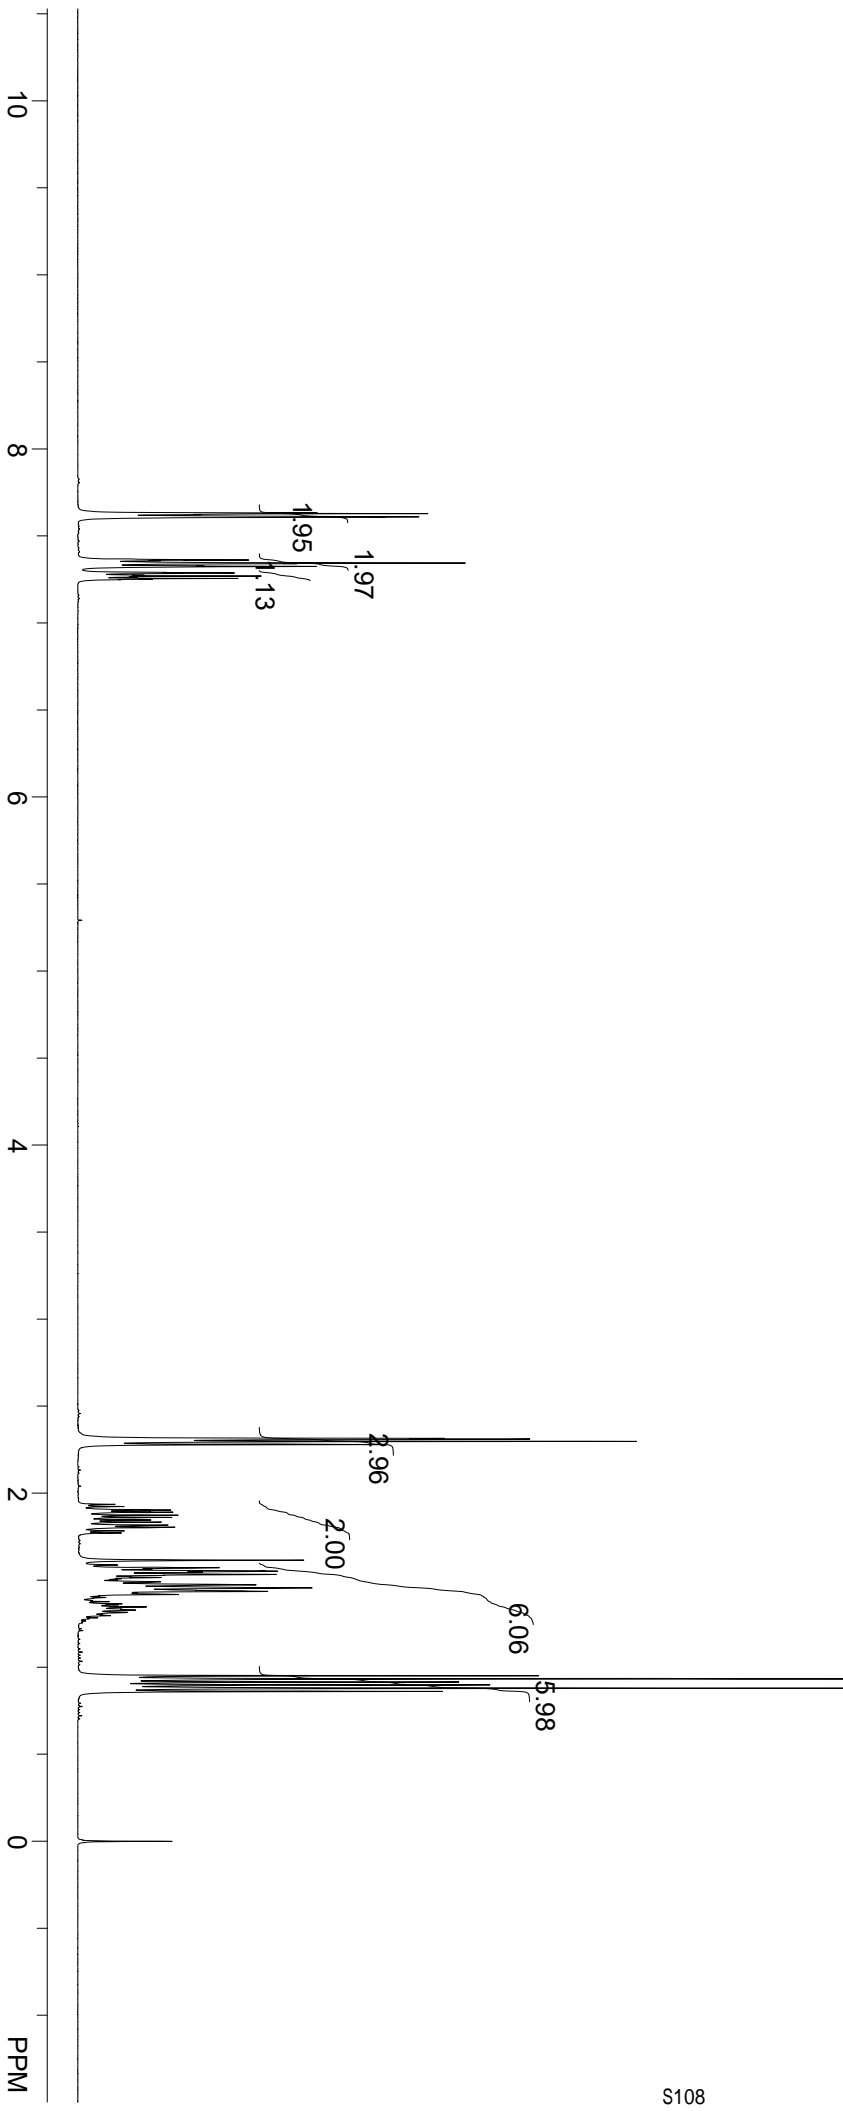

ZWF-8-162-1-C  
Jul 02 2020  
SOLVENT: cdcl3  
NA = 80  
F1 = 100.527557 MHz  
F2 = 399.749146 MHz

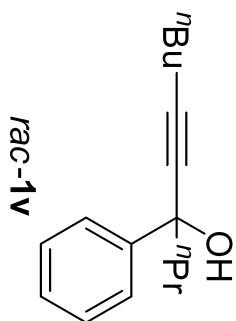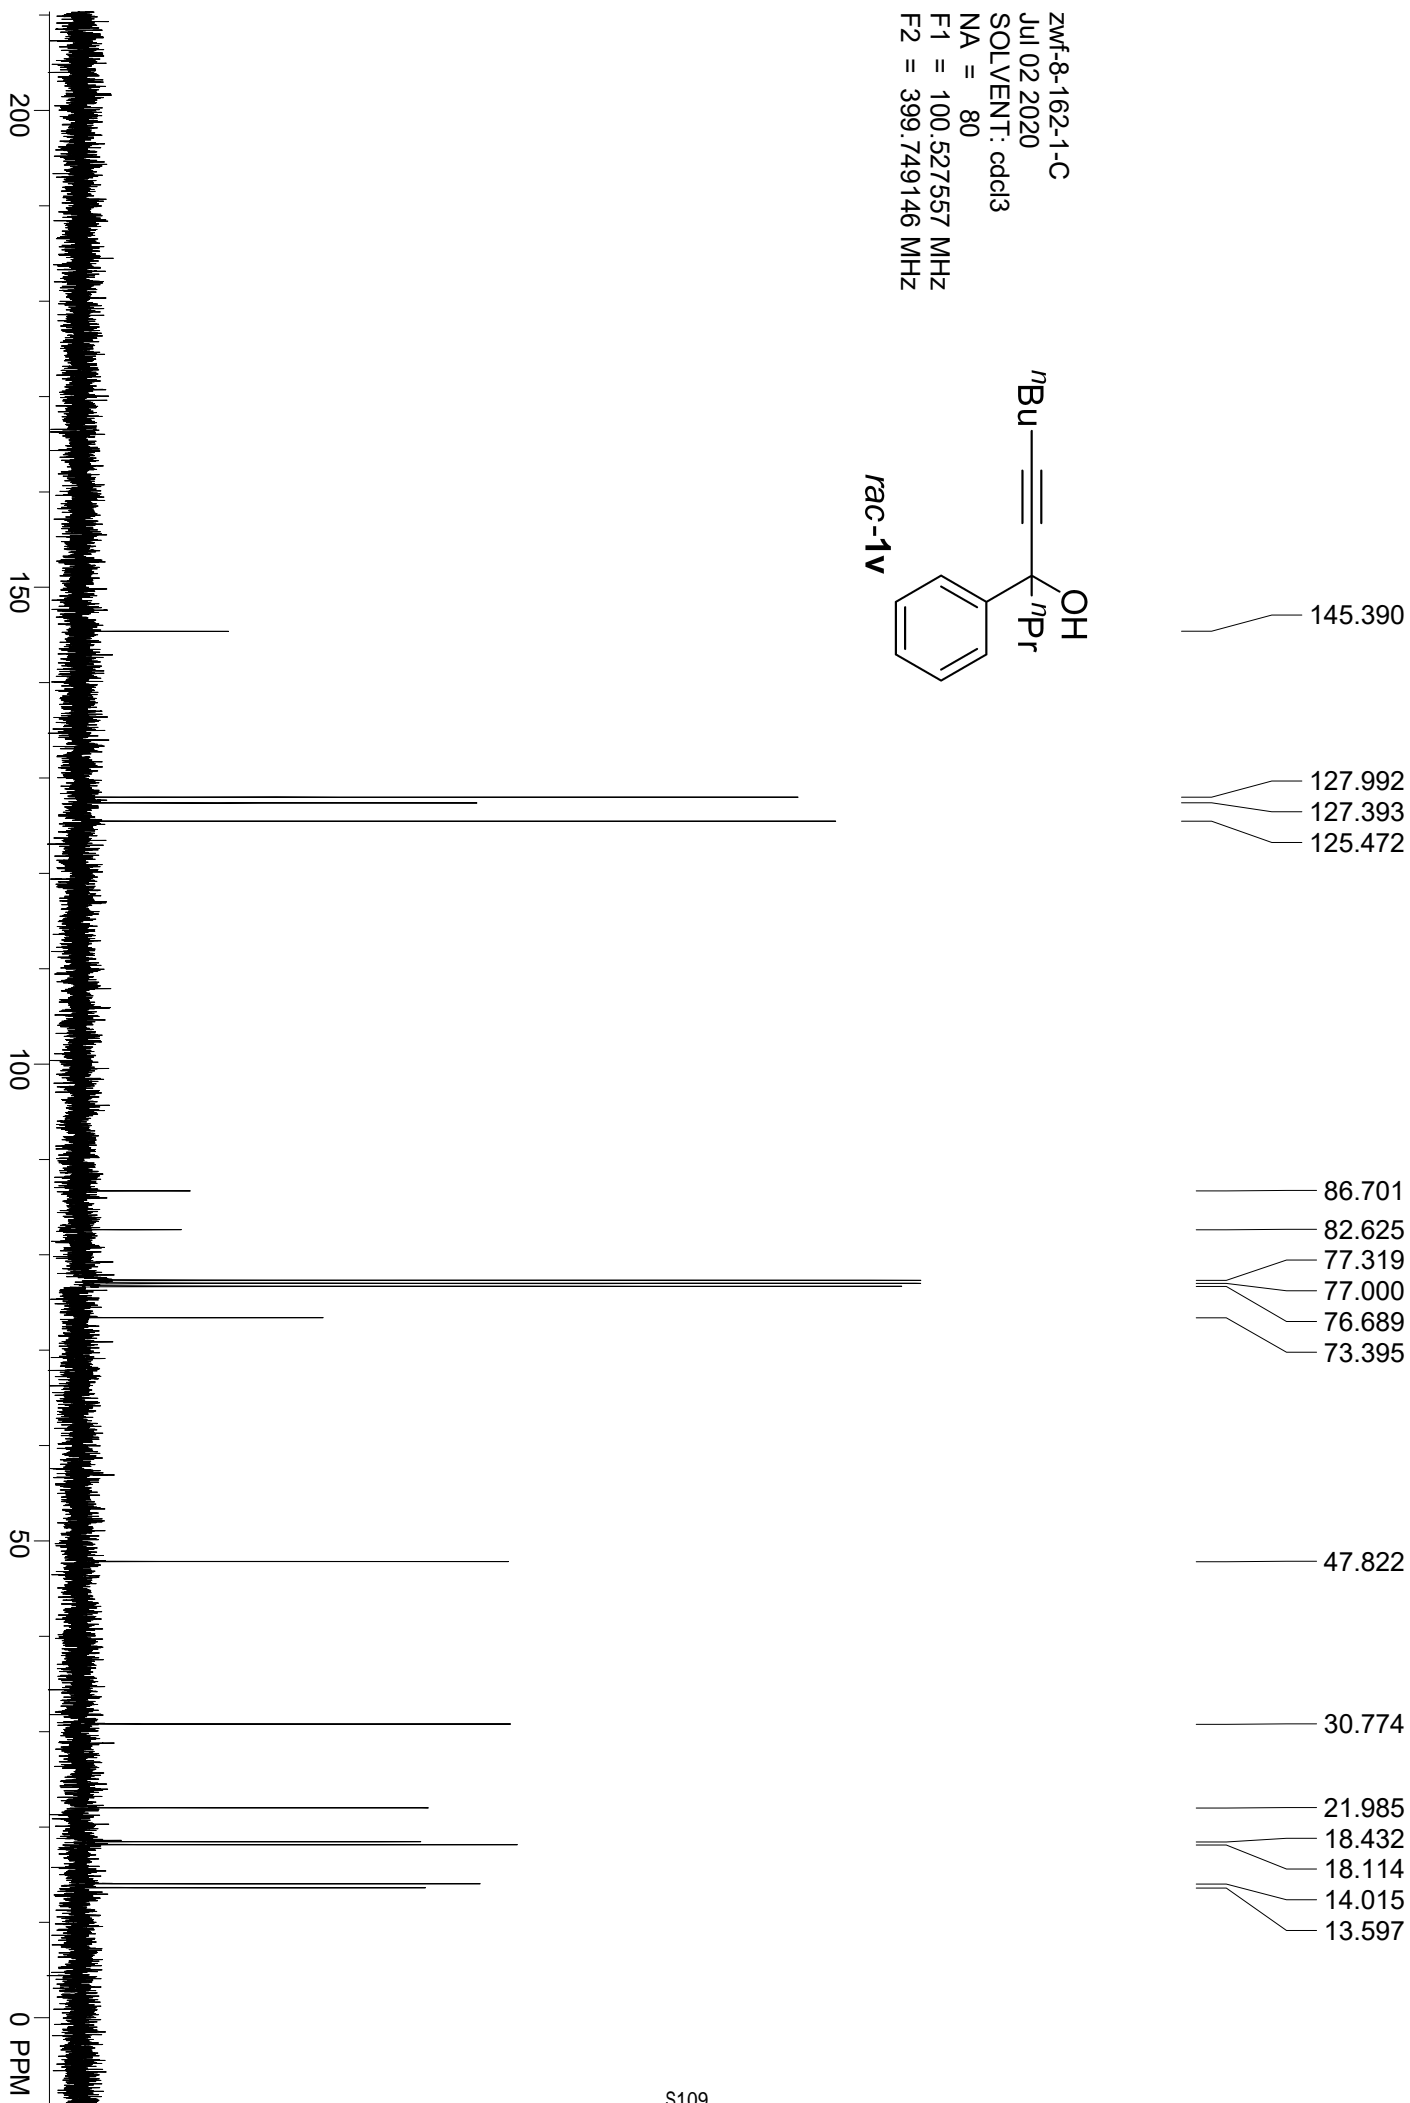

# Area Percent Report

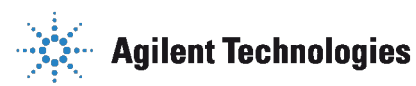

sample zwf-8-162-1-AS-H-98-2-1.0-214

Data file: C:\Users\Public\Documents\ChemStation\1\Data\wgl 2020-07-01 08-16-22\039-P1-C1-zwf-8-162-1.D

## Acquisition Data:

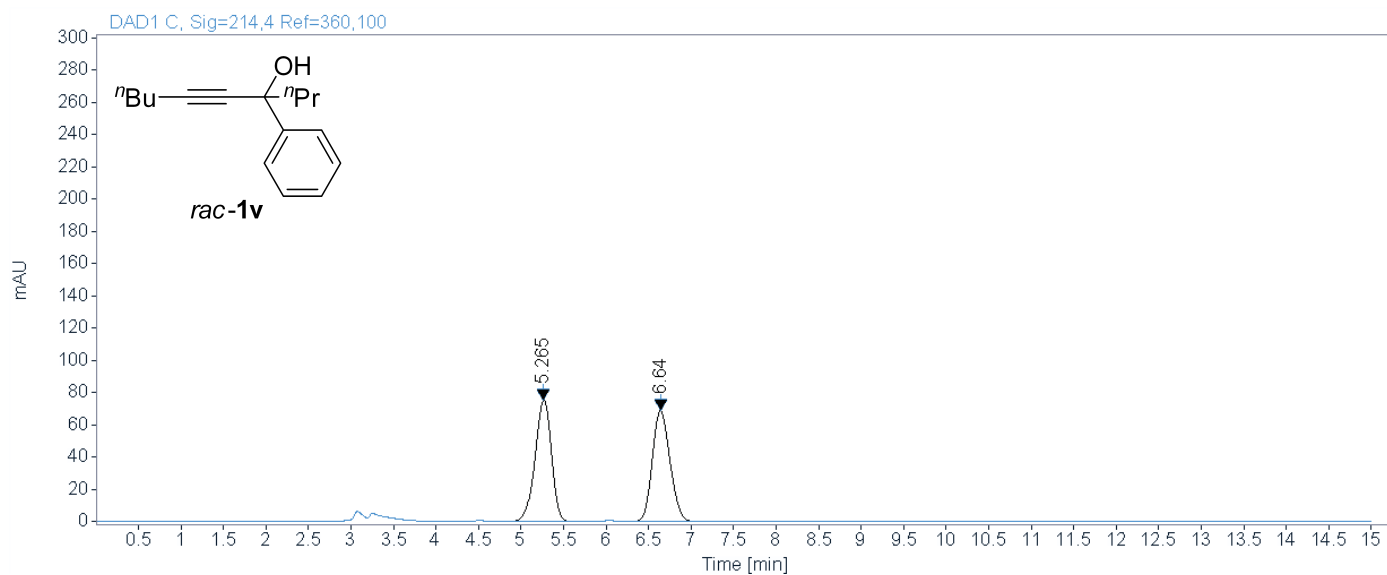

Signal: DAD1 C, Sig=214,4 Ref=360,100

| RT [min] | Width [min] | Height  | Area      | Area%    |
|----------|-------------|---------|-----------|----------|
| 5.265    | 0.2082      | 75.4529 | 1010.2364 | 50.3166  |
| 6.640    | 0.2248      | 68.9570 | 997.5244  | 49.6834  |
|          | Sum         |         | 2007.7608 | 100.0000 |

# Area Percent Report



Agilent Technologies

sample zwf-8-162-1-rac-AS-H-98-2-1.0-214

Data file: C:\Users\Public\Documents\ChemStation\1\Data\wgl 2020-07-01 08-16-22\040-P1-C2-zwf-8-162-1-rac.D

## Acquisition Data:

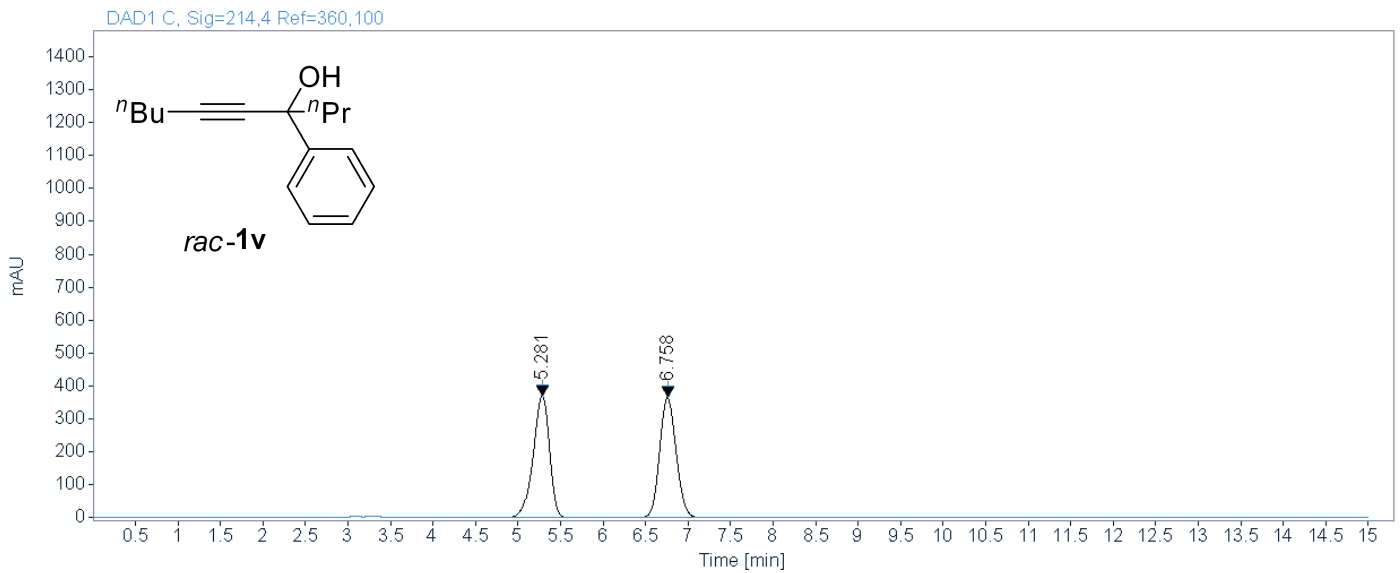

Signal: DAD1 C, Sig=214,4 Ref=360,100

| RT [min] | Width [min] | Height   | Area      | Area%    |
|----------|-------------|----------|-----------|----------|
| 5.281    | 0.2050      | 369.4388 | 4906.7617 | 49.9637  |
| 6.758    | 0.2118      | 363.2932 | 4913.8936 | 50.0363  |
|          |             | Sum      | 9820.6553 | 100.0000 |

ZWF-6-030-1  
May 04 2019  
SOLVENT: CDCl3  
NA = 4  
F1 = 400.130005 MHz  
F2 = 1.000000 MHz

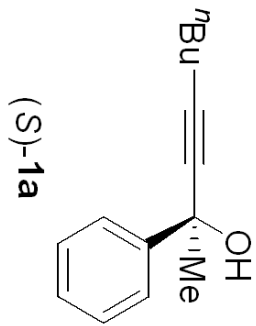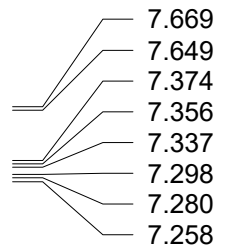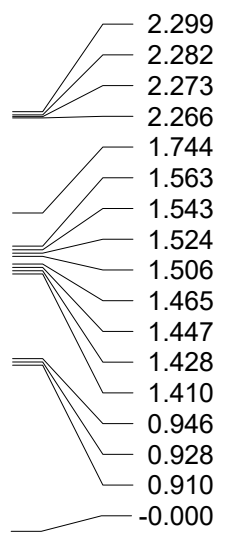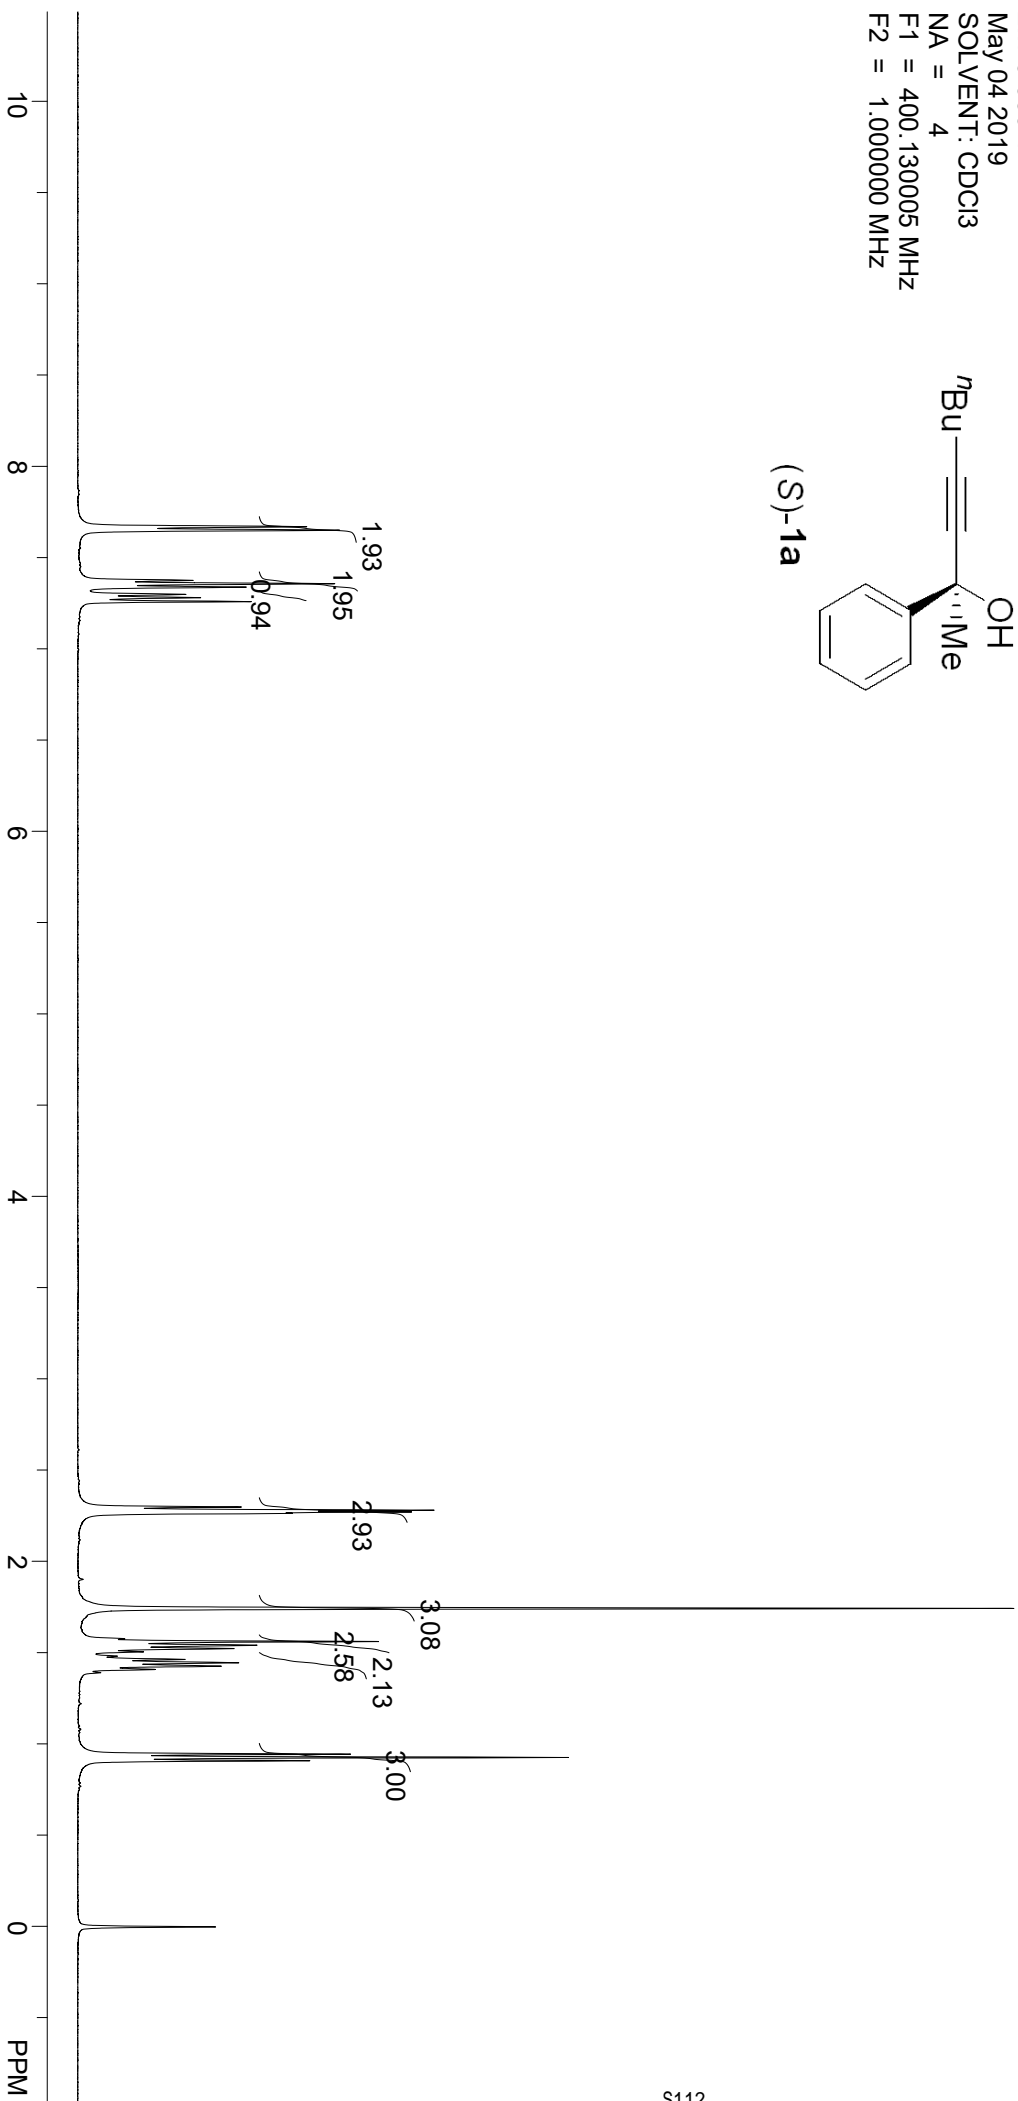



Zwf-6-030-1  
May 04 2019  
SOLVENT: CDCl3  
NA = 100  
F1 = 100.623833 MHz  
F2 = 1.000000 MHz

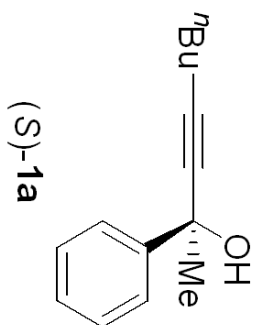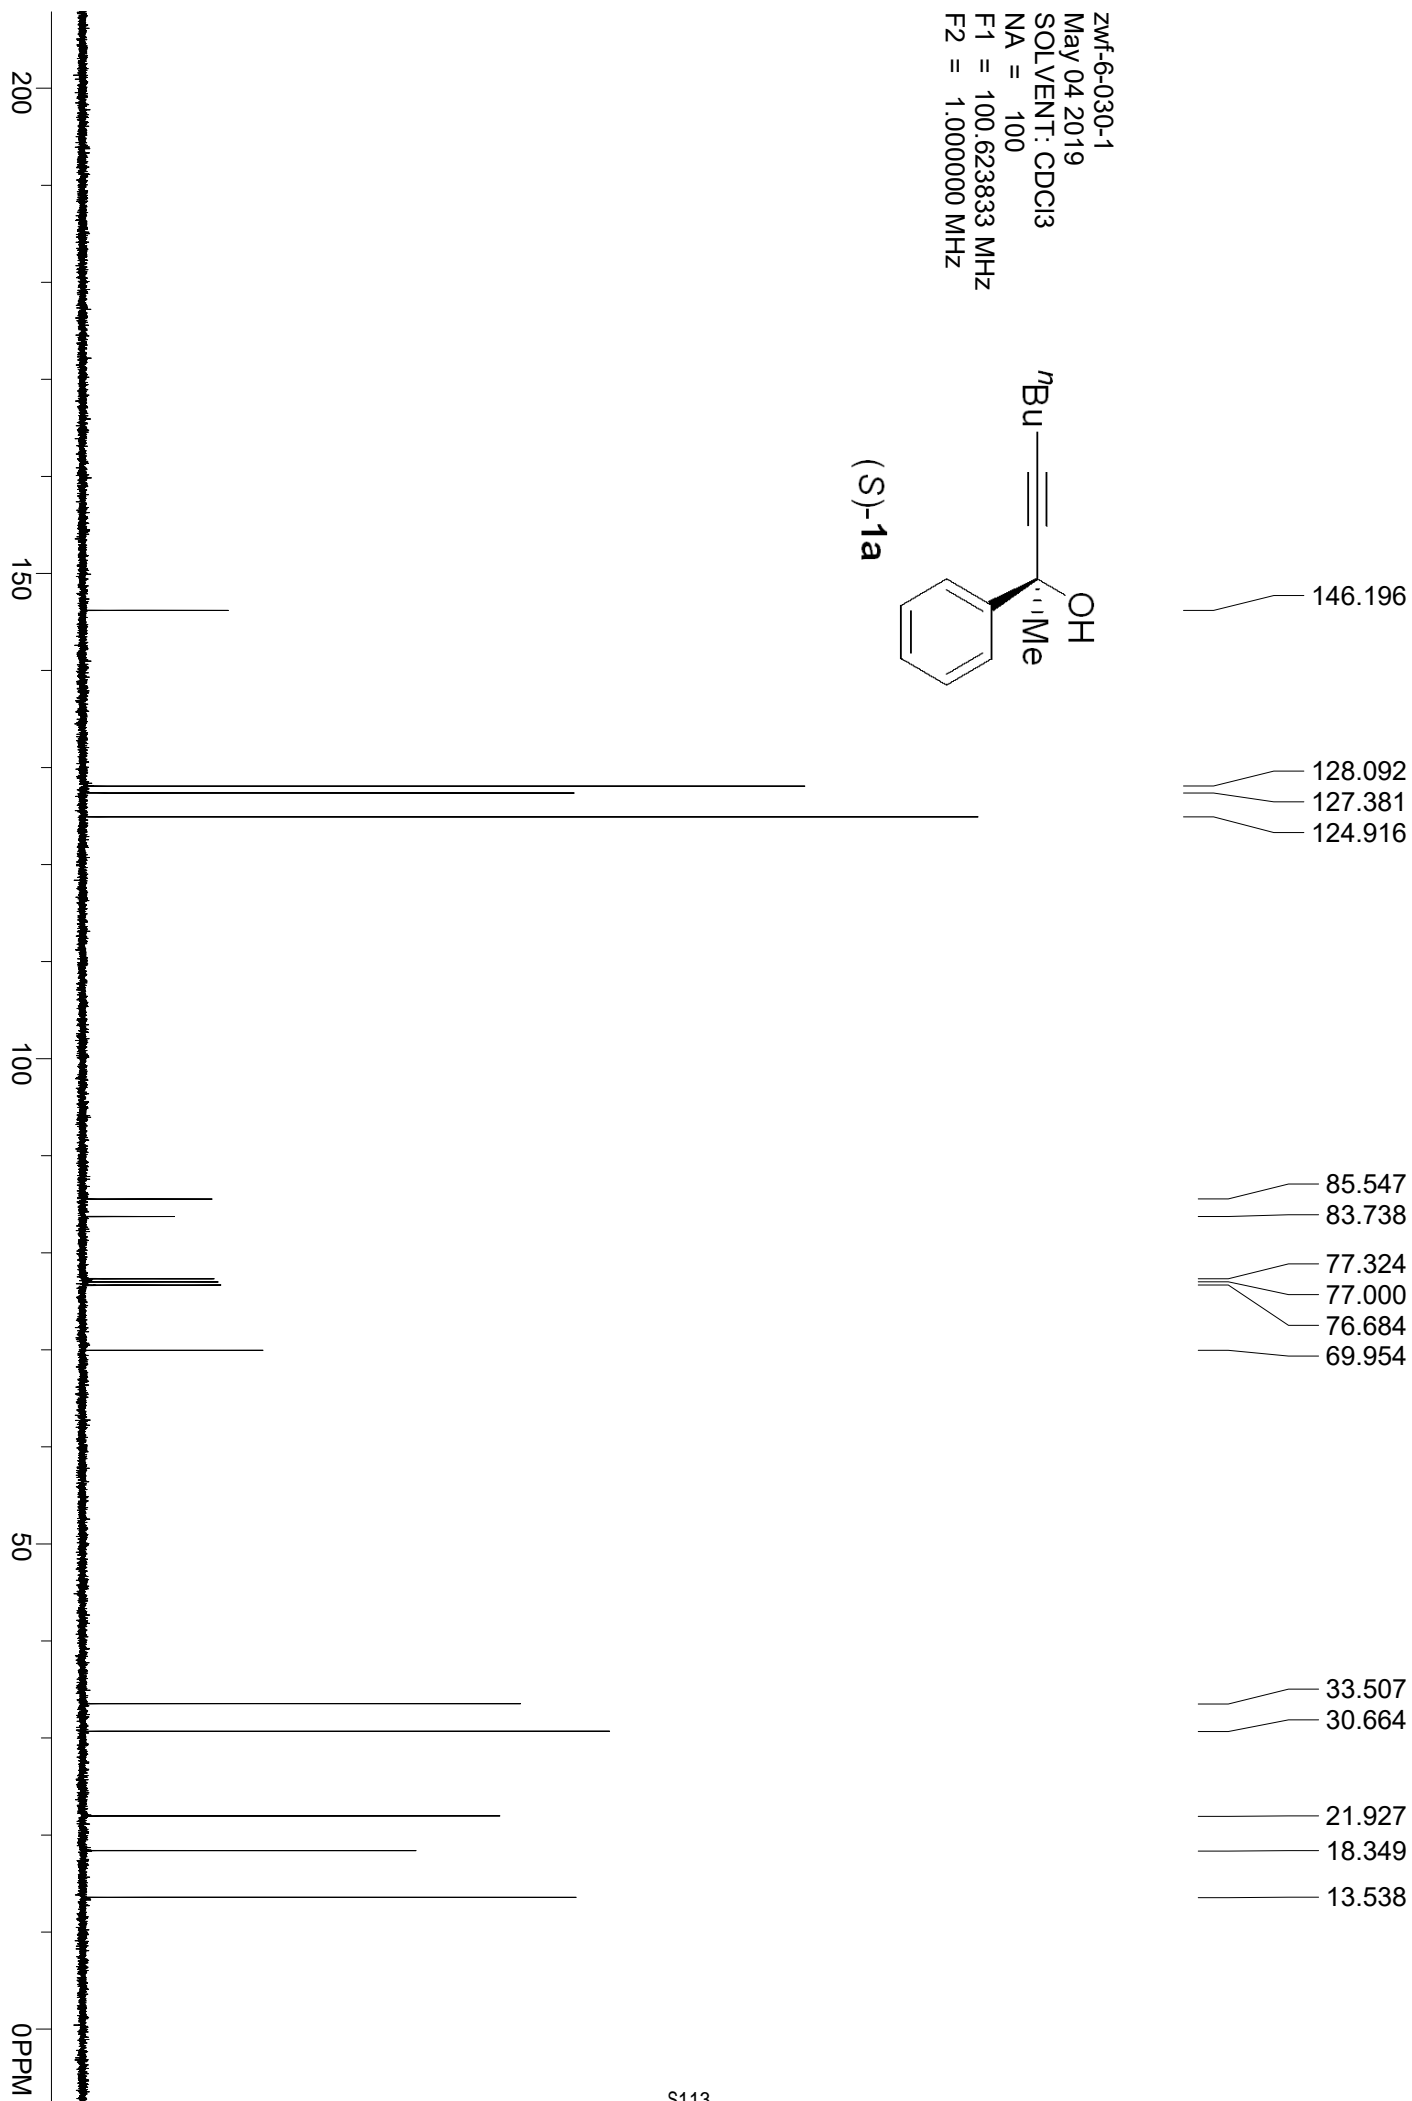

# Area Percent Report



Agilent Technologies

sample zwf-6-030-1-AS-H-98-2-1.0-214

Data file: C:\Users\Public\Documents\ChemStation\1\Data\zwf-allenioc acid\_LC 2019-05-05 08-23-41\004-P1-C1-zwf-6-030-1.D

Acquisition Data: 5/5/2019 9:12:35 AM

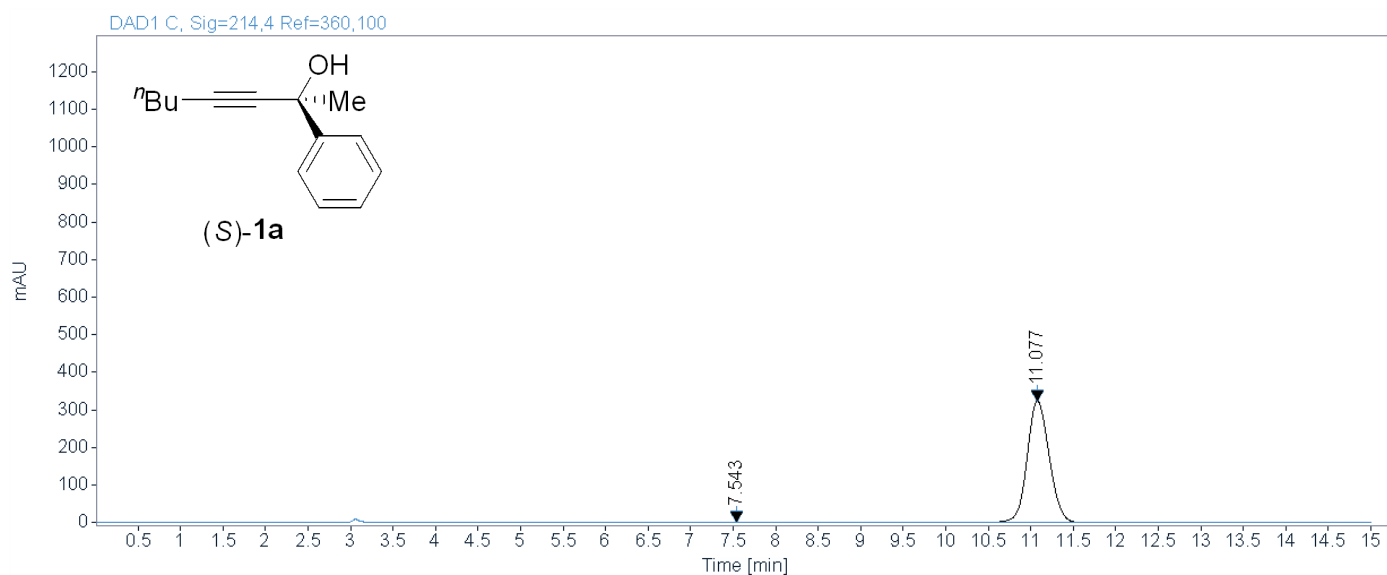

Signal: DAD1 C, Sig=214,4 Ref=360,100

| RT [min] | Width [min] | Height   | Area      | Area%    |
|----------|-------------|----------|-----------|----------|
| 7.543    | 0.2203      | 0.4801   | 6.3457    | 0.1084   |
| 11.077   | 0.2805      | 324.1383 | 5847.9878 | 99.8916  |
|          |             | Sum      | 5854.3335 | 100.0000 |

# Area Percent Report



Agilent Technologies

sample zwf-6-030-1-rac-AS-H-98-2-1.0-214

Data file: C:\Users\Public\Documents\ChemStation\1\Data\zwf-allenioc acid\_LC 2019-05-05 08-23-41\005-P1-C2-zwf-6-030-1-rac.D

Acquisition Data: 5/5/2019 9:28:33 AM

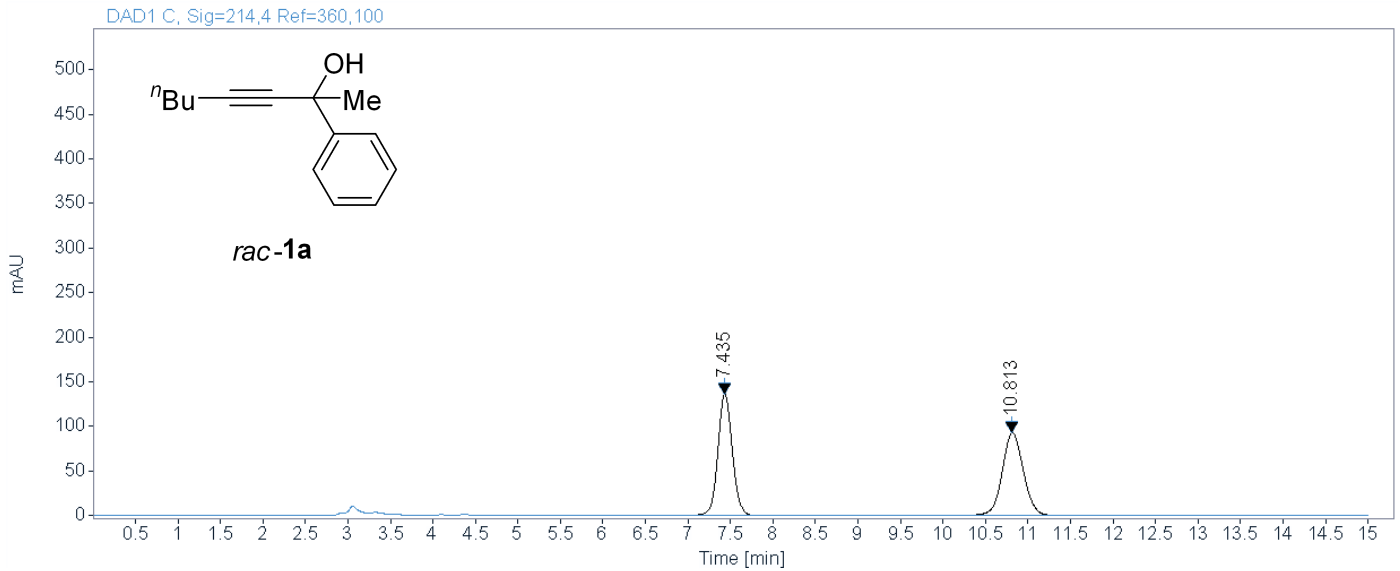

Signal: DAD1 C, Sig=214,4 Ref=360,100

| RT [min] | Width [min] | Height   | Area      | Area%    |
|----------|-------------|----------|-----------|----------|
| 7.435    | 0.1807      | 136.3681 | 1598.3152 | 49.9177  |
| 10.813   | 0.2677      | 92.7393  | 1603.5850 | 50.0823  |
|          |             | Sum      | 3201.9001 | 100.0000 |

7.664  
7.645  
7.368  
7.350  
7.331  
7.291  
7.274  
7.252

2.336  
2.294  
2.277  
2.259  
1.739  
1.574  
1.557  
1.539  
1.520  
1.502  
1.480  
1.462  
1.444  
1.425  
1.407  
1.389  
0.943  
0.925  
0.907  
-0.000

zmf-5-047-1  
Jan 05 2019  
SOLVENT: CDCl3  
NA = 4  
F1 = 400.130005 MHz  
F2 = 1.000000 MHz

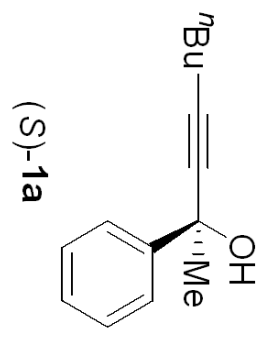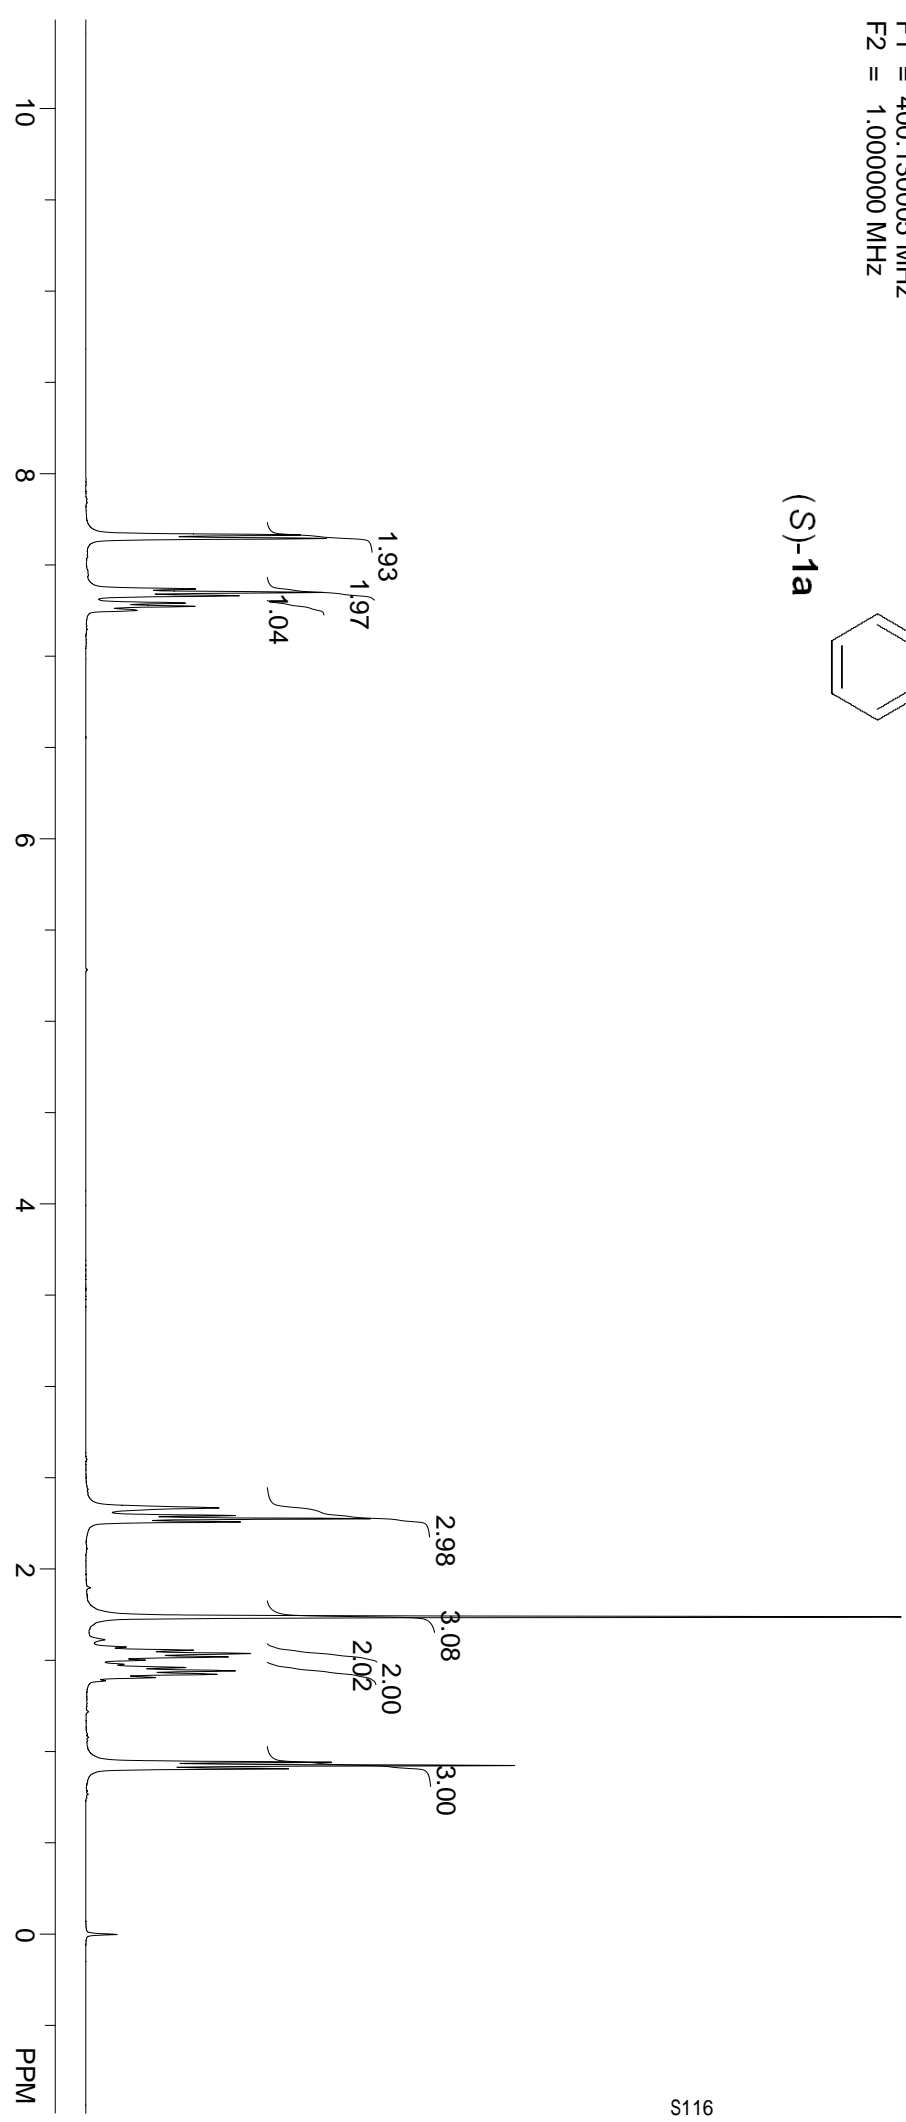

zwf-5-047-1  
Jan 05 2019  
SOLVENT: CDCl3  
NA = 100  
F1 = 100.612770 MHz  
F2 = 1.000000 MHz

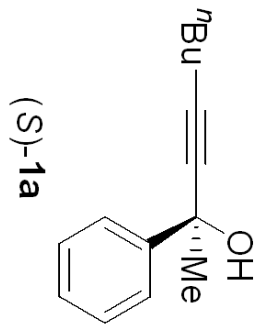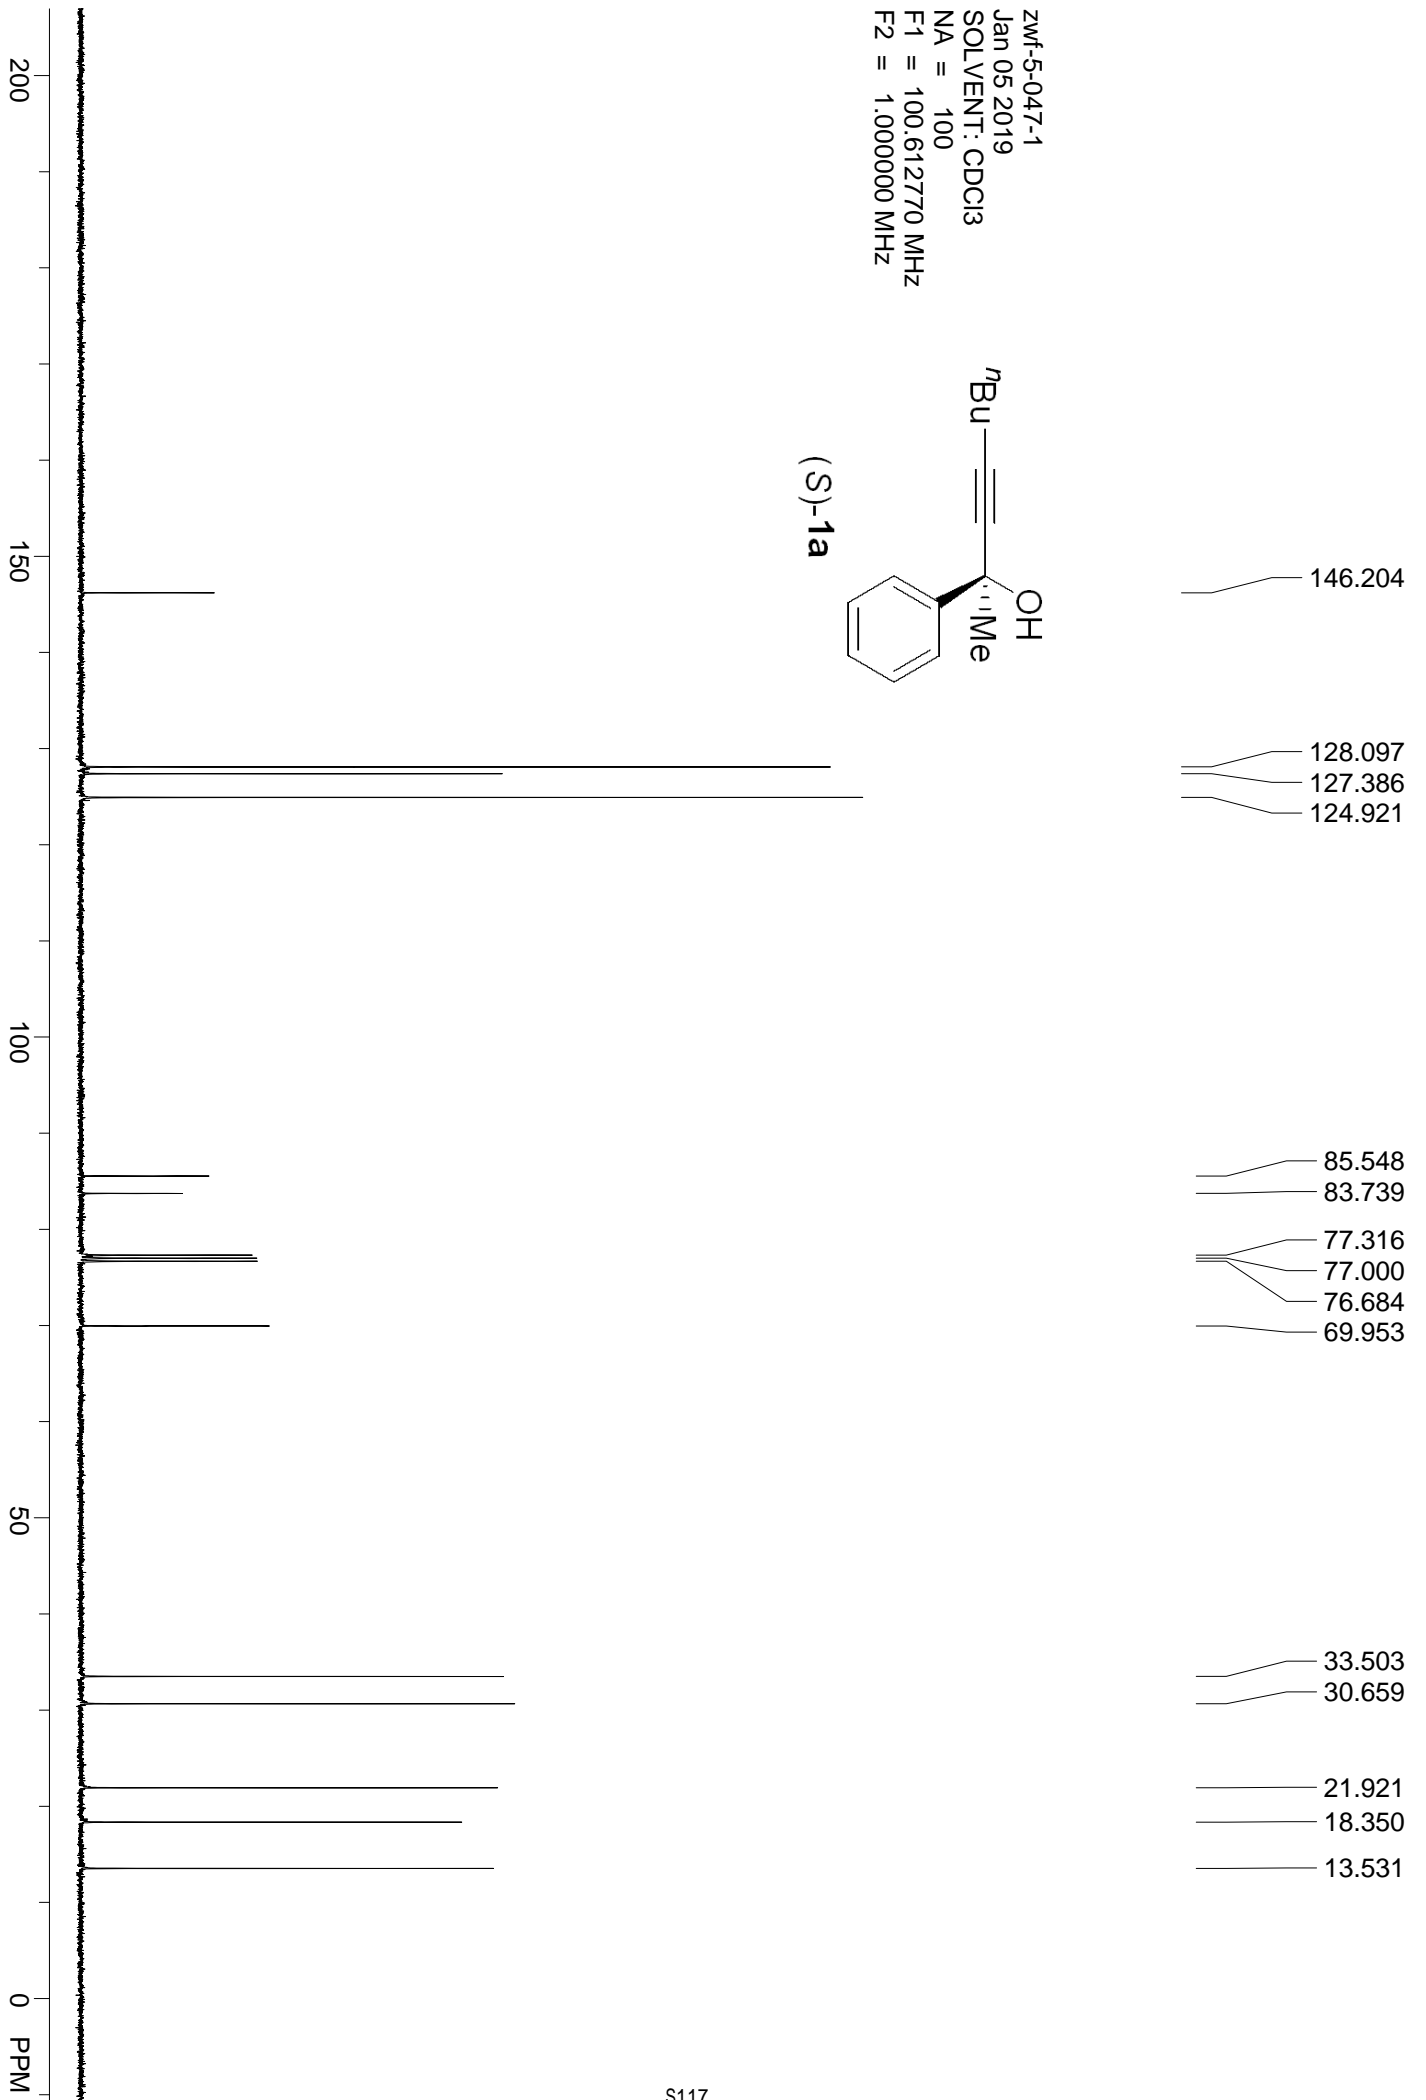

# Area Percent Report

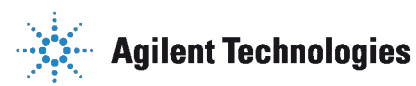

Sample name: zwf-5-047-1-AS-H-98-2-1.0-214

Data file: C:\Users\Public\Documents\ChemStation\1\Data\zwf-allenioc acid\_LC 2019-01-06 09-25-17\003-P1-C1-zwf-5-047-1.D

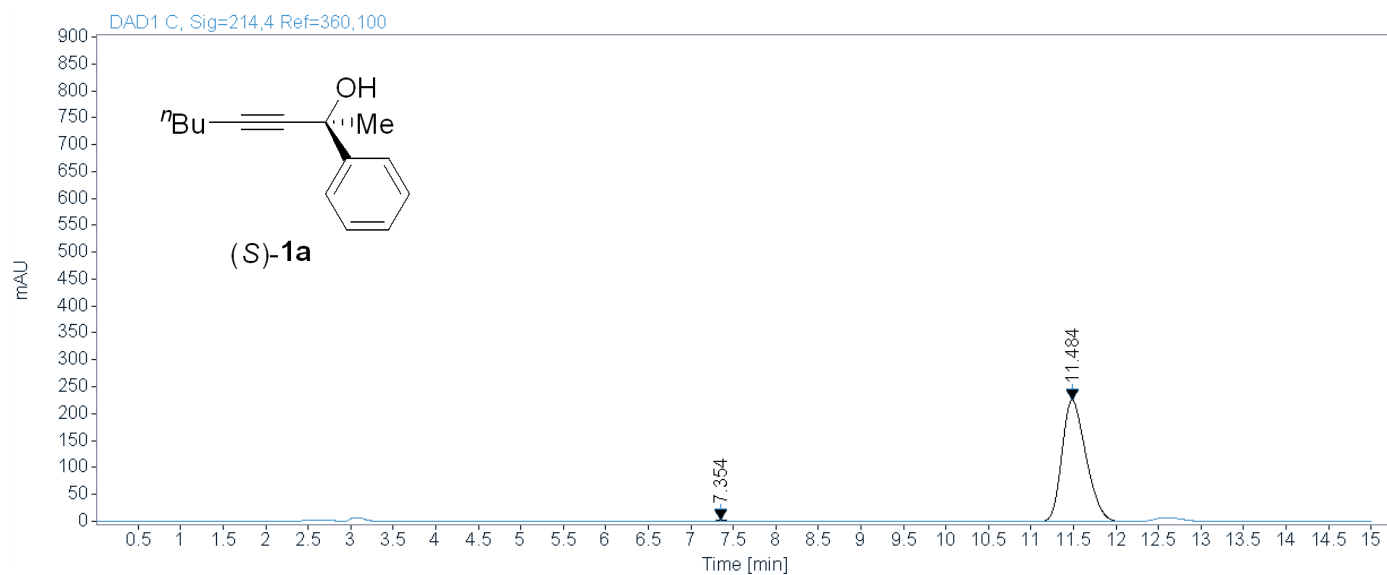

Signal: DAD1 C, Sig=214,4 Ref=360,100

| RT [min] | Width [min] | Height   | Area      | Area%    |
|----------|-------------|----------|-----------|----------|
| 7.354    | 0.1741      | 2.0668   | 23.7616   | 0.5286   |
| 11.484   | 0.3066      | 226.2634 | 4471.8086 | 99.4714  |
| Sum      |             |          | 4495.5702 | 100.0000 |

# Area Percent Report

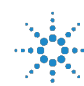

Agilent Technologies

Sample name: zwf-5-047-1-rac-AS-H-98-2-1.0-214

Data file: C:\Users\Public\Documents\ChemStation\1\Data\zwf-allenioc acid\_LC 2019-01-06 09-25-17\004-P1-C2-zwf-5-047-1-rac.D

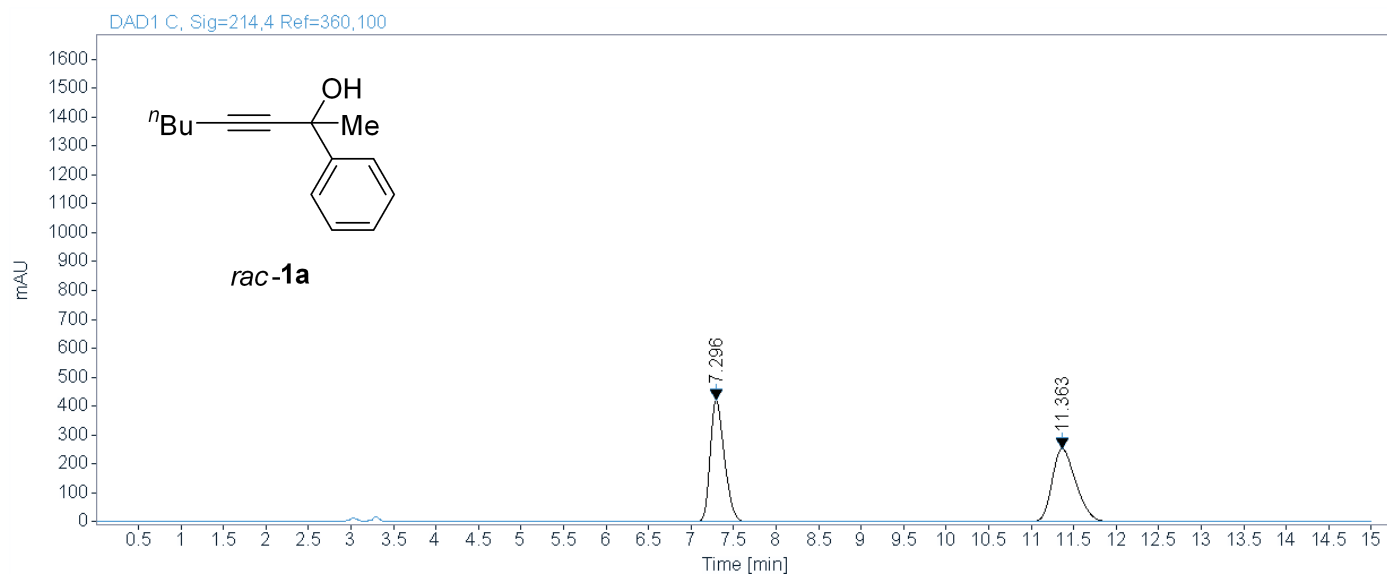

Signal: DAD1 C, Sig=214,4 Ref=360,100

| RT [min] | Width [min] | Height   | Area      | Area%    |
|----------|-------------|----------|-----------|----------|
| 7.296    | 0.1750      | 421.8644 | 4880.0942 | 49.8696  |
| 11.363   | 0.3006      | 252.5462 | 4905.6206 | 50.1304  |
| Sum      |             |          | 9785.7148 | 100.0000 |

wf-1-19-1-H  
Nov 28 2019  
SOLVENT: CDCl3  
NA = 4  
F1 = 400.130005 MHz  
F2 = 1.000000 MHz

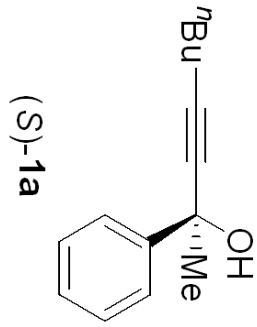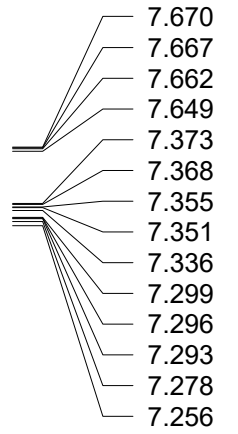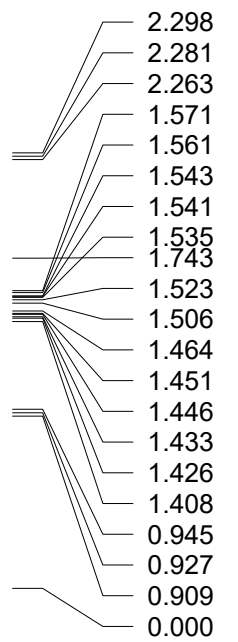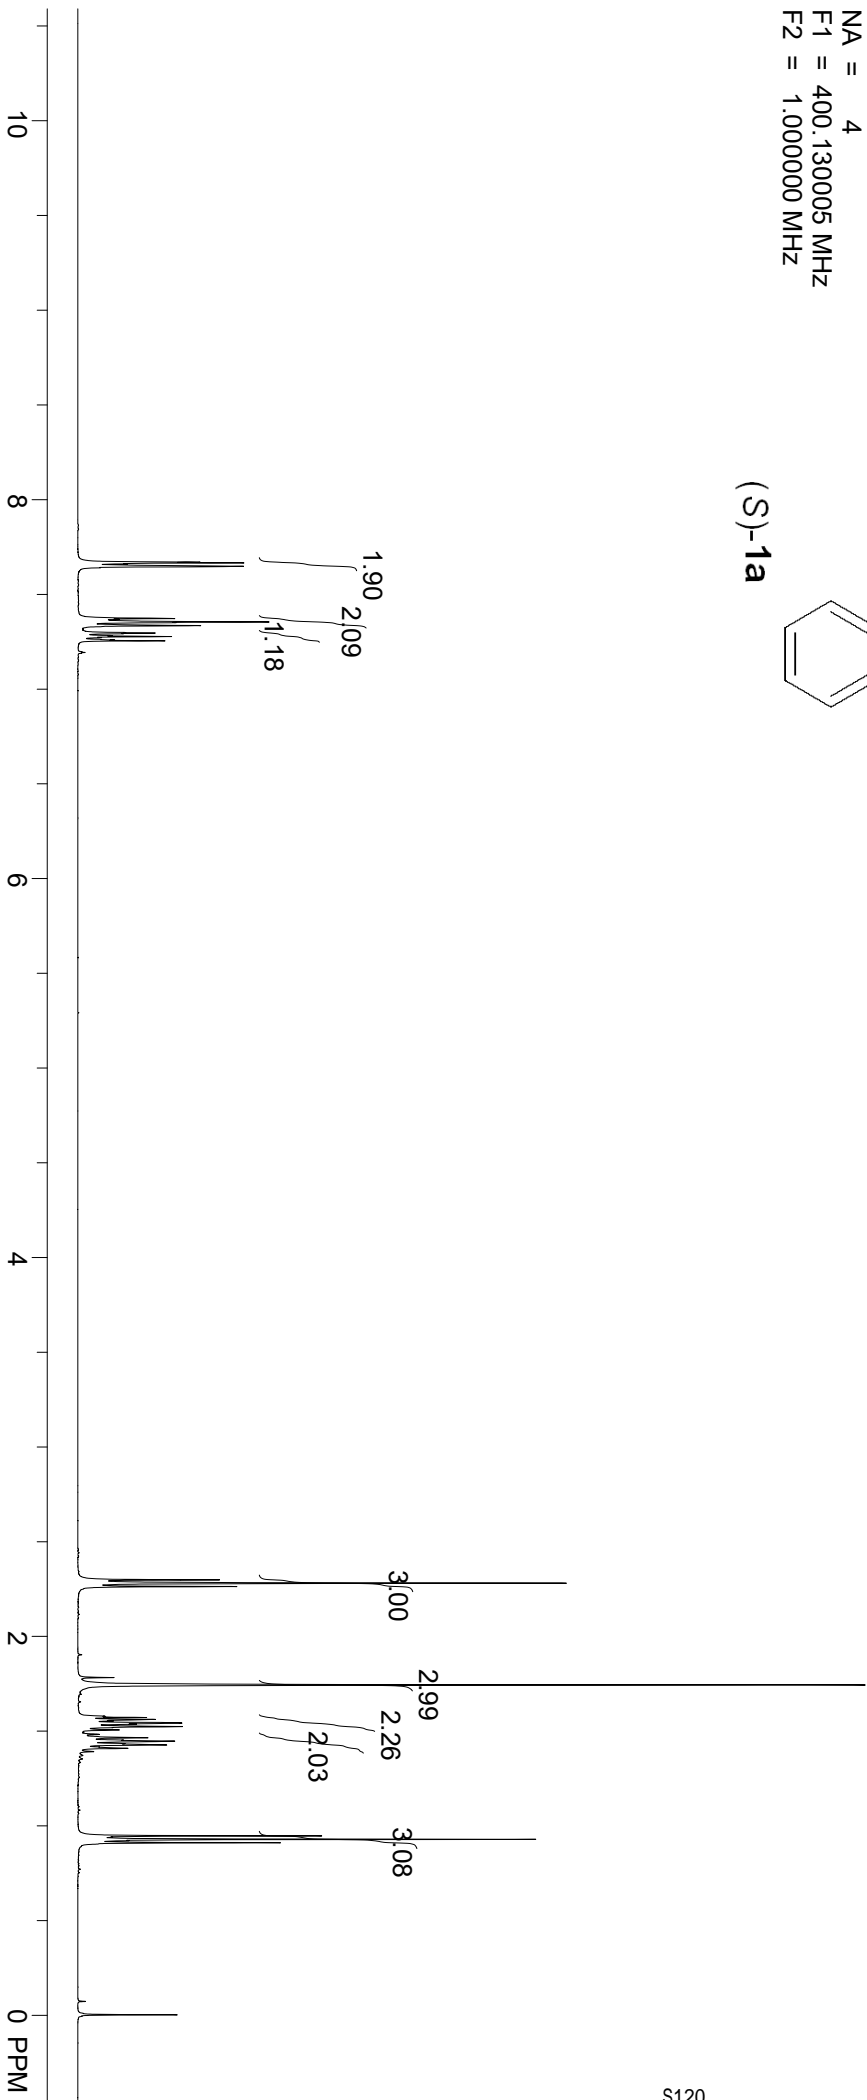



wj-1-19-1-C  
Nov 28 2019  
SOLVENT: CDCl3  
NA = 100  
F1 = 100.612770 MHz  
F2 = 1.000000 MHz

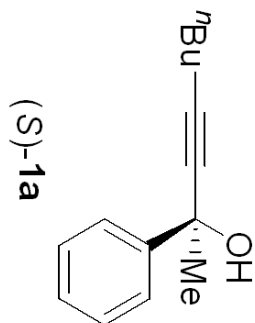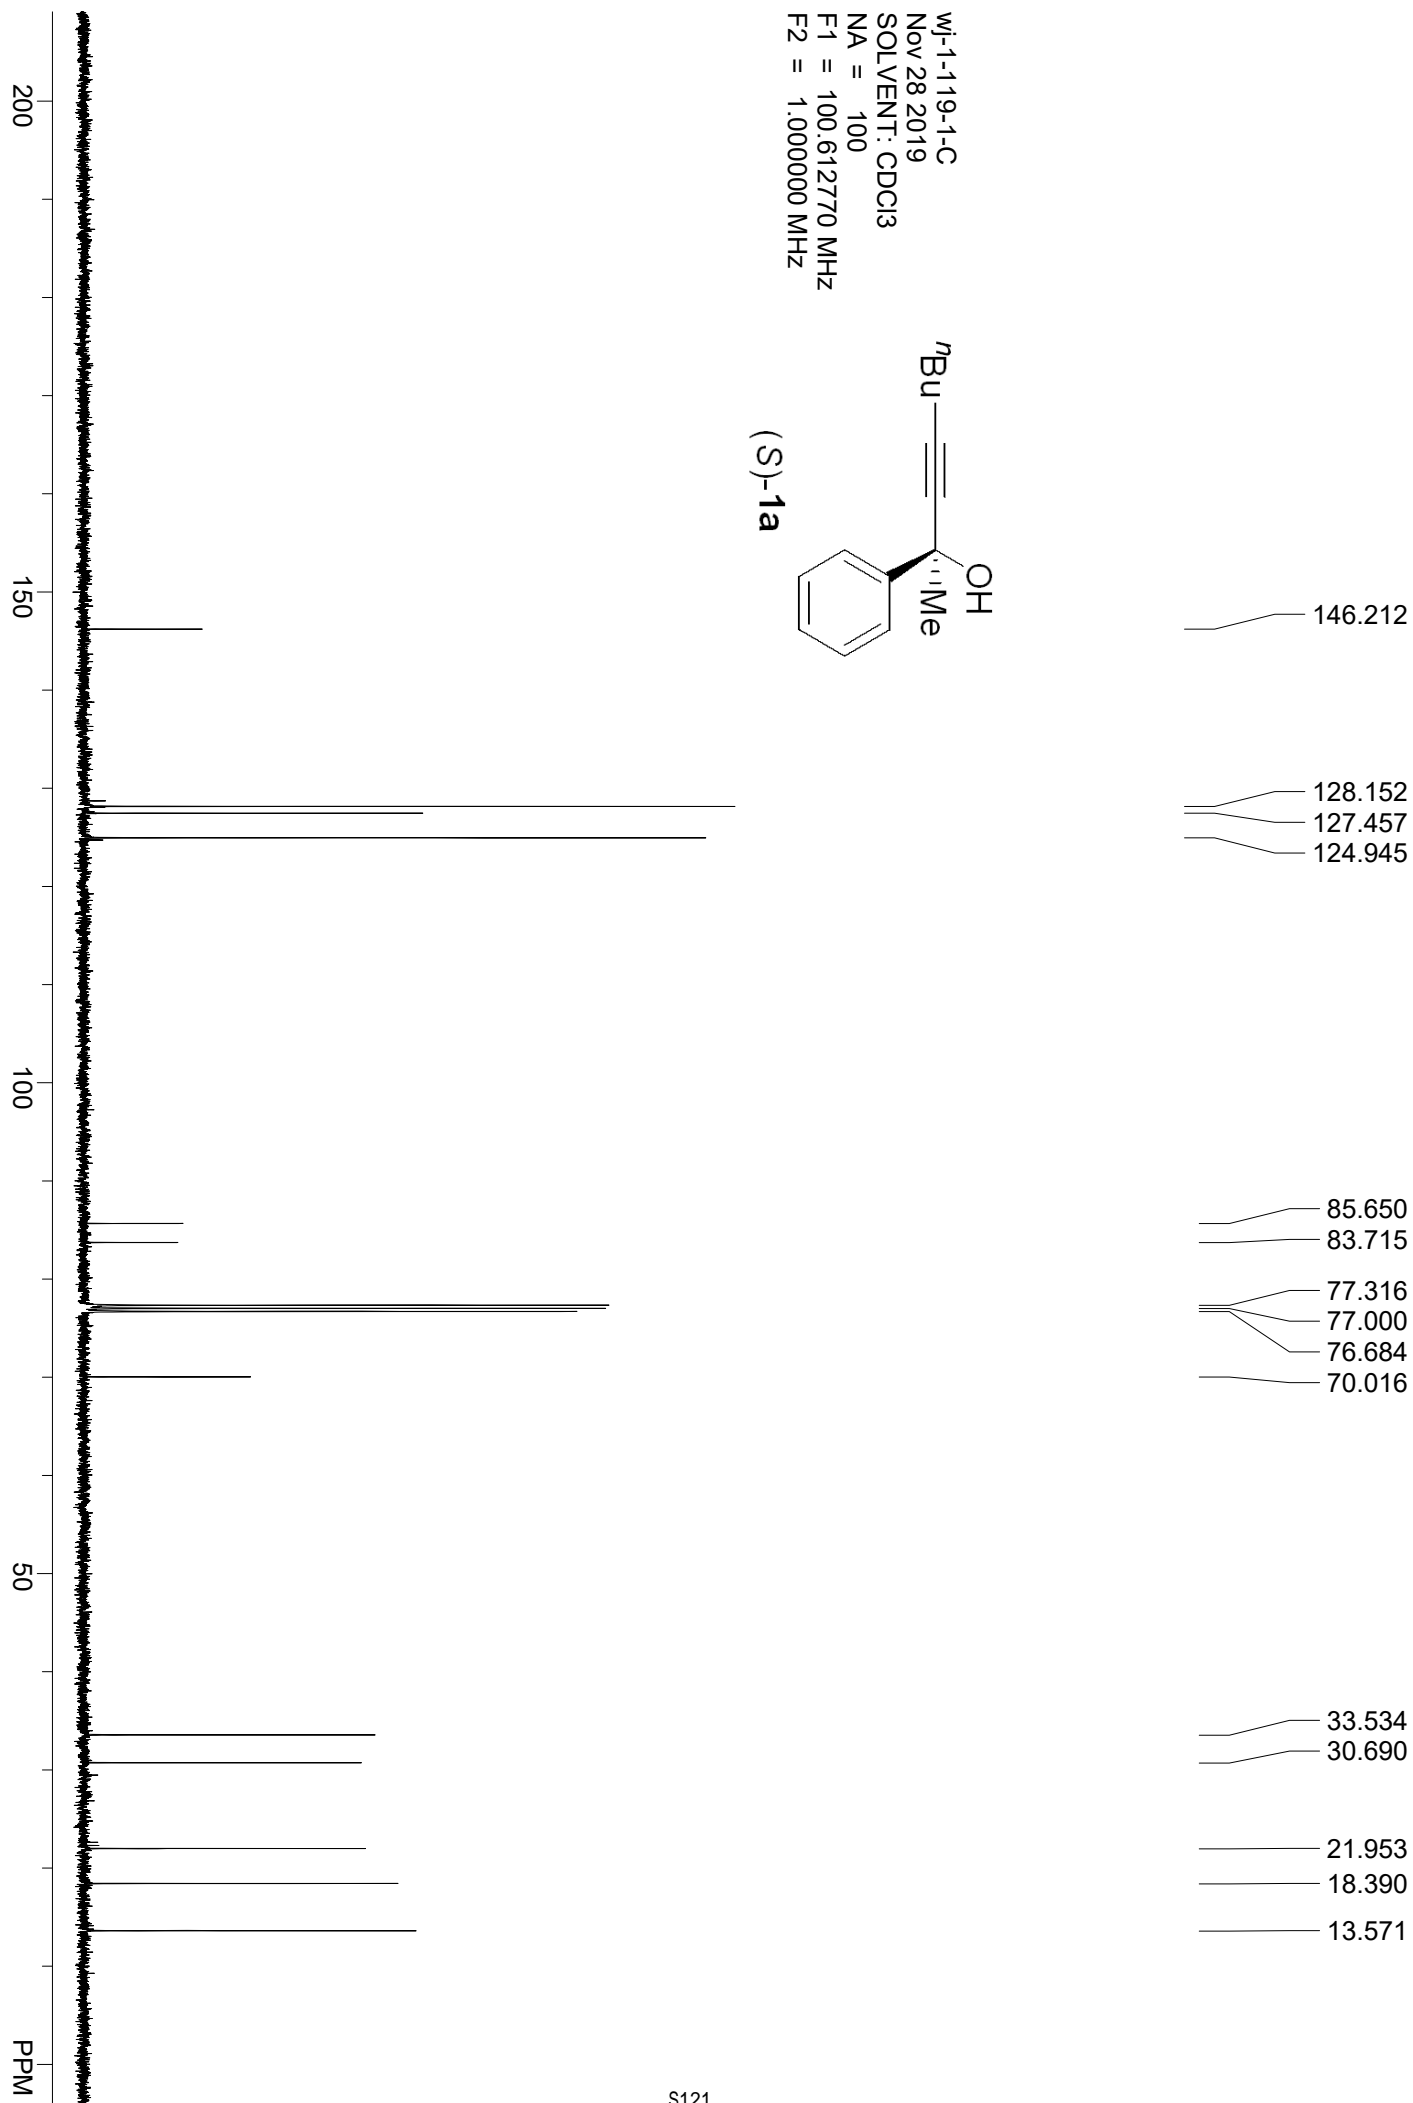

# Area Percent Report



Agilent Technologies

sample wj-1-119-1-AS-H-98-2-1.0-214

Data file: C:\Users\Public\Documents\ChemStation\1\Data\QAN 2019-11-28 10-39-56\017-P2-C1-wj-1-119-1.D

## Acquisition Data:

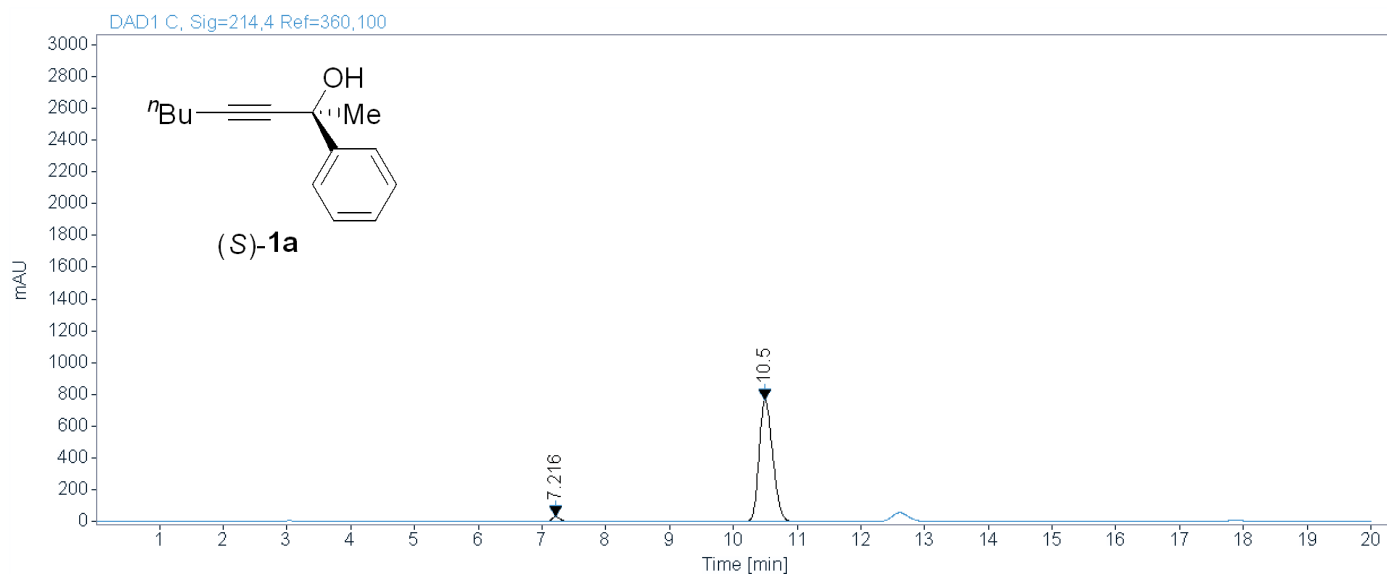

Signal: DAD1 C, Sig=214,4 Ref=360,100

| RT [min] | Width [min] | Height   | Area       | Area%    |
|----------|-------------|----------|------------|----------|
| 7.216    | 0.1426      | 29.3874  | 268.4327   | 2.3094   |
| 10.500   | 0.2329      | 766.0494 | 11354.9678 | 97.6906  |
| Sum      |             |          | 11623.4005 | 100.0000 |

# Area Percent Report



Agilent Technologies

sample wj-1-119-1-rac-AS-H-98-2-1.0-214

Data file: C:\Users\Public\Documents\ChemStation\1\Data\QAN 2019-11-28 10-39-56\018-P2-C2-wj-1-119-1-rac.D

## Acquisition Data:

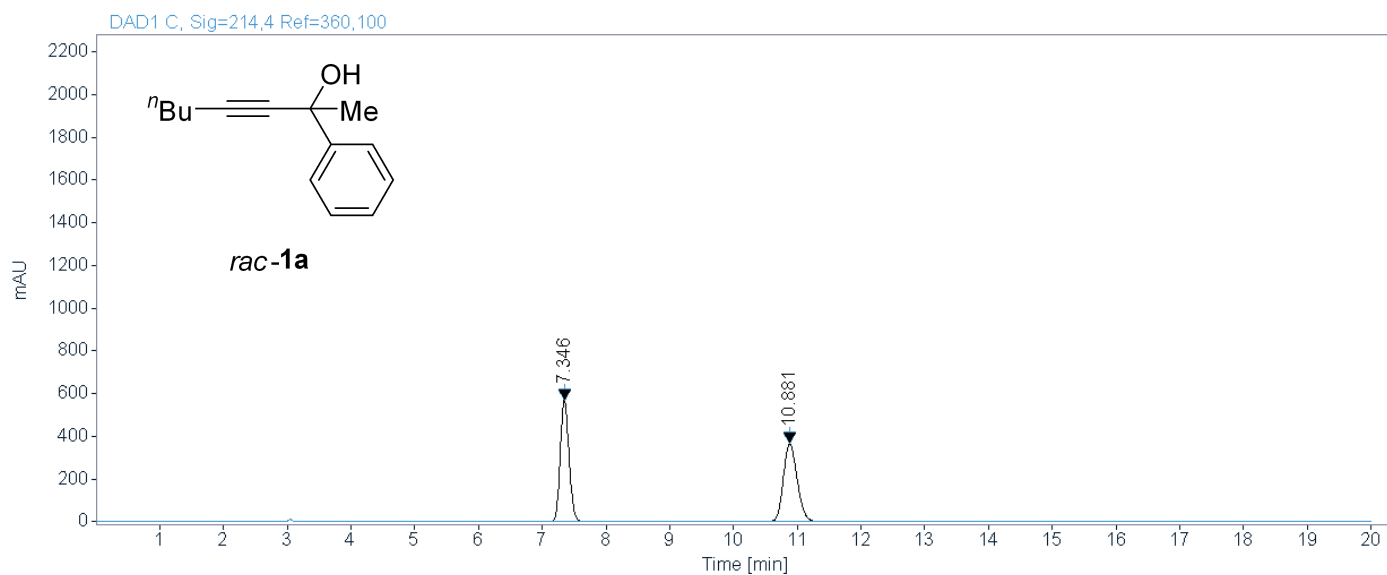

Signal: DAD1 C, Sig=214,4 Ref=360,100

| RT [min] | Width [min] | Height   | Area       | Area%    |
|----------|-------------|----------|------------|----------|
| 7.346    | 0.1507      | 571.1263 | 5518.2622  | 49.9304  |
| 10.881   | 0.2368      | 365.1378 | 5533.6377  | 50.0696  |
| Sum      |             |          | 11051.8999 | 100.0000 |
